# Supplementary material for: GroopM: an automated tool for the recovery of population genomes from related metagenomes
Source: PeerJ. 2014 Sep 30;2:e603. doi: 10.7717/peerj.603 (PMC4183954; doi:10.7717/peerj.603)
Supplement: Data S1 — This excel spreadsheet contains several sheets containing large tables and other information referenced in the main manuscript as “Supplementary Data”. [file peerj-02-603-s001.xlsx]

## Sheet: Contents
Sheet name	Description
Reference genome abundances	Reference genomes and relative abundances in each simulated sample
Synthetic contig assignments	Complete llisting of Synthetic contigs with verified, TF-ESOM and GroopM bin assignments
GM_19_blue_contigs	Results for blasting contigs from GM_19 with clostest nucmer match to CARPRO against CARPRO bin
GM_11_blue_contigs	Results for blasting contigs from GM_11 with clostest nucmer match to CARPRO against CARPRO bin
GM_19_reg_CARPAC	Results for blasting contigs from GM_19 with clostest nucmer match to CARPAC against CARPAC bin
GM_19_red_CARPRO	Results for blasting contigs from GM_19 with clostest nucmer match to CARPAC against CARPRO bin
GM_34_vs_IMG	Results for blasting contigs from GM_34 with IMG reference sequences

## Sheet: Refernce genome abundances
			Read counts			Relative abundance (%)
IMG ID	Genome name	Sample 1	Sample 2	Sample 3	Sample 1	Sample 2	Sample 3	Total reads	Total relative abundance
640753014	NC_009712 Candidatus Methanoregula boonei 6A8, complete genome.	20802360	4414546	597160	0.171217	0.0384101	0.00465695	25814066	0.0707896
637000001	NC_008009 Acidobacteria bacterium Ellin345, complete genome.	0	0	23397734	0	0	0.182467	23397734	0.0641633
637000007	NC_007760 Anaeromyxobacter dehalogenans 2CP-C, complete genome.	7031786	8272634	922882	0.0578761	0.0719786	0.00719709	16227302	0.0444999
637000081	NC_003910 Colwellia psychrerythraea 34H, complete genome.	6592298	3227442	54290	0.0542589	0.0280814	0.00042338	9874030	0.0270774
639633033	NC_008508 Leptospira borgpetersenii serovar Hardjo-bovis L550 chromosome 1, complete sequence.	3369398	5379068	54290	0.0277323	0.0468022	0.00042338	8802756	0.0241397
2507262054	Cy51472_Contig181.1 Cyanothece sp. ATCC 51472 : Cy51472_Contig181.1	4150714	4414552	217154	0.034163	0.0384102	0.00169347	8782420	0.0240839
2509601044	SynarDRAFT_SAI.1 Syntrophorhabdus aromaticivorans UI : SynarDRAFT_SAI.1	4150710	4414548	54290	0.034163	0.0384101	0.00042338	8619548	0.0236373
644736384	NC_013192 Leptotrichia buccalis DSM 1135, complete genome.	4150708	4414546	54290	0.034163	0.0384101	0.00042338	8619544	0.0236373
639633063	NC_008554 Syntrophobacter fumaroxidans MPOB, complete genome.	4150708	4414546	0	0.034163	0.0384101	0	8565254	0.0234884
648028030	NC_014532 Halomonas elongata DSM 2581, complete genome.	2441594	5935522	108576	0.0200959	0.0516438	0.000846729	8485692	0.0232702
2506520044	Natoc_Contig267 Natronococcus occultus SP4, DSM 3396 : Natoc_Contig267	4883184	2782280	54290	0.0401917	0.0242081	0.00042338	7719754	0.0211698
637000288	NC_004350 Streptococcus mutans UA159, complete genome.	390656	370972	5591572	0.00321535	0.00322776	0.0436058	6353200	0.0174223
2517434011	A3EYDRAFT_scaffold00001.1 Loktanella hongkongensis DSM 17492 : A3EYDRAFT_scaffold00001.1	0	0	6351590	0	0	0.0495328	6351590	0.0174179
650377937	FP929043 Eubacterium rectale M104/1 draft genome.	2490426	3746800	54470	0.0204978	0.0326002	0.000424784	6291696	0.0172536
637000008	NC_004842 Anaplasma marginale str. St. Maries, complete genome.	732480	259682	4668690	0.00602878	0.00225944	0.0364088	5660852	0.0155237
650716070	NC_015690 Paenibacillus mucilaginosus KNP414 chromosome, complete genome.	0	74196	5374424	0	0.000645565	0.0419124	5448620	0.0149417
2506381025	Contig423 Methanoplanus limicola M3, DSM 2279 : Contig423	830144	4414546	162870	0.00683262	0.0384101	0.00127014	5407560	0.0148291
2513237180	NC_017731 Providencia stuartii MRSN 2154 : NC_017731	439488	185488	4288684	0.00361727	0.0016139	0.0334453	4913660	0.0134747
2511231109	NC_015847 Methanococcus maripaludis X1 : NC_015847	3174070	1595174	54290	0.0261246	0.0138793	0.00042338	4823534	0.0132275
2516653073	HalkaDRAFT_scaffold1.1 Halomicrobium katesii DSM 19301 : HalkaDRAFT_scaffold1.1	0	0	4777266	0	0	0.0372555	4777266	0.0131006
637000009	NC_007797 Anaplasma phagocytophilum HZ, complete genome.	0	0	4668696	0	0	0.0364088	4668696	0.0128029
637000256	NC_007954 Shewanella denitrificans OS217, complete genome.	2685752	1743562	54292	0.0221055	0.0151704	0.000423396	4483606	0.0122953
2510065083	PatmiDRAFT_Scaffold1.1 Patulibacter minatonensis KV-614, DSM 18081 : PatmiDRAFT_Scaffold1.1	1953276	1038718	54290	0.0160767	0.00903769	0.00042338	3046284	0.00835379
2505679080	Contig182 Sphingobacterium sp. 21 : Contig182	1611452	1224204	54290	0.0132633	0.0106516	0.00042338	2889946	0.00792507
2511231069	NC_016026 Micavibrio aeruginosavorus ARL-13 : NC_016026	0	0	2768646	0	0	0.0215913	2768646	0.00759243
637000060	NC_007503 Carboxydothermus hydrogenoformans Z-2901, complete genome.	48834	37100	2605782	0.000401935	0.0003228	0.0203212	2691716	0.00738146
646564530	NC_013971 Erwinia amylovora ATCC 49946, complete genome.	1611452	964526	54292	0.0132633	0.00839216	0.000423396	2630270	0.00721296
644736355	NC_012912 Dickeya zeae Ech1591, complete genome.	244162	74196	2008624	0.00200961	0.000645565	0.0156642	2326982	0.00638126
640427128	NC_009454 Pelotomaculum thermopropionicum SI, complete genome.	0	0	2280060	0	0	0.017781	2280060	0.00625258
639633064	NC_008696 Thermofilum pendens Hrk 5 plasmid pTPEN01, complete sequence.	1074302	890330	54290	0.0088422	0.00774659	0.00042338	2018922	0.00553647
651053046	FR668087 Mycoplasma leachii 99/014/6 complete genome.	0	0	2008652	0	0	0.0156645	2008652	0.0055083
641228500	NC_010003 Petrotoga mobilis SJ95, complete genome.	0	0	1954336	0	0	0.0152409	1954336	0.00535935
650377919	FP929036 Butyrivibrio fibrisolvens 16/4 draft genome.	1025470	482264	325724	0.00844028	0.00419609	0.00254016	1833458	0.00502787
642555108	NC_010673 Borrelia hermsii DAH, complete genome.	0	0	1682902	0	0	0.0131241	1682902	0.004615
649633076	NC_014935 Nitratifractor salsuginis DSM 16511 chromosome, complete genome.	0	0	1682902	0	0	0.0131241	1682902	0.004615
642555146	NC_011060 Pelodictyon phaeoclathratiforme BU-1, complete genome.	927806	556458	108578	0.00763644	0.00484163	0.000846745	1592842	0.00436803
2506485001	Contig126 Emticicia oligotrophica GPTSA100-15, DSM 17448 : Contig126	878978	556460	108576	0.00723455	0.00484165	0.000846729	1544014	0.00423413
639633052	NC_008709 Psychromonas ingrahamii 37, complete genome.	1074302	408070	54290	0.0088422	0.00355054	0.00042338	1536662	0.00421397
646564503	NC_014011 Aminobacterium colombiense DSM 12261 chromosome, complete genome.	97666	0	1302892	0.000803854	0	0.0101606	1400558	0.00384073
646311943	NC_013790 Methanobrevibacter ruminantium M1 chromosome, complete genome.	830144	333876	108576	0.00683262	0.00290499	0.000846729	1272596	0.00348983
648028061	NC_014377 Thermosediminibacter oceani DSM 16646 chromosome, complete genome.	537152	667748	54392	0.00442111	0.00580995	0.000424176	1259292	0.00345334
643348556	NC_011852 Haemophilus parasuis SH0165, complete genome.	537152	593554	108578	0.00442111	0.0051644	0.000846745	1239284	0.00339847
641522641	NC_010394 Mycobacterium abscessus plasmid, complete genome.	0	0	1194318	0	0	0.00931388	1194318	0.00327516
644736326	NC_013164 Anaerococcus prevotii DSM 20548 plasmid pAPRE01, complete sequence.	0	0	1194318	0	0	0.00931388	1194318	0.00327516
2512047086	SinarDRAFT_Scaffold6.1 Sinorhizobium arboris LMG 14919 : SinarDRAFT_Scaffold6.1	732486	222588	217150	0.00602883	0.0019367	0.00169344	1172224	0.00321458
648028022	NC_014314 Dehalogenimonas lykanthroporepellens BL-DC-9 chromosome, complete genome.	292992	222584	651446	0.00241151	0.00193666	0.0050803	1167022	0.00320031
642555150	NC_010554 Proteus mirabilis HI4320, complete genome.	683648	296778	162864	0.00562686	0.00258221	0.00127009	1143290	0.00313523
640427106	NC_009437 Caldicellulosiruptor saccharolyticus DSM 8903, complete genome.	0	0	1140030	0	0	0.00889052	1140030	0.00312629
646564589	NC_013892 Xenorhabdus bovienii SS-2004, complete genome.	830144	185488	54290	0.00683262	0.0016139	0.00042338	1069922	0.00293404
637000241	NC_007641 Rhodospirillum rubrum ATCC 11170 plasmid unnamed, complete sequence.	0	37100	1031456	0	0.0003228	0.0080438	1068556	0.00293029
637000184	NC_002771 Mycoplasma pulmonis UAB CTIP, complete genome.	0	1038718	0	0	0.00903769	0	1038718	0.00284846
640753045	NC_009879 Rickettsia canadensis str. McKiel, complete genome.	488320	370972	162864	0.00401919	0.00322776	0.00127009	1022156	0.00280305
637000005	NC_008340 Alkalilimnicola ehrlichei MLHE-1, complete genome.	0	37100	922882	0	0.0003228	0.00719709	959982	0.00263255
642555151	NC_010678 Ralstonia pickettii 12J chromosome 2, complete sequence.	195332	519362	162864	0.00160771	0.00451887	0.00127009	877558	0.00240652
644736411	NC_012804 Thermococcus gammatolerans EJ3, complete genome.	390656	408070	54292	0.00321535	0.00355054	0.000423396	853018	0.00233922
649633010	NC_014829 Bacillus cellulosilyticus DSM 2522 chromosome, complete genome.	48834	148390	651446	0.000401935	0.00129111	0.0050803	848670	0.0023273
2515154157	B149DRAFT_scaffold_0.1 Desulfovibrio oxyclinae DSM 11498 : B149DRAFT_scaffold_0.1	488354	296808	54290	0.00401947	0.00258247	0.00042338	839452	0.00230202
641228485	NC_010175 Chloroflexus aurantiacus J-10-fl, complete genome.	488320	296778	54304	0.00401919	0.00258221	0.000423489	839402	0.00230188
637000080	NC_004557 Clostridium tetani E88, complete genome.	146498	148390	542872	0.00120577	0.00129111	0.00423358	837760	0.00229738
639633030	NC_008530 Lactobacillus gasseri ATCC 33323, complete genome.	195330	37100	597164	0.00160769	0.0003228	0.00465698	829594	0.00227499
643348582	NC_011959 Thermomicrobium roseum DSM 5159, complete genome.	390656	370972	54290	0.00321535	0.00322776	0.00042338	815918	0.00223748
2515154147	A3G3DRAFT_scaffold_0.1 Moraxella boevrei DSM 14165 : A3G3DRAFT_scaffold_0.1	244208	556500	0	0.00200999	0.004842	0	800708	0.00219577
639633004	NC_008570 Aeromonas hydrophila subsp. hydrophila ATCC 7966, complete genome.	48834	74196	651446	0.000401935	0.000645565	0.0050803	774476	0.00212384
640753058	NC_009777 Vibrio harveyi ATCC BAA-1116 plasmid pVIBHAR, complete sequence.	488322	222586	54290	0.0040192	0.00193668	0.00042338	765198	0.00209839
640069314	NC_008818 Hyperthermus butylicus DSM 5456, complete genome.	488320	222584	54290	0.00401919	0.00193666	0.00042338	765194	0.00209838
637000158	NC_006055 Mesoplasma florum L1, complete genome.	97666	519360	108576	0.000803854	0.00451885	0.000846729	725602	0.00198981
637000065	NC_004552 Chlamydophila abortus S26/3, complete genome.	439488	222584	54290	0.00361727	0.00193666	0.00042338	716362	0.00196447
2511231169	CP003137 Pediococcus claussenii P06, ATCC BAA-344 : CP003137	0	74204	597160	0	0.000645635	0.00465695	671364	0.00184107
641228503	NC_009897 Rickettsia massiliae MTU5 plasmid pRMA, complete sequence.	146498	296778	217152	0.00120577	0.00258221	0.00169346	660428	0.00181108
644736335	NC_012960 Candidatus Hodgkinia cicadicola Dsem, complete genome.	48834	0	597160	0.000401935	0	0.00465695	645994	0.0017715
2506520038	Rahaq_Contig67 Rahnella aquatilis CUETM 77-115 : Rahaq_Contig67	439488	111296	54290	0.00361727	0.000968365	0.00042338	605074	0.00165929
2515154139	A3G9DRAFT_scaffold_0.1 Oenococcus oeni DSM 20252 : A3G9DRAFT_scaffold_0.1	195354	296808	108576	0.00160789	0.00258247	0.000846729	600738	0.0016474
2511231206	CP002645 Buchnera aphidicola Ak : CP002645	0	0	597160	0	0	0.00465695	597160	0.00163759
2509276062	Solca_Contig255.1 Solitalea canadensis USAM 9D, DSM 3403 : Solca_Contig255.1	244162	296778	54290	0.00200961	0.00258221	0.00042338	595230	0.00163229
2517093004	B150DRAFT_scaffold_0.1 Kordiimonas gwangyangensis DSM 19435 : B150DRAFT_scaffold_0.1	195340	333884	54290	0.00160777	0.00290506	0.00042338	583514	0.00160016
640069329	NC_009142 Saccharopolyspora erythraea NRRL 2338, complete genome.	195330	333876	54290	0.00160769	0.00290499	0.00042338	583496	0.00160011
646564580	NC_014209 Thermoanaerobacter mathranii subsp. mathranii str. A3 chromosome, complete genome.	48834	408070	108580	0.000401935	0.00355054	0.000846761	565484	0.00155072
646311905	NC_013532 Anaplasma centrale str. Israel, complete genome.	390656	111294	54292	0.00321535	0.000968348	0.000423396	556242	0.00152538
642487181	NC_010483 Thermotoga sp. RQ2, complete genome.	244162	148390	162864	0.00200961	0.00129111	0.00127009	555416	0.00152311
646311967	NC_013722 Xanthomonas albilineans, complete genome.	195330	296778	54290	0.00160769	0.00258221	0.00042338	546398	0.00149838
650377904	FP929032 Alistipes shahii WAL 8301 draft genome.	341824	148390	54340	0.00281343	0.00129111	0.00042377	544554	0.00149332
641522661	NC_010465 Yersinia pseudotuberculosis YPIII, complete genome.	97666	111294	325724	0.000803854	0.000968348	0.00254016	534684	0.00146626
646311963	NC_013510 Thermomonospora curvata DSM 43183, complete genome.	146498	333876	54290	0.00120577	0.00290499	0.00042338	534664	0.0014662
640427134	NC_009516 Psychrobacter sp. PRwf-1 plasmid pRWF101, complete sequence.	97666	370974	54290	0.000803854	0.00322777	0.00042338	522930	0.00143403
2509601014	XfasoDRAFT_39348.1 Xylella fastidiosa sandyi Ann-1 : XfasoDRAFT_39348.1	293168	0	217150	0.00241296	0	0.00169344	510318	0.00139944
2510065084	CryarDRAFT_CAH.1 Cryptosporangium arvum YU 629-21, DSM 44712 : CryarDRAFT_CAH.1	195330	148390	162864	0.00160769	0.00129111	0.00127009	506584	0.0013892
643692048	NC_012622 Sulfolobus islandicus Y.G.57.14, complete genome.	48834	74196	380012	0.000401935	0.000645565	0.00296352	503042	0.00137949
640753032	NC_009648 Klebsiella pneumoniae subsp. pneumoniae MGH 78578, complete genome.	97670	296782	108576	0.000803887	0.00258224	0.000846729	503028	0.00137945
643692023	NC_012673 Exiguobacterium sp. AT1b, complete genome.	146498	296778	54304	0.00120577	0.00258221	0.000423489	497580	0.00136451
644736366	NC_012778 Eubacterium eligens ATCC 27750, complete genome.	0	0	488596	0	0	0.00381031	488596	0.00133987
649633039	NC_015185 Desulfurobacterium thermolithotrophum DSM 11699 chromosome, complete genome.	48834	37100	380012	0.000401935	0.0003228	0.00296352	465946	0.00127776
649633082	NC_015177 Pedobacter saltans DSM 12145 chromosome, complete genome.	146498	37100	271438	0.00120577	0.0003228	0.00211681	455036	0.00124784
2512564078	CP003389 Corallococcus coralloides DSM 2259 : CP003389	48834	185488	217150	0.000401935	0.0016139	0.00169344	451472	0.00123807
637000186	NC_008095 Myxococcus xanthus DK 1622, complete genome.	195330	37100	217150	0.00160769	0.0003228	0.00169344	449580	0.00123288
637000093	NC_007907 Desulfitobacterium hafniense Y51, complete genome.	97666	296778	54368	0.000803854	0.00258221	0.000423989	448812	0.00123077
646311937	NC_013850 Klebsiella variicola At-22 chromosome, complete genome.	292992	148390	0	0.00241151	0.00129111	0	441382	0.0012104
2507525000	ProkrDRAFT_PKA.1 Promicromonospora kroppenstedtii RS16, DSM 19349 : ProkrDRAFT_PKA.1	146692	185692	108576	0.00120737	0.00161567	0.000846729	440960	0.00120924
642555142	NC_010715 Natranaerobius thermophilus JW/NM-WN-LF plasmid pNTHE01, complete sequence.	0	0	434298	0	0	0.00338687	434298	0.00119097
637000073	NC_002932 Chlorobium tepidum TLS, complete genome.	244162	185488	0	0.00200961	0.0016139	0	429650	0.00117822
2515154075	B057DRAFT_scaffold_0.1 Novosphingobium nitrogenifigens DSM 19370 : B057DRAFT_scaffold_0.1	0	37154	380012	0	0.00032327	0.00296352	417166	0.00114399
2509887032	HalsacDRAFT_HSE.1 Halonatronum saccharophilum Z-7986, DSM 13868 : HalsacDRAFT_HSE.1	341830	74204	0	0.00281348	0.000645635	0	416034	0.00114089
637000057	NC_007292 Candidatus Blochmannia pennsylvanicus str. BPEN, complete genome.	48834	37100	325724	0.000401935	0.0003228	0.00254016	411658	0.00112889
2508501068	TheveDRAFT_TVB.1 Thermanaerovibrio velox Z-9701, DSM 12556 : TheveDRAFT_TVB.1	244162	111294	54290	0.00200961	0.000968348	0.00042338	409746	0.00112364
2509276008	HPDFL43_oriC_predicted.1 Hoeflea phototrophica DFL-43 : HPDFL43_oriC_predicted.1	97670	148396	162864	0.000803887	0.00129117	0.00127009	408930	0.0011214
646564536	NC_013964 Haloferax volcanii DS2 plasmid pHV3, complete sequence.	48836	296780	54290	0.000401952	0.00258223	0.00042338	399906	0.00109666
2513020036	NitalDRAFT_Scaffold1.1 Nitriliruptor alkaliphilus DSM 45188 : NitalDRAFT_Scaffold1.1	244162	148390	0	0.00200961	0.00129111	0	392552	0.00107649
2504756059	Contig38 Methylomonas mecanica MC09 : Contig38	97666	185488	108576	0.000803854	0.0016139	0.000846729	391730	0.00107424
646311947	NC_013421 Pectobacterium wasabiae WPP163, complete genome.	0	0	380224	0	0	0.00296517	380224	0.00104268
642555172	NS_000191 Uncultured Termite group 1 bacterium phylotype Rs-D17 [uncultured Termite group 1 bacterium phylotype Rs-D17].	0	0	380016	0	0	0.00296355	380016	0.00104211
643348504	NC_011983 Agrobacterium radiobacter K84 chromosome 2, complete genome.	0	0	380012	0	0	0.00296352	380012	0.0010421
2506783064	Sulba_Contig204.1 Sulfurospirillum barnesii SES-3 : Sulba_Contig204.1	0	0	380012	0	0	0.00296352	380012	0.0010421
2508501106	MycrhN_Contig54.1 Mycobacterium rhodesiae NBB3 : MycrhN_Contig54.1	0	0	380012	0	0	0.00296352	380012	0.0010421
2509276007	EubceDRAFT_ECV.1 Eubacterium cellulosolvens 6 : EubceDRAFT_ECV.1	0	0	380012	0	0	0.00296352	380012	0.0010421
644736357	NC_012779 Edwardsiella ictaluri 93-146, complete genome.	195330	74196	108576	0.00160769	0.000645565	0.000846729	378102	0.00103686
640753020	NC_009466 Clostridium kluyveri DSM 555 plasmid pCKL555A, complete sequence.	97666	111294	162864	0.000803854	0.000968348	0.00127009	371824	0.00101965
640427130	NC_009337 Prosthecochloris vibrioformis DSM 265, complete genome.	48834	259682	54294	0.000401935	0.00225944	0.000423411	362810	0.00099493
646564509	NC_014219 Bacillus selenitireducens MLS10 chromosome, complete genome.	195330	111294	54442	0.00160769	0.000968348	0.000424566	361066	0.000990147
637000010	NC_000918 Aquifex aeolicus VF5, complete genome.	146498	148390	54290	0.00120577	0.00129111	0.00042338	349178	0.000957547
2508501103	JonanDRAFT_JAB.1 Jonquetella anthropi ADV 126, DSM 22815 : JonanDRAFT_JAB.1	146498	148390	54290	0.00120577	0.00129111	0.00042338	349178	0.000957547
637000020	NC_002570 Bacillus halodurans C-125, complete genome.	0	74196	271440	0	0.000645565	0.00211682	345636	0.000947834
637000287	NC_004368 Streptococcus agalactiae NEM316, complete genome.	97666	185488	54290	0.000803854	0.0016139	0.00042338	337444	0.000925369
649633063	NC_014655 Leadbetterella byssophila DSM 17132 chromosome, complete genome.	97666	185488	54290	0.000803854	0.0016139	0.00042338	337444	0.000925369
644736339	NC_013131 Catenulispora acidiphila DSM 44928, complete genome.	146498	185488	0	0.00120577	0.0016139	0	331986	0.000910401
2517287030	HALNADRAFT_scaffold1.1 Haloplanus natans RE 101, DSM 17983 : HALNADRAFT_scaffold1.1	0	222590	108576	0	0.00193671	0.000846729	331166	0.000908153
641522636	NC_010466 Leuconostoc citreum KM20 plasmid pLCK2, complete sequence.	0	0	325728	0	0	0.00254019	325728	0.00089324
640069312	NC_009328 Geobacillus thermodenitrificans NG80-2, complete genome.	0	0	325724	0	0	0.00254016	325724	0.000893229
637000284	NC_007350 Staphylococcus saprophyticus subsp. saprophyticus ATCC 15305, complete genome.	48836	222586	54290	0.000401952	0.00193668	0.00042338	325712	0.000893196
649633014	NC_014932 Bartonella clarridgeiae 73, complete genome.	244162	74196	0	0.00200961	0.000645565	0	318358	0.00087303
650377930	FP929058 Enterococcus sp. 7L76 draft genome.	97666	0	217150	0.000803854	0	0.00169344	314816	0.000863316
637000099	NC_006831 Ehrlichia ruminantium str. Gardel, complete genome.	146498	111294	54290	0.00120577	0.000968348	0.00042338	312082	0.000855819
2516493012	Met42DRAFT_scaffold1.1 Methylophilus sp. 42 : Met42DRAFT_scaffold1.1	97666	148390	54300	0.000803854	0.00129111	0.000423458	300356	0.000823663
637000058	NC_007205 Candidatus Pelagibacter ubique HTCC1062, complete genome.	146498	37100	108576	0.00120577	0.0003228	0.000846729	292174	0.000801225
640069334	NC_009009 Streptococcus sanguinis SK36, complete genome.	48834	185488	54320	0.000401935	0.0016139	0.000423614	288642	0.00079154
649633052	NC_014654 Halanaerobium sp. 'sapolanicus' chromosome, complete genome.	195330	37100	54340	0.00160769	0.0003228	0.00042377	286770	0.000786406
2513237166	A3A7DRAFT_scaffold_0.1 Burkholderia sp. UYPR1.413 : A3A7DRAFT_scaffold_0.1	49162	74532	162864	0.000404635	0.000648489	0.00127009	286558	0.000785825
643692032	NC_000914 Rhizobium sp. NGR234 plasmid pNGR234a, complete sequence.	48834	74198	162864	0.000401935	0.000645583	0.00127009	285896	0.000784009
639633040	NC_008769 Mycobacterium bovis BCG str. Pasteur 1173P2, complete genome.	48834	74196	162864	0.000401935	0.000645565	0.00127009	285894	0.000784004
649633098	NC_015172 Syntrophobotulus glycolicus DSM 8271 chromosome, complete genome.	244162	37100	0	0.00200961	0.0003228	0	281262	0.000771302
2503982039	Bcop18011_Contig148 Bacteroides coprosuis PC 139, DSM 18011 : Bcop18011_Contig148	0	222584	54306	0	0.00193666	0.000423505	276890	0.000759312
2507262047	Flav5CDRAFT_JRC.1 Flavobacteria sp. MS220-5C : Flav5CDRAFT_JRC.1	146520	74212	54290	0.00120595	0.000645704	0.00042338	275022	0.00075419
2513237203	NC_017739 Helicobacter pylori Shi417 : NC_017739	146498	74196	54292	0.00120577	0.000645565	0.000423396	274986	0.000754091
637000267	NC_003911 Silicibacter pomeroyi DSS-3, complete genome.	146498	74196	54290	0.00120577	0.000645565	0.00042338	274984	0.000754086
643692018	NC_010813 Corynebacterium aurimucosum plasmid pET44827, complete sequence.	146498	74196	54290	0.00120577	0.000645565	0.00042338	274984	0.000754086
643692037	NC_012121 Staphylococcus carnosus subsp. carnosus TM300, complete genome.	0	0	271438	0	0	0.00211681	271438	0.000744361
2508501048	Thi970_THB.1 Thiorhodovibrio sp. 970 : Thi970_THB.1	0	0	271438	0	0	0.00211681	271438	0.000744361
641228476	NC_009937 Azorhizobium caulinodans ORS 571, complete genome.	48834	222584	0	0.000401935	0.00193666	0	271418	0.000744307
643348523	NC_011000 Burkholderia cenocepacia J2315 chromosome 1, complete genome.	48834	0	217150	0.000401935	0	0.00169344	265984	0.000729405
2516653054	A39UDRAFT_scaffold2.1 Acetobacter aceti ATCC 23746 : A39UDRAFT_scaffold2.1	97668	111294	54290	0.000803871	0.000968348	0.00042338	263252	0.000721913
644736388	NC_012968 Methylotenera mobilis JLW8, complete genome.	97666	111294	54290	0.000803854	0.000968348	0.00042338	263250	0.000721908
2509276029	XylorDRAFT_XOA.1 Xylanibacter oryzae KB 3, DSM 17970 : XylorDRAFT_XOA.1	97666	0	162864	0.000803854	0	0.00127009	260530	0.000714448
651053064	AP011957 Salmonella enterica subsp. enterica serovar Typhimurium str. T000240 DNA, complete genome.	0	259684	0	0	0.00225946	0	259684	0.000712129
637000085	NC_003080 Corynebacterium jeikeium K411 plasmid pKW4, complete sequence.	0	259682	0	0	0.00225944	0	259682	0.000712123
643348565	NC_011666 Methylocella silvestris BL2, complete genome.	0	259682	0	0	0.00225944	0	259682	0.000712123
637000011	NC_007716 Aster yellows witches'-broom phytoplasma AYWB, complete genome.	146500	111298	0	0.00120579	0.000968383	0	257798	0.000706957
637000174	NC_007633 Mycoplasma capricolum subsp. capricolum ATCC 27343, complete genome.	0	148390	108576	0	0.00129111	0.000846729	256966	0.000704675
639633053	NC_008701 Pyrobaculum islandicum DSM 4184, complete genome.	0	148390	108576	0	0.00129111	0.000846729	256966	0.000704675
639633001	NC_008578 Acidothermus cellulolyticus 11B, complete genome.	0	37100	217150	0	0.0003228	0.00169344	254250	0.000697227
650716097	NC_015865 Thermococcus sp. 4557 chromosome, complete genome.	0	37100	217150	0	0.0003228	0.00169344	254250	0.000697227
650377973	CP002541 Spirochaeta sp. Buddy, complete genome.	48834	148390	54290	0.000401935	0.00129111	0.00042338	251514	0.000689724
640427120	NC_009440 Metallosphaera sedula DSM 5348, complete genome.	97666	148390	0	0.000803854	0.00129111	0	246056	0.000674757
644736393	NC_013235 Nakamurella multipartita DSM 44233, complete genome.	97666	148390	0	0.000803854	0.00129111	0	246056	0.000674757
650377984	CP002377 Vibrio furnissii NCTC 11218 chromosome 1, complete sequence.	97666	148390	0	0.000803854	0.00129111	0	246056	0.000674757
641522626	NC_010549 Exiguobacterium sibiricum 255-15 plasmid pEXIG01, complete sequence.	244164	0	0	0.00200963	0	0	244164	0.000669568
640069320	NC_009077 Mycobacterium sp. JLS, complete genome.	244162	0	0	0.00200961	0	0	244162	0.000669563
639633046	NC_008697 Nocardioides sp. JS614 plasmid pNOCA01, complete sequence.	0	185488	54402	0	0.0016139	0.000424254	239890	0.000657848
648028010	NC_014375 Brevundimonas subvibrioides ATCC 15264 chromosome, complete genome.	0	185488	54292	0	0.0016139	0.000423396	239780	0.000657546
643348543	NC_011661 Dictyoglomus turgidum DSM 6724, complete genome.	0	185488	54290	0	0.0016139	0.00042338	239778	0.000657541
2506783053	Contig183 Gillisia limnaea R-8282, DSM 15749 : Contig183	0	74196	162886	0	0.000645565	0.00127027	237082	0.000650147
637000136	NC_006512 Idiomarina loihiensis L2TR, complete genome.	195330	37100	0	0.00160769	0.0003228	0	232430	0.00063739
643692025	NC_012028 Halorubrum lacusprofundi ATCC 49239 chromosome 2, complete genome.	48836	74196	108576	0.000401952	0.000645565	0.000846729	231608	0.000635136
637000163	NC_007681 Methanosphaera stadtmanae DSM 3091, complete genome.	48834	74196	108576	0.000401935	0.000645565	0.000846729	231606	0.000635131
640427112	NC_009446 Dichelobacter nodosus VCS1703A, complete genome.	97666	74196	54290	0.000803854	0.000645565	0.00042338	226152	0.000620174
644736347	NC_010528 Cupriavidus taiwanensis str. LMG19424 chromosome I, complete genome.	97666	74196	54290	0.000803854	0.000645565	0.00042338	226152	0.000620174
2513237199	NC_017075 Rubrivivax gelatinosus IL144 : NC_017075	97666	74196	54290	0.000803854	0.000645565	0.00042338	226152	0.000620174
2515154155	B141DRAFT_scaffold_0.1 Actinopolymorpha alba DSM 45243 : B141DRAFT_scaffold_0.1	0	222718	0	0	0.00193783	0	222718	0.000610757
649633053	NC_014729 Halogeometricum borinquense DSM 11551 chromosome, complete genome.	0	222588	0	0	0.0019367	0	222588	0.000610401
641522631	NC_010364 Halobacterium salinarum R1, complete genome.	146500	74202	0	0.00120579	0.000645617	0	220702	0.000605229
637000130	NC_008229 Helicobacter acinonychis str. Sheeba, complete genome.	146498	74196	0	0.00120577	0.000645565	0	220694	0.000605207
639633038	NC_008553 Methanosaeta thermophila PT, complete genome.	146498	74196	0	0.00120577	0.000645565	0	220694	0.000605207
637000220	NC_004129 Pseudomonas fluorescens Pf-5, complete genome.	0	0	217154	0	0	0.00169347	217154	0.000595499
637000182	NC_004432 Mycoplasma penetrans HF-2, complete genome.	0	0	217150	0	0	0.00169344	217150	0.000595488
649633026	NC_014749 Calditerrivibrio nitroreducens DSM 19672 plasmid pCALNI01, complete sequence.	0	0	217150	0	0	0.00169344	217150	0.000595488
650377905	CP002379 Arthrobacter phenanthrenivorans Sphe3, complete genome.	0	0	217150	0	0	0.00169344	217150	0.000595488
2502957028	Dalke_NC_011768 Desulfatibacillum alkenivorans AK-01 (Desulfatibacillum alkenivorans AK-01) : Dalke_NC_011768	0	0	217150	0	0	0.00169344	217150	0.000595488
2516653072	B208DRAFT_contig1.1 Haladaptatus paucihalophilus DX253, DSM 18195 : B208DRAFT_contig1.1	0	0	217150	0	0	0.00169344	217150	0.000595488
650716015	NC_015722 Candidatus Midichloria mitochondrii IricVA chromosome, complete genome.	48834	111294	54290	0.000401935	0.000968348	0.00042338	214418	0.000587996
2506783059	Thimo_Contig50 Thioflavicoccus mobilis 8321 : Thimo_Contig50	48834	111294	54290	0.000401935	0.000968348	0.00042338	214418	0.000587996
2506520016	unknown Niastella koreensis GR20-10, DSM 17620 : unknown	48834	0	162864	0.000401935	0	0.00127009	211698	0.000580537
2506520039	Metfo_MFD Methanotorris formicicus Mc-S-70 : Metfo_MFD	48834	0	162864	0.000401935	0	0.00127009	211698	0.000580537
2513237158	A37KDRAFT_scaffold_0.1 Mariprofundus ferrooxydans M34 : A37KDRAFT_scaffold_0.1	97700	111330	0	0.000804134	0.000968661	0	209030	0.000573221
637000246	NC_006142 Rickettsia typhi str. Wilmington, complete genome.	97666	111294	0	0.000803854	0.000968348	0	208960	0.000573029
648028009	NC_014330 Brachyspira pilosicoli 95/1000 chromosome, complete genome.	97666	111294	0	0.000803854	0.000968348	0	208960	0.000573029
2515154191	A3GEDRAFT_scaffold_0.1 Pasteurella pneumotropica DSM 21403 : A3GEDRAFT_scaffold_0.1	0	148408	54290	0	0.00129127	0.00042338	202698	0.000555856
650716039	NC_015660 Geobacillus thermoglucosidasius C56-YS93 chromosome, complete genome.	146500	0	54290	0.00120579	0	0.00042338	200790	0.000550624
638154516	BA000001 Pyrococcus horikoshii OT3 DNA, complete genome.	146498	0	54290	0.00120577	0	0.00042338	200788	0.000550619
641228488	NC_008010 Deinococcus geothermalis DSM 11300 plasmid 1, complete sequence.	146498	0	54290	0.00120577	0	0.00042338	200788	0.000550619
650716034	NC_015738 Eggerthella sp. YY7918, complete genome.	146498	0	54290	0.00120577	0	0.00042338	200788	0.000550619
2515154175	B160DRAFT_scaffold_0.1 Niabella aurantiaca DSM 17617 : B160DRAFT_scaffold_0.1	0	37120	162864	0	0.000322974	0.00127009	199984	0.000548414
637000097	NC_007354 Ehrlichia canis str. Jake, complete genome.	48834	148390	0	0.000401935	0.00129111	0	197224	0.000540845
643692008	NC_012669 Beutenbergia cavernae DSM 12333, complete genome.	48834	148390	0	0.000401935	0.00129111	0	197224	0.000540845
644736389	NC_012969 Methylovorus sp. SIP3-4, complete genome.	48834	148390	0	0.000401935	0.00129111	0	197224	0.000540845
640753031	NC_009660 Kineococcus radiotolerans SRS30216 plasmid pKRAD02, complete sequence.	195332	0	0	0.00160771	0	0	195332	0.000535657
637000216	NC_008228 Pseudoalteromonas atlantica T6c, complete genome.	195330	0	0	0.00160769	0	0	195330	0.000535651
638154514	NC_000868 Pyrococcus abyssi GE5, complete genome.	195330	0	0	0.00160769	0	0	195330	0.000535651
644736397	NC_012917 Pectobacterium carotovorum subsp. carotovorum PC1, complete genome.	195330	0	0	0.00160769	0	0	195330	0.000535651
650716087	NC_015215 Streptococcus gallolyticus subsp. gallolyticus ATCC BAA-2069, complete genome.	195330	0	0	0.00160769	0	0	195330	0.000535651
2506520013	Contig188 Turneriella parva H, DSM 21527 : Contig188	97666	37100	54620	0.000803854	0.0003228	0.000425954	189386	0.000519351
646311913	NC_013716 Citrobacter rodentium ICC168, complete genome.	97670	37102	54292	0.000803887	0.000322817	0.000423396	189064	0.000518468
2517287032	A3M3DRAFT_scaffold1.1 Arthrobacter sp. MA-N2 : A3M3DRAFT_scaffold1.1	97668	37102	54290	0.000803871	0.000322817	0.00042338	189060	0.000518457
646311968	NC_013530 Xylanimonas cellulosilytica DSM 15894, complete genome.	97666	37100	54290	0.000803854	0.0003228	0.00042338	189056	0.000518446
646564591	NC_014041 Zunongwangia profunda SM-A87 chromosome, complete genome.	97666	37100	54290	0.000803854	0.0003228	0.00042338	189056	0.000518446
2516493024	MetLW4DRAFT_scaffold1.1 Methylosinus sp. LW4 : MetLW4DRAFT_scaffold1.1	0	185490	0	0	0.00161391	0	185490	0.000508667
637000196	NC_008341 Nitrosomonas eutropha C71 plasmid1, complete sequence.	0	185488	0	0	0.0016139	0	185488	0.000508662
2500868051	Saur_Contig1177 Spirochaeta aurantia subsp. aurantia M1 : Saur_Contig1177	0	185488	0	0	0.0016139	0	185488	0.000508662
2515154173	B129DRAFT_scaffold_0.1 Prevotella intermedia ATCC 25611 : B129DRAFT_scaffold_0.1	146518	37118	0	0.00120594	0.000322957	0	183636	0.000503583
650377985	CP002529 Vulcanisaeta moutnovskia 768-28, complete genome.	146498	37100	0	0.00120577	0.0003228	0	183598	0.000503479
650716052	NC_015216 Methanobacterium sp. AL-21 chromosome, complete genome.	146498	37100	0	0.00120577	0.0003228	0	183598	0.000503479
2515154152	B155DRAFT_scaffold_0.1 Balneola vulgaris DSM 17893 : B155DRAFT_scaffold_0.1	48854	74216	54290	0.0004021	0.000645739	0.00042338	177360	0.000486372
643692004	NC_012560 Azotobacter vinelandii DJ, complete genome.	48834	74196	54290	0.000401935	0.000645565	0.00042338	177320	0.000486263
640427126	NC_007794 Novosphingobium aromaticivorans DSM 12444, complete genome.	97666	74196	0	0.000803854	0.000645565	0	171862	0.000471295
644736390	NC_012803 Micrococcus luteus NCTC 2665, complete genome.	97666	74196	0	0.000803854	0.000645565	0	171862	0.000471295
649633038	NC_014836 Desulfurispirillum indicum S5 chromosome, complete genome.	97666	74196	0	0.000803854	0.000645565	0	171862	0.000471295
640427113	NC_009425 Enterobacter sp. 638 plasmid pENTE01, complete sequence.	0	111294	54372	0	0.000968348	0.00042402	165666	0.000454304
646311948	NC_013720 Pirellula staleyi DSM 6068, complete genome.	0	0	162884	0	0	0.00127025	162884	0.000446675
642555163	NC_011134 Streptococcus equi subsp. zooepidemicus str. MGCS10565, complete genome.	0	0	162882	0	0	0.00127023	162882	0.000446669
640753026	NC_009718 Fervidobacterium nodosum Rt17-B1, complete genome.	0	0	162866	0	0	0.00127011	162866	0.000446626
637000032	NC_002927 Bordetella bronchiseptica RB50, complete genome.	0	0	162864	0	0	0.00127009	162864	0.00044662
637000217	NC_007481 Pseudoalteromonas haloplanktis TAC125 chromosome I, complete sequence.	0	0	162864	0	0	0.00127009	162864	0.00044662
637000343	NC_007086 Xanthomonas campestris pv. campestris str. 8004, complete genome.	0	0	162864	0	0	0.00127009	162864	0.00044662
642555123	NC_011026 Chloroherpeton thalassium ATCC 35110, complete genome.	0	0	162864	0	0	0.00127009	162864	0.00044662
646311931	NC_013757 Geodermatophilus obscurus DSM 43160, complete genome.	0	0	162864	0	0	0.00127009	162864	0.00044662
646564505	NC_014218 Arcanobacterium haemolyticum DSM 20595 chromosome, complete genome.	0	0	162864	0	0	0.00127009	162864	0.00044662
646564571	NC_013947 Stackebrandtia nassauensis DSM 44728 chromosome, complete genome.	0	0	162864	0	0	0.00127009	162864	0.00044662
648028052	NC_014364 Spirochaeta smaragdinae DSM 11293 chromosome, complete genome.	0	0	162864	0	0	0.00127009	162864	0.00044662
650716056	NC_015562 Methanotorris igneus Kol 5 chromosome, complete genome.	0	0	162864	0	0	0.00127009	162864	0.00044662
650716102	NC_015578 Treponema primitia ZAS-2 chromosome, complete genome.	0	0	162864	0	0	0.00127009	162864	0.00044662
651053067	CP001830 Sinorhizobium meliloti SM11, complete genome.	0	0	162864	0	0	0.00127009	162864	0.00044662
2506520007	Contig80 Serratia sp. AS9 : Contig80	0	0	162864	0	0	0.00127009	162864	0.00044662
2507262030	Amy39116DRAFT_AAE.1 Amycolatopsis sp. 75iv2, ATCC 39116 : Amy39116DRAFT_AAE.1	0	0	162864	0	0	0.00127009	162864	0.00044662
2508501110	EcthaDRAFT_EHB.1 Ectothiorhodospira haloalkaliphila Imhoff 51/7, ATCC 51935 : EcthaDRAFT_EHB.1	0	0	162864	0	0	0.00127009	162864	0.00044662
2516653075	METBUDRAFT_scaffold2.1 Methylomicrobium buryatense 5G : METBUDRAFT_scaffold2.1	0	0	162864	0	0	0.00127009	162864	0.00044662
2517093030	CP003557 Melioribacter roseus P3M : CP003557	0	0	162864	0	0	0.00127009	162864	0.00044662
2509276018	MescicDRAFT_scaffold_0.1 Mesorhizobium ciceri CMG6 : MescicDRAFT_scaffold_0.1	48922	111388	0	0.00040266	0.000969166	0	160310	0.000439616
2506783061	Desaci_Contig243.1 Desulfosporosinus acidophilus SJ4, DSM 22704 : Desaci_Contig243.1	48836	111294	0	0.000401952	0.000968348	0	160130	0.000439123
637000194	NC_007483 Nitrosococcus oceani ATCC 19707 plasmid A, complete sequence.	48834	111294	0	0.000401935	0.000968348	0	160128	0.000439117
637000204	NC_007498 Pelobacter carbinolicus DSM 2380, complete genome.	48834	111294	0	0.000401935	0.000968348	0	160128	0.000439117
646311917	NC_013739 Conexibacter woesei DSM 14684, complete genome.	48834	111294	0	0.000401935	0.000968348	0	160128	0.000439117
637000118	NC_006509 Geobacillus kaustophilus HTA426 plasmid pHTA426, complete sequence.	48834	0	108576	0.000401935	0	0.000846729	157410	0.000431664
637000335	NC_004603 Vibrio parahaemolyticus RIMD 2210633 chromosome I, complete sequence.	48834	0	108576	0.000401935	0	0.000846729	157410	0.000431664
640753033	NC_009654 Marinomonas sp. MWYL1, complete genome.	48834	0	108576	0.000401935	0	0.000846729	157410	0.000431664
640753057	NC_009616 Thermosipho melanesiensis BI429, complete genome.	48834	0	108576	0.000401935	0	0.000846729	157410	0.000431664
646564544	NC_013891 Listeria seeligeri serovar 1/2b str. SLCC3954, complete genome.	97666	0	54292	0.000803854	0	0.000423396	151958	0.000416713
648028006	NC_014318 Amycolatopsis mediterranei U32 chromosome, complete genome.	97666	0	54290	0.000803854	0	0.00042338	151956	0.000416707
637000268	NC_008042 Silicibacter sp. TM1040 plasmid unnamed, complete sequence.	0	148390	0	0	0.00129111	0	148390	0.000406928
643348539	NC_011769 Desulfovibrio vulgaris str. 'Miyazaki F', complete genome.	0	148390	0	0	0.00129111	0	148390	0.000406928
646564535	NC_014206 Geobacillus sp. C56-T3 chromosome, complete genome.	0	148390	0	0	0.00129111	0	148390	0.000406928
646564545	NC_013946 Meiothermus ruber DSM 1279 chromosome, complete genome.	0	148390	0	0	0.00129111	0	148390	0.000406928
638154510	AE000666 Methanobacterium thermoautotrophicum str. Delta H complete genome.	146498	0	0	0.00120577	0	0	146498	0.00040174
640753008	NC_009614 Bacteroides vulgatus ATCC 8482, complete genome.	146498	0	0	0.00120577	0	0	146498	0.00040174
640753055	NC_009785 Streptococcus gordonii str. Challis substr. CH1, complete genome.	146498	0	0	0.00120577	0	0	146498	0.00040174
646311914	NC_013315 Clostridium difficile CD196, complete genome.	146498	0	0	0.00120577	0	0	146498	0.00040174
648028039	NC_014253 Methanohalobium evestigatum Z-7303 chromosome, complete genome.	146498	0	0	0.00120577	0	0	146498	0.00040174
648231701	CP001900 Campylobacter jejuni subsp. jejuni M1, complete genome.	146498	0	0	0.00120577	0	0	146498	0.00040174
2505119042	NC_015681 Thermodesulfatator indicus CIR29812, DSM 15286 : Contig162	0	37100	108576	0	0.0003228	0.000846729	145676	0.000399486
2509601008	Metho_Contig141.1 Methanomethylovorans hollandica DSM 15978 : Metho_Contig141.1	0	37100	108576	0	0.0003228	0.000846729	145676	0.000399486
2504756004	Contig327 Haliscomenobacter hydrossis O, DSM 1100 : Contig327	48836	37100	54294	0.000401952	0.0003228	0.000423411	140230	0.000384551
640753030	NC_009659 Janthinobacterium sp. Marseille, complete genome.	48834	37100	54290	0.000401935	0.0003228	0.00042338	140224	0.000384535
642555122	NC_010831 Chlorobium phaeobacteroides BS1, complete genome.	48834	37100	54290	0.000401935	0.0003228	0.00042338	140224	0.000384535
644736398	NC_013061 Pedobacter heparinus DSM 2366, complete genome.	48834	37100	54290	0.000401935	0.0003228	0.00042338	140224	0.000384535
646311965	NC_013520 Veillonella parvula DSM 2008, complete genome.	48834	37100	54290	0.000401935	0.0003228	0.00042338	140224	0.000384535
646564556	NC_013958 Nitrosococcus halophilus Nc4 plasmid pNHAL01, complete sequence.	48834	37100	54290	0.000401935	0.0003228	0.00042338	140224	0.000384535
649633017	NC_015052 Bifidobacterium longum subsp. infantis 157F, complete genome.	48834	37100	54290	0.000401935	0.0003228	0.00042338	140224	0.000384535
2506381024	Contig118 Caldithrix abyssi LF13, DSM 13497 : Contig118	48834	37100	54290	0.000401935	0.0003228	0.00042338	140224	0.000384535
2512564044	NC_016938 Melissococcus plutonius DAT561 : NC_016938	48834	37100	54290	0.000401935	0.0003228	0.00042338	140224	0.000384535
2515154154	B092DRAFT_scaffold_0.1 Oligella ureolytica DSM 18253 : B092DRAFT_scaffold_0.1	97770	37192	0	0.00080471	0.0003236	0	134962	0.000370105
650716107	NC_015709 Zymomonas mobilis subsp. pomaceae ATCC 29192 chromosome, complete genome.	97668	37102	0	0.000803871	0.000322817	0	134770	0.000369578
641522606	NC_010578 Beijerinckia indica subsp. indica ATCC 9039 plasmid pBIND02, complete sequence.	97668	37100	0	0.000803871	0.0003228	0	134768	0.000369573
2508501111	Haur_641228502 Herpetosiphon aurantiacus DSM 785 : Haur_641228502	97666	37102	0	0.000803854	0.000322817	0	134768	0.000369573
637000219	NC_008027 Pseudomonas entomophila L48, complete genome.	97666	37100	0	0.000803854	0.0003228	0	134766	0.000369567
638154522	BA000011 Thermoplasma volcanium GSS1 DNA, complete genome.	97666	37100	0	0.000803854	0.0003228	0	134766	0.000369567
644736410	NC_012997 Teredinibacter turnerae T7901, complete genome.	97666	37100	0	0.000803854	0.0003228	0	134766	0.000369567
648028015	NC_014497 Candidatus Zinderia insecticola CARI chromosome, complete genome.	97666	37100	0	0.000803854	0.0003228	0	134766	0.000369567
650377970	FP929055 Ruminococcus torques L2-14 draft genome.	97666	37100	0	0.000803854	0.0003228	0	134766	0.000369567
2511231162	CP003046 Rhodospirillum rubrum F11 : CP003046	97666	37100	0	0.000803854	0.0003228	0	134766	0.000369567
643348513	NC_011772 Bacillus cereus G9842, complete genome.	0	74198	54360	0	0.000645583	0.000423926	128558	0.000352543
638154506	BX950229 Methanococcus maripaludis strain S2, complete sequence.	0	74196	54352	0	0.000645565	0.000423864	128548	0.000352516
648028048	NC_014483 Paenibacillus polymyxa E681 chromosome, complete genome.	0	74196	54312	0	0.000645565	0.000423552	128508	0.000352406
643348562	NC_011995 Macrococcus caseolyticus JCSC5402 plasmid pMCCL1, complete sequence.	0	74202	54290	0	0.000645617	0.00042338	128492	0.000352362
650716047	NC_015598 Lactobacillus kefiranofaciens ZW3 plasmid pWW1, complete sequence.	0	74198	54290	0	0.000645583	0.00042338	128488	0.000352351
642555113	NC_010676 Burkholderia phytofirmans PsJN chromosome 2, complete sequence.	0	74196	54290	0	0.000645565	0.00042338	128486	0.000352346
650377986	CP002455 Weeksella virosa DSM 16922, complete genome.	0	74196	54290	0	0.000645565	0.00042338	128486	0.000352346
2509601042	JiagaDRAFT_JGA.1 Jiangella gansuensis YIM 002, DSM 44835 : JiagaDRAFT_JGA.1	0	74196	54290	0	0.000645565	0.00042338	128486	0.000352346
2511231049	AdhaqDRAFT_Scaffold4.1 Adhaeribacter aquaticus MBRG1.5, DSM 16391 : AdhaqDRAFT_Scaffold4.1	0	74196	54290	0	0.000645565	0.00042338	128486	0.000352346
2511231077	NC_016630 Filifactor alocis ATCC 35896 : NC_016630	0	74196	54290	0	0.000645565	0.00042338	128486	0.000352346
2517287021	A379DRAFT_chromosome1.1 Thiomicrospira sp. KP2 : A379DRAFT_chromosome1.1	0	74196	54290	0	0.000645565	0.00042338	128486	0.000352346
647000209	NZ_ACJX02000001 Anaerobaculum hydrogeniformans ATCC BAA-1850 A_SpOS1-1.0.1_Cont0.1, whole genome shotgun sequence.	48878	74234	0	0.000402297	0.000645896	0	123112	0.000337609
2509276023	AlkimDRAFT_AIB.1 Alkaliflexus imshenetskii Z-7010, DSM 15055 : AlkimDRAFT_AIB.1	48838	74200	0	0.000401968	0.0006456	0	123038	0.000337406
639633037	NC_008738 Marinobacter aquaeolei VT8 plasmid pMAQU01, complete sequence.	48836	74196	0	0.000401952	0.000645565	0	123032	0.000337389
637000235	NC_007901 Rhodoferax ferrireducens T118 plasmid1, complete sequence.	48834	74196	0	0.000401935	0.000645565	0	123030	0.000337384
643692035	NC_012124 Salmonella enterica subsp. enterica serovar Paratyphi C strain RKS4594 plasmid pSPCV, complete sequence.	48834	74196	0	0.000401935	0.000645565	0	123030	0.000337384
648028060	NC_014410 Thermoanaerobacterium thermosaccharolyticum DSM 571 chromosome, complete genome.	48834	74196	0	0.000401935	0.000645565	0	123030	0.000337384
650377969	FP929052 Ruminococcus sp. 18P13 draft genome.	48834	74196	0	0.000401935	0.000645565	0	123030	0.000337384
650716082	NC_015866 Rickettsia heilongjiangensis 054 chromosome, complete genome.	48834	74196	0	0.000401935	0.000645565	0	123030	0.000337384
2512047088	SalpaDRAFT_Scaffold2.1 Sporomusa sp. KB1 : SalpaDRAFT_Scaffold2.1	48834	74196	0	0.000401935	0.000645565	0	123030	0.000337384
2510065088	CarfeDRAFT_scaffold_0.1 Carboxydothermus ferrireducens DSM 11255 : CarfeDRAFT_scaffold_0.1	0	111342	0	0	0.000968765	0	111342	0.000305332
649633081	NC_014837 Pantoea sp. At-9b chromosome, complete genome.	0	111300	0	0	0.0009684	0	111300	0.000305217
637000230	NC_007971 Ralstonia metallidurans CH34 plasmid 1, complete sequence.	0	111298	0	0	0.000968383	0	111298	0.000305211
2517093010	GemroDRAFT_scaffold1.1 Geminicoccus roseus DSM 18922 : GemroDRAFT_scaffold1.1	0	111298	0	0	0.000968383	0	111298	0.000305211
649633002	NC_015057 Acidobacterium sp. MP5ACTX9 plasmid pACIX901, complete sequence.	0	111296	0	0	0.000968365	0	111296	0.000305206
637000166	NC_002977 Methylococcus capsulatus str. Bath, complete genome.	0	111294	0	0	0.000968348	0	111294	0.0003052
641228480	NC_010103 Brucella canis ATCC 23365 chromosome I, complete sequence.	0	111294	0	0	0.000968348	0	111294	0.0003052
641522610	NC_010424 Candidatus Desulforudis audaxviator MP104C, complete genome.	0	111294	0	0	0.000968348	0	111294	0.0003052
644736334	NC_012751 Candidatus Hamiltonella defensa 5AT (Acyrthosiphon pisum), complete genome.	0	111294	0	0	0.000968348	0	111294	0.0003052
646564583	NC_014160 Thermosphaera aggregans DSM 11486 chromosome, complete genome.	0	111294	0	0	0.000968348	0	111294	0.0003052
646862338	CP001584 Rickettsia prowazekii Rp22, complete genome.	0	111294	0	0	0.000968348	0	111294	0.0003052
648028035	NC_014471 Ignisphaera aggregans DSM 17230 chromosome, complete genome.	0	111294	0	0	0.000968348	0	111294	0.0003052
649633084	NC_014215 Propionibacterium freudenreichii subsp. shermanii CIRM-BIA1, complete genome.	0	111294	0	0	0.000968348	0	111294	0.0003052
2507149014	Ferpe_Contig798.1 Fervidobacterium pennivorans Ven5, DSM 9078 : Ferpe_Contig798.1	0	111294	0	0	0.000968348	0	111294	0.0003052
640753056	NC_009663 Sulfurovum sp. NBC37-1, complete genome.	0	0	108592	0	0	0.000846854	108592	0.000297791
646564578	NC_014152 Thermincola sp. JR, complete genome.	0	0	108586	0	0	0.000846807	108586	0.000297774
637000304	NC_003155 Streptomyces avermitilis MA-4680, complete genome.	0	0	108580	0	0	0.000846761	108580	0.000297758
2516653049	SpopoDRAFT_scaffold1.1 Sporichthya polymorpha DSM 43042 : SpopoDRAFT_scaffold1.1	0	0	108580	0	0	0.000846761	108580	0.000297758
2516493030	NitteDRAFT_scaffold1.1 Nitratiruptor tergarcus DSM 16512 : NitteDRAFT_scaffold1.1	0	0	108578	0	0	0.000846745	108578	0.000297752
637000271	NC_008036 Sphingopyxis alaskensis RB2256 F plasmid, complete sequence.	0	0	108576	0	0	0.000846729	108576	0.000297747
638154503	AY596297 Haloarcula marismortui ATCC 43049 chromosome I, complete sequence.	0	0	108576	0	0	0.000846729	108576	0.000297747
639633025	NC_008571 Gramella forsetii KT0803, complete genome.	0	0	108576	0	0	0.000846729	108576	0.000297747
639633056	NC_008209 Roseobacter denitrificans OCh 114, complete genome.	0	0	108576	0	0	0.000846729	108576	0.000297747
640427108	NC_009478 Clavibacter michiganensis subsp. michiganensis NCPPB 382 plasmid pCM1, complete sequence.	0	0	108576	0	0	0.000846729	108576	0.000297747
640753029	NC_009776 Ignicoccus hospitalis KIN4/I, complete genome.	0	0	108576	0	0	0.000846729	108576	0.000297747
641522628	NC_010331 Francisella philomiragia subsp. philomiragia ATCC 25017 plasmid pFPHI01, complete sequence.	0	0	108576	0	0	0.000846729	108576	0.000297747
643692050	NC_012438 Sulfurihydrogenibium azorense Az-Fu1, complete genome.	0	0	108576	0	0	0.000846729	108576	0.000297747
644736344	NC_010280 Chlamydia trachomatis L2b/UCH-1/proctitis, complete genome.	0	0	108576	0	0	0.000846729	108576	0.000297747
644736385	NC_013156 Methanocaldococcus fervens AG86, complete genome.	0	0	108576	0	0	0.000846729	108576	0.000297747
646311945	NC_013665 Methanocella paludicola SANAE, complete genome.	0	0	108576	0	0	0.000846729	108576	0.000297747
646564542	NC_014125 Legionella pneumophila 2300/99 Alcoy chromosome, complete genome.	0	0	108576	0	0	0.000846729	108576	0.000297747
649633094	NC_014824 Ruminococcus albus 7 plasmid pRUMAL01, complete sequence.	0	0	108576	0	0	0.000846729	108576	0.000297747
650377909	FQ312005 Bacteriovorax marinus SJ genome.	0	0	108576	0	0	0.000846729	108576	0.000297747
650716014	NC_014718 Burkholderia rhizoxinica HKI 454 chromosome, complete genome.	0	0	108576	0	0	0.000846729	108576	0.000297747
2503692001	Doleo_NC_009943 Desulfococcus oleovorans Hxd3 : Doleo_NC_009943	0	0	108576	0	0	0.000846729	108576	0.000297747
2508501017	HAI_scaffold00004.1 Haloarcula sinaiiensis ATCC 33800 : HAI_scaffold00004.1	0	0	108576	0	0	0.000846729	108576	0.000297747
2510917037	CycpuDRAFT_scaffold_0.1 Cycloclasticus pugetii PS-1 : CycpuDRAFT_scaffold_0.1	0	0	108576	0	0	0.000846729	108576	0.000297747
2511231120	NC_016775 Brucella suis VBI22 : NC_016775	0	0	108576	0	0	0.000846729	108576	0.000297747
2511231180	CP002927 Bacillus amyloliquefaciens XH7 : CP002927	0	0	108576	0	0	0.000846729	108576	0.000297747
2513237213	NC_017068 Selenomonas ruminantium lactilytica TAM6421 : NC_017068	0	0	108576	0	0	0.000846729	108576	0.000297747
2515154079	B038DRAFT_scaffold_0.1 Martelella mediterranea DSM 17316 : B038DRAFT_scaffold_0.1	0	0	108576	0	0	0.000846729	108576	0.000297747
2515154190	A37WDRAFT_scaffold_0.1 Wenxinia marina DSM 24838 : A37WDRAFT_scaffold_0.1	0	0	108576	0	0	0.000846729	108576	0.000297747
637000330	NC_004551 Tropheryma whipplei TW08/27, complete genome.	48834	0	54298	0.000401935	0	0.000423443	103132	0.000282818
650716105	NC_015756 Weissella koreensis KACC 15510 plasmid WKp2903, complete sequence.	48834	0	54294	0.000401935	0	0.000423411	103128	0.000282807
637000132	NC_000915 Helicobacter pylori 26695, complete genome.	48834	0	54292	0.000401935	0	0.000423396	103126	0.000282801
637000192	NC_007959 Nitrobacter hamburgensis X14 plasmid 1, complete sequence.	48836	0	54290	0.000401952	0	0.00042338	103126	0.000282801
646564582	NC_013894 Thermocrinis albus DSM 14484 chromosome, complete genome.	48834	0	54292	0.000401935	0	0.000423396	103126	0.000282801
640753004	NC_009850 Arcobacter butzleri RM4018, complete genome.	48834	0	54290	0.000401935	0	0.00042338	103124	0.000282796
640753052	NC_009619 Staphylococcus aureus subsp. aureus JH1 plasmid pSJH101, complete sequence.	48834	0	54290	0.000401935	0	0.00042338	103124	0.000282796
643348586	NC_011374 Ureaplasma urealyticum serovar 10 str. ATCC 33699, complete genome.	48834	0	54290	0.000401935	0	0.00042338	103124	0.000282796
649633030	NC_014355 Candidatus Nitrospira defluvii, complete genome.	48834	0	54290	0.000401935	0	0.00042338	103124	0.000282796
650377943	FP929047 Gordonibacter pamelaeae 7-10-1-b draft genome.	48834	0	54290	0.000401935	0	0.00042338	103124	0.000282796
650377966	FP929051 Ruminococcus bromii L2-63 draft genome.	48834	0	54290	0.000401935	0	0.00042338	103124	0.000282796
650716090	NC_015558 Streptococcus parauberis KCTC 11537 chromosome, complete genome.	48834	0	54290	0.000401935	0	0.00042338	103124	0.000282796
2508501120	Marpi_Contig565.1 Marinitoga piezophila KA3 : Marpi_Contig565.1	48834	0	54290	0.000401935	0	0.00042338	103124	0.000282796
2516493036	bg20_gi367466342.1 Marine archaeal group 1 BG20 (Nitrosoarchaeum limnia BG20) : bg20_gi367466342.1	97928	0	0	0.00080601	0	0	97928	0.000268547
646564543	NC_014131 Leuconostoc kimchii IMSNU11154 plasmid LkipL4701, complete sequence.	97672	0	0	0.000803903	0	0	97672	0.000267845
2505679030	Contig865 Runella slithyformis LSU4, DSM 19594 : Contig865	97672	0	0	0.000803903	0	0	97672	0.000267845
643348524	NC_011561 Candidatus Azobacteroides pseudotrichonymphae genomovar. CFP2 plasmid pCFPG2, complete sequence.	97670	0	0	0.000803887	0	0	97670	0.000267839
2516653084	SphmeDRAFT_contig1.1 Sphingomonas melonis C3 : SphmeDRAFT_contig1.1	97668	0	0	0.000803871	0	0	97668	0.000267834
637000144	NC_002662 Lactococcus lactis subsp. lactis Il1403, complete genome.	97666	0	0	0.000803854	0	0	97666	0.000267828
638154517	CP000077 Sulfolobus acidocaldarius DSM 639, complete genome.	97666	0	0	0.000803854	0	0	97666	0.000267828
640753039	NC_009615 Parabacteroides distasonis ATCC 8503, complete genome.	97666	0	0	0.000803854	0	0	97666	0.000267828
642555127	NC_010644 Elusimicrobium minutum Pei191, complete genome.	97666	0	0	0.000803854	0	0	97666	0.000267828
642555143	NC_011034 Neisseria gonorrhoeae NCCP11945 plasmid pNGK, complete sequence.	97666	0	0	0.000803854	0	0	97666	0.000267828
643692011	NC_012491 Brevibacillus brevis NBRC 100599, complete genome.	97666	0	0	0.000803854	0	0	97666	0.000267828
644736368	NC_013062 Flavobacteriaceae bacterium 3519-10, complete genome.	97666	0	0	0.000803854	0	0	97666	0.000267828
644736376	NC_013174 Jonesia denitrificans DSM 20603, complete genome.	97666	0	0	0.000803854	0	0	97666	0.000267828
646564561	NC_014039 Propionibacterium acnes SK137 chromosome, complete genome.	97666	0	0	0.000803854	0	0	97666	0.000267828
646564568	NC_014012 Shewanella violacea DSS12, complete genome.	97666	0	0	0.000803854	0	0	97666	0.000267828
649633101	NC_014831 Thermaerobacter marianensis DSM 12885 chromosome, complete genome.	97666	0	0	0.000803854	0	0	97666	0.000267828
650716071	NC_015702 Parachlamydia acanthamoebae UV7, complete genome.	97666	0	0	0.000803854	0	0	97666	0.000267828
2504756083	Contig64 Halanaerobium sp. sapolanicus : Contig64	97666	0	0	0.000803854	0	0	97666	0.000267828
2512564079	CP003388 Riemerella anatipestifer A350/72, DSM 15868 : CP003388	97666	0	0	0.000803854	0	0	97666	0.000267828
2515154118	A39ODRAFT_scaffold_0.1 Lamprocystis purpurea DSM 4197 : A39ODRAFT_scaffold_0.1	0	37298	54290	0	0.000324523	0.00042338	91588	0.000251161
2515154140	A3ESDRAFT_scaffold_0.1 Kribbella catacumbae DSM 19601 : A3ESDRAFT_scaffold_0.1	0	37238	54290	0	0.000324001	0.00042338	91528	0.000250996
2515154196	B161DRAFT_scaffold_0.1 Meganema perideroedes DSM 15528 : B161DRAFT_scaffold_0.1	0	37116	54290	0	0.000322939	0.00042338	91406	0.000250662
2509276064	Deiho_Contig198.1 Deinococcus hopiensis KR-140, DSM 18049 : Deiho_Contig198.1	0	37112	54290	0	0.000322904	0.00042338	91402	0.000250651
650716029	NC_015673 Corynebacterium resistens DSM 45100 chromosome, complete genome.	0	37100	54296	0	0.0003228	0.000423427	91396	0.000250634
2509601020	RikmiDRAFT_RMD.1 Rikenella microfusus Q-1, DSM 15922 : RikmiDRAFT_RMD.1	0	37100	54296	0	0.0003228	0.000423427	91396	0.000250634
2517287024	NATTIDRAFT_scaffold1.1 Natronorubrum tibetense DSM 13204 : NATTIDRAFT_scaffold1.1	0	37104	54290	0	0.000322835	0.00042338	91394	0.000250629
638154515	AE009950 Pyrococcus furiosus DSM 3638, complete genome.	0	37100	54292	0	0.0003228	0.000423396	91392	0.000250623
639633050	NC_008607 Pelobacter propionicus DSM 2379 plasmid pPRO1, complete sequence.	0	37102	54290	0	0.000322817	0.00042338	91392	0.000250623
649633022	NC_014652 Caldicellulosiruptor hydrothermalis 108 chromosome, complete genome.	0	37100	54292	0	0.0003228	0.000423396	91392	0.000250623
649633032	NC_015167 Cellulophaga lytica DSM 7489 chromosome, complete genome.	0	37100	54292	0	0.0003228	0.000423396	91392	0.000250623
649633088	NC_015061 Rahnella sp. Y9602 chromosome, complete genome.	0	37102	54290	0	0.000322817	0.00042338	91392	0.000250623
637000120	NC_002939 Geobacter sulfurreducens PCA, complete genome.	0	37100	54290	0	0.0003228	0.00042338	91390	0.000250618
640427144	NC_009507 Sphingomonas wittichii RW1 plasmid pSWIT01, complete sequence.	0	37100	54290	0	0.0003228	0.00042338	91390	0.000250618
641228489	NC_010002 Delftia acidovorans SPH-1, complete genome.	0	37100	54290	0	0.0003228	0.00042338	91390	0.000250618
641228498	NC_010120 Neisseria meningitidis 053442, complete genome.	0	37100	54290	0	0.0003228	0.00042338	91390	0.000250618
643348501	NC_011761 Acidithiobacillus ferrooxidans ATCC 23270, complete genome.	0	37100	54290	0	0.0003228	0.00042338	91390	0.000250618
643348530	NC_011295 Coprothermobacter proteolyticus DSM 5265, complete genome.	0	37100	54290	0	0.0003228	0.00042338	91390	0.000250618
643348584	NC_011978 Thermotoga neapolitana DSM 4359, complete genome.	0	37100	54290	0	0.0003228	0.00042338	91390	0.000250618
646311935	NC_013422 Halothiobacillus neapolitanus c2, complete genome.	0	37100	54290	0	0.0003228	0.00042338	91390	0.000250618
649633085	NC_014800 Pseudoalteromonas sp. SM9913 chromosome chromosome II, complete sequence.	0	37100	54290	0	0.0003228	0.00042338	91390	0.000250618
650716098	NC_015315 Thermoproteus uzoniensis 768-20 chromosome, complete genome.	0	37100	54290	0	0.0003228	0.00042338	91390	0.000250618
2502790015	Apau_unknown Aminomonas paucivorans GLU-3, DSM 12260 : Apau_unknown	0	37100	54290	0	0.0003228	0.00042338	91390	0.000250618
2504136012	AMB_SN2 Alteromonas taeanensis SN2 : AMB_SN2	0	37100	54290	0	0.0003228	0.00042338	91390	0.000250618
2505679008	Contig44 Flexistipes sinusarabici MAS10, DSM 4947 : Contig44	0	37100	54290	0	0.0003228	0.00042338	91390	0.000250618
2506520012	Contig509 Thermodesulfobacterium sp. OPB45 : Contig509	0	37100	54290	0	0.0003228	0.00042338	91390	0.000250618
2508501098	Oweho_Contig158.1 Owenweeksia hongkongensis DSM 17368 : Oweho_Contig158.1	0	37100	54290	0	0.0003228	0.00042338	91390	0.000250618
2509601001	Ornrh_Contig157.1 Ornithobacterium rhinotracheale DSM 15997 : Ornrh_Contig157.1	0	37100	54290	0	0.0003228	0.00042338	91390	0.000250618
2511231159	HE577054 Paenibacillus polymyxa M1 : HE577054	0	37100	54290	0	0.0003228	0.00042338	91390	0.000250618
643692013	NC_012718 Burkholderia glumae BGR1 plasmid bglu_2p, complete sequence.	48838	37108	0	0.000401968	0.00032287	0	85946	0.000235689
2516653083	LeiaqDRAFT_scaffold1.1 Leisingera aquimarina DSM 24565 : LeiaqDRAFT_scaffold1.1	48840	37106	0	0.000401985	0.000322852	0	85946	0.000235689
2509601041	FlemaDRAFT_FME.1 Flectobacillus major VKMB-859, DSM 103 : FlemaDRAFT_FME.1	48838	37104	0	0.000401968	0.000322835	0	85942	0.000235678
2509276036	ThisiDRAFT_Contig1.1 Thiorhodospira sibirica A12, ATCC 700588 : ThisiDRAFT_Contig1.1	48836	37104	0	0.000401952	0.000322835	0	85940	0.000235672
650716069	NC_011386 Oligotropha carboxidovorans OM5, complete genome.	48836	37102	0	0.000401952	0.000322817	0	85938	0.000235667
641522608	NC_010551 Burkholderia ambifaria MC40-6 chromosome 1, complete sequence.	48836	37100	0	0.000401952	0.0003228	0	85936	0.000235661
643692009	NC_006128 Borrelia garinii PBi plasmid cp26, complete sequence.	48834	37102	0	0.000401935	0.000322817	0	85936	0.000235661
637000224	NC_007005 Pseudomonas syringae pv. syringae B728a, complete genome.	48834	37100	0	0.000401935	0.0003228	0	85934	0.000235656
637000325	NC_007520 Thiomicrospira crunogena XCL-2, complete genome.	48834	37100	0	0.000401935	0.0003228	0	85934	0.000235656
640427150	NC_009486 Thermotoga petrophila RKU-1, complete genome.	48834	37100	0	0.000401935	0.0003228	0	85934	0.000235656
640753047	NC_009767 Roseiflexus castenholzii DSM 13941, complete genome.	48834	37100	0	0.000401935	0.0003228	0	85934	0.000235656
642555120	NC_011027 Chlorobaculum parvum NCIB 8327, complete genome.	48834	37100	0	0.000401935	0.0003228	0	85934	0.000235656
642555170	NC_010717 Xanthomonas oryzae pv. oryzae PXO99A, complete genome.	48834	37100	0	0.000401935	0.0003228	0	85934	0.000235656
643348540	NC_011766 Desulfurococcus kamchatkensis 1221n, complete genome.	48834	37100	0	0.000401935	0.0003228	0	85934	0.000235656
643348571	NC_011420 Rhodospirillum centenum SW, complete genome.	48834	37100	0	0.000401935	0.0003228	0	85934	0.000235656
644736327	NC_013203 Atopobium parvulum DSM 20469, complete genome.	48834	37100	0	0.000401935	0.0003228	0	85934	0.000235656
644736328	NC_012846 Bartonella grahamii as4aup, complete genome.	48834	37100	0	0.000401935	0.0003228	0	85934	0.000235656
645058871	NZ_AAUJ02000001 Comamonas testosteroni KF-1, whole genome shotgun sequence.	48834	37100	0	0.000401935	0.0003228	0	85934	0.000235656
646311958	NC_013595 Streptosporangium roseum DSM 43021, complete genome.	48834	37100	0	0.000401935	0.0003228	0	85934	0.000235656
646311960	NC_013512 Sulfurospirillum deleyianum DSM 6946, complete genome.	48834	37100	0	0.000401935	0.0003228	0	85934	0.000235656
646564517	NC_013962 Candidatus Riesia pediculicola USDA plasmid pPAN, complete sequence.	48834	37100	0	0.000401935	0.0003228	0	85934	0.000235656
650716042	NC_015717 Hyphomicrobium sp. MC1, complete genome.	48834	37100	0	0.000401935	0.0003228	0	85934	0.000235656
650716057	NC_015125 Microbacterium testaceum StLB037, complete genome.	48834	37100	0	0.000401935	0.0003228	0	85934	0.000235656
650716060	NC_015848 Mycobacterium canettii CIPT 140010059, complete genome.	48834	37100	0	0.000401935	0.0003228	0	85934	0.000235656
650716103	NC_015409 Verrucosispora maris AB-18-032 plasmid pVMKU, complete sequence.	48834	37100	0	0.000401935	0.0003228	0	85934	0.000235656
2515154027	A37SDRAFT_scaffold_0.1 Olivibacter sitiensis DSM 17696 : A37SDRAFT_scaffold_0.1	0	74304	0	0	0.000646505	0	74304	0.000203763
2515154060	MET2598DRAFT_Contig244.1 Methylobacterium sp. WSM2598 : MET2598DRAFT_Contig244.1	0	74284	0	0	0.000646331	0	74284	0.000203708
2513237154	A3KSDRAFT_scaffold_0.1 Acetobacterium dehalogenans DSM 11527 : A3KSDRAFT_scaffold_0.1	0	74274	0	0	0.000646244	0	74274	0.000203681
2515154015	A3CODRAFT_scaffold_0.1 Actinomycetospora chiangmaiensis DSM 45062 : A3CODRAFT_scaffold_0.1	0	74224	0	0	0.000645809	0	74224	0.000203544
2515154081	B047DRAFT_scaffold_0.1 Meiothermus timidus DSM 17022 : B047DRAFT_scaffold_0.1	0	74212	0	0	0.000645704	0	74212	0.000203511
2515154083	B050DRAFT_scaffold_0.1 Echinicola pacifica DSM 19836 : B050DRAFT_scaffold_0.1	0	74210	0	0	0.000645687	0	74210	0.000203505
641228491	NC_009952 Dinoroseobacter shibae DFL 12, complete genome.	0	74200	0	0	0.0006456	0	74200	0.000203478
646862321	FN392235 Erwinia pyrifoliae DSM 12163 complete genome, culture collection DSM:12163.	0	74200	0	0	0.0006456	0	74200	0.000203478
637000092	NC_000958 Deinococcus radiodurans R1 plasmid MP1, complete sequence.	0	74198	0	0	0.000645583	0	74198	0.000203472
637000334	NC_006840 Vibrio fischeri ES114 chromosome I, complete sequence.	0	74198	0	0	0.000645583	0	74198	0.000203472
646564546	NC_014212 Meiothermus silvanus DSM 9946 chromosome, complete genome.	0	74198	0	0	0.000645583	0	74198	0.000203472
637000002	NC_005966 Acinetobacter sp. ADP1, complete genome.	0	74196	0	0	0.000645565	0	74196	0.000203467
637000067	NC_007899 Chlamydophila felis Fe/C-56, complete genome.	0	74196	0	0	0.000645565	0	74196	0.000203467
637000242	NC_007940 Rickettsia bellii RML369-C, complete genome.	0	74196	0	0	0.000645565	0	74196	0.000203467
637000257	NC_008345 Shewanella frigidimarina NCIMB 400, complete genome.	0	74196	0	0	0.000645565	0	74196	0.000203467
637000306	NC_006177 Symbiobacterium thermophilum IAM 14863, complete genome.	0	74196	0	0	0.000645565	0	74196	0.000203467
637000341	NC_005090 Wolinella succinogenes DSM 1740, complete genome.	0	74196	0	0	0.000645565	0	74196	0.000203467
638154507	AE009439 Methanopyrus kandleri AV19, complete genome.	0	74196	0	0	0.000645565	0	74196	0.000203467
638154513	AE009441 Pyrobaculum aerophilum strain IM2 complete genome.	0	74196	0	0	0.000645565	0	74196	0.000203467
640427117	NC_009567 Haemophilus influenzae PittGG, complete genome.	0	74196	0	0	0.000645565	0	74196	0.000203467
640753043	NC_009881 Rickettsia akari str. Hartford, complete genome.	0	74196	0	0	0.000645565	0	74196	0.000203467
641228497	NC_010172 Methylobacterium extorquens PA1, complete genome.	0	74196	0	0	0.000645565	0	74196	0.000203467
641522611	NC_010482 Candidatus Korarchaeum cryptofilum OPF8, complete genome.	0	74196	0	0	0.000645565	0	74196	0.000203467
641522612	NC_010333 Caulobacter sp. K31 plasmid pCAUL02, complete sequence.	0	74196	0	0	0.000645565	0	74196	0.000203467
641522635	NC_010524 Leptothrix cholodnii SP-6, complete genome.	0	74196	0	0	0.000645565	0	74196	0.000203467
641522649	NC_010506 Shewanella woodyi ATCC 51908, complete genome.	0	74196	0	0	0.000645565	0	74196	0.000203467
642555147	NC_011143 Phenylobacterium zucineum HLK1 plasmid unnamed, complete sequence.	0	74196	0	0	0.000645565	0	74196	0.000203467
642555168	NC_010981 Wolbachia pipientis, complete genome.	0	74196	0	0	0.000645565	0	74196	0.000203467
643348566	NC_011896 Mycobacterium leprae Br4923, complete genome.	0	74196	0	0	0.000645565	0	74196	0.000203467
646311966	NC_013456 Vibrio sp. Ex25 chromosome 1, complete genome.	0	74196	0	0	0.000645565	0	74196	0.000203467
646564521	NC_013895 Clostridiales genomosp. BVAB3 str. UPII9-5 chromosome, complete genome.	0	74196	0	0	0.000645565	0	74196	0.000203467
646564550	NC_014002 Methanohalophilus mahii DSM 5219 chromosome, complete genome.	0	74196	0	0	0.000645565	0	74196	0.000203467
646564554	NC_014014 Mycoplasma crocodyli MP145 chromosome, complete genome.	0	74196	0	0	0.000645565	0	74196	0.000203467
646862347	CP001800 Sulfolobus solfataricus 98/2, complete genome.	0	74196	0	0	0.000645565	0	74196	0.000203467
648028005	NC_013416 Aggregatibacter actinomycetemcomitans D11S-1 chromosome, complete genome.	0	74196	0	0	0.000645565	0	74196	0.000203467
648028033	NC_014323 Herbaspirillum seropedicae SmR1 chromosome, complete genome.	0	74196	0	0	0.000645565	0	74196	0.000203467
648231702	CP001809 Corynebacterium pseudotuberculosis 1002, complete genome.	0	74196	0	0	0.000645565	0	74196	0.000203467
649633023	NC_014719 Caldicellulosiruptor kristjanssonii 177R1B plasmid pCALKR01, complete sequence.	0	74196	0	0	0.000645565	0	74196	0.000203467
649633066	NC_014918 Mesorhizobium ciceri biovar biserrulae WSM1271 plasmid pMESCI01, complete sequence.	0	74196	0	0	0.000645565	0	74196	0.000203467
649633073	NC_014970 Mycoplasma haemofelis str. Langford 1, complete genome.	0	74196	0	0	0.000645565	0	74196	0.000203467
649633096	NC_014623 Stigmatella aurantiaca DW4/3-1 chromosome, complete genome.	0	74196	0	0	0.000645565	0	74196	0.000203467
650377941	FP929045 Faecalibacterium prausnitzii L2/6 draft genome.	0	74196	0	0	0.000645565	0	74196	0.000203467
650377958	FP929048 Megamonas hypermegale ART12/1 draft genome.	0	74196	0	0	0.000645565	0	74196	0.000203467
650716010	NC_015634 Bacillus coagulans 2-6 chromosome, complete genome.	0	74196	0	0	0.000645565	0	74196	0.000203467
650716050	NC_015516 Melissococcus plutonius ATCC 35311, complete genome.	0	74196	0	0	0.000645565	0	74196	0.000203467
2501799900	Cmue_unknown Candidatus Sulcia muelleri Dm : Cmue_unknown	0	74196	0	0	0.000645565	0	74196	0.000203467
2506210003	Contig78 Marinomonas posidonica IVIA-Po-181 : Contig78	0	74196	0	0	0.000645565	0	74196	0.000203467
2508501051	Thivi_Contig117.1 Thiocystis violascens 611, DSM 198 : Thivi_Contig117.1	0	74196	0	0	0.000645565	0	74196	0.000203467
2509276026	JoomaDRAFT_JMA.1 Joostella marina En5, DSM 19592 : JoomaDRAFT_JMA.1	0	74196	0	0	0.000645565	0	74196	0.000203467
2511231055	NC_015974 Sphingobium sp. SYK-6 : NC_015974	0	74196	0	0	0.000645565	0	74196	0.000203467
2511231202	CP002874 Brachyspira intermedia PWS/A : CP002874	0	74196	0	0	0.000645565	0	74196	0.000203467
2512564035	NC_016937 Francisella tularensis TI0902 : NC_016937	0	74196	0	0	0.000645565	0	74196	0.000203467
2512875015	SacsacDRAFT_Scaffold1.1 Saccharibacillus sacchari GR21, DSM 19268 : SacsacDRAFT_Scaffold1.1	0	74196	0	0	0.000645565	0	74196	0.000203467
2513237177	NC_017461 Fervidicoccus fontis Kam940 : NC_017461	0	74196	0	0	0.000645565	0	74196	0.000203467
2517434012	A3M1DRAFT_scaffold1.1 Ancylobacter sp. FA202 : A3M1DRAFT_scaffold1.1	0	74196	0	0	0.000645565	0	74196	0.000203467
650716044	NC_015638 Lacinutrix sp. 5H-3-7-4 chromosome, complete genome.	0	0	54494	0	0	0.000424971	54494	0.000149438
646564511	NC_014098 Bacillus tusciae DSM 2912 chromosome, complete genome.	0	0	54380	0	0	0.000424082	54380	0.000149126
646311962	NC_013525 Thermobaculum terrenum ATCC BAA-798 chromosome 1, complete genome.	0	0	54334	0	0	0.000423723	54334	0.000149
2509276058	Belba_Contig708.1 Belliella baltica BA134, DSM 15883 : Belba_Contig708.1	0	0	54332	0	0	0.000423708	54332	0.000148994
650716040	NC_015497 Glaciecola sp. 4H-3-7+YE-5 chromosome, complete genome.	0	0	54330	0	0	0.000423692	54330	0.000148989
644736377	NC_013166 Kangiella koreensis DSM 16069, complete genome.	0	0	54328	0	0	0.000423677	54328	0.000148983
637000231	NC_003295 Ralstonia solanacearum GMI1000, complete genome.	0	0	54322	0	0	0.00042363	54322	0.000148967
641522647	NC_010263 Rickettsia rickettsii str. Iowa, complete genome.	0	0	54322	0	0	0.00042363	54322	0.000148967
641522655	NC_010321 Thermoanaerobacter pseudethanolicus ATCC 33223, complete genome.	0	0	54320	0	0	0.000423614	54320	0.000148961
637000302	NC_006449 Streptococcus thermophilus CNRZ1066, complete genome.	0	0	54316	0	0	0.000423583	54316	0.00014895
646564560	NC_014033 Prevotella ruminicola 23 chromosome, complete genome.	0	0	54310	0	0	0.000423536	54310	0.000148934
642555149	NC_011059 Prosthecochloris aestuarii DSM 271, complete genome.	0	0	54304	0	0	0.000423489	54304	0.000148917
637000019	NC_006582 Bacillus clausii KSM-K16, complete genome.	0	0	54298	0	0	0.000423443	54298	0.000148901
637000203	NC_002663 Pasteurella multocida subsp. multocida str. Pm70, complete genome.	0	0	54298	0	0	0.000423443	54298	0.000148901
640753042	NC_009656 Pseudomonas aeruginosa PA7, complete genome.	0	0	54298	0	0	0.000423443	54298	0.000148901
644736352	NC_012795 Desulfovibrio magneticus RS-1 plasmid pDMC2, complete sequence.	0	0	54298	0	0	0.000423443	54298	0.000148901
646564553	NC_013948 Mycoplasma agalactiae, complete genome.	0	0	54298	0	0	0.000423443	54298	0.000148901
637000027	NC_005956 Bartonella henselae str. Houston-1, complete genome.	0	0	54296	0	0	0.000423427	54296	0.000148895
637000243	NC_003103 Rickettsia conorii str. Malish 7, complete genome.	0	0	54296	0	0	0.000423427	54296	0.000148895
642555104	NC_010655 Akkermansia muciniphila ATCC BAA-835, complete genome.	0	0	54296	0	0	0.000423427	54296	0.000148895
637000025	NC_006297 Bacteroides fragilis YCH46 plasmid pBFY46, complete sequence.	0	0	54294	0	0	0.000423411	54294	0.00014889
646564576	NC_013929 Streptomyces scabiei 87.22, complete genome.	0	0	54294	0	0	0.000423411	54294	0.00014889
650377925	FP929038 Coprococcus catus GD/7 draft genome.	0	0	54294	0	0	0.000423411	54294	0.00014889
2512564028	NC_016945 Vibrio cholerae IEC224 : NC_016945	0	0	54294	0	0	0.000423411	54294	0.00014889
640427142	NC_007606 Shigella dysenteriae Sd197, complete genome.	0	0	54292	0	0	0.000423396	54292	0.000148884
641228499	NC_010085 Nitrosopumilus maritimus SCM1, complete genome.	0	0	54292	0	0	0.000423396	54292	0.000148884
642555132	NC_011126 Hydrogenobaculum sp. Y04AAS1, complete genome.	0	0	54292	0	0	0.000423396	54292	0.000148884
643348509	NC_011879 Arthrobacter chlorophenolicus A6 plasmid pACHL01, complete sequence.	0	0	54292	0	0	0.000423396	54292	0.000148884
643348570	NC_011958 Rhodobacter sphaeroides KD131 chromosome 2, complete genome.	0	0	54292	0	0	0.000423396	54292	0.000148884
646311907	NC_013854 Azospirillum sp. B510, complete genome.	0	0	54292	0	0	0.000423396	54292	0.000148884
646564507	NC_014103 Bacillus megaterium DSM319 chromosome, complete genome.	0	0	54292	0	0	0.000423396	54292	0.000148884
646564518	NC_014004 Candidatus Sulcia muelleri DMIN chromosome, complete genome.	0	0	54292	0	0	0.000423396	54292	0.000148884
646564524	NC_014008 Coraliomargarita akajimensis DSM 45221 chromosome, complete genome.	0	0	54292	0	0	0.000423396	54292	0.000148884
650377939	FP929059 Eubacterium siraeum V10Sc8a draft genome.	0	0	54292	0	0	0.000423396	54292	0.000148884
651053061	CP002593 Pseudonocardia dioxanivorans CB1190, complete genome.	0	0	54292	0	0	0.000423396	54292	0.000148884
2506520020	Contig686 Mucilaginibacter paludis TPT56, DSM 18603 : Contig686	0	0	54292	0	0	0.000423396	54292	0.000148884
2506783010	Contig58 Leptonema illini 3055, DSM 21528 : Contig58	0	0	54292	0	0	0.000423396	54292	0.000148884
2509601004	Sinac_Contig49.1 Singulisphaera acidiphila MOB10, DSM 18658 : Sinac_Contig49.1	0	0	54292	0	0	0.000423396	54292	0.000148884
2511231060	NC_016010 Xanthomonas axonopodis pv. citrumelo F1 : NC_016010	0	0	54292	0	0	0.000423396	54292	0.000148884
2511231191	CP003115 Treponema pallidum pallidum DAL-1 : CP003115	0	0	54292	0	0	0.000423396	54292	0.000148884
2515154084	B051DRAFT_scaffold_0.1 Pontibacter roseus DSM 17521 : B051DRAFT_scaffold_0.1	0	0	54292	0	0	0.000423396	54292	0.000148884
2515154085	B049DRAFT_scaffold_0.1 Dysgonomonas mossii DSM 22836 : B049DRAFT_scaffold_0.1	0	0	54292	0	0	0.000423396	54292	0.000148884
2517093039	CP003685 Pyrococcus furiosus COM1 : CP003685	0	0	54292	0	0	0.000423396	54292	0.000148884
637000053	NC_007951 Burkholderia xenovorans LB400 chromosome 1, complete sequence.	0	0	54290	0	0	0.00042338	54290	0.000148879
637000075	NC_007963 Chromohalobacter salexigens DSM 3043, complete genome.	0	0	54290	0	0	0.00042338	54290	0.000148879
637000089	NC_002936 Dehalococcoides ethenogenes 195, complete genome.	0	0	54290	0	0	0.00042338	54290	0.000148879
637000142	NC_007576 Lactobacillus sakei subsp. sakei 23K, complete genome.	0	0	54290	0	0	0.00042338	54290	0.000148879
637000143	NC_006529 Lactobacillus salivarius subsp. salivarius UCC118 plasmid pSF118-20, complete sequence.	0	0	54290	0	0	0.00042338	54290	0.000148879
637000145	NC_008011 Lawsonia intracellularis PHE/MN1-00, complete genome.	0	0	54290	0	0	0.00042338	54290	0.000148879
637000159	NC_002678 Mesorhizobium loti MAFF303099, complete genome.	0	0	54290	0	0	0.00042338	54290	0.000148879
637000167	NC_007644 Moorella thermoacetica ATCC 39073, complete genome.	0	0	54290	0	0	0.00042338	54290	0.000148879
637000187	NC_007426 Natronomonas pharaonis DSM 2160, complete genome.	0	0	54290	0	0	0.00042338	54290	0.000148879
637000206	NC_005871 Photobacterium profundum SS9 plasmid pPBPR1, complete sequence.	0	0	54290	0	0	0.00042338	54290	0.000148879
637000226	NC_007204 Psychrobacter arcticus 273-4, complete genome.	0	0	54290	0	0	0.00042338	54290	0.000148879
637000236	NC_005027 Rhodopirellula baltica SH 1, complete genome.	0	0	54290	0	0	0.00042338	54290	0.000148879
637000250	NC_007677 Salinibacter ruber DSM 13855, complete genome.	0	0	54290	0	0	0.00042338	54290	0.000148879
637000255	NC_003197 Salmonella typhimurium LT2, complete genome.	0	0	54290	0	0	0.00042338	54290	0.000148879
637000305	NC_003888 Streptomyces coelicolor A3(2), complete genome.	0	0	54290	0	0	0.00042338	54290	0.000148879
637000342	NC_003919 Xanthomonas axonopodis pv. citri str. 306, complete genome.	0	0	54290	0	0	0.00042338	54290	0.000148879
638154509	AE008384 Methanosarcina mazei strain Goe1, complete genome.	0	0	54290	0	0	0.00042338	54290	0.000148879
639279302	NC_003304 Agrobacterium tumefaciens str. C58 chromosome circular, complete sequence.	0	0	54290	0	0	0.00042338	54290	0.000148879
639633005	NC_008711 Arthrobacter aurescens TC1, complete genome.	0	0	54290	0	0	0.00042338	54290	0.000148879
639633007	NC_008702 Azoarcus sp. BH72, complete genome.	0	0	54290	0	0	0.00042338	54290	0.000148879
639633018	NC_008512 Candidatus Carsonella ruddii PV, complete genome.	0	0	54290	0	0	0.00042338	54290	0.000148879
639633021	NC_008593 Clostridium novyi NT, complete genome.	0	0	54290	0	0	0.00042338	54290	0.000148879
639633035	NC_008555 Listeria welshimeri serovar 6b str. SLCC5334, complete genome.	0	0	54290	0	0	0.00042338	54290	0.000148879
639633041	NC_008596 Mycobacterium smegmatis str. MC2 155, complete genome.	0	0	54290	0	0	0.00042338	54290	0.000148879
639633044	NC_008726 Mycobacterium vanbaalenii PYR-1, complete genome.	0	0	54290	0	0	0.00042338	54290	0.000148879
639633057	NC_008700 Shewanella amazonensis SB2B, complete genome.	0	0	54290	0	0	0.00042338	54290	0.000148879
640069307	NC_009226 Burkholderia vietnamiensis G4 plasmid pBVIE05, complete sequence.	0	0	54290	0	0	0.00042338	54290	0.000148879
640427101	NC_009467 Acidiphilium cryptum JF-5 plasmid pACRY01, complete sequence.	0	0	54290	0	0	0.00042338	54290	0.000148879
640753009	NC_009795 Campylobacter concisus 13826 plasmid pCCON31, complete sequence.	0	0	54290	0	0	0.00042338	54290	0.000148879
640753027	NC_009613 Flavobacterium psychrophilum JIP02/86, complete genome.	0	0	54290	0	0	0.00042338	54290	0.000148879
641228508	NC_009901 Shewanella pealeana ATCC 700345, complete genome.	0	0	54290	0	0	0.00042338	54290	0.000148879
641228509	NC_010162 Sorangium cellulosum 'So ce 56', complete genome.	0	0	54290	0	0	0.00042338	54290	0.000148879
641522630	NC_010519 Haemophilus somnus 2336, complete genome.	0	0	54290	0	0	0.00042338	54290	0.000148879
642555112	NC_010622 Burkholderia phymatum STM815 chromosome 1, complete sequence.	0	0	54290	0	0	0.00042338	54290	0.000148879
643348505	NC_011981 Agrobacterium vitis S4 plasmid pAtS4e, complete sequence.	0	0	54290	0	0	0.00042338	54290	0.000148879
643348518	NC_011224 Borrelia duttonii Ly plasmid pl11, complete sequence.	0	0	54290	0	0	0.00042338	54290	0.000148879
643348542	NC_011297 Dictyoglomus thermophilum H-6-12, complete genome.	0	0	54290	0	0	0.00042338	54290	0.000148879
643348555	NC_011365 Gluconacetobacter diazotrophicus PAl 5, complete genome.	0	0	54290	0	0	0.00042338	54290	0.000148879
643348564	NC_011887 Methylobacterium nodulans ORS 2060 plasmid pMNOD02, complete sequence.	0	0	54290	0	0	0.00042338	54290	0.000148879
643348583	NC_011653 Thermosipho africanus TCF52B, complete genome.	0	0	54290	0	0	0.00042338	54290	0.000148879
643692010	NC_012225 Brachyspira hyodysenteriae WA1, complete genome.	0	0	54290	0	0	0.00042338	54290	0.000148879
643692029	NC_012115 Nautilia profundicola AmH, complete genome.	0	0	54290	0	0	0.00042338	54290	0.000148879
644736325	NC_013205 Alicyclobacillus acidocaldarius subsp. acidocaldarius DSM 446, complete genome.	0	0	54290	0	0	0.00042338	54290	0.000148879
644736333	NC_013190 Candidatus Accumulibacter phosphatis clade IIA str. UW-1 plasmid pAph02, complete sequence.	0	0	54290	0	0	0.00042338	54290	0.000148879
644736346	NC_013170 Cryptobacterium curtum DSM 15641, complete genome.	0	0	54290	0	0	0.00042338	54290	0.000148879
644736369	NC_009441 Flavobacterium johnsoniae UW101, complete genome.	0	0	54290	0	0	0.00042338	54290	0.000148879
644736371	NC_012918 Geobacter sp. M21, complete genome.	0	0	54290	0	0	0.00042338	54290	0.000148879
644736395	NC_013009 Neorickettsia risticii str. Illinois, complete genome.	0	0	54290	0	0	0.00042338	54290	0.000148879
644736404	NC_013159 Saccharomonospora viridis DSM 43017, complete genome.	0	0	54290	0	0	0.00042338	54290	0.000148879
646311910	NC_013714 Bifidobacterium dentium Bd1, complete genome.	0	0	54290	0	0	0.00042338	54290	0.000148879
646311912	NC_013418 Blattabacterium sp. (Periplaneta americana) str. BPLAN, complete genome.	0	0	54290	0	0	0.00042338	54290	0.000148879
646311918	NC_013282 Cronobacter turicensis, complete genome.	0	0	54290	0	0	0.00042338	54290	0.000148879
646311933	NC_013440 Haliangium ochraceum DSM 14365, complete genome.	0	0	54290	0	0	0.00042338	54290	0.000148879
646311953	NC_013523 Sphaerobacter thermophilus DSM 20745 chromosome 1, complete genome.	0	0	54290	0	0	0.00042338	54290	0.000148879
646311954	NC_013730 Spirosoma linguale DSM 74, complete genome.	0	0	54290	0	0	0.00042338	54290	0.000148879
646311961	NC_013522 Thermanaerovibrio acidaminovorans DSM 6589, complete genome.	0	0	54290	0	0	0.00042338	54290	0.000148879
646564516	NC_014010 Alpha proteobacterium IMCC1322 chromosome, complete genome.	0	0	54290	0	0	0.00042338	54290	0.000148879
646564547	NC_014122 Methanocaldococcus infernus ME chromosome, complete genome.	0	0	54290	0	0	0.00042338	54290	0.000148879
646564551	NC_014207 Methylotenera sp. 301 chromosome, complete genome.	0	0	54290	0	0	0.00042338	54290	0.000148879
646564565	NC_013521 Sanguibacter keddieii DSM 10542, complete genome.	0	0	54290	0	0	0.00042338	54290	0.000148879
646564585	NC_014153 Thiomonas intermedia K12 chromosome, complete genome.	0	0	54290	0	0	0.00042338	54290	0.000148879
647000302	NZ_ADFP01000001 Pyramidobacter piscolens W5455 contig00277, whole genome shotgun sequence.	0	0	54290	0	0	0.00042338	54290	0.000148879
648028012	NC_014387 Butyrivibrio proteoclasticus B316 chromosome 1, complete genome.	0	0	54290	0	0	0.00042338	54290	0.000148879
648028018	NC_014376 Clostridium saccharolyticum WM1 chromosome, complete genome.	0	0	54290	0	0	0.00042338	54290	0.000148879
648028047	NC_014363 Olsenella uli DSM 7084 chromosome, complete genome.	0	0	54290	0	0	0.00042338	54290	0.000148879
648028054	NC_014217 Starkeya novella DSM 506 chromosome, complete genome.	0	0	54290	0	0	0.00042338	54290	0.000148879
649633004	NC_014908 Alicycliphilus denitrificans BC plasmid pALIDE01, complete sequence.	0	0	54290	0	0	0.00042338	54290	0.000148879
649633007	NC_014816 Asticcacaulis excentricus CB 48 chromosome 1, complete sequence.	0	0	54290	0	0	0.00042338	54290	0.000148879
649633009	NC_014639 Bacillus atrophaeus 1942 chromosome, complete genome.	0	0	54290	0	0	0.00042338	54290	0.000148879
649633028	NC_014909 Candidatus Blochmannia vafer str. BVAF chromosome, complete genome.	0	0	54290	0	0	0.00042338	54290	0.000148879
649633090	NC_014664 Rhodomicrobium vannielii ATCC 17100 chromosome, complete genome.	0	0	54290	0	0	0.00042338	54290	0.000148879
649633092	NC_014738 Riemerella anatipestifer DSM 15868 chromosome, complete genome.	0	0	54290	0	0	0.00042338	54290	0.000148879
649633106	NC_014931 Variovorax paradoxus EPS chromosome, complete genome.	0	0	54290	0	0	0.00042338	54290	0.000148879
650377928	FP929040 Enterobacter cloacae subsp. cloacae NCTC 9394 draft genome.	0	0	54290	0	0	0.00042338	54290	0.000148879
650377955	CP002429 Lactobacillus helveticus H10, complete genome.	0	0	54290	0	0	0.00042338	54290	0.000148879
650377960	CP002274 Mycoplasma hyopneumoniae 168, complete genome.	0	0	54290	0	0	0.00042338	54290	0.000148879
650716004	NC_015138 Acidovorax avenae subsp. avenae ATCC 19860 chromosome, complete genome.	0	0	54290	0	0	0.00042338	54290	0.000148879
650716016	NC_015735 Candidatus Moranella endobia PCIT chromosome, complete genome.	0	0	54290	0	0	0.00042338	54290	0.000148879
650716018	NC_015736 Candidatus Tremblaya princeps PCIT chromosome, complete genome.	0	0	54290	0	0	0.00042338	54290	0.000148879
650716019	NC_015846 Capnocytophaga canimorsus Cc5 chromosome, complete genome.	0	0	54290	0	0	0.00042338	54290	0.000148879
650716031	NC_015723 Cupriavidus necator N-1 chromosome chromosome 2, complete sequence.	0	0	54290	0	0	0.00042338	54290	0.000148879
650716033	NC_015589 Desulfotomaculum ruminis DSM 2154 chromosome, complete genome.	0	0	54290	0	0	0.00042338	54290	0.000148879
650716051	NC_015435 Metallosphaera cuprina Ar-4 chromosome, complete genome.	0	0	54290	0	0	0.00042338	54290	0.000148879
650716065	NC_015711 Myxococcus fulvus HW-1 chromosome, complete genome.	0	0	54290	0	0	0.00042338	54290	0.000148879
650716068	NC_015579 Novosphingobium sp. PP1Y plasmid Lpl, complete sequence.	0	0	54290	0	0	0.00042338	54290	0.000148879
650716084	NC_015761 Salmonella bongori NCTC 12419, complete genome.	0	0	54290	0	0	0.00042338	54290	0.000148879
650716096	NC_014804 Thermococcus barophilus MP chromosome, complete genome.	0	0	54290	0	0	0.00042338	54290	0.000148879
650716106	NC_015224 Yersinia enterocolitica subsp. palearctica 105.5R(r) chromosome, complete genome.	0	0	54290	0	0	0.00042338	54290	0.000148879
2504136000	Hmar10411_Contig136 Hippea maritima MH2, DSM 10411 : Hmar10411_Contig136	0	0	54290	0	0	0.00042338	54290	0.000148879
2505679068	Contig98 Isoptericola variabilis 225 : Contig98	0	0	54290	0	0	0.00042338	54290	0.000148879
2506381023	Contig510 Cyclobacterium marinum DSM 745 : Contig510	0	0	54290	0	0	0.00042338	54290	0.000148879
2506520040	ChY396_CYB Chloroflexus sp. Y-396-1 : ChY396_CYB	0	0	54290	0	0	0.00042338	54290	0.000148879
2506783009	Halru_Contig_35 Halovivax ruber XH-70, DSM 18193 : Halru_Contig_35	0	0	54290	0	0	0.00042338	54290	0.000148879
2506783062	Thethe_Contig170 Thermoanaerobacterium thermosaccharolyticum M0795 : Thethe_Contig170	0	0	54290	0	0	0.00042338	54290	0.000148879
2507262026	DesniDRAFT_DNA.1 Desulfotomaculum nigrificans DSM 574 : DesniDRAFT_DNA.1	0	0	54290	0	0	0.00042338	54290	0.000148879
2509276016	PseJ35DRAFT_scaffold_0.1 Pseudoxanthomonas sp. J35 : PseJ35DRAFT_scaffold_0.1	0	0	54290	0	0	0.00042338	54290	0.000148879
2509601011	AnamoDRAFT_Contig35.1 Anaerobaculum mobile NGA, DSM 13181 : AnamoDRAFT_Contig35.1	0	0	54290	0	0	0.00042338	54290	0.000148879
2509601029	ThesuDRAFT_TSB.1 Thermaerobacter subterraneus C21, DSM 13965 : ThesuDRAFT_TSB.1	0	0	54290	0	0	0.00042338	54290	0.000148879
2510065009	Calag_Contig24.1 Caldisphaera lagunensis IC-154, DSM 15908 : Calag_Contig24.1	0	0	54290	0	0	0.00042338	54290	0.000148879
2510065062	ActroDRAFT_ARA.1 Actinospica robiniae DSM 44927 : ActroDRAFT_ARA.1	0	0	54290	0	0	0.00042338	54290	0.000148879
2511231054	NC_016078 Pelagibacterium halotolerans B2 : NC_016078	0	0	54290	0	0	0.00042338	54290	0.000148879
2511231074	NC_014307 Ralstonia solanacearum CFBP2957 : NC_014307	0	0	54290	0	0	0.00042338	54290	0.000148879
2511231076	NC_015913 Candidatus Arthromitus sp. SFB-mouse-Japan : NC_015913	0	0	54290	0	0	0.00042338	54290	0.000148879
2511231093	NC_016070 Thermoproteus tenax Kra1 : NC_016070	0	0	54290	0	0	0.00042338	54290	0.000148879
2511231113	NC_016111 Streptomyces cattleya NRRL 8057 : NC_016111	0	0	54290	0	0	0.00042338	54290	0.000148879
2511231125	NC_016512 Propionibacterium acnes TypeIA2 P.acn17 : NC_016512	0	0	54290	0	0	0.00042338	54290	0.000148879
2511231134	AP012044 Oscillibacter valericigenes Sjm18-20 : AP012044	0	0	54290	0	0	0.00042338	54290	0.000148879
2511231135	CP003315 Wigglesworthia glossinidia endosymbiont of Glossina morsitans : CP003315	0	0	54290	0	0	0.00042338	54290	0.000148879
2511231141	CP002902 Alicyclobacillus acidocaldarius acidocaldarius Tc-4-1 : CP002902	0	0	54290	0	0	0.00042338	54290	0.000148879
2511231145	CP002956 Yersinia pestis A1122 : CP002956	0	0	54290	0	0	0.00042338	54290	0.000148879
2511231175	CP003033 Staphylococcus aureus aureus VC40 : CP003033	0	0	54290	0	0	0.00042338	54290	0.000148879
2511231195	CP002897 Paracoccus denitrificans SD1 : CP002897	0	0	54290	0	0	0.00042338	54290	0.000148879
2513020048	CalaeDRAFT_Scaffold1.1 Caldilinea aerophila STL-6-01, DSM 14535 : CalaeDRAFT_Scaffold1.1	0	0	54290	0	0	0.00042338	54290	0.000148879
2513237118	YWQDRAFT_scaffold_0.1 Desulfurococcus mobilis DSM 2161 : YWQDRAFT_scaffold_0.1	0	0	54290	0	0	0.00042338	54290	0.000148879
2513237183	NC_017671 Stenotrophomonas maltophilia D457 : NC_017671	0	0	54290	0	0	0.00042338	54290	0.000148879
2513237191	NC_016027 Gluconacetobacter xylinus NBRC 3288 : NC_016027	0	0	54290	0	0	0.00042338	54290	0.000148879
2514885030	JANGC3DRAFT_Contig102.1 Janthinobacterium sp. GC3 : JANGC3DRAFT_Contig102.1	0	0	54290	0	0	0.00042338	54290	0.000148879
2515154016	A3E1DRAFT_scaffold_0.1 Catelliglobosispora koreensis DSM 44566 : A3E1DRAFT_scaffold_0.1	0	0	54290	0	0	0.00042338	54290	0.000148879
2515154031	A3EIDRAFT_scaffold_0.1 Enterococcus cecorum DSM 20682 : A3EIDRAFT_scaffold_0.1	0	0	54290	0	0	0.00042338	54290	0.000148879
2515154070	B036DRAFT_scaffold_0.1 Lewinella persica DSM 23188 : B036DRAFT_scaffold_0.1	0	0	54290	0	0	0.00042338	54290	0.000148879
2515154077	B060DRAFT_scaffold_0.1 Asticcacaulis benevestitus DSM 16100 : B060DRAFT_scaffold_0.1	0	0	54290	0	0	0.00042338	54290	0.000148879
2515154130	B152DRAFT_scaffold_0.1 Kiloniella laminariae DSM 19542 : B152DRAFT_scaffold_0.1	0	0	54290	0	0	0.00042338	54290	0.000148879
2515154138	B146DRAFT_scaffold_0.1 Aurantimonas ureilytica DSM 18598 : B146DRAFT_scaffold_0.1	0	0	54290	0	0	0.00042338	54290	0.000148879
2515154161	B145DRAFT_scaffold_0.1 Uliginosibacterium gangwonense DSM 18521 : B145DRAFT_scaffold_0.1	0	0	54290	0	0	0.00042338	54290	0.000148879
2515154162	B094DRAFT_scaffold_0.1 Legionella shakespearei DSM 23087 : B094DRAFT_scaffold_0.1	0	0	54290	0	0	0.00042338	54290	0.000148879
2515154167	B153DRAFT_scaffold_0.1 Spirosoma panaciterrae DSM 21099 : B153DRAFT_scaffold_0.1	0	0	54290	0	0	0.00042338	54290	0.000148879
2516143111	QWC_gnl_ANL_Contig_1.1 Alcaligenes faecalis ANA : QWC_gnl_ANL_Contig_1.1	0	0	54290	0	0	0.00042338	54290	0.000148879
2516493009	LABMEDRAFT_scaffold1.1 Labrys methylaminiphilus JLW10 : LABMEDRAFT_scaffold1.1	0	0	54290	0	0	0.00042338	54290	0.000148879
2516653058	MetmiDRAFT_scaffold1.1 Methylovulum miyakonense HT12 : MetmiDRAFT_scaffold1.1	0	0	54290	0	0	0.00042338	54290	0.000148879
2516653081	PhaarDRAFT_scaffold1.1 Phaeobacter arcticus DSM 23566 : PhaarDRAFT_scaffold1.1	0	0	54290	0	0	0.00042338	54290	0.000148879
2517093025	CP003513 Mycoplasma gallisepticum NC08_2008.031-4-3P : CP003513	0	0	54290	0	0	0.00042338	54290	0.000148879
2517487013	thala_Contig12.1 Thalassobacter arenae DSM 19593 : thala_Contig12.1	0	0	54290	0	0	0.00042338	54290	0.000148879
2515154174	B147DRAFT_scaffold_0.1 Desulfobacter curvatus DSM 3379 : B147DRAFT_scaffold_0.1	49064	0	0	0.000403828	0	0	49064	0.000134548
2510917036	Pelub58DRAFT_NODE-unique_1_len_32145.1 Pelagibacter-like (SAR11) HIMB058 : Pelub58DRAFT_NODE-unique_1_len_32145.1	48988	0	0	0.000403203	0	0	48988	0.000134339
2515154082	A3OIDRAFT_scaffold_0.1 Marinobacter lipolyticus BF04_CF-4 : A3OIDRAFT_scaffold_0.1	48962	0	0	0.000402989	0	0	48962	0.000134268
645058870	NZ_ABOX02000001 bacterium Ellin514, whole genome shotgun sequence.	48934	0	0	0.000402758	0	0	48934	0.000134191
2515154109	A3GKDRAFT_scaffold_0.1 Porphyromonas somerae DSM 23386 : A3GKDRAFT_scaffold_0.1	48926	0	0	0.000402692	0	0	48926	0.000134169
2515154143	A37UDRAFT_scaffold_0.1 Sciscionella marina DSM 45152 : A37UDRAFT_scaffold_0.1	48926	0	0	0.000402692	0	0	48926	0.000134169
2515154111	A3IKDRAFT_scaffold_0.1 Thiothrix flexilis DSM 14609 : A3IKDRAFT_scaffold_0.1	48914	0	0	0.000402594	0	0	48914	0.000134136
2513237112	YWCDRAFT_scaffold_0.1 Massilia alkalitolerans DSM 17462 : YWCDRAFT_scaffold_0.1	48906	0	0	0.000402528	0	0	48906	0.000134114
2513237120	YWWDRAFT_scaffold_0.1 Glycomyces tenuis DSM 44171 : YWWDRAFT_scaffold_0.1	48878	0	0	0.000402297	0	0	48878	0.000134038
2515154144	A3GQDRAFT_scaffold_0.1 Shimazuella kribbensis DSM 45090 : A3GQDRAFT_scaffold_0.1	48872	0	0	0.000402248	0	0	48872	0.000134021
2507262045	Flav1FDRAFT_FMD.1 Flavobacteria sp. MS190-1F : Flav1FDRAFT_FMD.1	48868	0	0	0.000402215	0	0	48868	0.00013401
2515154160	B144DRAFT_scaffold_0.1 Endozoicomonas elysicola DSM 22380 : B144DRAFT_scaffold_0.1	48860	0	0	0.000402149	0	0	48860	0.000133988
650716002	NC_015178 Acidiphilium multivorum AIU301 plasmid pACMV1, complete sequence.	48844	0	0	0.000402018	0	0	48844	0.000133944
2510461053	Contig169 Acetivibrio cellulolyticus CD2, DSM 1870 (ORNL annotation) : Contig169	48844	0	0	0.000402018	0	0	48844	0.000133944
641522605	NC_004923 Aeromonas salmonicida subsp. salmonicida plasmid pAsa1, complete sequence.	48840	0	0	0.000401985	0	0	48840	0.000133933
646862306	AP011149 Acetobacter pasteurianus IFO 3283-26 DNA, complete genome.	48840	0	0	0.000401985	0	0	48840	0.000133933
2510065005	ThePKDRAFT_TPC.1 Thermococcus sp. PK : ThePKDRAFT_TPC.1	48840	0	0	0.000401985	0	0	48840	0.000133933
2511231222	HE577327 Azospirillum brasilense Sp245 : HE577327	48840	0	0	0.000401985	0	0	48840	0.000133933
637000229	NC_007336 Ralstonia eutropha JMP134 megaplasmid, complete sequence.	48838	0	0	0.000401968	0	0	48838	0.000133928
640753051	NC_009620 Sinorhizobium medicae WSM419 plasmid pSMED01, complete sequence.	48838	0	0	0.000401968	0	0	48838	0.000133928
2501004205	Dshibae_ctg50 Dinoroseobacter shibae DFL-12 : Dshibae_ctg50	48838	0	0	0.000401968	0	0	48838	0.000133928
640753022	NC_009778 Enterobacter sakazakii ATCC BAA-894, complete genome.	48836	0	0	0.000401952	0	0	48836	0.000133922
642555139	NC_010721 Methylobacterium populi BJ001 plasmid pMPOP02, complete sequence.	48836	0	0	0.000401952	0	0	48836	0.000133922
642555152	NC_010994 Rhizobium etli CIAT 652, complete genome.	48836	0	0	0.000401952	0	0	48836	0.000133922
643692020	NC_012526 Deinococcus deserti VCD115, complete genome.	48836	0	0	0.000401952	0	0	48836	0.000133922
649633013	NC_015164 Bacteroides salanitronis DSM 18170 chromosome, complete genome.	48836	0	0	0.000401952	0	0	48836	0.000133922
637000033	NC_002928 Bordetella parapertussis 12822, complete genome.	48834	0	0	0.000401935	0	0	48834	0.000133917
637000042	NC_004310 Brucella suis 1330 chromosome I, complete sequence.	48834	0	0	0.000401935	0	0	48834	0.000133917
637000082	NC_002935 Corynebacterium diphtheriae NCTC 13129, complete genome.	48834	0	0	0.000401935	0	0	48834	0.000133917
637000087	NC_008255 Cytophaga hutchinsonii ATCC 33406, complete genome.	48834	0	0	0.000401935	0	0	48834	0.000133917
637000095	NC_007519 Desulfovibrio desulfuricans G20, complete genome.	48834	0	0	0.000401935	0	0	48834	0.000133917
637000103	NC_007722 Erythrobacter litoralis HTCC2594, complete genome.	48834	0	0	0.000401935	0	0	48834	0.000133917
637000151	NC_004342 Leptospira interrogans serovar Lai str. 56601 chromosome I, complete sequence.	48834	0	0	0.000401935	0	0	48834	0.000133917
637000162	NC_007349 Methanosarcina barkeri str. fusaro plasmid 1, complete sequence.	48834	0	0	0.000401935	0	0	48834	0.000133917
637000180	NC_006908 Mycoplasma mobile 163K, complete genome.	48834	0	0	0.000401935	0	0	48834	0.000133917
637000193	NC_007406 Nitrobacter winogradskyi Nb-255, complete genome.	48834	0	0	0.000401935	0	0	48834	0.000133917
637000195	NC_004757 Nitrosomonas europaea ATCC 19718, complete genome.	48834	0	0	0.000401935	0	0	48834	0.000133917
637000222	NC_002947 Pseudomonas putida KT2440, complete genome.	48834	0	0	0.000401935	0	0	48834	0.000133917
637000248	NC_008148 Rubrobacter xylanophilus DSM 9941, complete genome.	48834	0	0	0.000401935	0	0	48834	0.000133917
637000263	NC_004741 Shigella flexneri 2a str. 2457T, complete genome.	48834	0	0	0.000401935	0	0	48834	0.000133917
637000269	NC_003037 Sinorhizobium meliloti 1021 plasmid pSymA, complete sequence.	48834	0	0	0.000401935	0	0	48834	0.000133917
637000296	NC_004070 Streptococcus pyogenes MGAS315, complete genome.	48834	0	0	0.000401935	0	0	48834	0.000133917
638154508	AE010299 Methanosarcina acetivorans str. C2A, complete genome.	48834	0	0	0.000401935	0	0	48834	0.000133917
639279303	NC_006322 Bacillus licheniformis ATCC 14580, complete genome.	48834	0	0	0.000401935	0	0	48834	0.000133917
639633009	NC_008783 Bartonella bacilliformis KC583, complete genome.	48834	0	0	0.000401935	0	0	48834	0.000133917
639633010	NC_008618 Bifidobacterium adolescentis ATCC 15703, complete genome.	48834	0	0	0.000401935	0	0	48834	0.000133917
639633015	NC_008784 Burkholderia mallei SAVP1 chromosome I, complete sequence.	48834	0	0	0.000401935	0	0	48834	0.000133917
639633049	NC_008525 Pediococcus pentosaceus ATCC 25745, complete genome.	48834	0	0	0.000401935	0	0	48834	0.000133917
640069310	NC_009253 Desulfotomaculum reducens MI-1, complete genome.	48834	0	0	0.000401935	0	0	48834	0.000133917
640069313	NC_009138 Herminiimonas arsenicoxydans, complete genome.	48834	0	0	0.000401935	0	0	48834	0.000133917
640069319	NC_008825 Methylibium petroleiphilum PM1, complete genome.	48834	0	0	0.000401935	0	0	48834	0.000133917
640427131	NC_009439 Pseudomonas mendocina ymp, complete genome.	48834	0	0	0.000401935	0	0	48834	0.000133917
640427153	NC_009464 Uncultured methanogenic archaeon RC-I, complete genome.	48834	0	0	0.000401935	0	0	48834	0.000133917
640753059	NC_009717 Xanthobacter autotrophicus Py2 plasmid pXAUT01, complete sequence.	48834	0	0	0.000401935	0	0	48834	0.000133917
641228484	NC_010118 Candidatus Sulcia muelleri GWSS, complete genome.	48834	0	0	0.000401935	0	0	48834	0.000133917
641522613	NS_000189 Cenarchaeum symbiosum A.	48834	0	0	0.000401935	0	0	48834	0.000133917
641522617	NC_010418 Clostridium botulinum A3 str. Loch Maree plasmid pCLK, complete sequence.	48834	0	0	0.000401935	0	0	48834	0.000133917
641522642	NC_010604 Mycobacterium marinum M plasmid pMM23, complete sequence.	48834	0	0	0.000401935	0	0	48834	0.000133917
641522653	NC_010572 Streptomyces griseus subsp. griseus NBRC 13350, complete genome.	48834	0	0	0.000401935	0	0	48834	0.000133917
641522657	NC_010525 Thermoproteus neutrophilus V24Sta, complete genome.	48834	0	0	0.000401935	0	0	48834	0.000133917
641522658	NC_010503 Ureaplasma parvum serovar 3 str. ATCC 27815, complete genome.	48834	0	0	0.000401935	0	0	48834	0.000133917
642555115	CU466930 Candidatus Cloacamonas acidaminovorans provisional genome sequence from WWE1 candidate division, obtained from Evry mesophilic	48834	0	0	0.000401935	0	0	48834	0.000133917
642555117	NC_010544 Candidatus Phytoplasma australiense, complete genome.	48834	0	0	0.000401935	0	0	48834	0.000133917
642555138	NC_010794 Methylacidiphilum infernorum V4, complete genome.	48834	0	0	0.000401935	0	0	48834	0.000133917
643348527	NC_011831 Chloroflexus aggregans DSM 9485, complete genome.	48834	0	0	0.000401935	0	0	48834	0.000133917
643348575	NC_011566 Shewanella piezotolerans WP3, complete genome.	48834	0	0	0.000401935	0	0	48834	0.000133917
643348578	NC_012004 Streptococcus uberis 0140J, complete genome.	48834	0	0	0.000401935	0	0	48834	0.000133917
643348580	NC_011529 Thermococcus onnurineus NA1, complete genome.	48834	0	0	0.000401935	0	0	48834	0.000133917
643692015	NC_012032 Chloroflexus sp. Y-400-fl, complete genome.	48834	0	0	0.000401935	0	0	48834	0.000133917
643692024	NC_012489 Gemmatimonas aurantiaca T-27, complete genome.	48834	0	0	0.000401935	0	0	48834	0.000133917
643692030	NC_012439 Persephonella marina EX-H1 plasmid unnamed, complete sequence.	48834	0	0	0.000401935	0	0	48834	0.000133917
644736323	NC_013093 Actinosynnema mirum DSM 43827, complete genome.	48834	0	0	0.000401935	0	0	48834	0.000133917
644736331	NC_013172 Brachybacterium faecium DSM 4810, complete genome.	48834	0	0	0.000401935	0	0	48834	0.000133917
644736353	NC_012881 Desulfovibrio salexigens DSM 2638, complete genome.	48834	0	0	0.000401935	0	0	48834	0.000133917
644736380	NC_013169 Kytococcus sedentarius DSM 20547, complete genome.	48834	0	0	0.000401935	0	0	48834	0.000133917
644736403	NC_012730 Rickettsia peacockii str. Rustic, complete genome.	48834	0	0	0.000401935	0	0	48834	0.000133917
646311949	NC_013501 Rhodothermus marinus DSM 4252, complete genome.	48834	0	0	0.000401935	0	0	48834	0.000133917
646311951	NC_013715 Rothia mucilaginosa DY-18, complete genome.	48834	0	0	0.000401935	0	0	48834	0.000133917
646564506	NC_014166 Arcobacter nitrofigilis DSM 7299 chromosome, complete genome.	48834	0	0	0.000401935	0	0	48834	0.000133917
646564528	NC_014216 Desulfurivibrio alkaliphilus AHT2 chromosome, complete genome.	48834	0	0	0.000401935	0	0	48834	0.000133917
646564549	NC_014222 Methanococcus voltae A3 chromosome, complete genome.	48834	0	0	0.000401935	0	0	48834	0.000133917
646564557	NC_014210 Nocardiopsis dassonvillei subsp. dassonvillei DSM 43111 chromosome, complete genome.	48834	0	0	0.000401935	0	0	48834	0.000133917
646564573	NC_014205 Staphylothermus hellenicus DSM 12710 chromosome, complete genome.	48834	0	0	0.000401935	0	0	48834	0.000133917
646862319	CP001713 Chlamydophila pneumoniae LPCoLN, complete genome.	48834	0	0	0.000401935	0	0	48834	0.000133917
648028011	NC_014539 Burkholderia sp. CCGE1003 chromosome chromosome 1, complete sequence.	48834	0	0	0.000401935	0	0	48834	0.000133917
648028041	NC_014408 Methanothermobacter marburgensis str. Marburg chromosome, complete genome.	48834	0	0	0.000401935	0	0	48834	0.000133917
648028062	NC_014537 Vulcanisaeta distributa DSM 14429 chromosome, complete genome.	48834	0	0	0.000401935	0	0	48834	0.000133917
648231711	CP002033 Lactobacillus fermentum CECT 5716, complete genome.	48834	0	0	0.000401935	0	0	48834	0.000133917
649633005	NC_014960 Anaerolinea thermophila UNI-1, complete genome.	48834	0	0	0.000401935	0	0	48834	0.000133917
649633008	NC_014551 Bacillus amyloliquefaciens DSM 7, complete genome.	48834	0	0	0.000401935	0	0	48834	0.000133917
649633012	NC_014933 Bacteroides helcogenes P 36-108 chromosome, complete genome.	48834	0	0	0.000401935	0	0	48834	0.000133917
649633031	NC_014934 Cellulophaga algicola DSM 14237 chromosome, complete genome.	48834	0	0	0.000401935	0	0	48834	0.000133917
649633033	NC_014614 Clostridium sticklandii DSM 519 chromosome, complete genome.	48834	0	0	0.000401935	0	0	48834	0.000133917
649633043	NC_014828 Ethanoligenens harbinense YUAN-3 chromosome, complete genome.	48834	0	0	0.000401935	0	0	48834	0.000133917
649633044	NC_014624 Eubacterium limosum KIST612 chromosome, complete genome.	48834	0	0	0.000401935	0	0	48834	0.000133917
649633054	NC_014810 Helicobacter felis ATCC 49179, complete genome.	48834	0	0	0.000401935	0	0	48834	0.000133917
649633075	NC_014752 Neisseria lactamica ST-640, complete genome.	48834	0	0	0.000401935	0	0	48834	0.000133917
649633104	NC_014917 Thermovibrio ammonificans HB-1 plasmid pTHEAM01, complete sequence.	48834	0	0	0.000401935	0	0	48834	0.000133917
650377903	CP002177 Acinetobacter calcoaceticus PHEA-2, complete genome.	48834	0	0	0.000401935	0	0	48834	0.000133917
650377953	CP002221 Hydrogenobacter thermophilus TK-6, complete genome.	48834	0	0	0.000401935	0	0	48834	0.000133917
650377959	AP009608 Mycoplasma fermentans PG18 DNA, nearly complete genome.	48834	0	0	0.000401935	0	0	48834	0.000133917
650716012	NC_015662 Buchnera aphidicola (Cinara tujafilina) chromosome, complete genome.	48834	0	0	0.000401935	0	0	48834	0.000133917
650716027	NC_015737 Clostridium sp. SY8519, complete genome.	48834	0	0	0.000401935	0	0	48834	0.000133917
650716028	NC_015856 Collimonas fungivorans Ter331 chromosome, complete genome.	48834	0	0	0.000401935	0	0	48834	0.000133917
650716032	NC_015563 Delftia sp. Cs1-4 chromosome, complete genome.	48834	0	0	0.000401935	0	0	48834	0.000133917
650716041	NC_015670 Helicobacter bizzozeronii CIII-1 plasmid phbz1, complete sequence.	48834	0	0	0.000401935	0	0	48834	0.000133917
650716049	NC_015734 Leuconostoc sp. C2 chromosome, complete genome.	48834	0	0	0.000401935	0	0	48834	0.000133917
650716055	NC_015632 Methanothermococcus okinawensis IH1 plasmid pMETOK01, complete sequence.	48834	0	0	0.000401935	0	0	48834	0.000133917
650716064	NC_015155 Mycoplasma suis str. Illinois chromosome, complete genome.	48834	0	0	0.000401935	0	0	48834	0.000133917
650716073	NC_015311 Prevotella denticola F0289 chromosome, complete genome.	48834	0	0	0.000401935	0	0	48834	0.000133917
650716080	NC_015680 Pyrococcus yayanosii CH1 chromosome, complete genome.	48834	0	0	0.000401935	0	0	48834	0.000133917
650716091	NC_015600 Streptococcus pasteurianus ATCC 43144, complete genome.	48834	0	0	0.000401935	0	0	48834	0.000133917
650716100	NC_015500 Treponema brennaborense DSM 12168 chromosome, complete genome.	48834	0	0	0.000401935	0	0	48834	0.000133917
651053011	CP001851 Brucella melitensis M5-90 chromosome I, complete sequence.	48834	0	0	0.000401935	0	0	48834	0.000133917
651053027	CP002725 Gardnerella vaginalis HMP9231, complete genome.	48834	0	0	0.000401935	0	0	48834	0.000133917
651053077	FP475956 Thiomonas sp. str. 3As chromosome, complete genome.	48834	0	0	0.000401935	0	0	48834	0.000133917
2504643006	Mhyd14884_Contig168 Marinithermus hydrothermalis T1, DSM 14884 : Mhyd14884_Contig168	48834	0	0	0.000401935	0	0	48834	0.000133917
2504756058	Contig145 Thermoanaerobacter wiegelii Rt8.B1 : Contig145	48834	0	0	0.000401935	0	0	48834	0.000133917
2505679005	Contig71 Pyrolobus fumarii 1A, DSM 11204 : Contig71	48834	0	0	0.000401935	0	0	48834	0.000133917
2505679006	Contig91 Spirochaeta caldaria H1, DSM 7334 : Contig91	48834	0	0	0.000401935	0	0	48834	0.000133917
2506485007	Contig247 Caldicellulosiruptor lactoaceticus 6A, DSM 9545 : Contig247	48834	0	0	0.000401935	0	0	48834	0.000133917
2506520050	Contig1 Myroides odoratus DSM 2801 : Contig1	48834	0	0	0.000401935	0	0	48834	0.000133917
2506783047	HalDL1_Contig38 Halobacterium sp. DL1 : HalDL1_Contig38	48834	0	0	0.000401935	0	0	48834	0.000133917
2507149024	Desme_Contig76.1 Desulfitobacterium metallireducens 853-15A, DSM 15288 : Desme_Contig76.1	48834	0	0	0.000401935	0	0	48834	0.000133917
2509601017	Halha_Contig26.1 Halobacteroides halobius MD-1, DSM 5150 : Halha_Contig26.1	48834	0	0	0.000401935	0	0	48834	0.000133917
2509601034	Fraau_Contig24.1 Frateuria aurantia Kondo 67, DSM 6220 : Fraau_Contig24.1	48834	0	0	0.000401935	0	0	48834	0.000133917
2509601048	Natpe_Contig129 Natrinema pellirubrum 157, JCM 10476 : Natpe_Contig129	48834	0	0	0.000401935	0	0	48834	0.000133917
2510917010	CP002901 Sulfobacillus acidophilus TPY : CP002901	48834	0	0	0.000401935	0	0	48834	0.000133917
2511231072	NC_016632 Candidatus Serratia symbiotica Cinara cedri : NC_016632	48834	0	0	0.000401935	0	0	48834	0.000133917
2511231128	NC_015977 Roseburia hominis A2-183, DSM 16839 : NC_015977	48834	0	0	0.000401935	0	0	48834	0.000133917
2511231164	CP003279 Salmonella enterica enterica sv. Typhi P-stx-12 : CP003279	48834	0	0	0.000401935	0	0	48834	0.000133917
2511231165	AP012280 Pseudomonas aeruginosa NCGM2.S1 : AP012280	48834	0	0	0.000401935	0	0	48834	0.000133917
2511231214	CP003039 Bifidobacterium animalis lactis BLC1 : CP003039	48834	0	0	0.000401935	0	0	48834	0.000133917
2512047039	CP003316 Pyrobaculum oguniense TE7, DSM 13380 : CP003316	48834	0	0	0.000401935	0	0	48834	0.000133917
2512564055	CP003243 Methanocella conradii HZ254 : CP003243	48834	0	0	0.000401935	0	0	48834	0.000133917
2512564080	CP003393 Rickettsia rickettsii BuV67-CWPP : CP003393	48834	0	0	0.000401935	0	0	48834	0.000133917
2512564091	Desace_Contig265.1 Desulfurella acetivorans A63, DSM 5264 : Desace_Contig265.1	48834	0	0	0.000401935	0	0	48834	0.000133917
2513237181	NC_017096 Caldisericum exile AZM16c01, NBRC 104410 : NC_017096	48834	0	0	0.000401935	0	0	48834	0.000133917
2513237186	NC_017668 Halobacillus halophilus DSM 2266 : NC_017668	48834	0	0	0.000401935	0	0	48834	0.000133917
2516493021	TheaeDRAFT_scaffold1.1 Thermicanus aegyptius DSM 12793 : TheaeDRAFT_scaffold1.1	48834	0	0	0.000401935	0	0	48834	0.000133917
2516653055	RHOSADRAFT_scaffold1.1 Rhodovibrio salinarum DSM 9154 : RHOSADRAFT_scaffold1.1	48834	0	0	0.000401935	0	0	48834	0.000133917
2517093013	RudluDRAFT_scaffold1.1 Rudanella lutea DSM 19387 : RudluDRAFT_scaffold1.1	48834	0	0	0.000401935	0	0	48834	0.000133917
2517093018	EntIITBT8DRAFT_scaffold1.1 Enterobacter cloacae IIT-BT 08 : EntIITBT8DRAFT_scaffold1.1	48834	0	0	0.000401935	0	0	48834	0.000133917
2517287006	ladfl_LADFL_1.1 Labrenzia alexandrii DFL-11 : ladfl_LADFL_1.1	48834	0	0	0.000401935	0	0	48834	0.000133917
2517287034	MetmaDRAFT_scaffold1.1 Methylobacterium marinus A45 : MetmaDRAFT_scaffold1.1	48834	0	0	0.000401935	0	0	48834	0.000133917
2513237092	YU9DRAFT_scaffold_0.1 Bradyrhizobium japonicum WSM1743 : YU9DRAFT_scaffold_0.1	0	37264	0	0	0.000324227	0	37264	0.000102189
2513237165	A3AGDRAFT_scaffold_0.1 Cupriavidus taiwanensis STM6070 : A3AGDRAFT_scaffold_0.1	0	37210	0	0	0.000323757	0	37210	0.000102041
2515154145	A3EMDRAFT_scaffold_0.1 Flexithrix dorotheae DSM 6795 : A3EMDRAFT_scaffold_0.1	0	37204	0	0	0.000323705	0	37204	0.000102024
2514885008	A3EODRAFT_scaffold_0.1 Gallibacterium anatis DSM 16844 : A3EODRAFT_scaffold_0.1	0	37196	0	0	0.000323635	0	37196	0.000102002
2515154176	B132DRAFT_scaffold_0.1 Blautia producta ATCC 27340 : B132DRAFT_scaffold_0.1	0	37164	0	0	0.000323357	0	37164	0.000101914
2504756061	NODE_1_length_1322_cov_383.843414 Ochrobactrum intermedium J2 : NODE_1_length_1322_cov_383.843414	0	37160	0	0	0.000323322	0	37160	0.000101903
2513237135	A3CMDRAFT_scaffold_0.1 Teredinibacter turnerae T8602 : A3CMDRAFT_scaffold_0.1	0	37158	0	0	0.000323305	0	37158	0.000101898
2513237114	YWGDRAFT_scaffold_0.1 Ignatzschineria larvae DSM 13226 : YWGDRAFT_scaffold_0.1	0	37144	0	0	0.000323183	0	37144	0.00010186
2516143110	QWE_gnl_ANL_TiAa2_c1.1 Agrobacterium albertimagni AOL15 : QWE_gnl_ANL_TiAa2_c1.1	0	37142	0	0	0.000323165	0	37142	0.000101854
2510065087	RhoOR87DRAFT_scaffold_0.1 Rhodanobacter sp. OR87 : RhoOR87DRAFT_scaffold_0.1	0	37140	0	0	0.000323148	0	37140	0.000101849
2515154158	B151DRAFT_scaffold_0.1 Gracilimonas tropica DSM 19535 : B151DRAFT_scaffold_0.1	0	37140	0	0	0.000323148	0	37140	0.000101849
2513237155	A3GODRAFT_scaffold_0.1 Sedimenticola selenatireducens AK4OH1, DSM 17993 : A3GODRAFT_scaffold_0.1	0	37136	0	0	0.000323113	0	37136	0.000101838
2515154078	B059DRAFT_scaffold_0.1 Thiobacillus denitrificans DSM 12475 : B059DRAFT_scaffold_0.1	0	37136	0	0	0.000323113	0	37136	0.000101838
2513237123	YW9DRAFT_scaffold_0.1 Capnocytophaga cynodegmi E6447, DSM 19736 : YW9DRAFT_scaffold_0.1	0	37132	0	0	0.000323078	0	37132	0.000101827
2515154119	A37QDRAFT_scaffold_0.1 Fangia hongkongensis DSM 21703 : A37QDRAFT_scaffold_0.1	0	37132	0	0	0.000323078	0	37132	0.000101827
650633000	NZ_ABDE02000001 Victivallis vadensis ATCC BAA-548 ctg390, whole genome shotgun sequence.	0	37128	0	0	0.000323044	0	37128	0.000101816
2513237119	YWMDRAFT_scaffold_0.1 Thermocrispum municipale DSM 44069 : YWMDRAFT_scaffold_0.1	0	37122	0	0	0.000322991	0	37122	0.000101799
2515154011	A3G1DRAFT_scaffold_0.1 Longispora albida DSM 44784 : A3G1DRAFT_scaffold_0.1	0	37122	0	0	0.000322991	0	37122	0.000101799
650377913	CP001652 Borrelia burgdorferi JD1 plasmid JD1_lp54, complete sequence.	0	37120	0	0	0.000322974	0	37120	0.000101794
2508501049	MetMK1DRAFT_MMQ.1 Metallosphaera sp. MK1 : MetMK1DRAFT_MMQ.1	0	37120	0	0	0.000322974	0	37120	0.000101794
2508501114	MicloDRAFT_MLG.1 Microvirga sp. WSM3557 : MicloDRAFT_MLG.1	0	37118	0	0	0.000322957	0	37118	0.000101788
2515154092	B064DRAFT_scaffold_0.1 Desulfurispora thermophila DSM 16022 : B064DRAFT_scaffold_0.1	0	37116	0	0	0.000322939	0	37116	0.000101783
646564513	NC_008273 Borrelia afzelii PKo plasmid cp30, complete sequence.	0	37114	0	0	0.000322922	0	37114	0.000101777
2515154026	A3CYDRAFT_scaffold_0.1 Butyricimonas synergistica DSM 23225 : A3CYDRAFT_scaffold_0.1	0	37114	0	0	0.000322922	0	37114	0.000101777
2517093005	B090DRAFT_scaffold_0.1 Acinetobacter bouvetii DSM 14964 : B090DRAFT_scaffold_0.1	0	37114	0	0	0.000322922	0	37114	0.000101777
2514885021	CohpaDRAFT_Contig117.1 Cohnella panacarvi Gsoil 349, DSM 18696 : CohpaDRAFT_Contig117.1	0	37112	0	0	0.000322904	0	37112	0.000101772
2515154028	A3GUDRAFT_scaffold_0.1 Streptococcus didelphis DSM 15616 : A3GUDRAFT_scaffold_0.1	0	37112	0	0	0.000322904	0	37112	0.000101772
2509887033	SedOR43DRAFT_scaffold_0.1 Sediminibacterium sp OR43 : SedOR43DRAFT_scaffold_0.1	0	37110	0	0	0.000322887	0	37110	0.000101766
639633051	NC_008757 Polaromonas naphthalenivorans CJ2 plasmid pPNAP01, complete sequence.	0	37108	0	0	0.00032287	0	37108	0.000101761
2512875023	RSPH_Chromosome_1.1 Rhodobacter sphaeroides 2.4.1 : RSPH_Chromosome_1.1	0	37108	0	0	0.00032287	0	37108	0.000101761
643348519	NC_011244 Borrelia recurrentis A1, complete genome.	0	37106	0	0	0.000322852	0	37106	0.000101755
646311934	NC_013743 Haloterrigena turkmenica DSM 5511, complete genome.	0	37106	0	0	0.000322852	0	37106	0.000101755
2510065015	ThidrDRAFT_TDA.1 Thiorhodococcus drewsii AZ1 : ThidrDRAFT_TDA.1	0	37106	0	0	0.000322852	0	37106	0.000101755
2516493023	OREMADRAFT_scaffold1.1 Orenia marismortui DSM 5156 : OREMADRAFT_scaffold1.1	0	37106	0	0	0.000322852	0	37106	0.000101755
2517487021	B143DRAFT_scaffold_0.1 Wohlfahrtiimonas chitiniclastica DSM 18708 : B143DRAFT_scaffold_0.1	0	37106	0	0	0.000322852	0	37106	0.000101755
637000101	NC_004668 Enterococcus faecalis V583, complete genome.	0	37104	0	0	0.000322835	0	37104	0.00010175
637000122	NC_006672 Gluconobacter oxydans 621H plasmid pGOX1, complete sequence.	0	37104	0	0	0.000322835	0	37104	0.00010175
637000234	NC_008268 Rhodococcus sp. RHA1, complete genome.	0	37104	0	0	0.000322835	0	37104	0.00010175
639633055	NC_008378 Rhizobium leguminosarum bv. viciae 3841, plasmid pRL12, complete sequence.	0	37104	0	0	0.000322835	0	37104	0.00010175
641522638	NC_010502 Methylobacterium radiotolerans JCM 2831 plasmid pMRAD06, complete sequence.	0	37104	0	0	0.000322835	0	37104	0.00010175
642555128	NC_010693 Erwinia tasmaniensis plasmid pET46, complete sequence.	0	37104	0	0	0.000322835	0	37104	0.00010175
646564555	NC_013922 Natrialba magadii ATCC 43099 chromosome, complete genome.	0	37104	0	0	0.000322835	0	37104	0.00010175
646564564	NC_006969 Rhodococcus opacus B4 plasmid pKNR01, complete sequence.	0	37104	0	0	0.000322835	0	37104	0.00010175
650377931	CP002124 Erwinia sp. Ejp617, complete genome.	0	37104	0	0	0.000322835	0	37104	0.00010175
650716003	NC_015850 Acidithiobacillus caldus SM-1 chromosome, complete genome.	0	37104	0	0	0.000322835	0	37104	0.00010175
637000047	NC_008385 Burkholderia cepacia AMMD plasmid 1, complete sequence.	0	37102	0	0	0.000322817	0	37102	0.000101744
637000094	NC_006138 Desulfotalea psychrophila LSv54, complete genome.	0	37102	0	0	0.000322817	0	37102	0.000101744
637000160	NC_008242 Mesorhizobium sp. BNC1 plasmid 1, complete sequence.	0	37102	0	0	0.000322817	0	37102	0.000101744
639633048	NC_008686 Paracoccus denitrificans PD1222 chromosome 1, complete sequence.	0	37102	0	0	0.000322817	0	37102	0.000101744
640069301	NC_009083 Acinetobacter baumannii ATCC 17978 plasmid pAB1, complete sequence.	0	37102	0	0	0.000322817	0	37102	0.000101744
640427122	NC_009338 Mycobacterium gilvum PYR-GCK, complete genome.	0	37102	0	0	0.000322817	0	37102	0.000101744
640753038	NC_009667 Ochrobactrum anthropi ATCC 49188 chromosome 1, complete sequence.	0	37102	0	0	0.000322817	0	37102	0.000101744
642555116	CT030148 Kuenenia stuttgartiensis genome fragment KUST_A (1 of 5).	0	37102	0	0	0.000322817	0	37102	0.000101744
642555136	NC_010842 Leptospira biflexa serovar Patoc strain 'Patoc 1 (Ames)' chromosome I, complete sequence.	0	37102	0	0	0.000322817	0	37102	0.000101744
643348563	NC_011757 Methylobacterium chloromethanicum CM4, complete genome.	0	37102	0	0	0.000322817	0	37102	0.000101744
646311908	NC_013791 Bacillus pseudofirmus OF4 chromosome, complete genome.	0	37102	0	0	0.000322817	0	37102	0.000101744
648028046	NC_014315 Nitrosococcus watsoni C-113 chromosome, complete genome.	0	37102	0	0	0.000322817	0	37102	0.000101744
649633035	NC_015161 Deinococcus proteolyticus MRP chromosome, complete genome.	0	37102	0	0	0.000322817	0	37102	0.000101744
649633042	NC_014304 Erwinia billingiae Eb661 plasmid pEB102, complete sequence.	0	37102	0	0	0.000322817	0	37102	0.000101744
650716013	NC_015376 Burkholderia gladioli BSR3 chromosome chromosome 2, complete sequence.	0	37102	0	0	0.000322817	0	37102	0.000101744
650716066	NC_015221 Nitrosomonas sp. AL212 plasmid pNAL21202, complete sequence.	0	37102	0	0	0.000322817	0	37102	0.000101744
2501939606	Zmob_ZM11163contig16 Zymomonas mobilis NCIB 11163 : Zmob_ZM11163contig16	0	37102	0	0	0.000322817	0	37102	0.000101744
2508501047	BegalDRAFT_BAX.1 Beggiatoa alba B18LD : BegalDRAFT_BAX.1	0	37102	0	0	0.000322817	0	37102	0.000101744
2509601038	CytfeDRAFT_CFC.1 Cytophaga fermentans IAM 14302, DSM 9555 : CytfeDRAFT_CFC.1	0	37102	0	0	0.000322817	0	37102	0.000101744
2510065085	CalpoDRAFT_CPK.1 Caldanaerobius polysaccharolyticum KMTHCJ, DSM 13641 : CalpoDRAFT_CPK.1	0	37102	0	0	0.000322817	0	37102	0.000101744
2511231143	CP003106 Leuconostoc mesenteroides mesenteroides J18 : CP003106	0	37102	0	0	0.000322817	0	37102	0.000101744
2511231199	CP003223 Klebsiella pneumoniae pneumoniae HS11286 : CP003223	0	37102	0	0	0.000322817	0	37102	0.000101744
2512047035	NC_016745 Oceanimonas sp. GK1 : NC_016745	0	37102	0	0	0.000322817	0	37102	0.000101744
637000004	NC_008260 Alcanivorax borkumensis SK2, complete genome.	0	37100	0	0	0.0003228	0	37100	0.000101739
637000015	NC_005945 Bacillus anthracis str. Sterne, complete genome.	0	37100	0	0	0.0003228	0	37100	0.000101739
637000028	NC_005955 Bartonella quintana str. Toulouse, complete genome.	0	37100	0	0	0.0003228	0	37100	0.000101739
637000030	NC_005363 Bdellovibrio bacteriovorus HD100, complete genome.	0	37100	0	0	0.0003228	0	37100	0.000101739
637000038	NC_004463 Bradyrhizobium japonicum USDA 110, complete genome.	0	37100	0	0	0.0003228	0	37100	0.000101739
637000052	NC_007650 Burkholderia thailandensis E264 chromosome II, complete sequence.	0	37100	0	0	0.0003228	0	37100	0.000101739
637000056	NC_005061 Candidatus Blochmannia floridanus, complete genome.	0	37100	0	0	0.0003228	0	37100	0.000101739
637000061	NC_002696 Caulobacter crescentus CB15, complete genome.	0	37100	0	0	0.0003228	0	37100	0.000101739
637000074	NC_005085 Chromobacterium violaceum ATCC 12472, complete genome.	0	37100	0	0	0.0003228	0	37100	0.000101739
637000088	NC_007298 Dechloromonas aromatica RCB, complete genome.	0	37100	0	0	0.0003228	0	37100	0.000101739
637000098	NC_007799 Ehrlichia chaffeensis str. Arkansas, complete genome.	0	37100	0	0	0.0003228	0	37100	0.000101739
637000102	NC_004547 Erwinia carotovora subsp. atroseptica SCRI1043, complete genome.	0	37100	0	0	0.0003228	0	37100	0.000101739
637000114	NC_006570 Francisella tularensis subsp. tularensis Schu 4, complete genome.	0	37100	0	0	0.0003228	0	37100	0.000101739
637000115	NC_008278 Frankia alni ACN14a, complete genome.	0	37100	0	0	0.0003228	0	37100	0.000101739
637000119	NC_007515 Geobacter metallireducens GS-15 plasmid unnamed, complete sequence.	0	37100	0	0	0.0003228	0	37100	0.000101739
637000123	NC_008343 Granulobacter bethesdensis CGDNIH1, complete genome.	0	37100	0	0	0.0003228	0	37100	0.000101739
637000124	NC_002940 Haemophilus ducreyi 35000HP, complete genome.	0	37100	0	0	0.0003228	0	37100	0.000101739
637000128	NC_007645 Hahella chejuensis KCTC 2396, complete genome.	0	37100	0	0	0.0003228	0	37100	0.000101739
637000129	NC_008212 Haloquadratum walsbyi DSM 16790, complete genome.	0	37100	0	0	0.0003228	0	37100	0.000101739
637000131	NC_004917 Helicobacter hepaticus ATCC 51449, complete genome.	0	37100	0	0	0.0003228	0	37100	0.000101739
637000135	NC_008358 Hyphomonas neptunium ATCC 15444, complete genome.	0	37100	0	0	0.0003228	0	37100	0.000101739
637000152	NC_003212 Listeria innocua Clip11262, complete genome.	0	37100	0	0	0.0003228	0	37100	0.000101739
637000155	NC_007626 Magnetospirillum magneticum AMB-1, complete genome.	0	37100	0	0	0.0003228	0	37100	0.000101739
637000161	NC_007955 Methanococcoides burtonii DSM 6242, complete genome.	0	37100	0	0	0.0003228	0	37100	0.000101739
637000165	NC_007947 Methylobacillus flagellatus KT, complete genome.	0	37100	0	0	0.0003228	0	37100	0.000101739
637000175	NC_004829 Mycoplasma gallisepticum R, complete genome.	0	37100	0	0	0.0003228	0	37100	0.000101739
637000176	NC_000908 Mycoplasma genitalium G37, complete genome.	0	37100	0	0	0.0003228	0	37100	0.000101739
637000183	NC_000912 Mycoplasma pneumoniae M129, complete genome.	0	37100	0	0	0.0003228	0	37100	0.000101739
637000198	NC_006361 Nocardia farcinica IFM 10152, complete genome.	0	37100	0	0	0.0003228	0	37100	0.000101739
637000201	NC_004193 Oceanobacillus iheyensis HTE831, complete genome.	0	37100	0	0	0.0003228	0	37100	0.000101739
637000205	NC_007512 Pelodictyon luteolum DSM 273, complete genome.	0	37100	0	0	0.0003228	0	37100	0.000101739
637000207	NC_005126 Photorhabdus luminescens subsp. laumondii TTO1, complete genome.	0	37100	0	0	0.0003228	0	37100	0.000101739
637000208	NC_007948 Polaromonas sp. JS666, complete genome.	0	37100	0	0	0.0003228	0	37100	0.000101739
637000209	NC_002950 Porphyromonas gingivalis W83, complete genome.	0	37100	0	0	0.0003228	0	37100	0.000101739
637000227	NC_007968 Psychrobacter cryohalolentis K5 plasmid 1, complete sequence.	0	37100	0	0	0.0003228	0	37100	0.000101739
637000244	NC_007109 Rickettsia felis URRWXCal2, complete genome.	0	37100	0	0	0.0003228	0	37100	0.000101739
637000249	NC_007912 Saccharophagus degradans 2-40, complete genome.	0	37100	0	0	0.0003228	0	37100	0.000101739
637000258	NC_004347 Shewanella oneidensis MR-1, complete genome.	0	37100	0	0	0.0003228	0	37100	0.000101739
637000260	NC_008320 Shewanella sp. MR-7 plasmid1, complete sequence.	0	37100	0	0	0.0003228	0	37100	0.000101739
637000261	NC_007608 Shigella boydii Sb227 plasmid pSB4_227, complete sequence.	0	37100	0	0	0.0003228	0	37100	0.000101739
637000270	NC_007712 Sodalis glossinidius str. 'morsitans', complete genome.	0	37100	0	0	0.0003228	0	37100	0.000101739
637000316	NC_008346 Syntrophomonas wolfei subsp. wolfei str. Goettingen, complete genome.	0	37100	0	0	0.0003228	0	37100	0.000101739
637000318	NC_003869 Thermoanaerobacter tengcongensis MB4, complete genome.	0	37100	0	0	0.0003228	0	37100	0.000101739
637000319	NC_007333 Thermobifida fusca YX, complete genome.	0	37100	0	0	0.0003228	0	37100	0.000101739
637000321	NC_000853 Thermotoga maritima MSB8, complete genome.	0	37100	0	0	0.0003228	0	37100	0.000101739
637000323	NC_006461 Thermus thermophilus HB8, complete genome.	0	37100	0	0	0.0003228	0	37100	0.000101739
637000324	NC_007404 Thiobacillus denitrificans ATCC 25259, complete genome.	0	37100	0	0	0.0003228	0	37100	0.000101739
637000326	NC_007575 Thiomicrospira denitrificans ATCC 33889, complete genome.	0	37100	0	0	0.0003228	0	37100	0.000101739
637000333	NC_002505 Vibrio cholerae O1 biovar eltor str. N16961 chromosome I, complete sequence.	0	37100	0	0	0.0003228	0	37100	0.000101739
637000338	NC_003425 Wigglesworthia glossinidia endosymbiont of Glossina brevipalpis plasmid pWb1, complete sequence.	0	37100	0	0	0.0003228	0	37100	0.000101739
638154501	BA000002 Aeropyrum pernix K1 DNA, complete genome.	0	37100	0	0	0.0003228	0	37100	0.000101739
638154505	NC_000909 Methanocaldococcus jannaschii DSM 2661, complete genome.	0	37100	0	0	0.0003228	0	37100	0.000101739
638154511	AE017199 Nanoarchaeum equitans Kin4-M, complete genome.	0	37100	0	0	0.0003228	0	37100	0.000101739
638154519	BA000023 Sulfolobus tokodaii str. 7 DNA, complete genome.	0	37100	0	0	0.0003228	0	37100	0.000101739
638154520	NC_006624 Thermococcus kodakaraensis KOD1, complete genome.	0	37100	0	0	0.0003228	0	37100	0.000101739
638154521	AL139299 Thermoplasma acidophilum DSM 1728 complete genome.	0	37100	0	0	0.0003228	0	37100	0.000101739
639279307	NC_003450 Corynebacterium glutamicum ATCC 13032, complete genome.	0	37100	0	0	0.0003228	0	37100	0.000101739
639279312	NC_008435 Rhodopseudomonas palustris BisA53, complete genome.	0	37100	0	0	0.0003228	0	37100	0.000101739
639633006	NC_008537 Arthrobacter sp. FB24 plasmid 1, complete sequence.	0	37100	0	0	0.0003228	0	37100	0.000101739
639633016	NC_008599 Campylobacter fetus subsp. fetus 82-40, complete genome.	0	37100	0	0	0.0003228	0	37100	0.000101739
639633019	NC_008610 Candidatus Ruthia magnifica str. Cm (Calyptogena magnifica), complete genome.	0	37100	0	0	0.0003228	0	37100	0.000101739
639633026	NC_008789 Halorhodospira halophila SL1, complete genome.	0	37100	0	0	0.0003228	0	37100	0.000101739
639633036	NC_008576 Magnetococcus sp. MC-1, complete genome.	0	37100	0	0	0.0003228	0	37100	0.000101739
639633047	NC_008528 Oenococcus oeni PSU-1, complete genome.	0	37100	0	0	0.0003228	0	37100	0.000101739
639633060	NC_008536 Solibacter usitatus Ellin6076, complete genome.	0	37100	0	0	0.0003228	0	37100	0.000101739
640069305	NC_009076 Burkholderia pseudomallei 1106a chromosome I, complete sequence.	0	37100	0	0	0.0003228	0	37100	0.000101739
640069331	NC_009092 Shewanella loihica PV-4, complete genome.	0	37100	0	0	0.0003228	0	37100	0.000101739
640069332	NC_009033 Staphylothermus marinus F1, complete genome.	0	37100	0	0	0.0003228	0	37100	0.000101739
640427103	NC_009475 Bradyrhizobium sp. BTAi1 plasmid pBBta01, complete sequence.	0	37100	0	0	0.0003228	0	37100	0.000101739
640427105	NC_009504 Brucella ovis ATCC 25840 chromosome II, complete sequence.	0	37100	0	0	0.0003228	0	37100	0.000101739
640427107	NC_009465 Candidatus Vesicomyosocius okutanii HA, complete genome.	0	37100	0	0	0.0003228	0	37100	0.000101739
640427111	NC_009455 Dehalococcoides sp. BAV1, complete genome.	0	37100	0	0	0.0003228	0	37100	0.000101739
640427115	NC_009483 Geobacter uraniumreducens Rf4, complete genome.	0	37100	0	0	0.0003228	0	37100	0.000101739
640427118	NC_009513 Lactobacillus reuteri F275, complete genome.	0	37100	0	0	0.0003228	0	37100	0.000101739
640427121	NC_009515 Methanobrevibacter smithii ATCC 35061, complete genome.	0	37100	0	0	0.0003228	0	37100	0.000101739
640427123	NC_009565 Mycobacterium tuberculosis F11, complete genome.	0	37100	0	0	0.0003228	0	37100	0.000101739
640427129	NC_009379 Polynucleobacter sp. QLW-P1DMWA-1, complete genome.	0	37100	0	0	0.0003228	0	37100	0.000101739
640427139	NC_009523 Roseiflexus sp. RS-1, complete genome.	0	37100	0	0	0.0003228	0	37100	0.000101739
640427141	NC_009438 Shewanella putrefaciens CN-32, complete genome.	0	37100	0	0	0.0003228	0	37100	0.000101739
640427147	NC_009443 Streptococcus suis 98HAH33, complete genome.	0	37100	0	0	0.0003228	0	37100	0.000101739
640753001	NC_009655 Actinobacillus succinogenes 130Z, complete genome.	0	37100	0	0	0.0003228	0	37100	0.000101739
640753002	NC_009633 Alkaliphilus metalliredigens QYMF, complete genome.	0	37100	0	0	0.0003228	0	37100	0.000101739
640753010	NC_009715 Campylobacter curvus 525.92, complete genome.	0	37100	0	0	0.0003228	0	37100	0.000101739
640753016	NC_009617 Clostridium beijerinckii NCIMB 8052, complete genome.	0	37100	0	0	0.0003228	0	37100	0.000101739
640753021	NC_009726 Coxiella burnetii Dugway 7E9-12 plasmid pQpDG, complete sequence.	0	37100	0	0	0.0003228	0	37100	0.000101739
640753034	NC_009635 Methanococcus aeolicus Nankai-3, complete genome.	0	37100	0	0	0.0003228	0	37100	0.000101739
640753036	NC_009634 Methanococcus vannielii SB, complete genome.	0	37100	0	0	0.0003228	0	37100	0.000101739
640753037	NC_009662 Nitratiruptor sp. SB155-2, complete genome.	0	37100	0	0	0.0003228	0	37100	0.000101739
640753048	NC_009829 Serratia proteamaculans 568 plasmid pSPRO01, complete sequence.	0	37100	0	0	0.0003228	0	37100	0.000101739
640753050	NC_009831 Shewanella sediminis HAW-EB3, complete genome.	0	37100	0	0	0.0003228	0	37100	0.000101739
641228475	NC_009922 Alkaliphilus oremlandii OhILAs, complete genome.	0	37100	0	0	0.0003228	0	37100	0.000101739
641228478	NC_010160 Bartonella tribocorum CIP 105476 plasmidBtr, complete sequence.	0	37100	0	0	0.0003228	0	37100	0.000101739
641228504	NC_009953 Salinispora arenicola CNS-205, complete genome.	0	37100	0	0	0.0003228	0	37100	0.000101739
641228511	NC_009828 Thermotoga lettingae TMO, complete genome.	0	37100	0	0	0.0003228	0	37100	0.000101739
641522601	NC_010163 Acholeplasma laidlawii PG-8A, complete genome.	0	37100	0	0	0.0003228	0	37100	0.000101739
641522607	NC_010645 Bordetella avium 197N, complete genome.	0	37100	0	0	0.0003228	0	37100	0.000101739
641522627	NC_010371 Finegoldia magna ATCC 29328 plasmid pFMC, complete sequence.	0	37100	0	0	0.0003228	0	37100	0.000101739
641522632	NC_010337 Heliobacterium modesticaldum Ice1, complete genome.	0	37100	0	0	0.0003228	0	37100	0.000101739
641522637	NC_010381 Lysinibacillus sphaericus C3-41 plasmid pBsph, complete sequence.	0	37100	0	0	0.0003228	0	37100	0.000101739
641522639	NC_010373 Methylobacterium sp. 4-46 plasmid pM44601, complete sequence.	0	37100	0	0	0.0003228	0	37100	0.000101739
641522643	NC_010571 Opitutus terrae PB90-1, complete genome.	0	37100	0	0	0.0003228	0	37100	0.000101739
641522648	NC_010334 Shewanella halifaxensis HAW-EB4, complete genome.	0	37100	0	0	0.0003228	0	37100	0.000101739
641522656	NC_010320 Thermoanaerobacter sp. X514, complete genome.	0	37100	0	0	0.0003228	0	37100	0.000101739
642555105	NC_011138 Alteromonas macleodii 'Deep ecotype', complete genome.	0	37100	0	0	0.0003228	0	37100	0.000101739
642555106	NC_011145 Anaeromyxobacter sp. K, complete genome.	0	37100	0	0	0.0003228	0	37100	0.000101739
642555109	NC_008710 Borrelia turicatae 91E135, complete genome.	0	37100	0	0	0.0003228	0	37100	0.000101739
642555119	NC_010995 Cellvibrio japonicus Ueda107, complete genome.	0	37100	0	0	0.0003228	0	37100	0.000101739
642555121	NC_010803 Chlorobium limicola DSM 245, complete genome.	0	37100	0	0	0.0003228	0	37100	0.000101739
642555126	NC_008262 Clostridium perfringens SM101, complete genome.	0	37100	0	0	0.0003228	0	37100	0.000101739
642555129	NC_011146 Geobacter bemidjiensis Bem, complete genome.	0	37100	0	0	0.0003228	0	37100	0.000101739
642555130	NC_010814 Geobacter lovleyi SZ, complete genome.	0	37100	0	0	0.0003228	0	37100	0.000101739
642555133	NC_010617 Kocuria rhizophila DC2201, complete genome.	0	37100	0	0	0.0003228	0	37100	0.000101739
642555140	NC_005916 Mycobacterium ulcerans AGY99 plasmid pMUM001, complete sequence.	0	37100	0	0	0.0003228	0	37100	0.000101739
642555141	NC_011025 Mycoplasma arthritidis 158L3-1, complete genome.	0	37100	0	0	0.0003228	0	37100	0.000101739
642555162	NC_011071 Stenotrophomonas maltophilia R551-3, complete genome.	0	37100	0	0	0.0003228	0	37100	0.000101739
642555165	NC_010730 Sulfurihydrogenibium sp. YO3AOP1, complete genome.	0	37100	0	0	0.0003228	0	37100	0.000101739
643348508	NC_011567 Anoxybacillus flavithermus WK1, complete genome.	0	37100	0	0	0.0003228	0	37100	0.000101739
643348528	NC_011898 Clostridium cellulolyticum H10, complete genome.	0	37100	0	0	0.0003228	0	37100	0.000101739
643348541	NC_011992 Diaphorobacter sp. TPSY, complete genome.	0	37100	0	0	0.0003228	0	37100	0.000101739
643348557	NC_011899 Halothermothrix orenii H 168, complete genome.	0	37100	0	0	0.0003228	0	37100	0.000101739
643348574	NC_011663 Shewanella baltica OS223, complete genome.	0	37100	0	0	0.0003228	0	37100	0.000101739
643348581	NC_011296 Thermodesulfovibrio yellowstonii DSM 11347, complete genome.	0	37100	0	0	0.0003228	0	37100	0.000101739
643348585	NC_011901 Thioalkalivibrio sp. HL-EbGR7, complete genome.	0	37100	0	0	0.0003228	0	37100	0.000101739
643692014	NC_012039 Campylobacter lari RM2100, complete genome.	0	37100	0	0	0.0003228	0	37100	0.000101739
643692021	NC_012108 Desulfobacterium autotrophicum HRM2, complete genome.	0	37100	0	0	0.0003228	0	37100	0.000101739
643692039	NC_012470 Streptococcus equi subsp. zooepidemicus, complete genome.	0	37100	0	0	0.0003228	0	37100	0.000101739
643692051	NC_011662 Thauera sp. MZ1T, complete genome.	0	37100	0	0	0.0003228	0	37100	0.000101739
643692052	NC_012691 Tolumonas auensis DSM 9187, complete genome.	0	37100	0	0	0.0003228	0	37100	0.000101739
644736322	NC_013124 Acidimicrobium ferrooxidans DSM 10331, complete genome.	0	37100	0	0	0.0003228	0	37100	0.000101739
644736324	NC_012913 Aggregatibacter aphrophilus NJ8700, complete genome.	0	37100	0	0	0.0003228	0	37100	0.000101739
644736332	NC_013118 Brucella microti CCM 4915 chromosome 2, complete genome.	0	37100	0	0	0.0003228	0	37100	0.000101739
644736336	NC_012985 Candidatus Liberibacter asiaticus str. psy62, complete genome.	0	37100	0	0	0.0003228	0	37100	0.000101739
644736338	NC_013162 Capnocytophaga ochracea DSM 7271, complete genome.	0	37100	0	0	0.0003228	0	37100	0.000101739
644736340	NC_013132 Chitinophaga pinensis DSM 2588, complete genome.	0	37100	0	0	0.0003228	0	37100	0.000101739
644736349	NC_013223 Desulfohalobium retbaense DSM 5692, complete genome.	0	37100	0	0	0.0003228	0	37100	0.000101739
644736350	NC_013173 Desulfomicrobium baculatum DSM 4028, complete genome.	0	37100	0	0	0.0003228	0	37100	0.000101739
644736351	NC_013216 Desulfotomaculum acetoxidans DSM 771, complete genome.	0	37100	0	0	0.0003228	0	37100	0.000101739
644736354	NC_012880 Dickeya dadantii Ech703, complete genome.	0	37100	0	0	0.0003228	0	37100	0.000101739
644736358	NC_013204 Eggerthella lenta DSM 2243, complete genome.	0	37100	0	0	0.0003228	0	37100	0.000101739
644736373	NC_013158 Halorhabdus utahensis DSM 12940, complete genome.	0	37100	0	0	0.0003228	0	37100	0.000101739
644736375	NC_012982 Hirschia baltica ATCC 49814, complete genome.	0	37100	0	0	0.0003228	0	37100	0.000101739
644736379	NC_012785 Kosmotoga olearia TBF 19.5.1, complete genome.	0	37100	0	0	0.0003228	0	37100	0.000101739
644736381	NC_012984 Lactobacillus plantarum JDM1, complete genome.	0	37100	0	0	0.0003228	0	37100	0.000101739
644736382	NC_013198 Lactobacillus rhamnosus GG, complete genome.	0	37100	0	0	0.0003228	0	37100	0.000101739
644736399	NC_012961 Photorhabdus asymbiotica plasmid pPAT, complete sequence.	0	37100	0	0	0.0003228	0	37100	0.000101739
644736405	NC_013165 Slackia heliotrinireducens DSM 20476, complete genome.	0	37100	0	0	0.0003228	0	37100	0.000101739
644736412	NC_012883 Thermococcus sibiricus MM 739, complete genome.	0	37100	0	0	0.0003228	0	37100	0.000101739
646311901	NC_013740 Acidaminococcus fermentans DSM 20731, complete genome.	0	37100	0	0	0.0003228	0	37100	0.000101739
646311904	NC_013385 Ammonifex degensii KC4, complete genome.	0	37100	0	0	0.0003228	0	37100	0.000101739
646311932	NC_013441 Gordonia bronchialis DSM 43247, complete genome.	0	37100	0	0	0.0003228	0	37100	0.000101739
646311938	NC_013729 Kribbella flavida DSM 17836, complete genome.	0	37100	0	0	0.0003228	0	37100	0.000101739
646311944	NC_013407 Methanocaldococcus vulcanius M7, complete genome.	0	37100	0	0	0.0003228	0	37100	0.000101739
646311950	NC_013222 Robiginitalea biformata HTCC2501, complete genome.	0	37100	0	0	0.0003228	0	37100	0.000101739
646311964	NC_013642 Thermotoga naphthophila RKU-10, complete genome.	0	37100	0	0	0.0003228	0	37100	0.000101739
646564502	NC_013851 Allochromatium vinosum DSM 180 chromosome, complete genome.	0	37100	0	0	0.0003228	0	37100	0.000101739
646564519	NC_014100 Caulobacter segnis ATCC 21756 chromosome, complete genome.	0	37100	0	0	0.0003228	0	37100	0.000101739
646564527	NC_013943 Denitrovibrio acetiphilus DSM 12809 chromosome, complete genome.	0	37100	0	0	0.0003228	0	37100	0.000101739
646564534	NC_013849 Ferroglobus placidus DSM 10642 chromosome, complete genome.	0	37100	0	0	0.0003228	0	37100	0.000101739
646564548	NC_013887 Methanocaldococcus sp. FS406-22 chromosome, complete genome.	0	37100	0	0	0.0003228	0	37100	0.000101739
646564552	NC_014147 Moraxella catarrhalis RH4 chromosome, complete genome.	0	37100	0	0	0.0003228	0	37100	0.000101739
646564559	NC_014148 Planctomyces limnophilus DSM 3776 chromosome, complete genome.	0	37100	0	0	0.0003228	0	37100	0.000101739
646564566	NC_014168 Segniliparus rotundus DSM 44985 chromosome, complete genome.	0	37100	0	0	0.0003228	0	37100	0.000101739
646564577	NC_014220 Syntrophothermus lipocalidus DSM 12680 chromosome, complete genome.	0	37100	0	0	0.0003228	0	37100	0.000101739
646564581	NC_014165 Thermobispora bispora DSM 43833 chromosome, complete genome.	0	37100	0	0	0.0003228	0	37100	0.000101739
646564586	NC_014221 Truepera radiovictrix DSM 17093 chromosome, complete genome.	0	37100	0	0	0.0003228	0	37100	0.000101739
646564587	NC_014158 Tsukamurella paurometabola DSM 20162 chromosome, complete genome.	0	37100	0	0	0.0003228	0	37100	0.000101739
646862346	CP002047 Streptomyces bingchenggensis BCW-1, complete genome.	0	37100	0	0	0.0003228	0	37100	0.000101739
648028002	NC_014378 Acetohalobium arabaticum DSM 5501 chromosome, complete genome.	0	37100	0	0	0.0003228	0	37100	0.000101739
648028003	NC_014374 Acidilobus saccharovorans 345-15 chromosome, complete genome.	0	37100	0	0	0.0003228	0	37100	0.000101739
648028013	NC_014392 Caldicellulosiruptor obsidiansis OB47 chromosome, complete genome.	0	37100	0	0	0.0003228	0	37100	0.000101739
648028016	NC_014393 Clostridium cellulovorans 743B chromosome, complete genome.	0	37100	0	0	0.0003228	0	37100	0.000101739
648028017	NC_014328 Clostridium ljungdahlii DSM 13528 chromosome, complete genome.	0	37100	0	0	0.0003228	0	37100	0.000101739
648028023	NC_014365 Desulfarculus baarsii DSM 2075 chromosome, complete genome.	0	37100	0	0	0.0003228	0	37100	0.000101739
648028026	NC_014541 Ferrimonas balearica DSM 9799 chromosome, complete genome.	0	37100	0	0	0.0003228	0	37100	0.000101739
648028027	NC_014472 Flavobacteriales bacterium HTCC2170 chromosome, complete genome.	0	37100	0	0	0.0003228	0	37100	0.000101739
648028028	NC_014394 Gallionella capsiferriformans ES-2 chromosome, complete genome.	0	37100	0	0	0.0003228	0	37100	0.000101739
648028034	NC_014313 Hyphomicrobium denitrificans ATCC 51888 chromosome, complete genome.	0	37100	0	0	0.0003228	0	37100	0.000101739
648028042	NC_014391 Micromonospora aurantiaca ATCC 27029 chromosome, complete genome.	0	37100	0	0	0.0003228	0	37100	0.000101739
648028043	NC_014246 Mobiluncus curtisii ATCC 43063 chromosome, complete genome.	0	37100	0	0	0.0003228	0	37100	0.000101739
648028045	NC_014448 Mycoplasma hyorhinis HUB-1 chromosome, complete genome.	0	37100	0	0	0.0003228	0	37100	0.000101739
648028049	NC_014258 Pantoea vagans C9-1 plasmid pPag3, complete sequence.	0	37100	0	0	0.0003228	0	37100	0.000101739
648231714	CP002107 Mycoplasma mycoides subsp. mycoides SC str. Gladysdale MU clone SC5, complete genome.	0	37100	0	0	0.0003228	0	37100	0.000101739
649633001	NC_014640 Achromobacter xylosoxidans A8 chromosome, complete genome.	0	37100	0	0	0.0003228	0	37100	0.000101739
649633006	NC_014548 Arthrobacter arilaitensis Re117 plasmid pRE117-2, complete sequence.	0	37100	0	0	0.0003228	0	37100	0.000101739
649633015	NC_014638 Bifidobacterium bifidum PRL2010 chromosome, complete genome.	0	37100	0	0	0.0003228	0	37100	0.000101739
649633024	NC_014720 Caldicellulosiruptor kronotskyensis 2002 chromosome, complete genome.	0	37100	0	0	0.0003228	0	37100	0.000101739
649633025	NC_014657 Caldicellulosiruptor owensensis OL chromosome, complete genome.	0	37100	0	0	0.0003228	0	37100	0.000101739
649633034	NC_014958 Deinococcus maricopensis DSM 21211 chromosome, complete genome.	0	37100	0	0	0.0003228	0	37100	0.000101739
649633036	NC_014972 Desulfobulbus propionicus DSM 2032 chromosome, complete genome.	0	37100	0	0	0.0003228	0	37100	0.000101739
649633057	NC_014830 Intrasporangium calvum DSM 43043 chromosome, complete genome.	0	37100	0	0	0.0003228	0	37100	0.000101739
649633065	NC_014750 Marivirga tractuosa DSM 4126 plasmid pFTRAC01, complete sequence.	0	37100	0	0	0.0003228	0	37100	0.000101739
649633071	NC_014760 Mycoplasma bovis PG45 chromosome, complete genome.	0	37100	0	0	0.0003228	0	37100	0.000101739
649633077	NC_014753 Oceanithermus profundus DSM 14977 plasmid pOCEPR01, complete sequence.	0	37100	0	0	0.0003228	0	37100	0.000101739
649633080	NC_014734 Paludibacter propionicigenes WB4 chromosome, complete genome.	0	37100	0	0	0.0003228	0	37100	0.000101739
649633083	NC_015174 Planctomyces brasiliensis DSM 5305 chromosome, complete genome.	0	37100	0	0	0.0003228	0	37100	0.000101739
649633087	NC_014924 Pseudoxanthomonas suwonensis 11-1 chromosome, complete genome.	0	37100	0	0	0.0003228	0	37100	0.000101739
649633089	NC_014659 Rhodococcus equi 103S, complete genome.	0	37100	0	0	0.0003228	0	37100	0.000101739
649633093	NC_014643 Rothia dentocariosa ATCC 17931 chromosome, complete genome.	0	37100	0	0	0.0003228	0	37100	0.000101739
649633099	NC_014914 Taylorella equigenitalis MCE9 chromosome, complete genome.	0	37100	0	0	0.0003228	0	37100	0.000101739
649633100	NC_014963 Terriglobus saanensis SP1PR4 chromosome, complete genome.	0	37100	0	0	0.0003228	0	37100	0.000101739
649633107	NC_014965 Vibrio vulnificus MO6-24/O chromosome chromosome I, complete sequence.	0	37100	0	0	0.0003228	0	37100	0.000101739
649633108	NC_014170 Xenorhabdus nematophila ATCC 19061 plasmid XNC1_p, complete sequence.	0	37100	0	0	0.0003228	0	37100	0.000101739
650377911	FP929033 Bacteroides xylanisolvens XB1A draft genome.	0	37100	0	0	0.0003228	0	37100	0.000101739
650377923	FP929037 Clostridium saccharolyticum-like K10 draft genome.	0	37100	0	0	0.0003228	0	37100	0.000101739
650377926	FP929039 Coprococcus sp. ART55/1 draft genome.	0	37100	0	0	0.0003228	0	37100	0.000101739
650377948	CP002175 Halanaerobium praevalens DSM 2228, complete genome.	0	37100	0	0	0.0003228	0	37100	0.000101739
650377964	FP929049 Roseburia intestinalis M50/1 draft genome.	0	37100	0	0	0.0003228	0	37100	0.000101739
650377975	CP002215 Streptococcus dysgalactiae subsp. equisimilis ATCC 12394, complete genome.	0	37100	0	0	0.0003228	0	37100	0.000101739
650377991	CP001978 Marine bacterium HP15, complete genome.	0	37100	0	0	0.0003228	0	37100	0.000101739
650716001	NC_015518 Acidianus hospitalis W1 chromosome, complete genome.	0	37100	0	0	0.0003228	0	37100	0.000101739
650716005	NC_015278 Aerococcus urinae ACS-120-V-Col10a chromosome, complete genome.	0	37100	0	0	0.0003228	0	37100	0.000101739
650716007	NC_015183 Agrobacterium sp. H13-3 chromosome, complete genome.	0	37100	0	0	0.0003228	0	37100	0.000101739
650716017	NC_015380 Candidatus Pelagibacter sp. IMCC9063 chromosome, complete genome.	0	37100	0	0	0.0003228	0	37100	0.000101739
650716035	NC_015663 Enterobacter aerogenes KCTC 2190 chromosome, complete genome.	0	37100	0	0	0.0003228	0	37100	0.000101739
650716036	NC_015601 Erysipelothrix rhusiopathiae str. Fujisawa, complete genome.	0	37100	0	0	0.0003228	0	37100	0.000101739
650716038	NC_015460 Gallibacterium anatis UMN179 chromosome, complete genome.	0	37100	0	0	0.0003228	0	37100	0.000101739
650716043	NC_015496 Krokinobacter sp. 4H-3-7-5 chromosome, complete genome.	0	37100	0	0	0.0003228	0	37100	0.000101739
650716054	NC_015416 Methanosaeta concilii GP6 chromosome, complete genome.	0	37100	0	0	0.0003228	0	37100	0.000101739
650716058	NC_015635 Microlunatus phosphovorus NM-1, complete genome.	0	37100	0	0	0.0003228	0	37100	0.000101739
650716059	NC_015758 Mycobacterium africanum GM041182 chromosome, complete genome.	0	37100	0	0	0.0003228	0	37100	0.000101739
650716074	NC_015379 Pseudomonas brassicacearum subsp. brassicacearum NFM421 chromosome, complete genome.	0	37100	0	0	0.0003228	0	37100	0.000101739
650716079	NC_015474 Pyrococcus sp. NA2 chromosome, complete genome.	0	37100	0	0	0.0003228	0	37100	0.000101739
650716081	NC_015677 Ramlibacter tataouinensis TTB310 chromosome, complete genome.	0	37100	0	0	0.0003228	0	37100	0.000101739
650716085	NC_015710 Simkania negevensis Z plasmid pSn, complete sequence.	0	37100	0	0	0.0003228	0	37100	0.000101739
650716088	NC_015291 Streptococcus oralis Uo5, complete genome.	0	37100	0	0	0.0003228	0	37100	0.000101739
650716094	NC_015519 Tepidanaerobacter sp. Re1 chromosome, complete genome.	0	37100	0	0	0.0003228	0	37100	0.000101739
650716099	NC_015577 Treponema azotonutricium ZAS-9 chromosome, complete genome.	0	37100	0	0	0.0003228	0	37100	0.000101739
650716101	NC_015714 Treponema paraluiscuniculi Cuniculi A chromosome, complete genome.	0	37100	0	0	0.0003228	0	37100	0.000101739
651053005	CP002743 Bifidobacterium breve ACS-071-V-Sch8b, complete genome.	0	37100	0	0	0.0003228	0	37100	0.000101739
651053016	CP002804 Chlamydophila psittaci C19/98, complete genome.	0	37100	0	0	0.0003228	0	37100	0.000101739
651053026	CP002557 Francisella cf. novicida Fx1, complete genome.	0	37100	0	0	0.0003228	0	37100	0.000101739
651053071	FR870271 Staphylococcus lugdunensis N920143 complete genome.	0	37100	0	0	0.0003228	0	37100	0.000101739
651053074	FR873482 Streptococcus salivarius JIM8777 complete genome.	0	37100	0	0	0.0003228	0	37100	0.000101739
2501416926	Aact_AACT Aggregatibacter actinomycetemcomitans HK1651 : Aact_AACT	0	37100	0	0	0.0003228	0	37100	0.000101739
2501533205	Dpe_Contig10255 Dethiosulfovibrio peptidovorans SEBR 4207, DSM 11002 : Dpe_Contig10255	0	37100	0	0	0.0003228	0	37100	0.000101739
2503508007	Tther_Contig212 Thermotoga thermarum LA3, DSM 5069 : Tther_Contig212	0	37100	0	0	0.0003228	0	37100	0.000101739
2503707007	Ftaff_Contig130 Fluviicola taffensis RW262, DSM 16823 : Ftaff_Contig130	0	37100	0	0	0.0003228	0	37100	0.000101739
2503982034	Pnec_NC_010531 Polynucleobacter necessarius STIR1 (Endosymbiont) : Pnec_NC_010531	0	37100	0	0	0.0003228	0	37100	0.000101739
2504643023	CCsub_BA000048_1 Candidatus Caldiarchaeum subterraneum : CCsub_BA000048_1	0	37100	0	0	0.0003228	0	37100	0.000101739
2505679031	Contig12 Rubrobacter radiotolerans DSM 5868 : Contig12	0	37100	0	0	0.0003228	0	37100	0.000101739
2506783044	Bresa_Contig123 Brenneria salicis ATCC 15712 : Bresa_Contig123	0	37100	0	0	0.0003228	0	37100	0.000101739
2507262044	HydSN_Contig206.1 Hydrogenobaculum sp. SN : HydSN_Contig206.1	0	37100	0	0	0.0003228	0	37100	0.000101739
2508501019	HAL_scaffold00002.1 Haloferax mediterranei R-4, ATCC 33500 : HAL_scaffold00002.1	0	37100	0	0	0.0003228	0	37100	0.000101739
2508501107	ThimaDRAFT_TMF.1 Thiocapsa marina 5811, DSM 5653 : ThimaDRAFT_TMF.1	0	37100	0	0	0.0003228	0	37100	0.000101739
2509276051	Clo1100_Contig198.1 Clostridium sp. BNL1100 : Clo1100_Contig198.1	0	37100	0	0	0.0003228	0	37100	0.000101739
2509276059	Fleli_Contig445.1 Flexibacter litoralis Fx l1, DSM 6794 : Fleli_Contig445.1	0	37100	0	0	0.0003228	0	37100	0.000101739
2509276063	Aeqsu_Contig157.1 Aequorivita sublithincola QSSC9-3, DSM 14238 : Aeqsu_Contig157.1	0	37100	0	0	0.0003228	0	37100	0.000101739
2509276067	Barvi_Contig77.1 Barnesiella viscericola C46, DSM 18177 : Barvi_Contig77.1	0	37100	0	0	0.0003228	0	37100	0.000101739
2509601035	Alfi_Contig80.1 Alistipes finegoldii AHN 2437, DSM 17242 : Alfi_Contig80.1	0	37100	0	0	0.0003228	0	37100	0.000101739
2510065016	Dehre_Contig93.1 Dehalobacter restrictus DSM 9455 : Dehre_Contig93.1	0	37100	0	0	0.0003228	0	37100	0.000101739
2510065046	MetacDRAFT_Contig20.1 Methylocapsa acidiphila B2 : MetacDRAFT_Contig20.1	0	37100	0	0	0.0003228	0	37100	0.000101739
2510065050	Marpu_Contig45.1 Marichromatium purpuratum 987 : Marpu_Contig45.1	0	37100	0	0	0.0003228	0	37100	0.000101739
2510436004	CP002457 Shewanella putrefaciens 200 (Missing data) : CP002457	0	37100	0	0	0.0003228	0	37100	0.000101739
2510461022	Natgr_Contig127.1 Natronobacterium gregoryi SP2, DSM 3393 : Natgr_Contig127.1	0	37100	0	0	0.0003228	0	37100	0.000101739
2510461070	Terro_Contig51.1 Terriglobus roseus KBS 63, DSM 18391 : Terro_Contig51.1	0	37100	0	0	0.0003228	0	37100	0.000101739
2511231083	NC_016786 Corynebacterium diphtheriae HC01 : NC_016786	0	37100	0	0	0.0003228	0	37100	0.000101739
2511231086	NC_016109 Kitasatospora setae KM-6054, NBRC 14216 : NC_016109	0	37100	0	0	0.0003228	0	37100	0.000101739
2511231094	NC_016002 Pseudogulbenkiania sp. NH8B : NC_016002	0	37100	0	0	0.0003228	0	37100	0.000101739
2511231118	NC_015978 Lactobacillus sanfranciscensis TMW 1.1304 : NC_015978	0	37100	0	0	0.0003228	0	37100	0.000101739
2511231138	CP002401 Chlamydia trachomatis A2497 : CP002401	0	37100	0	0	0.0003228	0	37100	0.000101739
2511231167	CP001221 Leptospira interrogans sv LAI, IPAV : CP001221	0	37100	0	0	0.0003228	0	37100	0.000101739
2511231172	FO082843 Nocardia cyriacigeorgica GUH-2 : FO082843	0	37100	0	0	0.0003228	0	37100	0.000101739
2511231177	AP012048 Arcobacter sp. L : AP012048	0	37100	0	0	0.0003228	0	37100	0.000101739
2511231178	HE617160 Pantoea ananatis LMG 5342 : HE617160	0	37100	0	0	0.0003228	0	37100	0.000101739
2511231188	CP002018 Ketogulonigenium vulgarum WSH-001 : CP002018	0	37100	0	0	0.0003228	0	37100	0.000101739
2511231201	AP009333 Lactococcus garvieae Lg2 : AP009333	0	37100	0	0	0.0003228	0	37100	0.000101739
2512047033	NC_016025 Candidatus Chloracidobacterium thermophilum B : NC_016025	0	37100	0	0	0.0003228	0	37100	0.000101739
2512564032	NC_016936 Saprospira grandis Lewin : NC_016936	0	37100	0	0	0.0003228	0	37100	0.000101739
2512564042	NC_016906 Gordonia polyisoprenivorans VH2, DSM 44266 : NC_016906	0	37100	0	0	0.0003228	0	37100	0.000101739
2512875013	Theru_Contig644.1 Thermocrinis ruber DSM 12173 : Theru_Contig644.1	0	37100	0	0	0.0003228	0	37100	0.000101739
2513237176	NC_017093 Actinoplanes missouriensis NBRC 102363 : NC_017093	0	37100	0	0	0.0003228	0	37100	0.000101739
2513237218	NC_017464 Ignavibacterium album Mat9-16, JCM 16511 : NC_017464	0	37100	0	0	0.0003228	0	37100	0.000101739
2513237219	NC_017663 Escherichia coli P12b : NC_017663	0	37100	0	0	0.0003228	0	37100	0.000101739
2515154212	B158DRAFT_scaffold_0.1 Kangiella aquimarina DSM 16071 : B158DRAFT_scaffold_0.1	0	37100	0	0	0.0003228	0	37100	0.000101739
2516143004	scaffold1 Desulfonatronum lacustre Z-7951, DSM 10312 : scaffold1	0	37100	0	0	0.0003228	0	37100	0.000101739
2516493028	AllstDRAFT_scaffold1.1 Allobaculum stercoricanis DSM 13633 : AllstDRAFT_scaffold1.1	0	37100	0	0	0.0003228	0	37100	0.000101739
2516653042	Salpac5DRAFT_scaffold1.1 Salinispora pacifica DSM 45546 : Salpac5DRAFT_scaffold1.1	0	37100	0	0	0.0003228	0	37100	0.000101739
2516653079	HalalDRAFT_chromosome1.1 Haloglycomyces albus DSM 45210 : HalalDRAFT_chromosome1.1	0	37100	0	0	0.0003228	0	37100	0.000101739
2516653080	MetFAM1DRAFT_chromosome1.1 Methyloversatilis sp. FAM1 : MetFAM1DRAFT_chromosome1.1	0	37100	0	0	0.0003228	0	37100	0.000101739
2517093008	MetviDRAFT_contig1.1 Methanocaldococcus villosus KIN24-T80 : MetviDRAFT_contig1.1	0	37100	0	0	0.0003228	0	37100	0.000101739
2517093012	LeumuDRAFT_contig1.1 Leucothrix mucor DSM 2157 : LeumuDRAFT_contig1.1	0	37100	0	0	0.0003228	0	37100	0.000101739
2517093031	CP003264 Taylorella equigenitalis ATCC 35865 : CP003264	0	37100	0	0	0.0003228	0	37100	0.000101739
2517093038	CP003708 Candidatus Portiera aleyrodidarum BT-B : CP003708	0	37100	0	0	0.0003228	0	37100	0.000101739
2517093043	SucmoDRAFT_scaffold1.1 Succinispira mobilis DSM 6222 : SucmoDRAFT_scaffold1.1	0	37100	0	0	0.0003228	0	37100	0.000101739
		121497178	114931846	128229878	1	1	1	364658902	1

## Sheet: Synthetic contig assignments
Contig ID	Length	TAB	TOC	Verified bin ID	TF-ESOM	GroopM	Genome name	IMG ID
NODE_1_length_220433_cov_306.047028	220517	2537599	18	26	15	58	Candidatus_Methanoregula_boonei_6A8	640753014
NODE_10_length_53960_cov_305.274078	54044	2537599	18	26	15	58	Candidatus_Methanoregula_boonei_6A8	640753014
NODE_11_length_128223_cov_305.758881	128307	2537599	18	26	15	58	Candidatus_Methanoregula_boonei_6A8	640753014
NODE_12_length_83590_cov_305.533173	83674	2537599	18	26	15	58	Candidatus_Methanoregula_boonei_6A8	640753014
NODE_13_length_10918_cov_305.711395	11002	2537599	18	26	15	58	Candidatus_Methanoregula_boonei_6A8	640753014
NODE_14_length_6504_cov_304.605011	6588	2537599	18	26	15	0	Candidatus_Methanoregula_boonei_6A8	640753014
NODE_15_length_989_cov_304.086945	1073	2537599	18	26	0	0	Candidatus_Methanoregula_boonei_6A8	640753014
NODE_2_length_506084_cov_305.887970	506168	2537599	18	26	15	58	Candidatus_Methanoregula_boonei_6A8	640753014
NODE_21_length_679_cov_305.478638	763	2537599	18	26	0	0	Candidatus_Methanoregula_boonei_6A8	640753014
NODE_27_length_564_cov_306.072693	648	2537599	18	26	0	0	Candidatus_Methanoregula_boonei_6A8	640753014
NODE_28_length_1135_cov_616.726013	1219	2537599	18	26	0	0	Candidatus_Methanoregula_boonei_6A8	640753014
NODE_3_length_199436_cov_305.991150	199520	2537599	18	26	15	58	Candidatus_Methanoregula_boonei_6A8	640753014
NODE_4_length_311670_cov_305.860748	311754	2537599	18	26	15	58	Candidatus_Methanoregula_boonei_6A8	640753014
NODE_5_length_539581_cov_306.026245	539665	2537599	18	26	15	58	Candidatus_Methanoregula_boonei_6A8	640753014
NODE_6_length_144637_cov_305.962067	144721	2537599	18	26	15	58	Candidatus_Methanoregula_boonei_6A8	640753014
NODE_7_length_53774_cov_306.254272	53858	2537599	18	26	15	58	Candidatus_Methanoregula_boonei_6A8	640753014
NODE_8_length_125898_cov_305.996735	125982	2537599	18	26	15	58	Candidatus_Methanoregula_boonei_6A8	640753014
NODE_9_length_149524_cov_305.415955	149608	2537599	18	26	15	58	Candidatus_Methanoregula_boonei_6A8	640753014
NODE_4240_length_825939_cov_66.045502	826023	5002813	39	5	30	27	Anaeromyxobacter_dehalogenans_2CP_C	637000007
NODE_4241_length_553887_cov_66.032707	553971	5002813	39	5	30	27	Anaeromyxobacter_dehalogenans_2CP_C	637000007
NODE_4242_length_195608_cov_66.017365	195692	5002813	39	5	30	27	Anaeromyxobacter_dehalogenans_2CP_C	637000007
NODE_4243_length_111939_cov_65.781021	112023	5002813	39	5	30	27	Anaeromyxobacter_dehalogenans_2CP_C	637000007
NODE_4244_length_202368_cov_65.863213	202452	5002813	39	5	30	27	Anaeromyxobacter_dehalogenans_2CP_C	637000007
NODE_4245_length_311017_cov_65.868202	311101	5002813	39	5	30	27	Anaeromyxobacter_dehalogenans_2CP_C	637000007
NODE_4246_length_260230_cov_66.153137	260314	5002813	39	5	30	27	Anaeromyxobacter_dehalogenans_2CP_C	637000007
NODE_4247_length_330654_cov_65.903061	330738	5002813	39	5	30	27	Anaeromyxobacter_dehalogenans_2CP_C	637000007
NODE_4248_length_248808_cov_65.972267	248892	5002813	39	5	30	27	Anaeromyxobacter_dehalogenans_2CP_C	637000007
NODE_4249_length_110257_cov_66.058899	110341	5002813	39	5	30	27	Anaeromyxobacter_dehalogenans_2CP_C	637000007
NODE_4250_length_258588_cov_66.031250	258672	5002813	39	5	30	27	Anaeromyxobacter_dehalogenans_2CP_C	637000007
NODE_4251_length_80995_cov_65.940857	81079	5002813	39	5	30	27	Anaeromyxobacter_dehalogenans_2CP_C	637000007
NODE_4252_length_301414_cov_66.210312	301498	5002813	39	5	30	27	Anaeromyxobacter_dehalogenans_2CP_C	637000007
NODE_4253_length_44362_cov_65.463440	44446	5002813	39	5	30	27	Anaeromyxobacter_dehalogenans_2CP_C	637000007
NODE_4254_length_42666_cov_65.776260	42750	5002813	39	5	30	27	Anaeromyxobacter_dehalogenans_2CP_C	637000007
NODE_4255_length_396157_cov_66.086754	396241	5002813	39	5	30	27	Anaeromyxobacter_dehalogenans_2CP_C	637000007
NODE_4256_length_41538_cov_65.726875	41622	5002813	39	5	30	27	Anaeromyxobacter_dehalogenans_2CP_C	637000007
NODE_4257_length_180515_cov_65.871185	180599	5002813	39	5	30	27	Anaeromyxobacter_dehalogenans_2CP_C	637000007
NODE_4258_length_22629_cov_65.723320	22713	5002813	39	5	30	27	Anaeromyxobacter_dehalogenans_2CP_C	637000007
NODE_4259_length_50802_cov_65.502617	50886	5002813	39	5	30	27	Anaeromyxobacter_dehalogenans_2CP_C	637000007
NODE_4260_length_48667_cov_66.193848	48751	5002813	39	5	30	27	Anaeromyxobacter_dehalogenans_2CP_C	637000007
NODE_4261_length_183616_cov_65.863480	183700	5002813	39	5	30	27	Anaeromyxobacter_dehalogenans_2CP_C	637000007
NODE_4262_length_96035_cov_66.077377	96119	5002813	39	5	30	27	Anaeromyxobacter_dehalogenans_2CP_C	637000007
NODE_4264_length_11422_cov_66.477852	11506	5002813	39	5	30	27	Anaeromyxobacter_dehalogenans_2CP_C	637000007
NODE_4266_length_32018_cov_66.527077	32102	5002813	39	5	30	27	Anaeromyxobacter_dehalogenans_2CP_C	637000007
NODE_4267_length_9954_cov_65.793045	10038	5002813	39	5	30	27	Anaeromyxobacter_dehalogenans_2CP_C	637000007
NODE_4268_length_6601_cov_66.127708	6685	5002813	39	5	30	27	Anaeromyxobacter_dehalogenans_2CP_C	637000007
NODE_4269_length_2732_cov_132.933014	2816	5002813	39	5	0	0	Anaeromyxobacter_dehalogenans_2CP_C	637000007
NODE_4270_length_31854_cov_66.102654	31938	5002813	39	5	30	27	Anaeromyxobacter_dehalogenans_2CP_C	637000007
NODE_4272_length_646_cov_133.721359	730	5002813	39	5	0	0	Anaeromyxobacter_dehalogenans_2CP_C	637000007
NODE_4275_length_604_cov_65.710266	688	5002813	39	5	0	0	Anaeromyxobacter_dehalogenans_2CP_C	637000007
NODE_4276_length_1538_cov_130.498703	1622	5002813	39	5	0	0	Anaeromyxobacter_dehalogenans_2CP_C	637000007
NODE_4277_length_3074_cov_66.871826	3158	5002813	39	5	0	27	Anaeromyxobacter_dehalogenans_2CP_C	637000007
NODE_4278_length_649_cov_136.280426	733	5002813	39	5	0	0	Anaeromyxobacter_dehalogenans_2CP_C	637000007
NODE_4279_length_517_cov_67.613152	601	5002813	39	5	0	0	Anaeromyxobacter_dehalogenans_2CP_C	637000007
NODE_4280_length_474_cov_65.487343	558	5002813	39	5	0	0	Anaeromyxobacter_dehalogenans_2CP_C	637000007
NODE_4283_length_474_cov_65.620255	558	5002813	39	5	0	0	Anaeromyxobacter_dehalogenans_2CP_C	637000007
NODE_4284_length_477_cov_133.379456	561	5002813	39	5	0	0	Anaeromyxobacter_dehalogenans_2CP_C	637000007
NODE_4299_length_1088_cov_132.015625	1172	5002813	39	5	0	0	Anaeromyxobacter_dehalogenans_2CP_C	637000007
NODE_10960_length_150124_cov_35.848385	150208	5282477	137	4	45	10	Colwellia_psychrerythraea_34H	637000081
NODE_10961_length_66115_cov_36.283127	66199	5282477	137	4	45	10	Colwellia_psychrerythraea_34H	637000081
NODE_10962_length_184810_cov_36.110001	184894	5282477	137	4	45	10	Colwellia_psychrerythraea_34H	637000081
NODE_10963_length_72227_cov_35.957813	72311	5282477	137	4	45	10	Colwellia_psychrerythraea_34H	637000081
NODE_10964_length_41653_cov_36.351234	41737	5282477	137	4	45	10	Colwellia_psychrerythraea_34H	637000081
NODE_10965_length_172765_cov_36.104633	172849	5282477	137	4	45	10	Colwellia_psychrerythraea_34H	637000081
NODE_10966_length_91531_cov_36.054867	91615	5282477	137	4	45	10	Colwellia_psychrerythraea_34H	637000081
NODE_10967_length_85703_cov_36.048107	85787	5282477	137	4	45	10	Colwellia_psychrerythraea_34H	637000081
NODE_10968_length_13554_cov_35.757046	13638	5282477	137	4	45	10	Colwellia_psychrerythraea_34H	637000081
NODE_10969_length_12972_cov_35.732731	13056	5282477	137	4	45	10	Colwellia_psychrerythraea_34H	637000081
NODE_10970_length_28782_cov_36.047497	28866	5282477	137	4	45	10	Colwellia_psychrerythraea_34H	637000081
NODE_10971_length_94034_cov_36.075207	94118	5282477	137	4	45	10	Colwellia_psychrerythraea_34H	637000081
NODE_10972_length_18311_cov_35.580688	18395	5282477	137	4	45	10	Colwellia_psychrerythraea_34H	637000081
NODE_10973_length_245853_cov_36.059952	245937	5282477	137	4	45	10	Colwellia_psychrerythraea_34H	637000081
NODE_10974_length_39459_cov_36.124786	39543	5282477	137	4	45	10	Colwellia_psychrerythraea_34H	637000081
NODE_10975_length_74129_cov_36.259171	74213	5282477	137	4	45	10	Colwellia_psychrerythraea_34H	637000081
NODE_10976_length_21190_cov_36.237377	21274	5282477	137	4	45	10	Colwellia_psychrerythraea_34H	637000081
NODE_10977_length_27665_cov_36.004482	27749	5282477	137	4	45	10	Colwellia_psychrerythraea_34H	637000081
NODE_10978_length_38259_cov_36.076637	38343	5282477	137	4	45	10	Colwellia_psychrerythraea_34H	637000081
NODE_10979_length_22257_cov_35.833130	22341	5282477	137	4	45	10	Colwellia_psychrerythraea_34H	637000081
NODE_10982_length_53338_cov_36.073906	53422	5282477	137	4	45	10	Colwellia_psychrerythraea_34H	637000081
NODE_10983_length_42372_cov_35.997143	42456	5282477	137	4	45	10	Colwellia_psychrerythraea_34H	637000081
NODE_10984_length_41687_cov_36.186413	41771	5282477	137	4	0	10	Colwellia_psychrerythraea_34H	637000081
NODE_10985_length_139536_cov_35.903316	139620	5282477	137	4	45	10	Colwellia_psychrerythraea_34H	637000081
NODE_10986_length_29017_cov_36.086121	29101	5282477	137	4	45	10	Colwellia_psychrerythraea_34H	637000081
NODE_10987_length_174662_cov_36.137230	174746	5282477	137	4	45	10	Colwellia_psychrerythraea_34H	637000081
NODE_10988_length_120829_cov_36.078476	120913	5282477	137	4	45	10	Colwellia_psychrerythraea_34H	637000081
NODE_10989_length_20117_cov_36.035343	20201	5282477	137	4	45	10	Colwellia_psychrerythraea_34H	637000081
NODE_10990_length_72322_cov_36.094357	72406	5282477	137	4	45	10	Colwellia_psychrerythraea_34H	637000081
NODE_10991_length_12623_cov_35.776043	12707	5282477	137	4	45	10	Colwellia_psychrerythraea_34H	637000081
NODE_10992_length_33722_cov_35.872963	33806	5282477	137	4	45	10	Colwellia_psychrerythraea_34H	637000081
NODE_10993_length_180368_cov_36.020016	180452	5282477	137	4	45	10	Colwellia_psychrerythraea_34H	637000081
NODE_10995_length_83275_cov_35.954670	83359	5282477	137	4	45	10	Colwellia_psychrerythraea_34H	637000081
NODE_10996_length_190031_cov_35.902760	190115	5282477	137	4	45	10	Colwellia_psychrerythraea_34H	637000081
NODE_10997_length_73009_cov_36.149487	73093	5282477	137	4	45	10	Colwellia_psychrerythraea_34H	637000081
NODE_10998_length_725_cov_181.520004	809	5282477	137	4	0	0	Colwellia_psychrerythraea_34H	637000081
NODE_10999_length_54550_cov_36.073677	54634	5282477	137	4	45	10	Colwellia_psychrerythraea_34H	637000081
NODE_11000_length_55520_cov_36.072495	55604	5282477	137	4	45	10	Colwellia_psychrerythraea_34H	637000081
NODE_11001_length_80700_cov_35.758488	80784	5282477	137	4	45	10	Colwellia_psychrerythraea_34H	637000081
NODE_11002_length_64945_cov_36.277328	65029	5282477	137	4	45	10	Colwellia_psychrerythraea_34H	637000081
NODE_11003_length_64441_cov_35.942383	64525	5282477	137	4	45	10	Colwellia_psychrerythraea_34H	637000081
NODE_11004_length_50341_cov_35.905464	50425	5282477	137	4	45	10	Colwellia_psychrerythraea_34H	637000081
NODE_11005_length_186625_cov_35.897228	186709	5282477	137	4	45	10	Colwellia_psychrerythraea_34H	637000081
NODE_11006_length_47650_cov_36.078613	47734	5282477	137	4	45	10	Colwellia_psychrerythraea_34H	637000081
NODE_11007_length_51077_cov_36.045071	51161	5282477	137	4	45	10	Colwellia_psychrerythraea_34H	637000081
NODE_11008_length_33450_cov_36.133900	33534	5282477	137	4	45	10	Colwellia_psychrerythraea_34H	637000081
NODE_11009_length_33169_cov_36.167416	33253	5282477	137	4	45	10	Colwellia_psychrerythraea_34H	637000081
NODE_11010_length_91748_cov_36.096264	91832	5282477	137	4	45	10	Colwellia_psychrerythraea_34H	637000081
NODE_11011_length_51266_cov_35.983673	51350	5282477	137	4	45	10	Colwellia_psychrerythraea_34H	637000081
NODE_11012_length_85747_cov_36.016632	85831	5282477	137	4	45	10	Colwellia_psychrerythraea_34H	637000081
NODE_11013_length_8662_cov_35.561302	8746	5282477	137	4	45	10	Colwellia_psychrerythraea_34H	637000081
NODE_11014_length_610_cov_74.198364	694	5282477	137	4	0	0	Colwellia_psychrerythraea_34H	637000081
NODE_11015_length_5387_cov_36.344349	5471	5282477	137	4	45	10	Colwellia_psychrerythraea_34H	637000081
NODE_11016_length_119282_cov_35.948753	119366	5282477	137	4	45	10	Colwellia_psychrerythraea_34H	637000081
NODE_11017_length_17422_cov_35.577030	17506	5282477	137	4	45	10	Colwellia_psychrerythraea_34H	637000081
NODE_11018_length_27493_cov_36.578583	27577	5282477	137	4	45	10	Colwellia_psychrerythraea_34H	637000081
NODE_11019_length_1008_cov_38.221230	1092	5282477	137	4	0	0	Colwellia_psychrerythraea_34H	637000081
NODE_11020_length_1388_cov_35.816284	1472	5282477	137	4	0	0	Colwellia_psychrerythraea_34H	637000081
NODE_11021_length_56870_cov_35.944363	56954	5282477	137	4	45	10	Colwellia_psychrerythraea_34H	637000081
NODE_11022_length_22848_cov_35.789917	22932	5282477	137	4	45	10	Colwellia_psychrerythraea_34H	637000081
NODE_11023_length_29154_cov_36.140324	29238	5282477	137	4	45	10	Colwellia_psychrerythraea_34H	637000081
NODE_11025_length_30855_cov_36.242035	30939	5282477	137	4	45	10	Colwellia_psychrerythraea_34H	637000081
NODE_11026_length_55208_cov_36.018639	55292	5282477	137	4	45	10	Colwellia_psychrerythraea_34H	637000081
NODE_11027_length_42730_cov_36.134029	42814	5282477	137	4	45	10	Colwellia_psychrerythraea_34H	637000081
NODE_11028_length_22797_cov_36.478264	22881	5282477	137	4	45	10	Colwellia_psychrerythraea_34H	637000081
NODE_11029_length_37672_cov_35.931011	37756	5282477	137	4	45	10	Colwellia_psychrerythraea_34H	637000081
NODE_11030_length_64668_cov_35.990383	64752	5282477	137	4	45	10	Colwellia_psychrerythraea_34H	637000081
NODE_11031_length_60511_cov_35.993935	60595	5282477	137	4	45	10	Colwellia_psychrerythraea_34H	637000081
NODE_11032_length_35245_cov_35.849087	35329	5282477	137	4	45	10	Colwellia_psychrerythraea_34H	637000081
NODE_11033_length_31009_cov_35.929310	31093	5282477	137	4	45	10	Colwellia_psychrerythraea_34H	637000081
NODE_11034_length_30220_cov_36.152649	30304	5282477	137	4	45	10	Colwellia_psychrerythraea_34H	637000081
NODE_11035_length_34374_cov_35.748676	34458	5282477	137	4	45	10	Colwellia_psychrerythraea_34H	637000081
NODE_11036_length_13262_cov_36.209774	13346	5282477	137	4	45	10	Colwellia_psychrerythraea_34H	637000081
NODE_11037_length_12690_cov_36.252720	12774	5282477	137	4	45	10	Colwellia_psychrerythraea_34H	637000081
NODE_11038_length_47259_cov_35.875072	47343	5282477	137	4	45	10	Colwellia_psychrerythraea_34H	637000081
NODE_11041_length_74731_cov_36.175911	74815	5282477	137	4	45	10	Colwellia_psychrerythraea_34H	637000081
NODE_11042_length_14010_cov_36.173805	14094	5282477	137	4	45	10	Colwellia_psychrerythraea_34H	637000081
NODE_11043_length_21852_cov_36.243046	21936	5282477	137	4	45	10	Colwellia_psychrerythraea_34H	637000081
NODE_11044_length_136311_cov_36.117424	136395	5282477	137	4	45	10	Colwellia_psychrerythraea_34H	637000081
NODE_11045_length_21472_cov_36.097847	21556	5282477	137	4	45	10	Colwellia_psychrerythraea_34H	637000081
NODE_11046_length_27557_cov_36.267082	27641	5282477	137	4	45	10	Colwellia_psychrerythraea_34H	637000081
NODE_11047_length_72230_cov_36.113041	72314	5282477	137	4	45	10	Colwellia_psychrerythraea_34H	637000081
NODE_11048_length_671_cov_69.073029	755	5282477	137	4	0	10	Colwellia_psychrerythraea_34H	637000081
NODE_11049_length_21780_cov_35.855186	21864	5282477	137	4	45	10	Colwellia_psychrerythraea_34H	637000081
NODE_11050_length_19633_cov_36.073242	19717	5282477	137	4	45	10	Colwellia_psychrerythraea_34H	637000081
NODE_11051_length_19387_cov_36.093876	19471	5282477	137	4	45	10	Colwellia_psychrerythraea_34H	637000081
NODE_11052_length_2876_cov_35.474617	2960	5282477	137	4	45	10	Colwellia_psychrerythraea_34H	637000081
NODE_11053_length_14912_cov_36.150749	14996	5282477	137	4	45	10	Colwellia_psychrerythraea_34H	637000081
NODE_11054_length_9404_cov_36.399403	9488	5282477	137	4	0	10	Colwellia_psychrerythraea_34H	637000081
NODE_11055_length_4900_cov_35.834896	4984	5282477	137	4	45	10	Colwellia_psychrerythraea_34H	637000081
NODE_11056_length_10748_cov_36.283401	10832	5282477	137	4	45	10	Colwellia_psychrerythraea_34H	637000081
NODE_11057_length_42612_cov_36.070240	42696	5282477	137	4	45	10	Colwellia_psychrerythraea_34H	637000081
NODE_11058_length_2562_cov_35.518734	2646	5282477	137	4	45	10	Colwellia_psychrerythraea_34H	637000081
NODE_11059_length_33729_cov_36.092651	33813	5282477	137	4	45	10	Colwellia_psychrerythraea_34H	637000081
NODE_11061_length_4963_cov_71.458389	5047	5282477	137	4	45	10	Colwellia_psychrerythraea_34H	637000081
NODE_11062_length_3286_cov_35.981133	3370	5282477	137	4	45	10	Colwellia_psychrerythraea_34H	637000081
NODE_11063_length_1467_cov_33.985004	1551	5282477	137	4	0	0	Colwellia_psychrerythraea_34H	637000081
NODE_11064_length_29580_cov_36.066158	29664	5282477	137	4	45	10	Colwellia_psychrerythraea_34H	637000081
NODE_11065_length_9195_cov_35.920067	9279	5282477	137	4	0	10	Colwellia_psychrerythraea_34H	637000081
NODE_11066_length_19231_cov_35.534241	19315	5282477	137	4	45	10	Colwellia_psychrerythraea_34H	637000081
NODE_11067_length_785_cov_70.816559	869	5282477	137	4	0	10	Colwellia_psychrerythraea_34H	637000081
NODE_11068_length_12980_cov_36.030430	13064	5282477	137	4	45	10	Colwellia_psychrerythraea_34H	637000081
NODE_11070_length_42618_cov_36.003098	42702	5282477	137	4	45	10	Colwellia_psychrerythraea_34H	637000081
NODE_11072_length_3434_cov_36.526207	3518	5282477	137	4	45	10	Colwellia_psychrerythraea_34H	637000081
NODE_11073_length_1817_cov_36.192627	1901	5282477	137	4	0	10	Colwellia_psychrerythraea_34H	637000081
NODE_11074_length_6616_cov_35.453445	6700	5282477	137	4	45	10	Colwellia_psychrerythraea_34H	637000081
NODE_11077_length_657_cov_36.922375	741	5282477	137	4	0	10	Colwellia_psychrerythraea_34H	637000081
NODE_11079_length_4640_cov_36.354095	4724	5282477	137	4	45	10	Colwellia_psychrerythraea_34H	637000081
NODE_11080_length_2349_cov_35.854832	2433	5282477	137	4	45	10	Colwellia_psychrerythraea_34H	637000081
NODE_11082_length_518_cov_324.156372	602	5282477	137	4	0	0	Colwellia_psychrerythraea_34H	637000081
NODE_11083_length_7577_cov_35.456646	7661	5282477	137	4	45	10	Colwellia_psychrerythraea_34H	637000081
NODE_11084_length_470_cov_141.268082	554	5282477	137	4	0	0	Colwellia_psychrerythraea_34H	637000081
NODE_11085_length_5310_cov_35.610546	5394	5282477	137	4	45	10	Colwellia_psychrerythraea_34H	637000081
NODE_11086_length_1722_cov_35.178280	1806	5282477	137	4	0	10	Colwellia_psychrerythraea_34H	637000081
NODE_11087_length_7250_cov_35.658760	7334	5282477	137	4	45	10	Colwellia_psychrerythraea_34H	637000081
NODE_11092_length_5191_cov_36.140820	5275	5282477	137	4	45	10	Colwellia_psychrerythraea_34H	637000081
NODE_11093_length_2736_cov_36.313232	2820	5282477	137	4	45	10	Colwellia_psychrerythraea_34H	637000081
NODE_11099_length_1413_cov_109.477707	1497	5282477	137	4	0	10	Colwellia_psychrerythraea_34H	637000081
NODE_11100_length_2605_cov_36.224567	2689	5282477	137	4	45	10	Colwellia_psychrerythraea_34H	637000081
NODE_11103_length_476_cov_72.873947	560	5282477	137	4	0	0	Colwellia_psychrerythraea_34H	637000081
NODE_11105_length_1429_cov_35.524841	1513	5282477	137	4	0	10	Colwellia_psychrerythraea_34H	637000081
NODE_11111_length_3856_cov_36.185165	3940	5282477	137	4	45	10	Colwellia_psychrerythraea_34H	637000081
NODE_11115_length_1617_cov_71.118118	1701	5282477	137	4	0	10	Colwellia_psychrerythraea_34H	637000081
NODE_11116_length_665_cov_72.054138	749	5282477	137	4	0	10	Colwellia_psychrerythraea_34H	637000081
NODE_11123_length_4714_cov_36.022911	4798	5282477	137	4	45	10	Colwellia_psychrerythraea_34H	637000081
NODE_11130_length_633_cov_71.191154	717	5282477	137	4	0	10	Colwellia_psychrerythraea_34H	637000081
NODE_11141_length_943_cov_35.050900	1027	5282477	137	4	0	10	Colwellia_psychrerythraea_34H	637000081
NODE_11144_length_668_cov_70.525452	752	5282477	137	4	0	0	Colwellia_psychrerythraea_34H	637000081
NODE_11175_length_1560_cov_72.117310	1644	5282477	137	4	0	10	Colwellia_psychrerythraea_34H	637000081
NODE_11179_length_622_cov_73.958199	706	5282477	137	4	0	0	Colwellia_psychrerythraea_34H	637000081
NODE_11187_length_1435_cov_320.355408	1519	5282477	137	4	0	0	Colwellia_psychrerythraea_34H	637000081
NODE_11189_length_2334_cov_34.846188	2418	5282477	137	4	45	10	Colwellia_psychrerythraea_34H	637000081
NODE_11201_length_570_cov_71.961403	654	5282477	137	4	0	0	Colwellia_psychrerythraea_34H	637000081
NODE_11217_length_420_cov_33.495239	504	5282477	137	4	0	0	Colwellia_psychrerythraea_34H	637000081
NODE_11218_length_432_cov_36.203705	516	5282477	137	4	0	10	Colwellia_psychrerythraea_34H	637000081
NODE_11231_length_943_cov_36.460232	1027	5282477	137	4	0	10	Colwellia_psychrerythraea_34H	637000081
NODE_11263_length_494_cov_34.831985	578	5282477	137	4	0	0	Colwellia_psychrerythraea_34H	637000081
NODE_14596_length_50104_cov_61.087898	50188	3669679	288	15	16	0	Leptospira_borgpetersenii_serovar_Hardjo_bovis_L550_chromosome_2	639633033
NODE_14597_length_7778_cov_61.642452	7862	3669679	288	15	16	0	Leptospira_borgpetersenii_serovar_Hardjo_bovis_L550_chromosome_2	639633033
NODE_14599_length_6803_cov_62.201824	6887	3669679	288	15	16	1	Leptospira_borgpetersenii_serovar_Hardjo_bovis_L550_chromosome_2	639633033
NODE_14600_length_31504_cov_61.159153	31588	3669679	288	15	16	1	Leptospira_borgpetersenii_serovar_Hardjo_bovis_L550_chromosome_2	639633033
NODE_14601_length_34322_cov_61.322708	34406	3669679	288	15	16	1	Leptospira_borgpetersenii_serovar_Hardjo_bovis_L550_chromosome_2	639633033
NODE_14602_length_44187_cov_61.880440	44271	3669679	288	15	16	1	Leptospira_borgpetersenii_serovar_Hardjo_bovis_L550_chromosome_2	639633033
NODE_14603_length_17227_cov_61.856041	17311	3669679	288	15	16	1	Leptospira_borgpetersenii_serovar_Hardjo_bovis_L550_chromosome_2	639633033
NODE_14604_length_60085_cov_61.323708	60169	3669679	288	15	16	1	Leptospira_borgpetersenii_serovar_Hardjo_bovis_L550_chromosome_2	639633033
NODE_14605_length_1158_cov_61.433506	1242	3669679	288	15	0	1	Leptospira_borgpetersenii_serovar_Hardjo_bovis_L550_chromosome_2	639633033
NODE_14606_length_17403_cov_61.563812	17487	3669679	288	15	16	1	Leptospira_borgpetersenii_serovar_Hardjo_bovis_L550_chromosome_2	639633033
NODE_14607_length_3393_cov_63.079872	3477	3669679	288	15	16	1	Leptospira_borgpetersenii_serovar_Hardjo_bovis_L550_chromosome_2	639633033
NODE_14608_length_3731_cov_60.920933	3815	3669679	288	15	16	1	Leptospira_borgpetersenii_serovar_Hardjo_bovis_L550_chromosome_2	639633033
NODE_14609_length_3659_cov_61.349277	3743	3669679	288	15	16	1	Leptospira_borgpetersenii_serovar_Hardjo_bovis_L550_chromosome_2	639633033
NODE_14615_length_6050_cov_61.140991	6134	3669679	288	15	16	1	Leptospira_borgpetersenii_serovar_Hardjo_bovis_L550_chromosome_2	639633033
NODE_14616_length_899_cov_60.770855	983	3669679	288	15	0	1	Leptospira_borgpetersenii_serovar_Hardjo_bovis_L550_chromosome_2	639633033
NODE_14617_length_8727_cov_61.861465	8811	3669679	288	15	16	1	Leptospira_borgpetersenii_serovar_Hardjo_bovis_L550_chromosome_2	639633033
NODE_14626_length_1015_cov_62.434483	1099	3669679	288	15	0	1	Leptospira_borgpetersenii_serovar_Hardjo_bovis_L550_chromosome_2	639633033
NODE_14638_length_1115_cov_61.086994	1199	3669679	288	15	0	1	Leptospira_borgpetersenii_serovar_Hardjo_bovis_L550_chromosome_2	639633033
NODE_14646_length_1037_cov_552.433960	1121	3669679	288	15	0	0	Leptospira_borgpetersenii_serovar_Hardjo_bovis_L550_chromosome_1	639633033
NODE_8536_length_14694_cov_61.737240	14778	3669679	288	15	16	1	Leptospira_borgpetersenii_serovar_Hardjo_bovis_L550_chromosome_1	639633033
NODE_8537_length_6943_cov_61.433243	7027	3669679	288	15	16	1	Leptospira_borgpetersenii_serovar_Hardjo_bovis_L550_chromosome_1	639633033
NODE_8538_length_3191_cov_60.473518	3275	3669679	288	15	16	1	Leptospira_borgpetersenii_serovar_Hardjo_bovis_L550_chromosome_1	639633033
NODE_8539_length_59262_cov_61.533325	59346	3669679	288	15	16	1	Leptospira_borgpetersenii_serovar_Hardjo_bovis_L550_chromosome_1	639633033
NODE_8540_length_47525_cov_61.671288	47609	3669679	288	15	16	1	Leptospira_borgpetersenii_serovar_Hardjo_bovis_L550_chromosome_1	639633033
NODE_8541_length_9586_cov_61.276653	9670	3669679	288	15	16	1	Leptospira_borgpetersenii_serovar_Hardjo_bovis_L550_chromosome_1	639633033
NODE_8550_length_2718_cov_60.873436	2802	3669679	288	15	16	1	Leptospira_borgpetersenii_serovar_Hardjo_bovis_L550_chromosome_1	639633033
NODE_8551_length_5253_cov_60.489624	5337	3669679	288	15	16	1	Leptospira_borgpetersenii_serovar_Hardjo_bovis_L550_chromosome_1	639633033
NODE_8552_length_13347_cov_61.653854	13431	3669679	288	15	16	1	Leptospira_borgpetersenii_serovar_Hardjo_bovis_L550_chromosome_1	639633033
NODE_8553_length_21234_cov_61.157719	21318	3669679	288	15	16	1	Leptospira_borgpetersenii_serovar_Hardjo_bovis_L550_chromosome_1	639633033
NODE_8554_length_61169_cov_61.505745	61253	3669679	288	15	16	1	Leptospira_borgpetersenii_serovar_Hardjo_bovis_L550_chromosome_1	639633033
NODE_8555_length_16482_cov_61.390549	16566	3669679	288	15	16	1	Leptospira_borgpetersenii_serovar_Hardjo_bovis_L550_chromosome_1	639633033
NODE_8556_length_70854_cov_61.532547	70938	3669679	288	15	16	1	Leptospira_borgpetersenii_serovar_Hardjo_bovis_L550_chromosome_1	639633033
NODE_8557_length_27794_cov_61.242893	27878	3669679	288	15	16	1	Leptospira_borgpetersenii_serovar_Hardjo_bovis_L550_chromosome_1	639633033
NODE_8558_length_75693_cov_61.352768	75777	3669679	288	15	16	1	Leptospira_borgpetersenii_serovar_Hardjo_bovis_L550_chromosome_1	639633033
NODE_8559_length_47786_cov_61.513813	47870	3669679	288	15	16	1	Leptospira_borgpetersenii_serovar_Hardjo_bovis_L550_chromosome_1	639633033
NODE_8560_length_25085_cov_60.949093	25169	3669679	288	15	16	1	Leptospira_borgpetersenii_serovar_Hardjo_bovis_L550_chromosome_1	639633033
NODE_8562_length_20765_cov_61.386421	20849	3669679	288	15	16	1	Leptospira_borgpetersenii_serovar_Hardjo_bovis_L550_chromosome_1	639633033
NODE_8563_length_64444_cov_61.303673	64528	3669679	288	15	16	1	Leptospira_borgpetersenii_serovar_Hardjo_bovis_L550_chromosome_1	639633033
NODE_8564_length_18059_cov_61.675785	18143	3669679	288	15	0	1	Leptospira_borgpetersenii_serovar_Hardjo_bovis_L550_chromosome_1	639633033
NODE_8565_length_50923_cov_61.484772	51007	3669679	288	15	16	1	Leptospira_borgpetersenii_serovar_Hardjo_bovis_L550_chromosome_1	639633033
NODE_8566_length_3851_cov_61.938976	3935	3669679	288	15	16	1	Leptospira_borgpetersenii_serovar_Hardjo_bovis_L550_chromosome_1	639633033
NODE_8567_length_64775_cov_61.535591	64859	3669679	288	15	16	1	Leptospira_borgpetersenii_serovar_Hardjo_bovis_L550_chromosome_1	639633033
NODE_8568_length_20297_cov_61.658867	20381	3669679	288	15	16	1	Leptospira_borgpetersenii_serovar_Hardjo_bovis_L550_chromosome_1	639633033
NODE_8569_length_2250_cov_63.615112	2334	3669679	288	15	16	1	Leptospira_borgpetersenii_serovar_Hardjo_bovis_L550_chromosome_1	639633033
NODE_8571_length_18695_cov_60.759293	18779	3669679	288	15	16	1	Leptospira_borgpetersenii_serovar_Hardjo_bovis_L550_chromosome_1	639633033
NODE_8572_length_15275_cov_61.609428	15359	3669679	288	15	16	1	Leptospira_borgpetersenii_serovar_Hardjo_bovis_L550_chromosome_1	639633033
NODE_8573_length_3292_cov_60.916767	3376	3669679	288	15	16	1	Leptospira_borgpetersenii_serovar_Hardjo_bovis_L550_chromosome_1	639633033
NODE_8574_length_3535_cov_60.594624	3619	3669679	288	15	16	1	Leptospira_borgpetersenii_serovar_Hardjo_bovis_L550_chromosome_1	639633033
NODE_8575_length_22828_cov_61.374279	22912	3669679	288	15	16	1	Leptospira_borgpetersenii_serovar_Hardjo_bovis_L550_chromosome_1	639633033
NODE_8576_length_3998_cov_60.796146	4082	3669679	288	15	16	1	Leptospira_borgpetersenii_serovar_Hardjo_bovis_L550_chromosome_1	639633033
NODE_8577_length_42917_cov_61.627747	43001	3669679	288	15	16	1	Leptospira_borgpetersenii_serovar_Hardjo_bovis_L550_chromosome_1	639633033
NODE_8578_length_19987_cov_61.814980	20071	3669679	288	15	16	1	Leptospira_borgpetersenii_serovar_Hardjo_bovis_L550_chromosome_1	639633033
NODE_8579_length_22477_cov_61.315613	22561	3669679	288	15	16	1	Leptospira_borgpetersenii_serovar_Hardjo_bovis_L550_chromosome_1	639633033
NODE_8580_length_23017_cov_61.999695	23101	3669679	288	15	16	1	Leptospira_borgpetersenii_serovar_Hardjo_bovis_L550_chromosome_1	639633033
NODE_8581_length_22444_cov_61.478256	22528	3669679	288	15	16	1	Leptospira_borgpetersenii_serovar_Hardjo_bovis_L550_chromosome_1	639633033
NODE_8582_length_14333_cov_61.889275	14417	3669679	288	15	16	1	Leptospira_borgpetersenii_serovar_Hardjo_bovis_L550_chromosome_1	639633033
NODE_8583_length_26057_cov_61.797367	26141	3669679	288	15	16	1	Leptospira_borgpetersenii_serovar_Hardjo_bovis_L550_chromosome_1	639633033
NODE_8584_length_27859_cov_61.622673	27943	3669679	288	15	16	1	Leptospira_borgpetersenii_serovar_Hardjo_bovis_L550_chromosome_1	639633033
NODE_8585_length_34019_cov_60.986477	34103	3669679	288	15	16	1	Leptospira_borgpetersenii_serovar_Hardjo_bovis_L550_chromosome_1	639633033
NODE_8586_length_59525_cov_61.602589	59609	3669679	288	15	16	1	Leptospira_borgpetersenii_serovar_Hardjo_bovis_L550_chromosome_1	639633033
NODE_8588_length_41272_cov_61.617149	41356	3669679	288	15	16	1	Leptospira_borgpetersenii_serovar_Hardjo_bovis_L550_chromosome_1	639633033
NODE_8589_length_9307_cov_61.699043	9391	3669679	288	15	16	1	Leptospira_borgpetersenii_serovar_Hardjo_bovis_L550_chromosome_1	639633033
NODE_8590_length_6837_cov_61.128567	6921	3669679	288	15	16	1	Leptospira_borgpetersenii_serovar_Hardjo_bovis_L550_chromosome_1	639633033
NODE_8591_length_4683_cov_62.168907	4767	3669679	288	15	16	1	Leptospira_borgpetersenii_serovar_Hardjo_bovis_L550_chromosome_1	639633033
NODE_8592_length_6160_cov_61.587826	6244	3669679	288	15	16	1	Leptospira_borgpetersenii_serovar_Hardjo_bovis_L550_chromosome_1	639633033
NODE_8593_length_19520_cov_61.640675	19604	3669679	288	15	16	1	Leptospira_borgpetersenii_serovar_Hardjo_bovis_L550_chromosome_1	639633033
NODE_8594_length_3211_cov_60.929306	3295	3669679	288	15	16	1	Leptospira_borgpetersenii_serovar_Hardjo_bovis_L550_chromosome_1	639633033
NODE_8595_length_8953_cov_62.189209	9037	3669679	288	15	16	1	Leptospira_borgpetersenii_serovar_Hardjo_bovis_L550_chromosome_1	639633033
NODE_8596_length_31017_cov_61.259697	31101	3669679	288	15	16	1	Leptospira_borgpetersenii_serovar_Hardjo_bovis_L550_chromosome_1	639633033
NODE_8597_length_4116_cov_60.732994	4200	3669679	288	15	16	1	Leptospira_borgpetersenii_serovar_Hardjo_bovis_L550_chromosome_1	639633033
NODE_8600_length_10480_cov_61.807537	10564	3669679	288	15	16	1	Leptospira_borgpetersenii_serovar_Hardjo_bovis_L550_chromosome_1	639633033
NODE_8601_length_22850_cov_61.785820	22934	3669679	288	15	16	1	Leptospira_borgpetersenii_serovar_Hardjo_bovis_L550_chromosome_1	639633033
NODE_8602_length_42901_cov_61.307358	42985	3669679	288	15	16	1	Leptospira_borgpetersenii_serovar_Hardjo_bovis_L550_chromosome_1	639633033
NODE_8603_length_4433_cov_61.728176	4517	3669679	288	15	0	1	Leptospira_borgpetersenii_serovar_Hardjo_bovis_L550_chromosome_1	639633033
NODE_8604_length_20608_cov_61.438568	20692	3669679	288	15	16	1	Leptospira_borgpetersenii_serovar_Hardjo_bovis_L550_chromosome_1	639633033
NODE_8606_length_18930_cov_61.600529	19014	3669679	288	15	16	1	Leptospira_borgpetersenii_serovar_Hardjo_bovis_L550_chromosome_1	639633033
NODE_8607_length_11878_cov_61.257618	11962	3669679	288	15	16	1	Leptospira_borgpetersenii_serovar_Hardjo_bovis_L550_chromosome_1	639633033
NODE_8608_length_23137_cov_61.984657	23221	3669679	288	15	16	1	Leptospira_borgpetersenii_serovar_Hardjo_bovis_L550_chromosome_1	639633033
NODE_8609_length_6953_cov_61.403278	7037	3669679	288	15	16	1	Leptospira_borgpetersenii_serovar_Hardjo_bovis_L550_chromosome_1	639633033
NODE_8610_length_31734_cov_61.454876	31818	3669679	288	15	16	1	Leptospira_borgpetersenii_serovar_Hardjo_bovis_L550_chromosome_1	639633033
NODE_8611_length_431_cov_65.930397	515	3669679	288	15	0	1	Leptospira_borgpetersenii_serovar_Hardjo_bovis_L550_chromosome_1	639633033
NODE_8612_length_5083_cov_61.889240	5167	3669679	288	15	16	1	Leptospira_borgpetersenii_serovar_Hardjo_bovis_L550_chromosome_1	639633033
NODE_8613_length_8816_cov_61.727089	8900	3669679	288	15	16	1	Leptospira_borgpetersenii_serovar_Hardjo_bovis_L550_chromosome_1	639633033
NODE_8614_length_61337_cov_61.352314	61421	3669679	288	15	16	1	Leptospira_borgpetersenii_serovar_Hardjo_bovis_L550_chromosome_1	639633033
NODE_8615_length_35932_cov_61.574837	36016	3669679	288	15	16	1	Leptospira_borgpetersenii_serovar_Hardjo_bovis_L550_chromosome_1	639633033
NODE_8616_length_26768_cov_61.455544	26852	3669679	288	15	16	1	Leptospira_borgpetersenii_serovar_Hardjo_bovis_L550_chromosome_1	639633033
NODE_8617_length_6245_cov_60.758526	6329	3669679	288	15	16	1	Leptospira_borgpetersenii_serovar_Hardjo_bovis_L550_chromosome_1	639633033
NODE_8618_length_22335_cov_61.859997	22419	3669679	288	15	16	1	Leptospira_borgpetersenii_serovar_Hardjo_bovis_L550_chromosome_1	639633033
NODE_8619_length_32599_cov_61.326298	32683	3669679	288	15	16	1	Leptospira_borgpetersenii_serovar_Hardjo_bovis_L550_chromosome_1	639633033
NODE_8620_length_14170_cov_61.178333	14254	3669679	288	15	16	1	Leptospira_borgpetersenii_serovar_Hardjo_bovis_L550_chromosome_1	639633033
NODE_8621_length_11670_cov_61.335991	11754	3669679	288	15	16	1	Leptospira_borgpetersenii_serovar_Hardjo_bovis_L550_chromosome_1	639633033
NODE_8622_length_21402_cov_60.951546	21486	3669679	288	15	16	1	Leptospira_borgpetersenii_serovar_Hardjo_bovis_L550_chromosome_1	639633033
NODE_8623_length_8415_cov_62.014736	8499	3669679	288	15	16	1	Leptospira_borgpetersenii_serovar_Hardjo_bovis_L550_chromosome_1	639633033
NODE_8625_length_788_cov_60.158630	872	3669679	288	15	0	1	Leptospira_borgpetersenii_serovar_Hardjo_bovis_L550_chromosome_1	639633033
NODE_8626_length_3951_cov_60.628700	4035	3669679	288	15	16	1	Leptospira_borgpetersenii_serovar_Hardjo_bovis_L550_chromosome_1	639633033
NODE_8628_length_18179_cov_61.199738	18263	3669679	288	15	16	1	Leptospira_borgpetersenii_serovar_Hardjo_bovis_L550_chromosome_1	639633033
NODE_8629_length_17232_cov_61.384342	17316	3669679	288	15	16	1	Leptospira_borgpetersenii_serovar_Hardjo_bovis_L550_chromosome_1	639633033
NODE_8630_length_1516_cov_62.375328	1600	3669679	288	15	0	1	Leptospira_borgpetersenii_serovar_Hardjo_bovis_L550_chromosome_1	639633033
NODE_8631_length_14822_cov_61.274658	14906	3669679	288	15	16	1	Leptospira_borgpetersenii_serovar_Hardjo_bovis_L550_chromosome_1	639633033
NODE_8632_length_50544_cov_61.392292	50628	3669679	288	15	16	1	Leptospira_borgpetersenii_serovar_Hardjo_bovis_L550_chromosome_1	639633033
NODE_8633_length_26231_cov_61.123821	26315	3669679	288	15	16	1	Leptospira_borgpetersenii_serovar_Hardjo_bovis_L550_chromosome_1	639633033
NODE_8634_length_27258_cov_61.258419	27342	3669679	288	15	16	1	Leptospira_borgpetersenii_serovar_Hardjo_bovis_L550_chromosome_1	639633033
NODE_8635_length_12336_cov_61.639267	12420	3669679	288	15	16	1	Leptospira_borgpetersenii_serovar_Hardjo_bovis_L550_chromosome_1	639633033
NODE_8636_length_11166_cov_61.348377	11250	3669679	288	15	16	1	Leptospira_borgpetersenii_serovar_Hardjo_bovis_L550_chromosome_1	639633033
NODE_8638_length_2414_cov_61.499172	2498	3669679	288	15	16	1	Leptospira_borgpetersenii_serovar_Hardjo_bovis_L550_chromosome_1	639633033
NODE_8639_length_34755_cov_61.625523	34839	3669679	288	15	16	1	Leptospira_borgpetersenii_serovar_Hardjo_bovis_L550_chromosome_1	639633033
NODE_8640_length_18059_cov_60.590176	18143	3669679	288	15	16	1	Leptospira_borgpetersenii_serovar_Hardjo_bovis_L550_chromosome_1	639633033
NODE_8641_length_12027_cov_60.895817	12111	3669679	288	15	16	1	Leptospira_borgpetersenii_serovar_Hardjo_bovis_L550_chromosome_1	639633033
NODE_8642_length_12712_cov_61.266285	12796	3669679	288	15	16	1	Leptospira_borgpetersenii_serovar_Hardjo_bovis_L550_chromosome_1	639633033
NODE_8643_length_13460_cov_61.585957	13544	3669679	288	15	16	1	Leptospira_borgpetersenii_serovar_Hardjo_bovis_L550_chromosome_1	639633033
NODE_8644_length_4050_cov_61.369877	4134	3669679	288	15	16	1	Leptospira_borgpetersenii_serovar_Hardjo_bovis_L550_chromosome_1	639633033
NODE_8645_length_13868_cov_60.907269	13952	3669679	288	15	16	1	Leptospira_borgpetersenii_serovar_Hardjo_bovis_L550_chromosome_1	639633033
NODE_8647_length_16264_cov_61.463539	16348	3669679	288	15	16	1	Leptospira_borgpetersenii_serovar_Hardjo_bovis_L550_chromosome_1	639633033
NODE_8652_length_13934_cov_61.685589	14018	3669679	288	15	16	1	Leptospira_borgpetersenii_serovar_Hardjo_bovis_L550_chromosome_1	639633033
NODE_8653_length_11934_cov_61.683762	12018	3669679	288	15	0	1	Leptospira_borgpetersenii_serovar_Hardjo_bovis_L550_chromosome_1	639633033
NODE_8654_length_11227_cov_61.611652	11311	3669679	288	15	0	1	Leptospira_borgpetersenii_serovar_Hardjo_bovis_L550_chromosome_1	639633033
NODE_8655_length_26082_cov_61.560539	26166	3669679	288	15	16	1	Leptospira_borgpetersenii_serovar_Hardjo_bovis_L550_chromosome_1	639633033
NODE_8656_length_3622_cov_123.019882	3706	3669679	288	15	18	0	Leptospira_borgpetersenii_serovar_Hardjo_bovis_L550_chromosome_1	639633033
NODE_8657_length_19172_cov_61.265076	19256	3669679	288	15	16	1	Leptospira_borgpetersenii_serovar_Hardjo_bovis_L550_chromosome_1	639633033
NODE_8658_length_24663_cov_123.200790	24747	3669679	288	15	0	1	Leptospira_borgpetersenii_serovar_Hardjo_bovis_L550_chromosome_1	639633033
NODE_8660_length_3843_cov_61.570648	3927	3669679	288	15	0	1	Leptospira_borgpetersenii_serovar_Hardjo_bovis_L550_chromosome_1	639633033
NODE_8661_length_4470_cov_60.600449	4554	3669679	288	15	16	1	Leptospira_borgpetersenii_serovar_Hardjo_bovis_L550_chromosome_1	639633033
NODE_8662_length_17088_cov_61.080055	17172	3669679	288	15	16	1	Leptospira_borgpetersenii_serovar_Hardjo_bovis_L550_chromosome_1	639633033
NODE_8663_length_22976_cov_61.334522	23060	3669679	288	15	16	1	Leptospira_borgpetersenii_serovar_Hardjo_bovis_L550_chromosome_1	639633033
NODE_8664_length_32596_cov_61.013191	32680	3669679	288	15	16	1	Leptospira_borgpetersenii_serovar_Hardjo_bovis_L550_chromosome_1	639633033
NODE_8665_length_7440_cov_61.506584	7524	3669679	288	15	16	1	Leptospira_borgpetersenii_serovar_Hardjo_bovis_L550_chromosome_1	639633033
NODE_8666_length_59639_cov_61.262295	59723	3669679	288	15	16	1	Leptospira_borgpetersenii_serovar_Hardjo_bovis_L550_chromosome_1	639633033
NODE_8667_length_3304_cov_61.366829	3388	3669679	288	15	16	1	Leptospira_borgpetersenii_serovar_Hardjo_bovis_L550_chromosome_1	639633033
NODE_8669_length_11701_cov_61.740536	11785	3669679	288	15	0	1	Leptospira_borgpetersenii_serovar_Hardjo_bovis_L550_chromosome_1	639633033
NODE_8670_length_28179_cov_61.749210	28263	3669679	288	15	16	1	Leptospira_borgpetersenii_serovar_Hardjo_bovis_L550_chromosome_1	639633033
NODE_8671_length_13209_cov_61.673027	13293	3669679	288	15	16	1	Leptospira_borgpetersenii_serovar_Hardjo_bovis_L550_chromosome_1	639633033
NODE_8672_length_12871_cov_61.825344	12955	3669679	288	15	16	1	Leptospira_borgpetersenii_serovar_Hardjo_bovis_L550_chromosome_1	639633033
NODE_8676_length_11085_cov_60.758141	11169	3669679	288	15	16	1	Leptospira_borgpetersenii_serovar_Hardjo_bovis_L550_chromosome_1	639633033
NODE_8677_length_10085_cov_61.717899	10169	3669679	288	15	16	1	Leptospira_borgpetersenii_serovar_Hardjo_bovis_L550_chromosome_1	639633033
NODE_8678_length_5114_cov_62.285881	5198	3669679	288	15	16	1	Leptospira_borgpetersenii_serovar_Hardjo_bovis_L550_chromosome_1	639633033
NODE_8679_length_17708_cov_61.394001	17792	3669679	288	15	16	1	Leptospira_borgpetersenii_serovar_Hardjo_bovis_L550_chromosome_1	639633033
NODE_8680_length_2169_cov_61.355465	2253	3669679	288	15	16	1	Leptospira_borgpetersenii_serovar_Hardjo_bovis_L550_chromosome_1	639633033
NODE_8681_length_920_cov_121.430435	1004	3669679	288	15	0	1	Leptospira_borgpetersenii_serovar_Hardjo_bovis_L550_chromosome_1	639633033
NODE_8682_length_1011_cov_122.587540	1095	3669679	288	15	0	1	Leptospira_borgpetersenii_serovar_Hardjo_bovis_L550_chromosome_1	639633033
NODE_8683_length_24182_cov_61.844513	24266	3669679	288	15	16	1	Leptospira_borgpetersenii_serovar_Hardjo_bovis_L550_chromosome_1	639633033
NODE_8684_length_12638_cov_61.535767	12722	3669679	288	15	16	1	Leptospira_borgpetersenii_serovar_Hardjo_bovis_L550_chromosome_1	639633033
NODE_8685_length_15708_cov_61.748409	15792	3669679	288	15	16	1	Leptospira_borgpetersenii_serovar_Hardjo_bovis_L550_chromosome_1	639633033
NODE_8686_length_8842_cov_61.662521	8926	3669679	288	15	0	1	Leptospira_borgpetersenii_serovar_Hardjo_bovis_L550_chromosome_1	639633033
NODE_8687_length_14669_cov_61.241665	14753	3669679	288	15	16	1	Leptospira_borgpetersenii_serovar_Hardjo_bovis_L550_chromosome_1	639633033
NODE_8688_length_24424_cov_61.360180	24508	3669679	288	15	16	1	Leptospira_borgpetersenii_serovar_Hardjo_bovis_L550_chromosome_1	639633033
NODE_8689_length_10221_cov_62.074749	10305	3669679	288	15	16	1	Leptospira_borgpetersenii_serovar_Hardjo_bovis_L550_chromosome_1	639633033
NODE_8690_length_14171_cov_61.180016	14255	3669679	288	15	16	1	Leptospira_borgpetersenii_serovar_Hardjo_bovis_L550_chromosome_1	639633033
NODE_8691_length_19990_cov_61.314209	20074	3669679	288	15	16	1	Leptospira_borgpetersenii_serovar_Hardjo_bovis_L550_chromosome_1	639633033
NODE_8692_length_5749_cov_61.571228	5833	3669679	288	15	16	1	Leptospira_borgpetersenii_serovar_Hardjo_bovis_L550_chromosome_1	639633033
NODE_8695_length_15009_cov_61.130390	15093	3669679	288	15	16	1	Leptospira_borgpetersenii_serovar_Hardjo_bovis_L550_chromosome_1	639633033
NODE_8696_length_22007_cov_61.684826	22091	3669679	288	15	16	1	Leptospira_borgpetersenii_serovar_Hardjo_bovis_L550_chromosome_1	639633033
NODE_8698_length_4469_cov_62.185051	4553	3669679	288	15	16	1	Leptospira_borgpetersenii_serovar_Hardjo_bovis_L550_chromosome_1	639633033
NODE_8699_length_28847_cov_61.340694	28931	3669679	288	15	16	1	Leptospira_borgpetersenii_serovar_Hardjo_bovis_L550_chromosome_1	639633033
NODE_8702_length_5160_cov_61.275776	5244	3669679	288	15	0	1	Leptospira_borgpetersenii_serovar_Hardjo_bovis_L550_chromosome_1	639633033
NODE_8703_length_28992_cov_61.499657	29076	3669679	288	15	16	1	Leptospira_borgpetersenii_serovar_Hardjo_bovis_L550_chromosome_1	639633033
NODE_8706_length_3227_cov_60.380848	3311	3669679	288	15	16	1	Leptospira_borgpetersenii_serovar_Hardjo_bovis_L550_chromosome_1	639633033
NODE_8707_length_2317_cov_60.248596	2401	3669679	288	15	16	1	Leptospira_borgpetersenii_serovar_Hardjo_bovis_L550_chromosome_1	639633033
NODE_8710_length_5188_cov_60.920780	5272	3669679	288	15	16	1	Leptospira_borgpetersenii_serovar_Hardjo_bovis_L550_chromosome_1	639633033
NODE_8711_length_2383_cov_61.532101	2467	3669679	288	15	16	1	Leptospira_borgpetersenii_serovar_Hardjo_bovis_L550_chromosome_1	639633033
NODE_8712_length_8852_cov_61.161884	8936	3669679	288	15	16	1	Leptospira_borgpetersenii_serovar_Hardjo_bovis_L550_chromosome_1	639633033
NODE_8713_length_3914_cov_60.889881	3998	3669679	288	15	16	1	Leptospira_borgpetersenii_serovar_Hardjo_bovis_L550_chromosome_1	639633033
NODE_8715_length_2338_cov_61.231823	2422	3669679	288	15	16	1	Leptospira_borgpetersenii_serovar_Hardjo_bovis_L550_chromosome_1	639633033
NODE_8718_length_9261_cov_62.254616	9345	3669679	288	15	16	1	Leptospira_borgpetersenii_serovar_Hardjo_bovis_L550_chromosome_1	639633033
NODE_8719_length_17767_cov_61.364719	17851	3669679	288	15	16	1	Leptospira_borgpetersenii_serovar_Hardjo_bovis_L550_chromosome_1	639633033
NODE_8721_length_5138_cov_61.065979	5222	3669679	288	15	0	1	Leptospira_borgpetersenii_serovar_Hardjo_bovis_L550_chromosome_1	639633033
NODE_8722_length_4609_cov_61.577782	4693	3669679	288	15	16	1	Leptospira_borgpetersenii_serovar_Hardjo_bovis_L550_chromosome_1	639633033
NODE_8723_length_9744_cov_61.930214	9828	3669679	288	15	16	1	Leptospira_borgpetersenii_serovar_Hardjo_bovis_L550_chromosome_1	639633033
NODE_8724_length_1842_cov_60.111294	1926	3669679	288	15	0	1	Leptospira_borgpetersenii_serovar_Hardjo_bovis_L550_chromosome_1	639633033
NODE_8725_length_3851_cov_61.363800	3935	3669679	288	15	16	1	Leptospira_borgpetersenii_serovar_Hardjo_bovis_L550_chromosome_1	639633033
NODE_8726_length_5518_cov_61.400509	5602	3669679	288	15	16	1	Leptospira_borgpetersenii_serovar_Hardjo_bovis_L550_chromosome_1	639633033
NODE_8727_length_12327_cov_60.977203	12411	3669679	288	15	0	1	Leptospira_borgpetersenii_serovar_Hardjo_bovis_L550_chromosome_1	639633033
NODE_8728_length_13632_cov_61.008728	13716	3669679	288	15	16	1	Leptospira_borgpetersenii_serovar_Hardjo_bovis_L550_chromosome_1	639633033
NODE_8729_length_2592_cov_60.210262	2676	3669679	288	15	45	1	Leptospira_borgpetersenii_serovar_Hardjo_bovis_L550_chromosome_1	639633033
NODE_8730_length_6308_cov_61.809132	6392	3669679	288	15	16	1	Leptospira_borgpetersenii_serovar_Hardjo_bovis_L550_chromosome_1	639633033
NODE_8731_length_11438_cov_60.821209	11522	3669679	288	15	16	1	Leptospira_borgpetersenii_serovar_Hardjo_bovis_L550_chromosome_1	639633033
NODE_8735_length_20150_cov_61.327744	20234	3669679	288	15	16	1	Leptospira_borgpetersenii_serovar_Hardjo_bovis_L550_chromosome_1	639633033
NODE_8736_length_621_cov_59.310787	705	3669679	288	15	0	1	Leptospira_borgpetersenii_serovar_Hardjo_bovis_L550_chromosome_1	639633033
NODE_8737_length_8490_cov_60.464901	8574	3669679	288	15	16	1	Leptospira_borgpetersenii_serovar_Hardjo_bovis_L550_chromosome_1	639633033
NODE_8738_length_7975_cov_61.435108	8059	3669679	288	15	16	1	Leptospira_borgpetersenii_serovar_Hardjo_bovis_L550_chromosome_1	639633033
NODE_8739_length_20024_cov_61.726227	20108	3669679	288	15	16	1	Leptospira_borgpetersenii_serovar_Hardjo_bovis_L550_chromosome_1	639633033
NODE_8742_length_1239_cov_63.376915	1323	3669679	288	15	0	1	Leptospira_borgpetersenii_serovar_Hardjo_bovis_L550_chromosome_1	639633033
NODE_8743_length_7696_cov_61.785862	7780	3669679	288	15	32	1	Leptospira_borgpetersenii_serovar_Hardjo_bovis_L550_chromosome_1	639633033
NODE_8745_length_11773_cov_61.853222	11857	3669679	288	15	16	1	Leptospira_borgpetersenii_serovar_Hardjo_bovis_L550_chromosome_1	639633033
NODE_8746_length_4034_cov_61.067429	4118	3669679	288	15	0	1	Leptospira_borgpetersenii_serovar_Hardjo_bovis_L550_chromosome_1	639633033
NODE_8747_length_14093_cov_61.769459	14177	3669679	288	15	16	1	Leptospira_borgpetersenii_serovar_Hardjo_bovis_L550_chromosome_1	639633033
NODE_8748_length_3773_cov_61.852108	3857	3669679	288	15	16	1	Leptospira_borgpetersenii_serovar_Hardjo_bovis_L550_chromosome_1	639633033
NODE_8749_length_11024_cov_60.854862	11108	3669679	288	15	16	1	Leptospira_borgpetersenii_serovar_Hardjo_bovis_L550_chromosome_1	639633033
NODE_8752_length_2688_cov_61.667038	2772	3669679	288	15	16	1	Leptospira_borgpetersenii_serovar_Hardjo_bovis_L550_chromosome_1	639633033
NODE_8753_length_18885_cov_61.581257	18969	3669679	288	15	16	1	Leptospira_borgpetersenii_serovar_Hardjo_bovis_L550_chromosome_1	639633033
NODE_8754_length_3095_cov_62.126656	3179	3669679	288	15	0	1	Leptospira_borgpetersenii_serovar_Hardjo_bovis_L550_chromosome_1	639633033
NODE_8755_length_8696_cov_61.291283	8780	3669679	288	15	16	1	Leptospira_borgpetersenii_serovar_Hardjo_bovis_L550_chromosome_1	639633033
NODE_8756_length_436_cov_63.084862	520	3669679	288	15	0	1	Leptospira_borgpetersenii_serovar_Hardjo_bovis_L550_chromosome_1	639633033
NODE_8757_length_2595_cov_61.585743	2679	3669679	288	15	16	1	Leptospira_borgpetersenii_serovar_Hardjo_bovis_L550_chromosome_1	639633033
NODE_8759_length_8502_cov_61.408257	8586	3669679	288	15	16	1	Leptospira_borgpetersenii_serovar_Hardjo_bovis_L550_chromosome_1	639633033
NODE_8760_length_13799_cov_61.376259	13883	3669679	288	15	16	1	Leptospira_borgpetersenii_serovar_Hardjo_bovis_L550_chromosome_1	639633033
NODE_8761_length_9206_cov_62.386269	9290	3669679	288	15	16	1	Leptospira_borgpetersenii_serovar_Hardjo_bovis_L550_chromosome_1	639633033
NODE_8765_length_5058_cov_61.434757	5142	3669679	288	15	16	1	Leptospira_borgpetersenii_serovar_Hardjo_bovis_L550_chromosome_1	639633033
NODE_8766_length_35148_cov_61.492859	35232	3669679	288	15	16	1	Leptospira_borgpetersenii_serovar_Hardjo_bovis_L550_chromosome_1	639633033
NODE_8768_length_10759_cov_60.424854	10843	3669679	288	15	16	1	Leptospira_borgpetersenii_serovar_Hardjo_bovis_L550_chromosome_1	639633033
NODE_8769_length_12011_cov_61.436016	12095	3669679	288	15	16	1	Leptospira_borgpetersenii_serovar_Hardjo_bovis_L550_chromosome_1	639633033
NODE_8770_length_15712_cov_61.058556	15796	3669679	288	15	16	1	Leptospira_borgpetersenii_serovar_Hardjo_bovis_L550_chromosome_1	639633033
NODE_8773_length_3286_cov_61.338406	3370	3669679	288	15	16	1	Leptospira_borgpetersenii_serovar_Hardjo_bovis_L550_chromosome_1	639633033
NODE_8774_length_4626_cov_61.729790	4710	3669679	288	15	16	1	Leptospira_borgpetersenii_serovar_Hardjo_bovis_L550_chromosome_1	639633033
NODE_8775_length_14485_cov_62.096237	14569	3669679	288	15	16	1	Leptospira_borgpetersenii_serovar_Hardjo_bovis_L550_chromosome_1	639633033
NODE_8777_length_1033_cov_63.310745	1117	3669679	288	15	0	1	Leptospira_borgpetersenii_serovar_Hardjo_bovis_L550_chromosome_1	639633033
NODE_8778_length_5904_cov_61.198509	5988	3669679	288	15	16	1	Leptospira_borgpetersenii_serovar_Hardjo_bovis_L550_chromosome_1	639633033
NODE_8780_length_6234_cov_59.111324	6318	3669679	288	15	16	1	Leptospira_borgpetersenii_serovar_Hardjo_bovis_L550_chromosome_1	639633033
NODE_8782_length_1373_cov_123.466858	1457	3669679	288	15	0	1	Leptospira_borgpetersenii_serovar_Hardjo_bovis_L550_chromosome_1	639633033
NODE_8783_length_5241_cov_60.872162	5325	3669679	288	15	16	1	Leptospira_borgpetersenii_serovar_Hardjo_bovis_L550_chromosome_1	639633033
NODE_8784_length_1728_cov_60.751736	1812	3669679	288	15	0	1	Leptospira_borgpetersenii_serovar_Hardjo_bovis_L550_chromosome_1	639633033
NODE_8786_length_15961_cov_61.550217	16045	3669679	288	15	16	1	Leptospira_borgpetersenii_serovar_Hardjo_bovis_L550_chromosome_1	639633033
NODE_8788_length_3687_cov_61.893139	3771	3669679	288	15	16	1	Leptospira_borgpetersenii_serovar_Hardjo_bovis_L550_chromosome_1	639633033
NODE_8789_length_7695_cov_61.874985	7779	3669679	288	15	16	1	Leptospira_borgpetersenii_serovar_Hardjo_bovis_L550_chromosome_1	639633033
NODE_8790_length_1210_cov_62.945454	1294	3669679	288	15	0	1	Leptospira_borgpetersenii_serovar_Hardjo_bovis_L550_chromosome_1	639633033
NODE_8794_length_8686_cov_61.642872	8770	3669679	288	15	16	1	Leptospira_borgpetersenii_serovar_Hardjo_bovis_L550_chromosome_1	639633033
NODE_8796_length_5744_cov_61.789867	5828	3669679	288	15	16	1	Leptospira_borgpetersenii_serovar_Hardjo_bovis_L550_chromosome_1	639633033
NODE_8797_length_11664_cov_62.041752	11748	3669679	288	15	16	1	Leptospira_borgpetersenii_serovar_Hardjo_bovis_L550_chromosome_1	639633033
NODE_8798_length_8825_cov_61.627987	8909	3669679	288	15	16	1	Leptospira_borgpetersenii_serovar_Hardjo_bovis_L550_chromosome_1	639633033
NODE_8800_length_10098_cov_61.612202	10182	3669679	288	15	16	1	Leptospira_borgpetersenii_serovar_Hardjo_bovis_L550_chromosome_1	639633033
NODE_8801_length_1262_cov_121.339935	1346	3669679	288	15	0	1	Leptospira_borgpetersenii_serovar_Hardjo_bovis_L550_chromosome_2	639633033
NODE_8803_length_8417_cov_61.389095	8501	3669679	288	15	16	1	Leptospira_borgpetersenii_serovar_Hardjo_bovis_L550_chromosome_1	639633033
NODE_8805_length_2171_cov_60.170891	2255	3669679	288	15	16	1	Leptospira_borgpetersenii_serovar_Hardjo_bovis_L550_chromosome_1	639633033
NODE_8806_length_1826_cov_60.468235	1910	3669679	288	15	0	1	Leptospira_borgpetersenii_serovar_Hardjo_bovis_L550_chromosome_1	639633033
NODE_8813_length_4013_cov_61.425117	4097	3669679	288	15	16	1	Leptospira_borgpetersenii_serovar_Hardjo_bovis_L550_chromosome_1	639633033
NODE_8816_length_716_cov_125.061455	800	3669679	288	15	0	0	Leptospira_borgpetersenii_serovar_Hardjo_bovis_L550_chromosome_1	639633033
NODE_8823_length_6146_cov_60.790272	6230	3669679	288	15	16	1	Leptospira_borgpetersenii_serovar_Hardjo_bovis_L550_chromosome_1	639633033
NODE_8824_length_4174_cov_61.382847	4258	3669679	288	15	0	1	Leptospira_borgpetersenii_serovar_Hardjo_bovis_L550_chromosome_1	639633033
NODE_8829_length_2276_cov_61.855888	2360	3669679	288	15	16	1	Leptospira_borgpetersenii_serovar_Hardjo_bovis_L550_chromosome_1	639633033
NODE_8835_length_4558_cov_60.917946	4642	3669679	288	15	16	1	Leptospira_borgpetersenii_serovar_Hardjo_bovis_L550_chromosome_1	639633033
NODE_8838_length_2596_cov_61.885979	2680	3669679	288	15	16	1	Leptospira_borgpetersenii_serovar_Hardjo_bovis_L550_chromosome_1	639633033
NODE_8842_length_4031_cov_60.483501	4115	3669679	288	15	16	1	Leptospira_borgpetersenii_serovar_Hardjo_bovis_L550_chromosome_1	639633033
NODE_8843_length_19150_cov_61.143082	19234	3669679	288	15	16	1	Leptospira_borgpetersenii_serovar_Hardjo_bovis_L550_chromosome_1	639633033
NODE_8844_length_16720_cov_61.577454	16804	3669679	288	15	16	1	Leptospira_borgpetersenii_serovar_Hardjo_bovis_L550_chromosome_1	639633033
NODE_8845_length_1547_cov_61.968327	1631	3669679	288	15	0	1	Leptospira_borgpetersenii_serovar_Hardjo_bovis_L550_chromosome_1	639633033
NODE_8846_length_11691_cov_61.120777	11775	3669679	288	15	0	1	Leptospira_borgpetersenii_serovar_Hardjo_bovis_L550_chromosome_1	639633033
NODE_8851_length_3548_cov_60.855412	3632	3669679	288	15	16	1	Leptospira_borgpetersenii_serovar_Hardjo_bovis_L550_chromosome_1	639633033
NODE_8853_length_15115_cov_61.416210	15199	3669679	288	15	16	1	Leptospira_borgpetersenii_serovar_Hardjo_bovis_L550_chromosome_1	639633033
NODE_8861_length_3733_cov_61.881062	3817	3669679	288	15	16	1	Leptospira_borgpetersenii_serovar_Hardjo_bovis_L550_chromosome_1	639633033
NODE_8862_length_709_cov_64.489418	793	3669679	288	15	0	1	Leptospira_borgpetersenii_serovar_Hardjo_bovis_L550_chromosome_1	639633033
NODE_8865_length_870_cov_125.103447	954	3669679	288	15	0	0	Leptospira_borgpetersenii_serovar_Hardjo_bovis_L550_chromosome_1	639633033
NODE_8869_length_1562_cov_61.597950	1646	3669679	288	15	0	1	Leptospira_borgpetersenii_serovar_Hardjo_bovis_L550_chromosome_1	639633033
NODE_8871_length_4258_cov_61.466415	4342	3669679	288	15	16	1	Leptospira_borgpetersenii_serovar_Hardjo_bovis_L550_chromosome_1	639633033
NODE_8874_length_1884_cov_61.860405	1968	3669679	288	15	0	1	Leptospira_borgpetersenii_serovar_Hardjo_bovis_L550_chromosome_1	639633033
NODE_8879_length_4612_cov_61.195145	4696	3669679	288	15	16	1	Leptospira_borgpetersenii_serovar_Hardjo_bovis_L550_chromosome_1	639633033
NODE_8880_length_2284_cov_62.990807	2368	3669679	288	15	16	1	Leptospira_borgpetersenii_serovar_Hardjo_bovis_L550_chromosome_1	639633033
NODE_8881_length_508_cov_125.255905	592	3669679	288	15	0	1	Leptospira_borgpetersenii_serovar_Hardjo_bovis_L550_chromosome_1	639633033
NODE_8883_length_1947_cov_62.377502	2031	3669679	288	15	16	1	Leptospira_borgpetersenii_serovar_Hardjo_bovis_L550_chromosome_1	639633033
NODE_8885_length_1194_cov_61.953098	1278	3669679	288	15	0	1	Leptospira_borgpetersenii_serovar_Hardjo_bovis_L550_chromosome_1	639633033
NODE_8886_length_9663_cov_62.118183	9747	3669679	288	15	16	1	Leptospira_borgpetersenii_serovar_Hardjo_bovis_L550_chromosome_1	639633033
NODE_8889_length_1263_cov_59.541569	1347	3669679	288	15	0	1	Leptospira_borgpetersenii_serovar_Hardjo_bovis_L550_chromosome_1	639633033
NODE_8892_length_6520_cov_61.315491	6604	3669679	288	15	16	1	Leptospira_borgpetersenii_serovar_Hardjo_bovis_L550_chromosome_1	639633033
NODE_8896_length_4819_cov_61.268726	4903	3669679	288	15	16	1	Leptospira_borgpetersenii_serovar_Hardjo_bovis_L550_chromosome_1	639633033
NODE_8897_length_3591_cov_60.513229	3675	3669679	288	15	16	1	Leptospira_borgpetersenii_serovar_Hardjo_bovis_L550_chromosome_1	639633033
NODE_8898_length_5821_cov_61.286892	5905	3669679	288	15	16	1	Leptospira_borgpetersenii_serovar_Hardjo_bovis_L550_chromosome_1	639633033
NODE_8899_length_593_cov_121.581787	677	3669679	288	15	0	1	Leptospira_borgpetersenii_serovar_Hardjo_bovis_L550_chromosome_1	639633033
NODE_8903_length_4589_cov_61.741119	4673	3669679	288	15	16	1	Leptospira_borgpetersenii_serovar_Hardjo_bovis_L550_chromosome_1	639633033
NODE_8907_length_2001_cov_62.003998	2085	3669679	288	15	0	1	Leptospira_borgpetersenii_serovar_Hardjo_bovis_L550_chromosome_1	639633033
NODE_8910_length_1272_cov_122.138367	1356	3669679	288	15	0	1	Leptospira_borgpetersenii_serovar_Hardjo_bovis_L550_chromosome_2	639633033
NODE_8913_length_1602_cov_60.455055	1686	3669679	288	15	0	1	Leptospira_borgpetersenii_serovar_Hardjo_bovis_L550_chromosome_1	639633033
NODE_8922_length_1368_cov_63.423244	1452	3669679	288	15	0	1	Leptospira_borgpetersenii_serovar_Hardjo_bovis_L550_chromosome_1	639633033
NODE_8927_length_717_cov_61.170155	801	3669679	288	15	0	0	Leptospira_borgpetersenii_serovar_Hardjo_bovis_L550_chromosome_1	639633033
NODE_8940_length_1957_cov_62.118038	2041	3669679	288	15	16	1	Leptospira_borgpetersenii_serovar_Hardjo_bovis_L550_chromosome_1	639633033
NODE_8957_length_4860_cov_61.552059	4944	3669679	288	15	16	1	Leptospira_borgpetersenii_serovar_Hardjo_bovis_L550_chromosome_1	639633033
NODE_8962_length_2435_cov_62.214783	2519	3669679	288	15	16	1	Leptospira_borgpetersenii_serovar_Hardjo_bovis_L550_chromosome_1	639633033
NODE_8970_length_742_cov_118.739891	826	3669679	288	15	0	0	Leptospira_borgpetersenii_serovar_Hardjo_bovis_L550_chromosome_1	639633033
NODE_8979_length_631_cov_62.438984	715	3669679	288	15	0	1	Leptospira_borgpetersenii_serovar_Hardjo_bovis_L550_chromosome_1	639633033
NODE_8982_length_460_cov_63.410870	544	3669679	288	15	0	1	Leptospira_borgpetersenii_serovar_Hardjo_bovis_L550_chromosome_1	639633033
NODE_8993_length_2502_cov_61.371304	2586	3669679	288	15	16	1	Leptospira_borgpetersenii_serovar_Hardjo_bovis_L550_chromosome_1	639633033
NODE_8994_length_3404_cov_62.339012	3488	3669679	288	15	0	1	Leptospira_borgpetersenii_serovar_Hardjo_bovis_L550_chromosome_1	639633033
NODE_8997_length_1863_cov_61.582394	1947	3669679	288	15	0	1	Leptospira_borgpetersenii_serovar_Hardjo_bovis_L550_chromosome_1	639633033
NODE_8998_length_5224_cov_60.130169	5308	3669679	288	15	16	1	Leptospira_borgpetersenii_serovar_Hardjo_bovis_L550_chromosome_1	639633033
NODE_8999_length_682_cov_62.379765	766	3669679	288	15	0	1	Leptospira_borgpetersenii_serovar_Hardjo_bovis_L550_chromosome_1	639633033
NODE_9007_length_1550_cov_61.281292	1634	3669679	288	15	0	1	Leptospira_borgpetersenii_serovar_Hardjo_bovis_L550_chromosome_1	639633033
NODE_9008_length_3956_cov_61.964104	4040	3669679	288	15	16	1	Leptospira_borgpetersenii_serovar_Hardjo_bovis_L550_chromosome_1	639633033
NODE_9015_length_529_cov_62.682419	613	3669679	288	15	0	0	Leptospira_borgpetersenii_serovar_Hardjo_bovis_L550_chromosome_1	639633033
NODE_9028_length_1289_cov_61.463924	1373	3669679	288	15	0	1	Leptospira_borgpetersenii_serovar_Hardjo_bovis_L550_chromosome_1	639633033
NODE_9030_length_1947_cov_61.907551	2031	3669679	288	15	16	1	Leptospira_borgpetersenii_serovar_Hardjo_bovis_L550_chromosome_1	639633033
NODE_9037_length_1488_cov_61.945564	1572	3669679	288	15	0	1	Leptospira_borgpetersenii_serovar_Hardjo_bovis_L550_chromosome_1	639633033
NODE_9039_length_1464_cov_63.060108	1548	3669679	288	15	0	1	Leptospira_borgpetersenii_serovar_Hardjo_bovis_L550_chromosome_1	639633033
NODE_9053_length_728_cov_61.329670	812	3669679	288	15	0	1	Leptospira_borgpetersenii_serovar_Hardjo_bovis_L550_chromosome_1	639633033
NODE_9055_length_526_cov_63.929657	610	3669679	288	15	0	1	Leptospira_borgpetersenii_serovar_Hardjo_bovis_L550_chromosome_1	639633033
NODE_9080_length_479_cov_59.179543	563	3669679	288	15	0	1	Leptospira_borgpetersenii_serovar_Hardjo_bovis_L550_chromosome_1	639633033
NODE_9081_length_560_cov_63.396427	644	3669679	288	15	0	1	Leptospira_borgpetersenii_serovar_Hardjo_bovis_L550_chromosome_1	639633033
NODE_9122_length_640_cov_61.160938	724	3669679	288	15	0	1	Leptospira_borgpetersenii_serovar_Hardjo_bovis_L550_chromosome_1	639633033
NODE_9128_length_496_cov_58.127018	580	3669679	288	15	0	1	Leptospira_borgpetersenii_serovar_Hardjo_bovis_L550_chromosome_1	639633033
NODE_9129_length_1562_cov_59.858513	1646	3669679	288	15	0	1	Leptospira_borgpetersenii_serovar_Hardjo_bovis_L550_chromosome_1	639633033
NODE_9208_length_769_cov_123.465538	853	3669679	288	15	0	1	Leptospira_borgpetersenii_serovar_Hardjo_bovis_L550_chromosome_2	639633033
NODE_9313_length_1021_cov_124.852104	1105	3669679	288	15	0	1	Leptospira_borgpetersenii_serovar_Hardjo_bovis_L550_chromosome_1	639633033
NODE_13411_length_76922_cov_38.605042	77006	5374335	171	3	24	3	Cyanothece_sp_ATCC_51472_Cy51472_Contig1802	2507262054
NODE_13412_length_8644_cov_38.470501	8728	5374335	171	3	24	3	Cyanothece_sp_ATCC_51472_Cy51472_Contig1802	2507262054
NODE_13413_length_55419_cov_38.880367	55503	5374335	171	3	24	3	Cyanothece_sp_ATCC_51472_Cy51472_Contig1802	2507262054
NODE_13414_length_21271_cov_39.117672	21355	5374335	171	3	24	3	Cyanothece_sp_ATCC_51472_Cy51472_Contig1802	2507262054
NODE_13415_length_3141_cov_39.148041	3225	5374335	171	3	24	3	Cyanothece_sp_ATCC_51472_Cy51472_Contig1802	2507262054
NODE_13416_length_3358_cov_38.912151	3442	5374335	171	3	24	3	Cyanothece_sp_ATCC_51472_Cy51472_Contig1802	2507262054
NODE_13417_length_8058_cov_38.523827	8142	5374335	171	3	24	3	Cyanothece_sp_ATCC_51472_Cy51472_Contig1802	2507262054
NODE_13418_length_14816_cov_38.538471	14900	5374335	171	3	24	3	Cyanothece_sp_ATCC_51472_Cy51472_Contig1802	2507262054
NODE_13419_length_2141_cov_39.536667	2225	5374335	171	3	24	3	Cyanothece_sp_ATCC_51472_Cy51472_Contig1802	2507262054
NODE_13420_length_11206_cov_38.589863	11290	5374335	171	3	24	3	Cyanothece_sp_ATCC_51472_Cy51472_Contig1802	2507262054
NODE_13421_length_3045_cov_77.253532	3129	5374335	171	3	24	3	Cyanothece_sp_ATCC_51472_Cy51472_Contig1802	2507262054
NODE_13422_length_17111_cov_39.314476	17195	5374335	171	3	24	3	Cyanothece_sp_ATCC_51472_Cy51472_Contig1802	2507262054
NODE_13423_length_8316_cov_37.965366	8400	5374335	171	3	0	3	Cyanothece_sp_ATCC_51472_Cy51472_Contig1802	2507262054
NODE_13424_length_3059_cov_37.937233	3143	5374335	171	3	24	3	Cyanothece_sp_ATCC_51472_Cy51472_Contig1802	2507262054
NODE_13425_length_13843_cov_38.982445	13927	5374335	171	3	0	3	Cyanothece_sp_ATCC_51472_Cy51472_Contig1802	2507262054
NODE_13426_length_2401_cov_39.483967	2485	5374335	171	3	24	3	Cyanothece_sp_ATCC_51472_Cy51472_Contig1802	2507262054
NODE_13427_length_1048_cov_38.677483	1132	5374335	171	3	0	3	Cyanothece_sp_ATCC_51472_Cy51472_Contig1802	2507262054
NODE_13428_length_5503_cov_38.781574	5587	5374335	171	3	24	3	Cyanothece_sp_ATCC_51472_Cy51472_Contig1802	2507262054
NODE_13430_length_3132_cov_38.179756	3216	5374335	171	3	41	3	Cyanothece_sp_ATCC_51472_Cy51472_Contig1802	2507262054
NODE_13433_length_5619_cov_38.910126	5703	5374335	171	3	24	3	Cyanothece_sp_ATCC_51472_Cy51472_Contig1802	2507262054
NODE_13434_length_796_cov_40.800251	880	5374335	171	3	0	3	Cyanothece_sp_ATCC_51472_Cy51472_Contig1802	2507262054
NODE_13435_length_1029_cov_39.195335	1113	5374335	171	3	0	3	Cyanothece_sp_ATCC_51472_Cy51472_Contig1802	2507262054
NODE_13437_length_483_cov_39.438923	567	5374335	171	3	0	3	Cyanothece_sp_ATCC_51472_Cy51472_Contig1802	2507262054
NODE_15695_length_15340_cov_39.014473	15424	5374335	171	3	24	3	Cyanothece_sp_ATCC_51472_Cy51472_Contig1784	2507262054
NODE_15696_length_2119_cov_38.633789	2203	5374335	171	3	0	3	Cyanothece_sp_ATCC_51472_Cy51472_Contig1784	2507262054
NODE_15701_length_8087_cov_38.523682	8171	5374335	171	3	24	3	Cyanothece_sp_ATCC_51472_Cy51472_Contig1784	2507262054
NODE_9471_length_14600_cov_39.007122	14684	5374335	171	3	0	3	Cyanothece_sp_ATCC_51472_Cy51472_Contig1775	2507262054
NODE_9472_length_6063_cov_38.061028	6147	5374335	171	3	24	3	Cyanothece_sp_ATCC_51472_Cy51472_Contig1793	2507262054
NODE_9473_length_33446_cov_39.000717	33530	5374335	171	3	24	3	Cyanothece_sp_ATCC_51472_Cy51472_Contig1793	2507262054
NODE_9475_length_38586_cov_38.783443	38670	5374335	171	3	24	3	Cyanothece_sp_ATCC_51472_Cy51472_Contig1811	2507262054
NODE_9476_length_18938_cov_38.646637	19022	5374335	171	3	24	3	Cyanothece_sp_ATCC_51472_Cy51472_Contig1811	2507262054
NODE_9477_length_1840_cov_37.144020	1924	5374335	171	3	0	0	Cyanothece_sp_ATCC_51472_Cy51472_Contig1811	2507262054
NODE_9478_length_15323_cov_38.818573	15407	5374335	171	3	24	3	Cyanothece_sp_ATCC_51472_Cy51472_Contig1811	2507262054
NODE_9479_length_150964_cov_38.783775	151048	5374335	171	3	24	3	Cyanothece_sp_ATCC_51472_Cy51472_Contig1811	2507262054
NODE_9480_length_25861_cov_39.002590	25945	5374335	171	3	24	3	Cyanothece_sp_ATCC_51472_Cy51472_Contig1811	2507262054
NODE_9481_length_22638_cov_38.567230	22722	5374335	171	3	24	3	Cyanothece_sp_ATCC_51472_Cy51472_Contig1811	2507262054
NODE_9482_length_47188_cov_38.845936	47272	5374335	171	3	24	3	Cyanothece_sp_ATCC_51472_Cy51472_Contig1811	2507262054
NODE_9483_length_53702_cov_38.794456	53786	5374335	171	3	24	3	Cyanothece_sp_ATCC_51472_Cy51472_Contig1811	2507262054
NODE_9484_length_101313_cov_38.860214	101397	5374335	171	3	24	3	Cyanothece_sp_ATCC_51472_Cy51472_Contig1811	2507262054
NODE_9485_length_27154_cov_38.703579	27238	5374335	171	3	24	3	Cyanothece_sp_ATCC_51472_Cy51472_Contig1811	2507262054
NODE_9486_length_43803_cov_38.299156	43887	5374335	171	3	24	3	Cyanothece_sp_ATCC_51472_Cy51472_Contig1811	2507262054
NODE_9487_length_79986_cov_38.849060	80070	5374335	171	3	24	3	Cyanothece_sp_ATCC_51472_Cy51472_Contig1811	2507262054
NODE_9488_length_22000_cov_38.802181	22084	5374335	171	3	24	3	Cyanothece_sp_ATCC_51472_Cy51472_Contig1811	2507262054
NODE_9489_length_28792_cov_38.858295	28876	5374335	171	3	24	3	Cyanothece_sp_ATCC_51472_Cy51472_Contig1811	2507262054
NODE_9490_length_61784_cov_38.745049	61868	5374335	171	3	24	3	Cyanothece_sp_ATCC_51472_Cy51472_Contig1811	2507262054
NODE_9491_length_128337_cov_38.787838	128421	5374335	171	3	24	3	Cyanothece_sp_ATCC_51472_Cy51472_Contig1811	2507262054
NODE_9492_length_5651_cov_39.294285	5735	5374335	171	3	24	3	Cyanothece_sp_ATCC_51472_Cy51472_Contig1811	2507262054
NODE_9493_length_47601_cov_38.877796	47685	5374335	171	3	24	3	Cyanothece_sp_ATCC_51472_Cy51472_Contig1811	2507262054
NODE_9494_length_43153_cov_38.850300	43237	5374335	171	3	24	3	Cyanothece_sp_ATCC_51472_Cy51472_Contig1811	2507262054
NODE_9495_length_60818_cov_38.595795	60902	5374335	171	3	24	3	Cyanothece_sp_ATCC_51472_Cy51472_Contig1811	2507262054
NODE_9496_length_107603_cov_38.844578	107687	5374335	171	3	24	3	Cyanothece_sp_ATCC_51472_Cy51472_Contig1811	2507262054
NODE_9497_length_111128_cov_38.587124	111212	5374335	171	3	24	3	Cyanothece_sp_ATCC_51472_Cy51472_Contig1811	2507262054
NODE_9498_length_154960_cov_38.975845	155044	5374335	171	3	24	3	Cyanothece_sp_ATCC_51472_Cy51472_Contig1811	2507262054
NODE_9499_length_126871_cov_38.874683	126955	5374335	171	3	24	3	Cyanothece_sp_ATCC_51472_Cy51472_Contig1811	2507262054
NODE_9500_length_826_cov_117.497581	910	5374335	171	3	0	0	Cyanothece_sp_ATCC_51472_Cy51472_Contig1811	2507262054
NODE_9501_length_87851_cov_38.805138	87935	5374335	171	3	24	3	Cyanothece_sp_ATCC_51472_Cy51472_Contig1811	2507262054
NODE_9502_length_34782_cov_39.130585	34866	5374335	171	3	24	3	Cyanothece_sp_ATCC_51472_Cy51472_Contig1811	2507262054
NODE_9503_length_49845_cov_38.717144	49929	5374335	171	3	24	3	Cyanothece_sp_ATCC_51472_Cy51472_Contig1811	2507262054
NODE_9504_length_15371_cov_39.110729	15455	5374335	171	3	24	3	Cyanothece_sp_ATCC_51472_Cy51472_Contig1811	2507262054
NODE_9505_length_230937_cov_38.722050	231021	5374335	171	3	24	3	Cyanothece_sp_ATCC_51472_Cy51472_Contig1811	2507262054
NODE_9506_length_135413_cov_38.798824	135497	5374335	171	3	24	3	Cyanothece_sp_ATCC_51472_Cy51472_Contig1811	2507262054
NODE_9507_length_154398_cov_38.862564	154482	5374335	171	3	24	3	Cyanothece_sp_ATCC_51472_Cy51472_Contig1811	2507262054
NODE_9508_length_64621_cov_38.934402	64705	5374335	171	3	24	3	Cyanothece_sp_ATCC_51472_Cy51472_Contig1811	2507262054
NODE_9509_length_95617_cov_38.833305	95701	5374335	171	3	24	3	Cyanothece_sp_ATCC_51472_Cy51472_Contig1811	2507262054
NODE_9510_length_185310_cov_38.750462	185394	5374335	171	3	24	3	Cyanothece_sp_ATCC_51472_Cy51472_Contig1811	2507262054
NODE_9511_length_28396_cov_38.684532	28480	5374335	171	3	24	3	Cyanothece_sp_ATCC_51472_Cy51472_Contig1811	2507262054
NODE_9512_length_38113_cov_38.712593	38197	5374335	171	3	24	3	Cyanothece_sp_ATCC_51472_Cy51472_Contig1811	2507262054
NODE_9513_length_6989_cov_38.015739	7073	5374335	171	3	24	3	Cyanothece_sp_ATCC_51472_Cy51472_Contig1811	2507262054
NODE_9514_length_84320_cov_38.827148	84404	5374335	171	3	24	3	Cyanothece_sp_ATCC_51472_Cy51472_Contig1811	2507262054
NODE_9515_length_29997_cov_38.888855	30081	5374335	171	3	24	3	Cyanothece_sp_ATCC_51472_Cy51472_Contig1811	2507262054
NODE_9516_length_10017_cov_38.605473	10101	5374335	171	3	24	3	Cyanothece_sp_ATCC_51472_Cy51472_Contig1811	2507262054
NODE_9517_length_63180_cov_38.831783	63264	5374335	171	3	24	3	Cyanothece_sp_ATCC_51472_Cy51472_Contig1811	2507262054
NODE_9518_length_76172_cov_38.905502	76256	5374335	171	3	24	3	Cyanothece_sp_ATCC_51472_Cy51472_Contig1811	2507262054
NODE_9519_length_256684_cov_38.733925	256768	5374335	171	3	24	3	Cyanothece_sp_ATCC_51472_Cy51472_Contig1811	2507262054
NODE_9520_length_48655_cov_39.026142	48739	5374335	171	3	24	3	Cyanothece_sp_ATCC_51472_Cy51472_Contig1811	2507262054
NODE_9521_length_47537_cov_38.359364	47621	5374335	171	3	24	3	Cyanothece_sp_ATCC_51472_Cy51472_Contig1811	2507262054
NODE_9522_length_102504_cov_38.639420	102588	5374335	171	3	24	3	Cyanothece_sp_ATCC_51472_Cy51472_Contig1811	2507262054
NODE_9523_length_99550_cov_38.779789	99634	5374335	171	3	24	3	Cyanothece_sp_ATCC_51472_Cy51472_Contig1811	2507262054
NODE_9524_length_64689_cov_38.756233	64773	5374335	171	3	24	3	Cyanothece_sp_ATCC_51472_Cy51472_Contig1811	2507262054
NODE_9525_length_58484_cov_38.858917	58568	5374335	171	3	24	3	Cyanothece_sp_ATCC_51472_Cy51472_Contig1811	2507262054
NODE_9526_length_16897_cov_38.958157	16981	5374335	171	3	24	3	Cyanothece_sp_ATCC_51472_Cy51472_Contig1811	2507262054
NODE_9527_length_133438_cov_38.785683	133522	5374335	171	3	24	3	Cyanothece_sp_ATCC_51472_Cy51472_Contig1811	2507262054
NODE_9528_length_1513_cov_37.765366	1597	5374335	171	3	0	3	Cyanothece_sp_ATCC_51472_Cy51472_Contig1811	2507262054
NODE_9529_length_17653_cov_38.790234	17737	5374335	171	3	24	3	Cyanothece_sp_ATCC_51472_Cy51472_Contig1811	2507262054
NODE_9530_length_9422_cov_38.804394	9506	5374335	171	3	24	3	Cyanothece_sp_ATCC_51472_Cy51472_Contig1811	2507262054
NODE_9532_length_68137_cov_38.754185	68221	5374335	171	3	24	3	Cyanothece_sp_ATCC_51472_Cy51472_Contig1811	2507262054
NODE_9533_length_10865_cov_38.622917	10949	5374335	171	3	24	3	Cyanothece_sp_ATCC_51472_Cy51472_Contig1811	2507262054
NODE_9535_length_30900_cov_38.721489	30984	5374335	171	3	24	3	Cyanothece_sp_ATCC_51472_Cy51472_Contig1811	2507262054
NODE_9536_length_34558_cov_38.700157	34642	5374335	171	3	24	3	Cyanothece_sp_ATCC_51472_Cy51472_Contig1811	2507262054
NODE_9537_length_17199_cov_38.946800	17283	5374335	171	3	24	3	Cyanothece_sp_ATCC_51472_Cy51472_Contig1811	2507262054
NODE_9538_length_21913_cov_38.478302	21997	5374335	171	3	24	3	Cyanothece_sp_ATCC_51472_Cy51472_Contig1811	2507262054
NODE_9539_length_32405_cov_38.993767	32489	5374335	171	3	24	3	Cyanothece_sp_ATCC_51472_Cy51472_Contig1811	2507262054
NODE_9540_length_35172_cov_38.760464	35256	5374335	171	3	24	3	Cyanothece_sp_ATCC_51472_Cy51472_Contig1811	2507262054
NODE_9541_length_56533_cov_38.589939	56617	5374335	171	3	24	3	Cyanothece_sp_ATCC_51472_Cy51472_Contig1811	2507262054
NODE_9542_length_32256_cov_38.888641	32340	5374335	171	3	24	3	Cyanothece_sp_ATCC_51472_Cy51472_Contig1811	2507262054
NODE_9543_length_20729_cov_39.021179	20813	5374335	171	3	24	3	Cyanothece_sp_ATCC_51472_Cy51472_Contig1811	2507262054
NODE_9544_length_46391_cov_38.862667	46475	5374335	171	3	24	3	Cyanothece_sp_ATCC_51472_Cy51472_Contig1811	2507262054
NODE_9545_length_35587_cov_38.867451	35671	5374335	171	3	24	3	Cyanothece_sp_ATCC_51472_Cy51472_Contig1811	2507262054
NODE_9547_length_2305_cov_37.668980	2389	5374335	171	3	24	3	Cyanothece_sp_ATCC_51472_Cy51472_Contig1811	2507262054
NODE_9548_length_15054_cov_38.644215	15138	5374335	171	3	24	3	Cyanothece_sp_ATCC_51472_Cy51472_Contig1811	2507262054
NODE_9549_length_53876_cov_38.781704	53960	5374335	171	3	24	3	Cyanothece_sp_ATCC_51472_Cy51472_Contig1811	2507262054
NODE_9550_length_4773_cov_38.315105	4857	5374335	171	3	24	3	Cyanothece_sp_ATCC_51472_Cy51472_Contig1811	2507262054
NODE_9551_length_27027_cov_38.317978	27111	5374335	171	3	24	3	Cyanothece_sp_ATCC_51472_Cy51472_Contig1811	2507262054
NODE_9552_length_40880_cov_38.690144	40964	5374335	171	3	24	3	Cyanothece_sp_ATCC_51472_Cy51472_Contig1811	2507262054
NODE_9553_length_38792_cov_38.766678	38876	5374335	171	3	24	3	Cyanothece_sp_ATCC_51472_Cy51472_Contig1811	2507262054
NODE_9554_length_32798_cov_39.212666	32882	5374335	171	3	24	3	Cyanothece_sp_ATCC_51472_Cy51472_Contig1811	2507262054
NODE_9555_length_3853_cov_38.614586	3937	5374335	171	3	24	3	Cyanothece_sp_ATCC_51472_Cy51472_Contig1811	2507262054
NODE_9557_length_8361_cov_39.108002	8445	5374335	171	3	24	3	Cyanothece_sp_ATCC_51472_Cy51472_Contig1811	2507262054
NODE_9558_length_57350_cov_38.818970	57434	5374335	171	3	24	3	Cyanothece_sp_ATCC_51472_Cy51472_Contig1811	2507262054
NODE_9560_length_13890_cov_39.430237	13974	5374335	171	3	24	3	Cyanothece_sp_ATCC_51472_Cy51472_Contig1811	2507262054
NODE_9561_length_5877_cov_38.213543	5961	5374335	171	3	24	3	Cyanothece_sp_ATCC_51472_Cy51472_Contig1811	2507262054
NODE_9562_length_23087_cov_38.666004	23171	5374335	171	3	24	3	Cyanothece_sp_ATCC_51472_Cy51472_Contig1811	2507262054
NODE_9563_length_38884_cov_38.607216	38968	5374335	171	3	24	3	Cyanothece_sp_ATCC_51472_Cy51472_Contig1811	2507262054
NODE_9564_length_4019_cov_39.823837	4103	5374335	171	3	24	3	Cyanothece_sp_ATCC_51472_Cy51472_Contig1811	2507262054
NODE_9565_length_625_cov_37.201599	709	5374335	171	3	0	3	Cyanothece_sp_ATCC_51472_Cy51472_Contig1811	2507262054
NODE_9566_length_13860_cov_38.333405	13944	5374335	171	3	24	3	Cyanothece_sp_ATCC_51472_Cy51472_Contig1811	2507262054
NODE_9567_length_758_cov_158.606857	842	5374335	171	3	0	3	Cyanothece_sp_ATCC_51472_Cy51472_Contig1811	2507262054
NODE_9571_length_16932_cov_38.784138	17016	5374335	171	3	24	3	Cyanothece_sp_ATCC_51472_Cy51472_Contig1811	2507262054
NODE_9572_length_24159_cov_38.895485	24243	5374335	171	3	24	3	Cyanothece_sp_ATCC_51472_Cy51472_Contig1811	2507262054
NODE_9573_length_26169_cov_38.647789	26253	5374335	171	3	24	3	Cyanothece_sp_ATCC_51472_Cy51472_Contig1811	2507262054
NODE_9574_length_22672_cov_38.824234	22756	5374335	171	3	24	3	Cyanothece_sp_ATCC_51472_Cy51472_Contig1811	2507262054
NODE_9575_length_521_cov_76.067177	605	5374335	171	3	0	3	Cyanothece_sp_ATCC_51472_Cy51472_Contig1811	2507262054
NODE_9576_length_607_cov_77.902802	691	5374335	171	3	0	0	Cyanothece_sp_ATCC_51472_Cy51472_Contig1811	2507262054
NODE_9577_length_1801_cov_38.187672	1885	5374335	171	3	0	3	Cyanothece_sp_ATCC_51472_Cy51472_Contig1811	2507262054
NODE_9578_length_8047_cov_38.413074	8131	5374335	171	3	24	3	Cyanothece_sp_ATCC_51472_Cy51472_Contig1811	2507262054
NODE_9579_length_18354_cov_38.599979	18438	5374335	171	3	24	3	Cyanothece_sp_ATCC_51472_Cy51472_Contig1811	2507262054
NODE_9580_length_513_cov_269.900574	597	5374335	171	3	0	0	Cyanothece_sp_ATCC_51472_Cy51472_Contig1802	2507262054
NODE_9581_length_3214_cov_37.959553	3298	5374335	171	3	24	3	Cyanothece_sp_ATCC_51472_Cy51472_Contig1811	2507262054
NODE_9582_length_5888_cov_39.091034	5972	5374335	171	3	24	3	Cyanothece_sp_ATCC_51472_Cy51472_Contig1811	2507262054
NODE_9583_length_8703_cov_38.524303	8787	5374335	171	3	24	3	Cyanothece_sp_ATCC_51472_Cy51472_Contig1811	2507262054
NODE_9584_length_8274_cov_39.262024	8358	5374335	171	3	24	3	Cyanothece_sp_ATCC_51472_Cy51472_Contig1811	2507262054
NODE_9585_length_19137_cov_38.724461	19221	5374335	171	3	24	3	Cyanothece_sp_ATCC_51472_Cy51472_Contig1811	2507262054
NODE_9586_length_6305_cov_39.099129	6389	5374335	171	3	24	3	Cyanothece_sp_ATCC_51472_Cy51472_Contig1811	2507262054
NODE_9587_length_22687_cov_38.485298	22771	5374335	171	3	24	3	Cyanothece_sp_ATCC_51472_Cy51472_Contig1811	2507262054
NODE_9588_length_5334_cov_38.712036	5418	5374335	171	3	24	3	Cyanothece_sp_ATCC_51472_Cy51472_Contig1811	2507262054
NODE_9590_length_1149_cov_78.342033	1233	5374335	171	3	0	3	Cyanothece_sp_ATCC_51472_Cy51472_Contig1811	2507262054
NODE_9591_length_941_cov_76.695007	1025	5374335	171	3	0	3	Cyanothece_sp_ATCC_51472_Cy51472_Contig1811	2507262054
NODE_9592_length_5813_cov_39.530880	5897	5374335	171	3	24	3	Cyanothece_sp_ATCC_51472_Cy51472_Contig1811	2507262054
NODE_9593_length_3004_cov_38.595207	3088	5374335	171	3	24	3	Cyanothece_sp_ATCC_51472_Cy51472_Contig1811	2507262054
NODE_9594_length_742_cov_77.292450	826	5374335	171	3	0	3	Cyanothece_sp_ATCC_51472_Cy51472_Contig1811	2507262054
NODE_9595_length_9773_cov_38.227261	9857	5374335	171	3	24	3	Cyanothece_sp_ATCC_51472_Cy51472_Contig1811	2507262054
NODE_9598_length_3719_cov_38.296852	3803	5374335	171	3	24	3	Cyanothece_sp_ATCC_51472_Cy51472_Contig1811	2507262054
NODE_9600_length_2270_cov_38.362995	2354	5374335	171	3	0	0	Cyanothece_sp_ATCC_51472_Cy51472_Contig1811	2507262054
NODE_9602_length_2409_cov_38.078457	2493	5374335	171	3	0	3	Cyanothece_sp_ATCC_51472_Cy51472_Contig1811	2507262054
NODE_9607_length_841_cov_38.246136	925	5374335	171	3	0	3	Cyanothece_sp_ATCC_51472_Cy51472_Contig1811	2507262054
NODE_9609_length_878_cov_114.130981	962	5374335	171	3	0	3	Cyanothece_sp_ATCC_51472_Cy51472_Contig1811	2507262054
NODE_9610_length_730_cov_503.832886	814	5374335	171	3	0	0	Cyanothece_sp_ATCC_51472_Cy51472_Contig1811	2507262054
NODE_9611_length_1290_cov_76.001549	1374	5374335	171	3	0	3	Cyanothece_sp_ATCC_51472_Cy51472_Contig1811	2507262054
NODE_9612_length_2918_cov_38.111721	3002	5374335	171	3	0	3	Cyanothece_sp_ATCC_51472_Cy51472_Contig1811	2507262054
NODE_9613_length_1171_cov_41.664391	1255	5374335	171	3	0	3	Cyanothece_sp_ATCC_51472_Cy51472_Contig1811	2507262054
NODE_9614_length_1209_cov_40.626965	1293	5374335	171	3	0	0	Cyanothece_sp_ATCC_51472_Cy51472_Contig1811	2507262054
NODE_9615_length_4005_cov_78.021477	4089	5374335	171	3	18	3	Cyanothece_sp_ATCC_51472_Cy51472_Contig1811	2507262054
NODE_9617_length_796_cov_38.954773	880	5374335	171	3	0	3	Cyanothece_sp_ATCC_51472_Cy51472_Contig1811	2507262054
NODE_9620_length_508_cov_155.513779	592	5374335	171	3	0	0	Cyanothece_sp_ATCC_51472_Cy51472_Contig1811	2507262054
NODE_9621_length_451_cov_38.352551	535	5374335	171	3	0	3	Cyanothece_sp_ATCC_51472_Cy51472_Contig1811	2507262054
NODE_9622_length_1050_cov_37.417141	1134	5374335	171	3	0	3	Cyanothece_sp_ATCC_51472_Cy51472_Contig1811	2507262054
NODE_9623_length_3335_cov_38.278862	3419	5374335	171	3	24	3	Cyanothece_sp_ATCC_51472_Cy51472_Contig1811	2507262054
NODE_9624_length_1636_cov_38.611248	1720	5374335	171	3	0	0	Cyanothece_sp_ATCC_51472_Cy51472_Contig1811	2507262054
NODE_9628_length_844_cov_38.646919	928	5374335	171	3	0	3	Cyanothece_sp_ATCC_51472_Cy51472_Contig1811	2507262054
NODE_9633_length_1504_cov_113.140289	1588	5374335	171	3	0	3	Cyanothece_sp_ATCC_51472_Cy51472_Contig1802	2507262054
NODE_9638_length_3904_cov_38.722591	3988	5374335	171	3	24	3	Cyanothece_sp_ATCC_51472_Cy51472_Contig1811	2507262054
NODE_9639_length_487_cov_77.383980	571	5374335	171	3	0	0	Cyanothece_sp_ATCC_51472_Cy51472_Contig1811	2507262054
NODE_9644_length_763_cov_78.365662	847	5374335	171	3	0	3	Cyanothece_sp_ATCC_51472_Cy51472_Contig1811	2507262054
NODE_9665_length_974_cov_77.755646	1058	5374335	171	3	0	3	Cyanothece_sp_ATCC_51472_Cy51472_Contig1811	2507262054
NODE_9681_length_684_cov_271.358185	768	5374335	171	3	0	0	Cyanothece_sp_ATCC_51472_Cy51472_Contig1802	2507262054
NODE_9685_length_2379_cov_116.073143	2463	5374335	171	3	0	3	Cyanothece_sp_ATCC_51472_Cy51472_Contig1811	2507262054
NODE_9693_length_483_cov_37.571430	567	5374335	171	3	0	3	Cyanothece_sp_ATCC_51472_Cy51472_Contig1811	2507262054
NODE_9723_length_4944_cov_39.443367	5028	5374335	171	3	24	4	Cyanothece_sp_ATCC_51472_Cy51472_Contig1757	2507262054
NODE_9724_length_10157_cov_39.113911	10241	5374335	171	3	0	3	Cyanothece_sp_ATCC_51472_Cy51472_Contig1766	2507262054
NODE_9725_length_99315_cov_39.011761	99399	5374335	171	3	24	3	Cyanothece_sp_ATCC_51472_Cy51472_Contig1802	2507262054
NODE_9726_length_44037_cov_38.535004	44121	5374335	171	3	24	3	Cyanothece_sp_ATCC_51472_Cy51472_Contig1802	2507262054
NODE_4505_length_1160_cov_33.332760	1244	3591585	268	16	0	7	Syntrophorhabdus_aromaticivorans_UI_Synar_SAI2	2509601044
NODE_4506_length_28396_cov_40.476898	28480	3591585	268	16	0	7	Syntrophorhabdus_aromaticivorans_UI_Synar_SAI2	2509601044
NODE_4507_length_89057_cov_40.507618	89141	3591585	268	16	17	7	Syntrophorhabdus_aromaticivorans_UI_Synar_SAI2	2509601044
NODE_4508_length_68107_cov_40.159809	68191	3591585	268	16	0	7	Syntrophorhabdus_aromaticivorans_UI_Synar_SAI2	2509601044
NODE_4509_length_81678_cov_40.340237	81762	3591585	268	16	17	7	Syntrophorhabdus_aromaticivorans_UI_Synar_SAI2	2509601044
NODE_4510_length_21283_cov_40.191845	21367	3591585	268	16	0	7	Syntrophorhabdus_aromaticivorans_UI_Synar_SAI2	2509601044
NODE_4511_length_32298_cov_40.573223	32382	3591585	268	16	17	7	Syntrophorhabdus_aromaticivorans_UI_Synar_SAI2	2509601044
NODE_4512_length_32697_cov_40.562866	32781	3591585	268	16	17	7	Syntrophorhabdus_aromaticivorans_UI_Synar_SAI2	2509601044
NODE_4513_length_35156_cov_40.450989	35240	3591585	268	16	17	7	Syntrophorhabdus_aromaticivorans_UI_Synar_SAI2	2509601044
NODE_4514_length_30124_cov_40.146526	30208	3591585	268	16	0	7	Syntrophorhabdus_aromaticivorans_UI_Synar_SAI2	2509601044
NODE_4515_length_83917_cov_40.426849	84001	3591585	268	16	17	7	Syntrophorhabdus_aromaticivorans_UI_Synar_SAI2	2509601044
NODE_4516_length_18048_cov_39.973072	18132	3591585	268	16	0	7	Syntrophorhabdus_aromaticivorans_UI_Synar_SAI2	2509601044
NODE_4517_length_1446_cov_40.920471	1530	3591585	268	16	0	7	Syntrophorhabdus_aromaticivorans_UI_Synar_SAI2	2509601044
NODE_4519_length_539_cov_79.179962	623	3591585	268	16	0	7	Syntrophorhabdus_aromaticivorans_UI_Synar_SAI2	2509601044
NODE_4520_length_492_cov_123.959351	576	3591585	268	16	0	7	Syntrophorhabdus_aromaticivorans_UI_Synar_SAI2	2509601044
NODE_4521_length_10288_cov_40.206455	10372	3591585	268	16	17	7	Syntrophorhabdus_aromaticivorans_UI_Synar_SAI2	2509601044
NODE_4522_length_22193_cov_40.767044	22277	3591585	268	16	17	7	Syntrophorhabdus_aromaticivorans_UI_Synar_SAI2	2509601044
NODE_4523_length_61183_cov_40.651669	61267	3591585	268	16	17	7	Syntrophorhabdus_aromaticivorans_UI_Synar_SAI2	2509601044
NODE_4524_length_26546_cov_40.504444	26630	3591585	268	16	17	7	Syntrophorhabdus_aromaticivorans_UI_Synar_SAI2	2509601044
NODE_4525_length_17897_cov_40.256691	17981	3591585	268	16	17	7	Syntrophorhabdus_aromaticivorans_UI_Synar_SAI2	2509601044
NODE_4526_length_69100_cov_40.425789	69184	3591585	268	16	17	7	Syntrophorhabdus_aromaticivorans_UI_Synar_SAI2	2509601044
NODE_4527_length_97874_cov_40.413349	97958	3591585	268	16	0	7	Syntrophorhabdus_aromaticivorans_UI_Synar_SAI2	2509601044
NODE_4528_length_71586_cov_40.291439	71670	3591585	268	16	0	7	Syntrophorhabdus_aromaticivorans_UI_Synar_SAI2	2509601044
NODE_4529_length_25465_cov_40.130413	25549	3591585	268	16	17	7	Syntrophorhabdus_aromaticivorans_UI_Synar_SAI2	2509601044
NODE_4530_length_18713_cov_40.406937	18797	3591585	268	16	17	7	Syntrophorhabdus_aromaticivorans_UI_Synar_SAI2	2509601044
NODE_4531_length_1287_cov_40.624710	1371	3591585	268	16	0	7	Syntrophorhabdus_aromaticivorans_UI_Synar_SAI2	2509601044
NODE_4532_length_40041_cov_40.401115	40125	3591585	268	16	17	7	Syntrophorhabdus_aromaticivorans_UI_Synar_SAI2	2509601044
NODE_4533_length_1577_cov_77.923904	1661	3591585	268	16	0	7	Syntrophorhabdus_aromaticivorans_UI_Synar_SAI2	2509601044
NODE_4534_length_1535_cov_39.484039	1619	3591585	268	16	0	7	Syntrophorhabdus_aromaticivorans_UI_Synar_SAI2	2509601044
NODE_4535_length_776_cov_38.990978	860	3591585	268	16	0	7	Syntrophorhabdus_aromaticivorans_UI_Synar_SAI2	2509601044
NODE_4536_length_69570_cov_40.225887	69654	3591585	268	16	34	7	Syntrophorhabdus_aromaticivorans_UI_Synar_SAI2	2509601044
NODE_4537_length_9432_cov_40.090965	9516	3591585	268	16	34	7	Syntrophorhabdus_aromaticivorans_UI_Synar_SAI2	2509601044
NODE_4538_length_8703_cov_40.658279	8787	3591585	268	16	17	7	Syntrophorhabdus_aromaticivorans_UI_Synar_SAI2	2509601044
NODE_4539_length_47866_cov_40.372562	47950	3591585	268	16	17	7	Syntrophorhabdus_aromaticivorans_UI_Synar_SAI2	2509601044
NODE_4540_length_38986_cov_40.216797	39070	3591585	268	16	17	7	Syntrophorhabdus_aromaticivorans_UI_Synar_SAI2	2509601044
NODE_4541_length_35320_cov_40.328171	35404	3591585	268	16	17	7	Syntrophorhabdus_aromaticivorans_UI_Synar_SAI2	2509601044
NODE_4542_length_9932_cov_40.420860	10016	3591585	268	16	17	7	Syntrophorhabdus_aromaticivorans_UI_Synar_SAI2	2509601044
NODE_4543_length_68275_cov_40.774895	68359	3591585	268	16	17	7	Syntrophorhabdus_aromaticivorans_UI_Synar_SAI2	2509601044
NODE_4544_length_24579_cov_40.422920	24663	3591585	268	16	17	7	Syntrophorhabdus_aromaticivorans_UI_Synar_SAI2	2509601044
NODE_4545_length_20712_cov_40.430042	20796	3591585	268	16	17	7	Syntrophorhabdus_aromaticivorans_UI_Synar_SAI2	2509601044
NODE_4547_length_10248_cov_40.782200	10332	3591585	268	16	0	7	Syntrophorhabdus_aromaticivorans_UI_Synar_SAI2	2509601044
NODE_4548_length_41059_cov_40.560097	41143	3591585	268	16	0	7	Syntrophorhabdus_aromaticivorans_UI_Synar_SAI2	2509601044
NODE_4550_length_970_cov_81.205154	1054	3591585	268	16	0	7	Syntrophorhabdus_aromaticivorans_UI_Synar_SAI2	2509601044
NODE_4551_length_42018_cov_40.176899	42102	3591585	268	16	17	7	Syntrophorhabdus_aromaticivorans_UI_Synar_SAI2	2509601044
NODE_4553_length_731_cov_41.419971	815	3591585	268	16	0	7	Syntrophorhabdus_aromaticivorans_UI_Synar_SAI2	2509601044
NODE_4554_length_23189_cov_40.307343	23273	3591585	268	16	0	7	Syntrophorhabdus_aromaticivorans_UI_Synar_SAI2	2509601044
NODE_4555_length_3231_cov_40.853294	3315	3591585	268	16	34	7	Syntrophorhabdus_aromaticivorans_UI_Synar_SAI2	2509601044
NODE_4556_length_45497_cov_40.432423	45581	3591585	268	16	17	7	Syntrophorhabdus_aromaticivorans_UI_Synar_SAI2	2509601044
NODE_4557_length_70676_cov_40.347588	70760	3591585	268	16	17	7	Syntrophorhabdus_aromaticivorans_UI_Synar_SAI2	2509601044
NODE_4558_length_27580_cov_40.259933	27664	3591585	268	16	0	7	Syntrophorhabdus_aromaticivorans_UI_Synar_SAI2	2509601044
NODE_4559_length_13033_cov_40.458912	13117	3591585	268	16	34	7	Syntrophorhabdus_aromaticivorans_UI_Synar_SAI2	2509601044
NODE_4560_length_28613_cov_39.861496	28697	3591585	268	16	17	7	Syntrophorhabdus_aromaticivorans_UI_Synar_SAI2	2509601044
NODE_4561_length_29413_cov_40.111958	29497	3591585	268	16	0	7	Syntrophorhabdus_aromaticivorans_UI_Synar_SAI2	2509601044
NODE_4562_length_71979_cov_40.410007	72063	3591585	268	16	17	7	Syntrophorhabdus_aromaticivorans_UI_Synar_SAI2	2509601044
NODE_4563_length_34415_cov_40.099724	34499	3591585	268	16	17	7	Syntrophorhabdus_aromaticivorans_UI_Synar_SAI2	2509601044
NODE_4564_length_17715_cov_40.639908	17799	3591585	268	16	17	7	Syntrophorhabdus_aromaticivorans_UI_Synar_SAI2	2509601044
NODE_4567_length_832_cov_78.340141	916	3591585	268	16	0	7	Syntrophorhabdus_aromaticivorans_UI_Synar_SAI2	2509601044
NODE_4570_length_6334_cov_41.104671	6418	3591585	268	16	34	7	Syntrophorhabdus_aromaticivorans_UI_Synar_SAI2	2509601044
NODE_4571_length_23331_cov_40.837982	23415	3591585	268	16	17	7	Syntrophorhabdus_aromaticivorans_UI_Synar_SAI2	2509601044
NODE_4572_length_24085_cov_40.089642	24169	3591585	268	16	17	7	Syntrophorhabdus_aromaticivorans_UI_Synar_SAI2	2509601044
NODE_4573_length_45335_cov_40.224728	45419	3591585	268	16	17	7	Syntrophorhabdus_aromaticivorans_UI_Synar_SAI2	2509601044
NODE_4574_length_30553_cov_40.537754	30637	3591585	268	16	0	7	Syntrophorhabdus_aromaticivorans_UI_Synar_SAI2	2509601044
NODE_4575_length_15209_cov_40.647907	15293	3591585	268	16	17	7	Syntrophorhabdus_aromaticivorans_UI_Synar_SAI2	2509601044
NODE_4576_length_47310_cov_40.497929	47394	3591585	268	16	34	7	Syntrophorhabdus_aromaticivorans_UI_Synar_SAI2	2509601044
NODE_4577_length_13592_cov_40.398911	13676	3591585	268	16	17	7	Syntrophorhabdus_aromaticivorans_UI_Synar_SAI2	2509601044
NODE_4578_length_776_cov_83.201035	860	3591585	268	16	0	7	Syntrophorhabdus_aromaticivorans_UI_Synar_SAI2	2509601044
NODE_4579_length_20133_cov_40.603737	20217	3591585	268	16	17	7	Syntrophorhabdus_aromaticivorans_UI_Synar_SAI2	2509601044
NODE_4580_length_30983_cov_40.194042	31067	3591585	268	16	17	7	Syntrophorhabdus_aromaticivorans_UI_Synar_SAI2	2509601044
NODE_4581_length_20220_cov_40.728931	20304	3591585	268	16	17	7	Syntrophorhabdus_aromaticivorans_UI_Synar_SAI2	2509601044
NODE_4582_length_8058_cov_40.619137	8142	3591585	268	16	0	7	Syntrophorhabdus_aromaticivorans_UI_Synar_SAI2	2509601044
NODE_4583_length_16586_cov_40.425358	16670	3591585	268	16	17	7	Syntrophorhabdus_aromaticivorans_UI_Synar_SAI2	2509601044
NODE_4584_length_9200_cov_39.965652	9284	3591585	268	16	17	7	Syntrophorhabdus_aromaticivorans_UI_Synar_SAI2	2509601044
NODE_4585_length_7285_cov_39.885242	7369	3591585	268	16	17	7	Syntrophorhabdus_aromaticivorans_UI_Synar_SAI2	2509601044
NODE_4586_length_9608_cov_40.149460	9692	3591585	268	16	0	7	Syntrophorhabdus_aromaticivorans_UI_Synar_SAI2	2509601044
NODE_4587_length_468_cov_78.202988	552	3591585	268	16	0	7	Syntrophorhabdus_aromaticivorans_UI_Synar_SAI2	2509601044
NODE_4588_length_19524_cov_40.671738	19608	3591585	268	16	17	7	Syntrophorhabdus_aromaticivorans_UI_Synar_SAI2	2509601044
NODE_4592_length_27390_cov_40.602081	27474	3591585	268	16	17	7	Syntrophorhabdus_aromaticivorans_UI_Synar_SAI2	2509601044
NODE_4593_length_14619_cov_40.467678	14703	3591585	268	16	17	7	Syntrophorhabdus_aromaticivorans_UI_Synar_SAI2	2509601044
NODE_4594_length_21615_cov_40.805088	21699	3591585	268	16	17	7	Syntrophorhabdus_aromaticivorans_UI_Synar_SAI2	2509601044
NODE_4598_length_15471_cov_40.378193	15555	3591585	268	16	0	7	Syntrophorhabdus_aromaticivorans_UI_Synar_SAI2	2509601044
NODE_4600_length_7490_cov_39.907745	7574	3591585	268	16	17	7	Syntrophorhabdus_aromaticivorans_UI_Synar_SAI2	2509601044
NODE_4601_length_822_cov_36.566910	906	3591585	268	16	0	7	Syntrophorhabdus_aromaticivorans_UI_Synar_SAI2	2509601044
NODE_4602_length_22066_cov_40.107494	22150	3591585	268	16	17	7	Syntrophorhabdus_aromaticivorans_UI_Synar_SAI2	2509601044
NODE_4603_length_1566_cov_41.057472	1650	3591585	268	16	0	7	Syntrophorhabdus_aromaticivorans_UI_Synar_SAI2	2509601044
NODE_4604_length_18022_cov_40.327488	18106	3591585	268	16	17	7	Syntrophorhabdus_aromaticivorans_UI_Synar_SAI2	2509601044
NODE_4605_length_15675_cov_40.207211	15759	3591585	268	16	17	7	Syntrophorhabdus_aromaticivorans_UI_Synar_SAI2	2509601044
NODE_4607_length_824_cov_40.298542	908	3591585	268	16	0	7	Syntrophorhabdus_aromaticivorans_UI_Synar_SAI2	2509601044
NODE_4608_length_22359_cov_40.622704	22443	3591585	268	16	17	7	Syntrophorhabdus_aromaticivorans_UI_Synar_SAI2	2509601044
NODE_4610_length_10618_cov_40.084103	10702	3591585	268	16	17	7	Syntrophorhabdus_aromaticivorans_UI_Synar_SAI2	2509601044
NODE_4611_length_7787_cov_40.843456	7871	3591585	268	16	17	7	Syntrophorhabdus_aromaticivorans_UI_Synar_SAI2	2509601044
NODE_4612_length_1314_cov_80.166664	1398	3591585	268	16	0	7	Syntrophorhabdus_aromaticivorans_UI_Synar_SAI2	2509601044
NODE_4614_length_21527_cov_40.758999	21611	3591585	268	16	34	7	Syntrophorhabdus_aromaticivorans_UI_Synar_SAI2	2509601044
NODE_4615_length_7217_cov_40.939724	7301	3591585	268	16	17	7	Syntrophorhabdus_aromaticivorans_UI_Synar_SAI2	2509601044
NODE_4617_length_535_cov_40.850468	619	3591585	268	16	0	7	Syntrophorhabdus_aromaticivorans_UI_Synar_SAI2	2509601044
NODE_4619_length_25957_cov_40.137844	26041	3591585	268	16	17	7	Syntrophorhabdus_aromaticivorans_UI_Synar_SAI2	2509601044
NODE_4620_length_26632_cov_40.536083	26716	3591585	268	16	0	7	Syntrophorhabdus_aromaticivorans_UI_Synar_SAI2	2509601044
NODE_4621_length_35569_cov_40.050522	35653	3591585	268	16	17	7	Syntrophorhabdus_aromaticivorans_UI_Synar_SAI2	2509601044
NODE_4623_length_975_cov_82.367180	1059	3591585	268	16	0	7	Syntrophorhabdus_aromaticivorans_UI_Synar_SAI2	2509601044
NODE_4625_length_42577_cov_40.358528	42661	3591585	268	16	17	7	Syntrophorhabdus_aromaticivorans_UI_Synar_SAI2	2509601044
NODE_4626_length_20516_cov_40.211250	20600	3591585	268	16	17	7	Syntrophorhabdus_aromaticivorans_UI_Synar_SAI2	2509601044
NODE_4627_length_15129_cov_39.643532	15213	3591585	268	16	17	7	Syntrophorhabdus_aromaticivorans_UI_Synar_SAI2	2509601044
NODE_4628_length_7738_cov_39.602482	7822	3591585	268	16	17	7	Syntrophorhabdus_aromaticivorans_UI_Synar_SAI2	2509601044
NODE_4630_length_1449_cov_39.856453	1533	3591585	268	16	0	7	Syntrophorhabdus_aromaticivorans_UI_Synar_SAI2	2509601044
NODE_4631_length_9808_cov_40.634174	9892	3591585	268	16	34	7	Syntrophorhabdus_aromaticivorans_UI_Synar_SAI2	2509601044
NODE_4635_length_8472_cov_40.517704	8556	3591585	268	16	17	7	Syntrophorhabdus_aromaticivorans_UI_Synar_SAI2	2509601044
NODE_4636_length_1911_cov_40.518055	1995	3591585	268	16	0	7	Syntrophorhabdus_aromaticivorans_UI_Synar_SAI2	2509601044
NODE_4648_length_561_cov_38.903744	645	3591585	268	16	0	7	Syntrophorhabdus_aromaticivorans_UI_Synar_SAI2	2509601044
NODE_4649_length_4789_cov_39.925663	4873	3591585	268	16	17	7	Syntrophorhabdus_aromaticivorans_UI_Synar_SAI2	2509601044
NODE_4650_length_1430_cov_42.000698	1514	3591585	268	16	0	7	Syntrophorhabdus_aromaticivorans_UI_Synar_SAI2	2509601044
NODE_4651_length_15541_cov_40.186668	15625	3591585	268	16	17	7	Syntrophorhabdus_aromaticivorans_UI_Synar_SAI2	2509601044
NODE_4652_length_2303_cov_40.187580	2387	3591585	268	16	17	7	Syntrophorhabdus_aromaticivorans_UI_Synar_SAI2	2509601044
NODE_4653_length_568_cov_40.000000	652	3591585	268	16	0	0	Syntrophorhabdus_aromaticivorans_UI_Synar_SAI2	2509601044
NODE_4654_length_3749_cov_39.196854	3833	3591585	268	16	34	7	Syntrophorhabdus_aromaticivorans_UI_Synar_SAI2	2509601044
NODE_4656_length_5662_cov_41.020489	5746	3591585	268	16	17	7	Syntrophorhabdus_aromaticivorans_UI_Synar_SAI2	2509601044
NODE_4657_length_458_cov_41.572052	542	3591585	268	16	0	7	Syntrophorhabdus_aromaticivorans_UI_Synar_SAI2	2509601044
NODE_4658_length_10765_cov_40.347237	10849	3591585	268	16	0	7	Syntrophorhabdus_aromaticivorans_UI_Synar_SAI2	2509601044
NODE_4659_length_4582_cov_40.222393	4666	3591585	268	16	17	7	Syntrophorhabdus_aromaticivorans_UI_Synar_SAI2	2509601044
NODE_4660_length_1789_cov_41.055897	1873	3591585	268	16	0	7	Syntrophorhabdus_aromaticivorans_UI_Synar_SAI2	2509601044
NODE_4661_length_30039_cov_40.501183	30123	3591585	268	16	0	7	Syntrophorhabdus_aromaticivorans_UI_Synar_SAI2	2509601044
NODE_4662_length_14225_cov_40.124851	14309	3591585	268	16	17	7	Syntrophorhabdus_aromaticivorans_UI_Synar_SAI2	2509601044
NODE_4664_length_17664_cov_40.330788	17748	3591585	268	16	17	7	Syntrophorhabdus_aromaticivorans_UI_Synar_SAI2	2509601044
NODE_4665_length_9086_cov_39.770855	9170	3591585	268	16	0	7	Syntrophorhabdus_aromaticivorans_UI_Synar_SAI2	2509601044
NODE_4668_length_3355_cov_40.761848	3439	3591585	268	16	17	7	Syntrophorhabdus_aromaticivorans_UI_Synar_SAI2	2509601044
NODE_4669_length_10604_cov_40.531403	10688	3591585	268	16	34	7	Syntrophorhabdus_aromaticivorans_UI_Synar_SAI2	2509601044
NODE_4671_length_21140_cov_40.087749	21224	3591585	268	16	0	7	Syntrophorhabdus_aromaticivorans_UI_Synar_SAI2	2509601044
NODE_4672_length_3090_cov_40.016827	3174	3591585	268	16	17	7	Syntrophorhabdus_aromaticivorans_UI_Synar_SAI2	2509601044
NODE_4673_length_883_cov_40.266140	967	3591585	268	16	0	7	Syntrophorhabdus_aromaticivorans_UI_Synar_SAI2	2509601044
NODE_4674_length_11688_cov_40.566990	11772	3591585	268	16	17	7	Syntrophorhabdus_aromaticivorans_UI_Synar_SAI2	2509601044
NODE_4675_length_6541_cov_39.714874	6625	3591585	268	16	17	7	Syntrophorhabdus_aromaticivorans_UI_Synar_SAI2	2509601044
NODE_4677_length_6515_cov_40.055412	6599	3591585	268	16	41	7	Syntrophorhabdus_aromaticivorans_UI_Synar_SAI2	2509601044
NODE_4682_length_19027_cov_40.626949	19111	3591585	268	16	0	7	Syntrophorhabdus_aromaticivorans_UI_Synar_SAI2	2509601044
NODE_4683_length_10151_cov_39.580040	10235	3591585	268	16	17	7	Syntrophorhabdus_aromaticivorans_UI_Synar_SAI2	2509601044
NODE_4684_length_1733_cov_40.173111	1817	3591585	268	16	0	7	Syntrophorhabdus_aromaticivorans_UI_Synar_SAI2	2509601044
NODE_4685_length_13264_cov_40.563782	13348	3591585	268	16	17	7	Syntrophorhabdus_aromaticivorans_UI_Synar_SAI2	2509601044
NODE_4686_length_6282_cov_41.279530	6366	3591585	268	16	17	7	Syntrophorhabdus_aromaticivorans_UI_Synar_SAI2	2509601044
NODE_4687_length_2002_cov_40.327171	2086	3591585	268	16	17	7	Syntrophorhabdus_aromaticivorans_UI_Synar_SAI2	2509601044
NODE_4688_length_13265_cov_41.056313	13349	3591585	268	16	0	7	Syntrophorhabdus_aromaticivorans_UI_Synar_SAI2	2509601044
NODE_4693_length_3383_cov_39.930832	3467	3591585	268	16	41	7	Syntrophorhabdus_aromaticivorans_UI_Synar_SAI2	2509601044
NODE_4696_length_1580_cov_40.774685	1664	3591585	268	16	0	7	Syntrophorhabdus_aromaticivorans_UI_Synar_SAI2	2509601044
NODE_4697_length_790_cov_42.226582	874	3591585	268	16	0	7	Syntrophorhabdus_aromaticivorans_UI_Synar_SAI2	2509601044
NODE_4698_length_15151_cov_40.446705	15235	3591585	268	16	17	7	Syntrophorhabdus_aromaticivorans_UI_Synar_SAI2	2509601044
NODE_4699_length_1045_cov_80.677513	1129	3591585	268	16	0	7	Syntrophorhabdus_aromaticivorans_UI_Synar_SAI2	2509601044
NODE_4700_length_10397_cov_40.563145	10481	3591585	268	16	17	7	Syntrophorhabdus_aromaticivorans_UI_Synar_SAI2	2509601044
NODE_4703_length_4020_cov_40.328110	4104	3591585	268	16	34	7	Syntrophorhabdus_aromaticivorans_UI_Synar_SAI2	2509601044
NODE_4705_length_605_cov_117.813225	689	3591585	268	16	0	0	Syntrophorhabdus_aromaticivorans_UI_Synar_SAI2	2509601044
NODE_4710_length_1567_cov_81.308868	1651	3591585	268	16	0	7	Syntrophorhabdus_aromaticivorans_UI_Synar_SAI2	2509601044
NODE_4712_length_533_cov_79.712944	617	3591585	268	16	0	7	Syntrophorhabdus_aromaticivorans_UI_Synar_SAI2	2509601044
NODE_4713_length_2309_cov_41.068859	2393	3591585	268	16	34	7	Syntrophorhabdus_aromaticivorans_UI_Synar_SAI2	2509601044
NODE_4714_length_7146_cov_40.302547	7230	3591585	268	16	0	7	Syntrophorhabdus_aromaticivorans_UI_Synar_SAI2	2509601044
NODE_4717_length_1748_cov_82.998856	1832	3591585	268	16	0	7	Syntrophorhabdus_aromaticivorans_UI_Synar_SAI2	2509601044
NODE_4718_length_438_cov_39.296803	522	3591585	268	16	0	7	Syntrophorhabdus_aromaticivorans_UI_Synar_SAI2	2509601044
NODE_4720_length_4767_cov_40.021816	4851	3591585	268	16	17	7	Syntrophorhabdus_aromaticivorans_UI_Synar_SAI2	2509601044
NODE_4721_length_565_cov_39.911503	649	3591585	268	16	0	7	Syntrophorhabdus_aromaticivorans_UI_Synar_SAI2	2509601044
NODE_4725_length_458_cov_41.737991	542	3591585	268	16	0	7	Syntrophorhabdus_aromaticivorans_UI_Synar_SAI2	2509601044
NODE_4727_length_12605_cov_40.695518	12689	3591585	268	16	0	7	Syntrophorhabdus_aromaticivorans_UI_Synar_SAI2	2509601044
NODE_4728_length_6320_cov_40.933544	6404	3591585	268	16	17	7	Syntrophorhabdus_aromaticivorans_UI_Synar_SAI2	2509601044
NODE_4730_length_4224_cov_40.063919	4308	3591585	268	16	0	7	Syntrophorhabdus_aromaticivorans_UI_Synar_SAI2	2509601044
NODE_4731_length_15395_cov_40.462944	15479	3591585	268	16	17	7	Syntrophorhabdus_aromaticivorans_UI_Synar_SAI2	2509601044
NODE_4735_length_1569_cov_78.790314	1653	3591585	268	16	0	7	Syntrophorhabdus_aromaticivorans_UI_Synar_SAI2	2509601044
NODE_4738_length_635_cov_40.181103	719	3591585	268	16	0	0	Syntrophorhabdus_aromaticivorans_UI_Synar_SAI2	2509601044
NODE_4739_length_515_cov_160.366989	599	3591585	268	16	0	0	Syntrophorhabdus_aromaticivorans_UI_Synar_SAI2	2509601044
NODE_4741_length_931_cov_42.689583	1015	3591585	268	16	0	7	Syntrophorhabdus_aromaticivorans_UI_Synar_SAI2	2509601044
NODE_4742_length_2386_cov_39.376362	2470	3591585	268	16	0	7	Syntrophorhabdus_aromaticivorans_UI_Synar_SAI2	2509601044
NODE_4750_length_6728_cov_41.385551	6812	3591585	268	16	17	7	Syntrophorhabdus_aromaticivorans_UI_Synar_SAI2	2509601044
NODE_4759_length_12771_cov_40.695637	12855	3591585	268	16	17	7	Syntrophorhabdus_aromaticivorans_UI_Synar_SAI2	2509601044
NODE_4760_length_3988_cov_40.402958	4072	3591585	268	16	0	7	Syntrophorhabdus_aromaticivorans_UI_Synar_SAI2	2509601044
NODE_4761_length_9038_cov_40.220402	9122	3591585	268	16	17	7	Syntrophorhabdus_aromaticivorans_UI_Synar_SAI2	2509601044
NODE_4765_length_1683_cov_81.000595	1767	3591585	268	16	0	7	Syntrophorhabdus_aromaticivorans_UI_Synar_SAI2	2509601044
NODE_4766_length_1592_cov_82.564072	1676	3591585	268	16	0	7	Syntrophorhabdus_aromaticivorans_UI_Synar_SAI2	2509601044
NODE_4768_length_8975_cov_40.118553	9059	3591585	268	16	17	7	Syntrophorhabdus_aromaticivorans_UI_Synar_SAI2	2509601044
NODE_4769_length_546_cov_81.741760	630	3591585	268	16	0	7	Syntrophorhabdus_aromaticivorans_UI_Synar_SAI2	2509601044
NODE_4770_length_536_cov_81.143654	620	3591585	268	16	0	7	Syntrophorhabdus_aromaticivorans_UI_Synar_SAI2	2509601044
NODE_4776_length_8998_cov_40.493553	9082	3591585	268	16	17	7	Syntrophorhabdus_aromaticivorans_UI_Synar_SAI2	2509601044
NODE_4777_length_12611_cov_40.637222	12695	3591585	268	16	0	7	Syntrophorhabdus_aromaticivorans_UI_Synar_SAI2	2509601044
NODE_4779_length_4343_cov_40.360119	4427	3591585	268	16	34	7	Syntrophorhabdus_aromaticivorans_UI_Synar_SAI2	2509601044
NODE_4781_length_1130_cov_40.038052	1214	3591585	268	16	0	7	Syntrophorhabdus_aromaticivorans_UI_Synar_SAI2	2509601044
NODE_4785_length_5706_cov_40.851910	5790	3591585	268	16	17	7	Syntrophorhabdus_aromaticivorans_UI_Synar_SAI2	2509601044
NODE_4787_length_2513_cov_39.532032	2597	3591585	268	16	18	7	Syntrophorhabdus_aromaticivorans_UI_Synar_SAI2	2509601044
NODE_4788_length_545_cov_39.315598	629	3591585	268	16	0	7	Syntrophorhabdus_aromaticivorans_UI_Synar_SAI2	2509601044
NODE_4792_length_3113_cov_39.876968	3197	3591585	268	16	17	7	Syntrophorhabdus_aromaticivorans_UI_Synar_SAI2	2509601044
NODE_4796_length_3091_cov_40.352959	3175	3591585	268	16	34	7	Syntrophorhabdus_aromaticivorans_UI_Synar_SAI2	2509601044
NODE_4803_length_10475_cov_41.026634	10559	3591585	268	16	0	7	Syntrophorhabdus_aromaticivorans_UI_Synar_SAI2	2509601044
NODE_4815_length_989_cov_42.280083	1073	3591585	268	16	0	7	Syntrophorhabdus_aromaticivorans_UI_Synar_SAI2	2509601044
NODE_4818_length_774_cov_40.196381	858	3591585	268	16	0	7	Syntrophorhabdus_aromaticivorans_UI_Synar_SAI2	2509601044
NODE_4821_length_881_cov_41.746880	965	3591585	268	16	0	7	Syntrophorhabdus_aromaticivorans_UI_Synar_SAI2	2509601044
NODE_4831_length_2076_cov_39.322254	2160	3591585	268	16	0	7	Syntrophorhabdus_aromaticivorans_UI_Synar_SAI2	2509601044
NODE_4838_length_949_cov_40.578503	1033	3591585	268	16	0	7	Syntrophorhabdus_aromaticivorans_UI_Synar_SAI2	2509601044
NODE_4852_length_535_cov_39.560749	619	3591585	268	16	0	7	Syntrophorhabdus_aromaticivorans_UI_Synar_SAI2	2509601044
NODE_4853_length_638_cov_41.255486	722	3591585	268	16	0	0	Syntrophorhabdus_aromaticivorans_UI_Synar_SAI2	2509601044
NODE_4854_length_1928_cov_39.481327	2012	3591585	268	16	0	7	Syntrophorhabdus_aromaticivorans_UI_Synar_SAI2	2509601044
NODE_4856_length_1017_cov_41.527039	1101	3591585	268	16	0	7	Syntrophorhabdus_aromaticivorans_UI_Synar_SAI2	2509601044
NODE_4857_length_542_cov_40.426201	626	3591585	268	16	0	7	Syntrophorhabdus_aromaticivorans_UI_Synar_SAI2	2509601044
NODE_4867_length_3821_cov_40.378433	3905	3591585	268	16	17	7	Syntrophorhabdus_aromaticivorans_UI_Synar_SAI2	2509601044
NODE_4870_length_821_cov_40.059685	905	3591585	268	16	0	7	Syntrophorhabdus_aromaticivorans_UI_Synar_SAI2	2509601044
NODE_4876_length_813_cov_40.399754	897	3591585	268	16	0	7	Syntrophorhabdus_aromaticivorans_UI_Synar_SAI2	2509601044
NODE_4883_length_2520_cov_40.777779	2604	3591585	268	16	17	7	Syntrophorhabdus_aromaticivorans_UI_Synar_SAI2	2509601044
NODE_4885_length_1048_cov_39.291031	1132	3591585	268	16	0	7	Syntrophorhabdus_aromaticivorans_UI_Synar_SAI2	2509601044
NODE_4891_length_536_cov_40.582088	620	3591585	268	16	0	7	Syntrophorhabdus_aromaticivorans_UI_Synar_SAI2	2509601044
NODE_4894_length_828_cov_40.376812	912	3591585	268	16	0	7	Syntrophorhabdus_aromaticivorans_UI_Synar_SAI2	2509601044
NODE_4900_length_3876_cov_40.372032	3960	3591585	268	16	34	7	Syntrophorhabdus_aromaticivorans_UI_Synar_SAI2	2509601044
NODE_4906_length_1203_cov_41.743141	1287	3591585	268	16	0	0	Syntrophorhabdus_aromaticivorans_UI_Synar_SAI2	2509601044
NODE_4908_length_3677_cov_39.528965	3761	3591585	268	16	17	7	Syntrophorhabdus_aromaticivorans_UI_Synar_SAI2	2509601044
NODE_4910_length_1259_cov_42.471802	1343	3591585	268	16	0	7	Syntrophorhabdus_aromaticivorans_UI_Synar_SAI2	2509601044
NODE_4915_length_463_cov_81.587471	547	3591585	268	16	0	0	Syntrophorhabdus_aromaticivorans_UI_Synar_SAI1	2509601044
NODE_4916_length_1021_cov_40.582764	1105	3591585	268	16	0	7	Syntrophorhabdus_aromaticivorans_UI_Synar_SAI2	2509601044
NODE_4917_length_459_cov_42.610023	543	3591585	268	16	0	7	Syntrophorhabdus_aromaticivorans_UI_Synar_SAI2	2509601044
NODE_4957_length_688_cov_84.348839	772	3591585	268	16	0	7	Syntrophorhabdus_aromaticivorans_UI_Synar_SAI2	2509601044
NODE_4964_length_562_cov_40.096085	646	3591585	268	16	0	7	Syntrophorhabdus_aromaticivorans_UI_Synar_SAI2	2509601044
NODE_4969_length_419_cov_40.809071	503	3591585	268	16	0	7	Syntrophorhabdus_aromaticivorans_UI_Synar_SAI2	2509601044
NODE_4970_length_447_cov_40.633110	531	3591585	268	16	0	7	Syntrophorhabdus_aromaticivorans_UI_Synar_SAI2	2509601044
NODE_4980_length_1638_cov_39.902931	1722	3591585	268	16	0	7	Syntrophorhabdus_aromaticivorans_UI_Synar_SAI2	2509601044
NODE_4987_length_544_cov_80.001839	628	3591585	268	16	0	7	Syntrophorhabdus_aromaticivorans_UI_Synar_SAI2	2509601044
NODE_5001_length_1214_cov_41.776772	1298	3591585	268	16	0	7	Syntrophorhabdus_aromaticivorans_UI_Synar_SAI2	2509601044
NODE_5005_length_515_cov_82.450485	599	3591585	268	16	0	7	Syntrophorhabdus_aromaticivorans_UI_Synar_SAI2	2509601044
NODE_5027_length_1017_cov_40.291054	1101	3591585	268	16	0	7	Syntrophorhabdus_aromaticivorans_UI_Synar_SAI2	2509601044
NODE_5029_length_445_cov_40.849438	529	3591585	268	16	0	7	Syntrophorhabdus_aromaticivorans_UI_Synar_SAI2	2509601044
NODE_5035_length_548_cov_81.589417	632	3591585	268	16	0	0	Syntrophorhabdus_aromaticivorans_UI_Synar_SAI2	2509601044
NODE_5036_length_609_cov_40.426929	693	3591585	268	16	0	7	Syntrophorhabdus_aromaticivorans_UI_Synar_SAI2	2509601044
NODE_5068_length_503_cov_83.421471	587	3591585	268	16	0	7	Syntrophorhabdus_aromaticivorans_UI_Synar_SAI2	2509601044
NODE_5182_length_601_cov_40.347755	685	3591585	268	16	0	7	Syntrophorhabdus_aromaticivorans_UI_Synar_SAI2	2509601044
NODE_5211_length_802_cov_80.327927	886	3591585	268	16	0	0	Syntrophorhabdus_aromaticivorans_UI_Synar_SAI2	2509601044
NODE_5652_length_47357_cov_40.642441	47441	3591585	268	16	17	7	Syntrophorhabdus_aromaticivorans_UI_Synar_SAI3	2509601044
NODE_5653_length_18767_cov_40.466618	18851	3591585	268	16	17	7	Syntrophorhabdus_aromaticivorans_UI_Synar_SAI3	2509601044
NODE_5654_length_70724_cov_40.255161	70808	3591585	268	16	17	7	Syntrophorhabdus_aromaticivorans_UI_Synar_SAI3	2509601044
NODE_5655_length_2330_cov_40.052792	2414	3591585	268	16	0	7	Syntrophorhabdus_aromaticivorans_UI_Synar_SAI3	2509601044
NODE_5656_length_49746_cov_40.592770	49830	3591585	268	16	17	7	Syntrophorhabdus_aromaticivorans_UI_Synar_SAI3	2509601044
NODE_5657_length_20716_cov_40.159779	20800	3591585	268	16	17	7	Syntrophorhabdus_aromaticivorans_UI_Synar_SAI3	2509601044
NODE_5658_length_2424_cov_41.596535	2508	3591585	268	16	17	7	Syntrophorhabdus_aromaticivorans_UI_Synar_SAI3	2509601044
NODE_5661_length_2801_cov_41.686897	2885	3591585	268	16	41	7	Syntrophorhabdus_aromaticivorans_UI_Synar_SAI3	2509601044
NODE_5662_length_1580_cov_40.988609	1664	3591585	268	16	0	7	Syntrophorhabdus_aromaticivorans_UI_Synar_SAI3	2509601044
NODE_5666_length_1424_cov_40.353931	1508	3591585	268	16	0	7	Syntrophorhabdus_aromaticivorans_UI_Synar_SAI3	2509601044
NODE_5692_length_10821_cov_39.917381	10905	3591585	268	16	0	7	Syntrophorhabdus_aromaticivorans_UI_Synar_SAI1	2509601044
NODE_5693_length_24294_cov_40.405491	24378	3591585	268	16	0	7	Syntrophorhabdus_aromaticivorans_UI_Synar_SAI1	2509601044
NODE_5694_length_69357_cov_40.174316	69441	3591585	268	16	0	7	Syntrophorhabdus_aromaticivorans_UI_Synar_SAI1	2509601044
NODE_5695_length_14927_cov_40.279427	15011	3591585	268	16	17	7	Syntrophorhabdus_aromaticivorans_UI_Synar_SAI1	2509601044
NODE_5696_length_42376_cov_40.822918	42460	3591585	268	16	17	7	Syntrophorhabdus_aromaticivorans_UI_Synar_SAI1	2509601044
NODE_5697_length_14395_cov_40.624802	14479	3591585	268	16	0	7	Syntrophorhabdus_aromaticivorans_UI_Synar_SAI1	2509601044
NODE_5698_length_27376_cov_40.441116	27460	3591585	268	16	17	7	Syntrophorhabdus_aromaticivorans_UI_Synar_SAI1	2509601044
NODE_5699_length_565_cov_79.603539	649	3591585	268	16	0	0	Syntrophorhabdus_aromaticivorans_UI_Synar_SAI1	2509601044
NODE_5700_length_8463_cov_41.062153	8547	3591585	268	16	0	7	Syntrophorhabdus_aromaticivorans_UI_Synar_SAI1	2509601044
NODE_5701_length_23110_cov_39.959930	23194	3591585	268	16	17	7	Syntrophorhabdus_aromaticivorans_UI_Synar_SAI1	2509601044
NODE_5702_length_18371_cov_40.813564	18455	3591585	268	16	38	7	Syntrophorhabdus_aromaticivorans_UI_Synar_SAI1	2509601044
NODE_5703_length_1587_cov_80.377441	1671	3591585	268	16	0	7	Syntrophorhabdus_aromaticivorans_UI_Synar_SAI1	2509601044
NODE_5704_length_1618_cov_41.451794	1702	3591585	268	16	0	7	Syntrophorhabdus_aromaticivorans_UI_Synar_SAI1	2509601044
NODE_5705_length_7801_cov_40.322140	7885	3591585	268	16	17	7	Syntrophorhabdus_aromaticivorans_UI_Synar_SAI1	2509601044
NODE_5707_length_12544_cov_40.482540	12628	3591585	268	16	17	7	Syntrophorhabdus_aromaticivorans_UI_Synar_SAI1	2509601044
NODE_5708_length_7848_cov_40.590595	7932	3591585	268	16	0	7	Syntrophorhabdus_aromaticivorans_UI_Synar_SAI1	2509601044
NODE_5709_length_3551_cov_41.000000	3635	3591585	268	16	38	7	Syntrophorhabdus_aromaticivorans_UI_Synar_SAI1	2509601044
NODE_5710_length_7279_cov_40.238083	7363	3591585	268	16	38	7	Syntrophorhabdus_aromaticivorans_UI_Synar_SAI1	2509601044
NODE_5711_length_3448_cov_40.950115	3532	3591585	268	16	17	7	Syntrophorhabdus_aromaticivorans_UI_Synar_SAI1	2509601044
NODE_5716_length_689_cov_118.708275	773	3591585	268	16	0	0	Syntrophorhabdus_aromaticivorans_UI_Synar_SAI1	2509601044
NODE_5718_length_1236_cov_39.932846	1320	3591585	268	16	0	7	Syntrophorhabdus_aromaticivorans_UI_Synar_SAI1	2509601044
NODE_5719_length_1915_cov_41.039688	1999	3591585	268	16	0	7	Syntrophorhabdus_aromaticivorans_UI_Synar_SAI1	2509601044
NODE_5720_length_10552_cov_41.187546	10636	3591585	268	16	44	7	Syntrophorhabdus_aromaticivorans_UI_Synar_SAI1	2509601044
NODE_5721_length_2944_cov_40.892323	3028	3591585	268	16	0	7	Syntrophorhabdus_aromaticivorans_UI_Synar_SAI1	2509601044
NODE_5725_length_2056_cov_39.773834	2140	3591585	268	16	0	7	Syntrophorhabdus_aromaticivorans_UI_Synar_SAI1	2509601044
NODE_5726_length_661_cov_40.872921	745	3591585	268	16	0	7	Syntrophorhabdus_aromaticivorans_UI_Synar_SAI1	2509601044
NODE_5727_length_2561_cov_38.969543	2645	3591585	268	16	0	7	Syntrophorhabdus_aromaticivorans_UI_Synar_SAI1	2509601044
NODE_5730_length_836_cov_40.594498	920	3591585	268	16	0	7	Syntrophorhabdus_aromaticivorans_UI_Synar_SAI1	2509601044
NODE_5732_length_542_cov_39.531364	626	3591585	268	16	0	7	Syntrophorhabdus_aromaticivorans_UI_Synar_SAI1	2509601044
NODE_5733_length_790_cov_41.113926	874	3591585	268	16	0	7	Syntrophorhabdus_aromaticivorans_UI_Synar_SAI1	2509601044
NODE_5734_length_895_cov_39.778770	979	3591585	268	16	0	7	Syntrophorhabdus_aromaticivorans_UI_Synar_SAI1	2509601044
NODE_5745_length_1587_cov_79.631378	1671	3591585	268	16	0	7	Syntrophorhabdus_aromaticivorans_UI_Synar_SAI1	2509601044
NODE_5747_length_838_cov_41.724342	922	3591585	268	16	0	7	Syntrophorhabdus_aromaticivorans_UI_Synar_SAI1	2509601044
NODE_5749_length_1245_cov_40.058636	1329	3591585	268	16	0	7	Syntrophorhabdus_aromaticivorans_UI_Synar_SAI1	2509601044
NODE_5753_length_418_cov_39.870815	502	3591585	268	16	0	7	Syntrophorhabdus_aromaticivorans_UI_Synar_SAI1	2509601044
NODE_5755_length_1014_cov_35.003944	1098	3591585	268	16	0	7	Syntrophorhabdus_aromaticivorans_UI_Synar_SAI1	2509601044
NODE_5846_length_492_cov_78.839432	576	3591585	268	16	0	7	Syntrophorhabdus_aromaticivorans_UI_Synar_SAI1	2509601044
NODE_12914_length_1006_cov_427.751495	1090	2408206	115	27	0	0	Leptotrichia_buccalis_DSM_1135	644736384
NODE_12937_length_474_cov_426.436707	558	2408206	115	27	0	0	Leptotrichia_buccalis_DSM_1135	644736384
NODE_12970_length_464_cov_257.372833	548	2408206	115	27	0	0	Leptotrichia_buccalis_DSM_1135	644736384
NODE_8304_length_52355_cov_85.801620	52439	2408206	115	27	8	4	Leptotrichia_buccalis_DSM_1135	644736384
NODE_8305_length_56970_cov_85.579407	57054	2408206	115	27	8	4	Leptotrichia_buccalis_DSM_1135	644736384
NODE_8306_length_32781_cov_85.883286	32865	2408206	115	27	8	4	Leptotrichia_buccalis_DSM_1135	644736384
NODE_8307_length_83664_cov_86.135399	83748	2408206	115	27	8	4	Leptotrichia_buccalis_DSM_1135	644736384
NODE_8308_length_82091_cov_85.914116	82175	2408206	115	27	8	4	Leptotrichia_buccalis_DSM_1135	644736384
NODE_8309_length_34841_cov_86.183235	34925	2408206	115	27	8	4	Leptotrichia_buccalis_DSM_1135	644736384
NODE_8310_length_94473_cov_85.639534	94557	2408206	115	27	8	4	Leptotrichia_buccalis_DSM_1135	644736384
NODE_8311_length_86123_cov_85.530113	86207	2408206	115	27	8	4	Leptotrichia_buccalis_DSM_1135	644736384
NODE_8312_length_15936_cov_86.175888	16020	2408206	115	27	8	4	Leptotrichia_buccalis_DSM_1135	644736384
NODE_8313_length_24312_cov_86.259583	24396	2408206	115	27	8	4	Leptotrichia_buccalis_DSM_1135	644736384
NODE_8314_length_12864_cov_86.027748	12948	2408206	115	27	8	4	Leptotrichia_buccalis_DSM_1135	644736384
NODE_8315_length_40218_cov_86.017975	40302	2408206	115	27	8	4	Leptotrichia_buccalis_DSM_1135	644736384
NODE_8316_length_56414_cov_86.069206	56498	2408206	115	27	8	4	Leptotrichia_buccalis_DSM_1135	644736384
NODE_8317_length_34494_cov_85.915779	34578	2408206	115	27	8	4	Leptotrichia_buccalis_DSM_1135	644736384
NODE_8318_length_40362_cov_85.676628	40446	2408206	115	27	8	4	Leptotrichia_buccalis_DSM_1135	644736384
NODE_8319_length_6633_cov_86.436302	6717	2408206	115	27	8	4	Leptotrichia_buccalis_DSM_1135	644736384
NODE_8320_length_38312_cov_85.700333	38396	2408206	115	27	8	4	Leptotrichia_buccalis_DSM_1135	644736384
NODE_8321_length_150861_cov_86.102356	150945	2408206	115	27	8	4	Leptotrichia_buccalis_DSM_1135	644736384
NODE_8322_length_9594_cov_86.333122	9678	2408206	115	27	0	4	Leptotrichia_buccalis_DSM_1135	644736384
NODE_8323_length_107447_cov_85.804779	107531	2408206	115	27	8	4	Leptotrichia_buccalis_DSM_1135	644736384
NODE_8324_length_48006_cov_85.588364	48090	2408206	115	27	8	4	Leptotrichia_buccalis_DSM_1135	644736384
NODE_8325_length_20971_cov_85.916359	21055	2408206	115	27	8	4	Leptotrichia_buccalis_DSM_1135	644736384
NODE_8326_length_17924_cov_86.190361	18008	2408206	115	27	8	4	Leptotrichia_buccalis_DSM_1135	644736384
NODE_8328_length_2718_cov_85.504417	2802	2408206	115	27	8	4	Leptotrichia_buccalis_DSM_1135	644736384
NODE_8329_length_50054_cov_85.650696	50138	2408206	115	27	8	4	Leptotrichia_buccalis_DSM_1135	644736384
NODE_8330_length_89844_cov_86.040581	89928	2408206	115	27	8	4	Leptotrichia_buccalis_DSM_1135	644736384
NODE_8331_length_20513_cov_85.492325	20597	2408206	115	27	8	4	Leptotrichia_buccalis_DSM_1135	644736384
NODE_8332_length_14756_cov_85.702087	14840	2408206	115	27	8	4	Leptotrichia_buccalis_DSM_1135	644736384
NODE_8333_length_17971_cov_86.201599	18055	2408206	115	27	0	4	Leptotrichia_buccalis_DSM_1135	644736384
NODE_8334_length_19881_cov_86.062721	19965	2408206	115	27	8	4	Leptotrichia_buccalis_DSM_1135	644736384
NODE_8335_length_31153_cov_85.676849	31237	2408206	115	27	8	4	Leptotrichia_buccalis_DSM_1135	644736384
NODE_8336_length_22291_cov_86.185455	22375	2408206	115	27	8	4	Leptotrichia_buccalis_DSM_1135	644736384
NODE_8337_length_102125_cov_85.774651	102209	2408206	115	27	8	4	Leptotrichia_buccalis_DSM_1135	644736384
NODE_8338_length_9331_cov_85.327835	9415	2408206	115	27	8	4	Leptotrichia_buccalis_DSM_1135	644736384
NODE_8339_length_6452_cov_87.016586	6536	2408206	115	27	0	4	Leptotrichia_buccalis_DSM_1135	644736384
NODE_8340_length_66383_cov_85.646233	66467	2408206	115	27	8	4	Leptotrichia_buccalis_DSM_1135	644736384
NODE_8341_length_25934_cov_85.593163	26018	2408206	115	27	8	4	Leptotrichia_buccalis_DSM_1135	644736384
NODE_8342_length_30324_cov_85.766685	30408	2408206	115	27	8	4	Leptotrichia_buccalis_DSM_1135	644736384
NODE_8343_length_36328_cov_85.445961	36412	2408206	115	27	8	4	Leptotrichia_buccalis_DSM_1135	644736384
NODE_8344_length_2210_cov_86.264709	2294	2408206	115	27	8	4	Leptotrichia_buccalis_DSM_1135	644736384
NODE_8345_length_26571_cov_86.618378	26655	2408206	115	27	8	4	Leptotrichia_buccalis_DSM_1135	644736384
NODE_8346_length_29097_cov_86.483139	29181	2408206	115	27	8	4	Leptotrichia_buccalis_DSM_1135	644736384
NODE_8347_length_10364_cov_86.449921	10448	2408206	115	27	8	4	Leptotrichia_buccalis_DSM_1135	644736384
NODE_8348_length_19407_cov_86.065025	19491	2408206	115	27	8	4	Leptotrichia_buccalis_DSM_1135	644736384
NODE_8349_length_9992_cov_83.644615	10076	2408206	115	27	8	4	Leptotrichia_buccalis_DSM_1135	644736384
NODE_8350_length_24341_cov_85.398544	24425	2408206	115	27	8	4	Leptotrichia_buccalis_DSM_1135	644736384
NODE_8351_length_67242_cov_85.906265	67326	2408206	115	27	8	4	Leptotrichia_buccalis_DSM_1135	644736384
NODE_8352_length_56857_cov_85.643791	56941	2408206	115	27	8	4	Leptotrichia_buccalis_DSM_1135	644736384
NODE_8353_length_7556_cov_85.560745	7640	2408206	115	27	0	4	Leptotrichia_buccalis_DSM_1135	644736384
NODE_8354_length_4510_cov_86.162971	4594	2408206	115	27	8	4	Leptotrichia_buccalis_DSM_1135	644736384
NODE_8355_length_52899_cov_86.301537	52983	2408206	115	27	8	4	Leptotrichia_buccalis_DSM_1135	644736384
NODE_8356_length_13997_cov_85.472031	14081	2408206	115	27	8	3	Leptotrichia_buccalis_DSM_1135	644736384
NODE_8357_length_18307_cov_85.714478	18391	2408206	115	27	8	4	Leptotrichia_buccalis_DSM_1135	644736384
NODE_8358_length_3714_cov_87.889336	3798	2408206	115	27	8	3	Leptotrichia_buccalis_DSM_1135	644736384
NODE_8359_length_1493_cov_86.500336	1577	2408206	115	27	0	3	Leptotrichia_buccalis_DSM_1135	644736384
NODE_8360_length_13012_cov_86.103523	13096	2408206	115	27	8	4	Leptotrichia_buccalis_DSM_1135	644736384
NODE_8361_length_49118_cov_86.425201	49202	2408206	115	27	8	4	Leptotrichia_buccalis_DSM_1135	644736384
NODE_8362_length_18329_cov_86.128487	18413	2408206	115	27	8	4	Leptotrichia_buccalis_DSM_1135	644736384
NODE_8363_length_16419_cov_85.993973	16503	2408206	115	27	8	4	Leptotrichia_buccalis_DSM_1135	644736384
NODE_8364_length_11353_cov_85.350922	11437	2408206	115	27	8	4	Leptotrichia_buccalis_DSM_1135	644736384
NODE_8365_length_18938_cov_85.833771	19022	2408206	115	27	8	4	Leptotrichia_buccalis_DSM_1135	644736384
NODE_8366_length_26219_cov_86.055954	26303	2408206	115	27	8	4	Leptotrichia_buccalis_DSM_1135	644736384
NODE_8367_length_6195_cov_86.080391	6279	2408206	115	27	8	4	Leptotrichia_buccalis_DSM_1135	644736384
NODE_8368_length_7090_cov_84.862625	7174	2408206	115	27	0	4	Leptotrichia_buccalis_DSM_1135	644736384
NODE_8369_length_17621_cov_85.745476	17705	2408206	115	27	8	4	Leptotrichia_buccalis_DSM_1135	644736384
NODE_8370_length_25445_cov_85.737473	25529	2408206	115	27	8	4	Leptotrichia_buccalis_DSM_1135	644736384
NODE_8371_length_5628_cov_86.299393	5712	2408206	115	27	8	4	Leptotrichia_buccalis_DSM_1135	644736384
NODE_8372_length_6273_cov_85.666351	6357	2408206	115	27	8	4	Leptotrichia_buccalis_DSM_1135	644736384
NODE_8373_length_17386_cov_85.702118	17470	2408206	115	27	8	4	Leptotrichia_buccalis_DSM_1135	644736384
NODE_8374_length_7690_cov_86.430168	7774	2408206	115	27	8	4	Leptotrichia_buccalis_DSM_1135	644736384
NODE_8377_length_3482_cov_87.127800	3566	2408206	115	27	8	4	Leptotrichia_buccalis_DSM_1135	644736384
NODE_8378_length_634_cov_86.015770	718	2408206	115	27	0	4	Leptotrichia_buccalis_DSM_1135	644736384
NODE_8379_length_5750_cov_87.316521	5834	2408206	115	27	8	4	Leptotrichia_buccalis_DSM_1135	644736384
NODE_8380_length_4085_cov_86.394615	4169	2408206	115	27	8	4	Leptotrichia_buccalis_DSM_1135	644736384
NODE_8381_length_1279_cov_85.834244	1363	2408206	115	27	0	4	Leptotrichia_buccalis_DSM_1135	644736384
NODE_8382_length_10760_cov_85.594147	10844	2408206	115	27	8	4	Leptotrichia_buccalis_DSM_1135	644736384
NODE_8383_length_1926_cov_85.311523	2010	2408206	115	27	0	3	Leptotrichia_buccalis_DSM_1135	644736384
NODE_8384_length_709_cov_83.322990	793	2408206	115	27	0	0	Leptotrichia_buccalis_DSM_1135	644736384
NODE_8386_length_2600_cov_86.313843	2684	2408206	115	27	8	4	Leptotrichia_buccalis_DSM_1135	644736384
NODE_8387_length_11133_cov_85.260490	11217	2408206	115	27	0	4	Leptotrichia_buccalis_DSM_1135	644736384
NODE_8388_length_1994_cov_84.948341	2078	2408206	115	27	8	3	Leptotrichia_buccalis_DSM_1135	644736384
NODE_8390_length_593_cov_86.414841	677	2408206	115	27	0	3	Leptotrichia_buccalis_DSM_1135	644736384
NODE_8391_length_6462_cov_84.955589	6546	2408206	115	27	8	4	Leptotrichia_buccalis_DSM_1135	644736384
NODE_8392_length_7188_cov_85.995689	7272	2408206	115	27	8	4	Leptotrichia_buccalis_DSM_1135	644736384
NODE_8393_length_13967_cov_86.298416	14051	2408206	115	27	8	3	Leptotrichia_buccalis_DSM_1135	644736384
NODE_8394_length_6940_cov_86.563545	7024	2408206	115	27	8	4	Leptotrichia_buccalis_DSM_1135	644736384
NODE_8395_length_547_cov_84.862892	631	2408206	115	27	0	4	Leptotrichia_buccalis_DSM_1135	644736384
NODE_8396_length_583_cov_89.193825	667	2408206	115	27	0	0	Leptotrichia_buccalis_DSM_1135	644736384
NODE_8399_length_4283_cov_84.645805	4367	2408206	115	27	0	4	Leptotrichia_buccalis_DSM_1135	644736384
NODE_8401_length_730_cov_87.494522	814	2408206	115	27	0	3	Leptotrichia_buccalis_DSM_1135	644736384
NODE_8406_length_2191_cov_86.874031	2275	2408206	115	27	8	3	Leptotrichia_buccalis_DSM_1135	644736384
NODE_8408_length_3206_cov_86.284157	3290	2408206	115	27	8	4	Leptotrichia_buccalis_DSM_1135	644736384
NODE_8409_length_752_cov_85.501328	836	2408206	115	27	0	4	Leptotrichia_buccalis_DSM_1135	644736384
NODE_8410_length_3769_cov_84.318916	3853	2408206	115	27	8	4	Leptotrichia_buccalis_DSM_1135	644736384
NODE_8412_length_1216_cov_85.877464	1300	2408206	115	27	0	0	Leptotrichia_buccalis_DSM_1135	644736384
NODE_8413_length_4479_cov_86.345612	4563	2408206	115	27	8	4	Leptotrichia_buccalis_DSM_1135	644736384
NODE_8414_length_913_cov_82.161011	997	2408206	115	27	0	4	Leptotrichia_buccalis_DSM_1135	644736384
NODE_8418_length_1460_cov_85.969177	1544	2408206	115	27	0	0	Leptotrichia_buccalis_DSM_1135	644736384
NODE_8419_length_477_cov_88.985329	561	2408206	115	27	0	4	Leptotrichia_buccalis_DSM_1135	644736384
NODE_8421_length_439_cov_85.104782	523	2408206	115	27	0	0	Leptotrichia_buccalis_DSM_1135	644736384
NODE_8423_length_785_cov_85.443314	869	2408206	115	27	0	0	Leptotrichia_buccalis_DSM_1135	644736384
NODE_8424_length_2900_cov_85.079659	2984	2408206	115	27	8	4	Leptotrichia_buccalis_DSM_1135	644736384
NODE_8426_length_741_cov_84.875847	825	2408206	115	27	0	3	Leptotrichia_buccalis_DSM_1135	644736384
NODE_8429_length_823_cov_87.343864	907	2408206	115	27	0	4	Leptotrichia_buccalis_DSM_1135	644736384
NODE_8440_length_1228_cov_82.729645	1312	2408206	115	27	0	4	Leptotrichia_buccalis_DSM_1135	644736384
NODE_8447_length_1503_cov_426.819702	1587	2408206	115	27	0	0	Leptotrichia_buccalis_DSM_1135	644736384
NODE_8453_length_741_cov_166.236160	825	2408206	115	27	0	0	Leptotrichia_buccalis_DSM_1135	644736384
NODE_8455_length_466_cov_85.291847	550	2408206	115	27	0	0	Leptotrichia_buccalis_DSM_1135	644736384
NODE_8460_length_686_cov_87.148689	770	2408206	115	27	0	4	Leptotrichia_buccalis_DSM_1135	644736384
NODE_8462_length_1173_cov_85.338448	1257	2408206	115	27	0	3	Leptotrichia_buccalis_DSM_1135	644736384
NODE_8483_length_850_cov_88.570587	934	2408206	115	27	0	4	Leptotrichia_buccalis_DSM_1135	644736384
NODE_8499_length_842_cov_83.124702	926	2408206	115	27	0	4	Leptotrichia_buccalis_DSM_1135	644736384
NODE_1965_length_161120_cov_27.547146	161204	4897353	119	6	38	12	Syntrophobacter_fumaroxidans_MPOB	639633063
NODE_1966_length_354980_cov_27.555424	355064	4897353	119	6	38	12	Syntrophobacter_fumaroxidans_MPOB	639633063
NODE_1967_length_29509_cov_27.464062	29593	4897353	119	6	38	12	Syntrophobacter_fumaroxidans_MPOB	639633063
NODE_1968_length_31038_cov_27.946196	31122	4897353	119	6	38	12	Syntrophobacter_fumaroxidans_MPOB	639633063
NODE_1969_length_128770_cov_27.546610	128854	4897353	119	6	38	12	Syntrophobacter_fumaroxidans_MPOB	639633063
NODE_1970_length_92601_cov_27.455967	92685	4897353	119	6	38	12	Syntrophobacter_fumaroxidans_MPOB	639633063
NODE_1971_length_99940_cov_28.033720	100024	4897353	119	6	0	12	Syntrophobacter_fumaroxidans_MPOB	639633063
NODE_1972_length_86330_cov_27.546450	86414	4897353	119	6	38	12	Syntrophobacter_fumaroxidans_MPOB	639633063
NODE_1973_length_103953_cov_27.525930	104037	4897353	119	6	38	12	Syntrophobacter_fumaroxidans_MPOB	639633063
NODE_1974_length_27632_cov_27.398378	27716	4897353	119	6	0	12	Syntrophobacter_fumaroxidans_MPOB	639633063
NODE_1975_length_107536_cov_27.454918	107620	4897353	119	6	38	12	Syntrophobacter_fumaroxidans_MPOB	639633063
NODE_1976_length_30267_cov_27.282585	30351	4897353	119	6	38	12	Syntrophobacter_fumaroxidans_MPOB	639633063
NODE_1977_length_82317_cov_27.292648	82401	4897353	119	6	38	12	Syntrophobacter_fumaroxidans_MPOB	639633063
NODE_1978_length_76983_cov_27.481497	77067	4897353	119	6	38	12	Syntrophobacter_fumaroxidans_MPOB	639633063
NODE_1979_length_63101_cov_27.354479	63185	4897353	119	6	38	12	Syntrophobacter_fumaroxidans_MPOB	639633063
NODE_1980_length_69696_cov_27.588858	69780	4897353	119	6	38	12	Syntrophobacter_fumaroxidans_MPOB	639633063
NODE_1981_length_165384_cov_27.334967	165468	4897353	119	6	38	12	Syntrophobacter_fumaroxidans_MPOB	639633063
NODE_1982_length_79480_cov_27.399572	79564	4897353	119	6	38	12	Syntrophobacter_fumaroxidans_MPOB	639633063
NODE_1983_length_23882_cov_27.519680	23966	4897353	119	6	38	12	Syntrophobacter_fumaroxidans_MPOB	639633063
NODE_1984_length_23890_cov_27.235914	23974	4897353	119	6	38	12	Syntrophobacter_fumaroxidans_MPOB	639633063
NODE_1985_length_59896_cov_27.338854	59980	4897353	119	6	38	12	Syntrophobacter_fumaroxidans_MPOB	639633063
NODE_1986_length_173707_cov_27.518211	173791	4897353	119	6	38	12	Syntrophobacter_fumaroxidans_MPOB	639633063
NODE_1987_length_65302_cov_27.469265	65386	4897353	119	6	38	12	Syntrophobacter_fumaroxidans_MPOB	639633063
NODE_1988_length_76118_cov_27.464371	76202	4897353	119	6	38	12	Syntrophobacter_fumaroxidans_MPOB	639633063
NODE_1989_length_263416_cov_27.489712	263500	4897353	119	6	38	12	Syntrophobacter_fumaroxidans_MPOB	639633063
NODE_1990_length_123391_cov_27.426579	123475	4897353	119	6	38	12	Syntrophobacter_fumaroxidans_MPOB	639633063
NODE_1991_length_41145_cov_27.229628	41229	4897353	119	6	38	12	Syntrophobacter_fumaroxidans_MPOB	639633063
NODE_1992_length_82559_cov_27.518515	82643	4897353	119	6	38	12	Syntrophobacter_fumaroxidans_MPOB	639633063
NODE_1993_length_29505_cov_27.415388	29589	4897353	119	6	38	12	Syntrophobacter_fumaroxidans_MPOB	639633063
NODE_1994_length_88782_cov_27.557072	88866	4897353	119	6	38	12	Syntrophobacter_fumaroxidans_MPOB	639633063
NODE_1995_length_80749_cov_27.317390	80833	4897353	119	6	38	12	Syntrophobacter_fumaroxidans_MPOB	639633063
NODE_1996_length_135969_cov_27.346828	136053	4897353	119	6	38	12	Syntrophobacter_fumaroxidans_MPOB	639633063
NODE_1997_length_84455_cov_27.429993	84539	4897353	119	6	38	12	Syntrophobacter_fumaroxidans_MPOB	639633063
NODE_1998_length_23374_cov_27.261572	23458	4897353	119	6	38	12	Syntrophobacter_fumaroxidans_MPOB	639633063
NODE_1999_length_35018_cov_27.162716	35102	4897353	119	6	38	12	Syntrophobacter_fumaroxidans_MPOB	639633063
NODE_2000_length_38975_cov_27.332726	39059	4897353	119	6	38	12	Syntrophobacter_fumaroxidans_MPOB	639633063
NODE_2001_length_85264_cov_27.513945	85348	4897353	119	6	38	12	Syntrophobacter_fumaroxidans_MPOB	639633063
NODE_2002_length_201066_cov_27.534781	201150	4897353	119	6	38	12	Syntrophobacter_fumaroxidans_MPOB	639633063
NODE_2003_length_34674_cov_27.493395	34758	4897353	119	6	38	12	Syntrophobacter_fumaroxidans_MPOB	639633063
NODE_2004_length_32058_cov_27.261152	32142	4897353	119	6	38	12	Syntrophobacter_fumaroxidans_MPOB	639633063
NODE_2005_length_42876_cov_27.612114	42960	4897353	119	6	38	12	Syntrophobacter_fumaroxidans_MPOB	639633063
NODE_2006_length_1173_cov_26.918159	1257	4897353	119	6	0	12	Syntrophobacter_fumaroxidans_MPOB	639633063
NODE_2007_length_27156_cov_27.453049	27240	4897353	119	6	38	12	Syntrophobacter_fumaroxidans_MPOB	639633063
NODE_2008_length_11673_cov_27.301979	11757	4897353	119	6	0	12	Syntrophobacter_fumaroxidans_MPOB	639633063
NODE_2009_length_114457_cov_27.348236	114541	4897353	119	6	38	12	Syntrophobacter_fumaroxidans_MPOB	639633063
NODE_2010_length_133017_cov_27.395475	133101	4897353	119	6	38	12	Syntrophobacter_fumaroxidans_MPOB	639633063
NODE_2011_length_69971_cov_27.356005	70055	4897353	119	6	38	12	Syntrophobacter_fumaroxidans_MPOB	639633063
NODE_2012_length_77541_cov_27.507938	77625	4897353	119	6	38	12	Syntrophobacter_fumaroxidans_MPOB	639633063
NODE_2013_length_13715_cov_27.168137	13799	4897353	119	6	38	12	Syntrophobacter_fumaroxidans_MPOB	639633063
NODE_2014_length_35404_cov_27.363489	35488	4897353	119	6	38	12	Syntrophobacter_fumaroxidans_MPOB	639633063
NODE_2015_length_60661_cov_27.209229	60745	4897353	119	6	38	12	Syntrophobacter_fumaroxidans_MPOB	639633063
NODE_2016_length_20788_cov_27.666298	20872	4897353	119	6	38	12	Syntrophobacter_fumaroxidans_MPOB	639633063
NODE_2017_length_13876_cov_27.703949	13960	4897353	119	6	0	12	Syntrophobacter_fumaroxidans_MPOB	639633063
NODE_2018_length_31344_cov_27.614376	31428	4897353	119	6	0	12	Syntrophobacter_fumaroxidans_MPOB	639633063
NODE_2019_length_19205_cov_27.185734	19289	4897353	119	6	38	12	Syntrophobacter_fumaroxidans_MPOB	639633063
NODE_2020_length_15446_cov_27.715719	15530	4897353	119	6	38	12	Syntrophobacter_fumaroxidans_MPOB	639633063
NODE_2021_length_36111_cov_27.425493	36195	4897353	119	6	38	12	Syntrophobacter_fumaroxidans_MPOB	639633063
NODE_2022_length_26014_cov_27.498924	26098	4897353	119	6	38	12	Syntrophobacter_fumaroxidans_MPOB	639633063
NODE_2023_length_27200_cov_27.441286	27284	4897353	119	6	38	12	Syntrophobacter_fumaroxidans_MPOB	639633063
NODE_2024_length_7302_cov_27.866749	7386	4897353	119	6	38	12	Syntrophobacter_fumaroxidans_MPOB	639633063
NODE_2025_length_74753_cov_27.551710	74837	4897353	119	6	38	12	Syntrophobacter_fumaroxidans_MPOB	639633063
NODE_2026_length_46191_cov_27.521963	46275	4897353	119	6	38	12	Syntrophobacter_fumaroxidans_MPOB	639633063
NODE_2029_length_7739_cov_27.811604	7823	4897353	119	6	0	12	Syntrophobacter_fumaroxidans_MPOB	639633063
NODE_2030_length_20837_cov_27.662140	20921	4897353	119	6	38	12	Syntrophobacter_fumaroxidans_MPOB	639633063
NODE_2031_length_4890_cov_27.100409	4974	4897353	119	6	38	12	Syntrophobacter_fumaroxidans_MPOB	639633063
NODE_2032_length_36773_cov_27.449596	36857	4897353	119	6	38	12	Syntrophobacter_fumaroxidans_MPOB	639633063
NODE_2033_length_16557_cov_27.638945	16641	4897353	119	6	38	12	Syntrophobacter_fumaroxidans_MPOB	639633063
NODE_2034_length_11437_cov_27.687069	11521	4897353	119	6	38	12	Syntrophobacter_fumaroxidans_MPOB	639633063
NODE_2035_length_20443_cov_27.197231	20527	4897353	119	6	38	12	Syntrophobacter_fumaroxidans_MPOB	639633063
NODE_2036_length_60565_cov_27.813391	60649	4897353	119	6	38	12	Syntrophobacter_fumaroxidans_MPOB	639633063
NODE_2037_length_24581_cov_27.777023	24665	4897353	119	6	38	12	Syntrophobacter_fumaroxidans_MPOB	639633063
NODE_2038_length_7590_cov_27.097364	7674	4897353	119	6	38	12	Syntrophobacter_fumaroxidans_MPOB	639633063
NODE_2039_length_18105_cov_27.815632	18189	4897353	119	6	38	12	Syntrophobacter_fumaroxidans_MPOB	639633063
NODE_2040_length_12479_cov_27.198414	12563	4897353	119	6	38	12	Syntrophobacter_fumaroxidans_MPOB	639633063
NODE_2041_length_3564_cov_27.604378	3648	4897353	119	6	38	12	Syntrophobacter_fumaroxidans_MPOB	639633063
NODE_2042_length_3053_cov_27.833279	3137	4897353	119	6	0	12	Syntrophobacter_fumaroxidans_MPOB	639633063
NODE_2043_length_44676_cov_54.775360	44760	4897353	119	6	38	12	Syntrophobacter_fumaroxidans_MPOB	639633063
NODE_2044_length_2388_cov_26.719849	2472	4897353	119	6	0	0	Syntrophobacter_fumaroxidans_MPOB	639633063
NODE_2045_length_6718_cov_27.071747	6802	4897353	119	6	38	12	Syntrophobacter_fumaroxidans_MPOB	639633063
NODE_2046_length_4353_cov_27.993568	4437	4897353	119	6	38	12	Syntrophobacter_fumaroxidans_MPOB	639633063
NODE_2047_length_6878_cov_27.095522	6962	4897353	119	6	38	12	Syntrophobacter_fumaroxidans_MPOB	639633063
NODE_2048_length_5187_cov_27.158279	5271	4897353	119	6	38	12	Syntrophobacter_fumaroxidans_MPOB	639633063
NODE_2049_length_7974_cov_27.577627	8058	4897353	119	6	38	12	Syntrophobacter_fumaroxidans_MPOB	639633063
NODE_2050_length_9046_cov_27.478664	9130	4897353	119	6	38	12	Syntrophobacter_fumaroxidans_MPOB	639633063
NODE_2052_length_3718_cov_27.650351	3802	4897353	119	6	0	12	Syntrophobacter_fumaroxidans_MPOB	639633063
NODE_2053_length_1523_cov_27.520027	1607	4897353	119	6	0	12	Syntrophobacter_fumaroxidans_MPOB	639633063
NODE_2054_length_11042_cov_27.339521	11126	4897353	119	6	38	12	Syntrophobacter_fumaroxidans_MPOB	639633063
NODE_2055_length_4534_cov_26.878473	4618	4897353	119	6	38	12	Syntrophobacter_fumaroxidans_MPOB	639633063
NODE_2056_length_1475_cov_27.593899	1559	4897353	119	6	0	12	Syntrophobacter_fumaroxidans_MPOB	639633063
NODE_2057_length_2023_cov_27.217499	2107	4897353	119	6	0	12	Syntrophobacter_fumaroxidans_MPOB	639633063
NODE_2058_length_436_cov_27.034403	520	4897353	119	6	0	12	Syntrophobacter_fumaroxidans_MPOB	639633063
NODE_2059_length_2601_cov_27.910419	2685	4897353	119	6	0	12	Syntrophobacter_fumaroxidans_MPOB	639633063
NODE_2060_length_1411_cov_26.386251	1495	4897353	119	6	0	12	Syntrophobacter_fumaroxidans_MPOB	639633063
NODE_2062_length_4373_cov_27.284931	4457	4897353	119	6	38	12	Syntrophobacter_fumaroxidans_MPOB	639633063
NODE_2063_length_1396_cov_25.894699	1480	4897353	119	6	0	12	Syntrophobacter_fumaroxidans_MPOB	639633063
NODE_2064_length_480_cov_28.258333	564	4897353	119	6	0	12	Syntrophobacter_fumaroxidans_MPOB	639633063
NODE_2065_length_1154_cov_28.725304	1238	4897353	119	6	0	12	Syntrophobacter_fumaroxidans_MPOB	639633063
NODE_2068_length_2200_cov_27.758636	2284	4897353	119	6	38	12	Syntrophobacter_fumaroxidans_MPOB	639633063
NODE_2070_length_420_cov_27.561905	504	4897353	119	6	0	0	Syntrophobacter_fumaroxidans_MPOB	639633063
NODE_2071_length_869_cov_27.840046	953	4897353	119	6	0	12	Syntrophobacter_fumaroxidans_MPOB	639633063
NODE_2073_length_1973_cov_27.090725	2057	4897353	119	6	38	0	Syntrophobacter_fumaroxidans_MPOB	639633063
NODE_2076_length_1391_cov_83.684402	1475	4897353	119	6	0	12	Syntrophobacter_fumaroxidans_MPOB	639633063
NODE_2077_length_617_cov_55.998379	701	4897353	119	6	0	0	Syntrophobacter_fumaroxidans_MPOB	639633063
NODE_2078_length_583_cov_28.312178	667	4897353	119	6	0	12	Syntrophobacter_fumaroxidans_MPOB	639633063
NODE_2079_length_2368_cov_55.088684	2452	4897353	119	6	0	12	Syntrophobacter_fumaroxidans_MPOB	639633063
NODE_2084_length_3164_cov_54.064793	3248	4897353	119	6	0	12	Syntrophobacter_fumaroxidans_MPOB	639633063
NODE_2086_length_550_cov_56.639999	634	4897353	119	6	0	12	Syntrophobacter_fumaroxidans_MPOB	639633063
NODE_2088_length_592_cov_52.883446	676	4897353	119	6	0	12	Syntrophobacter_fumaroxidans_MPOB	639633063
NODE_2089_length_556_cov_56.634892	640	4897353	119	6	0	0	Syntrophobacter_fumaroxidans_MPOB	639633063
NODE_2092_length_700_cov_138.401428	784	4897353	119	6	0	0	Syntrophobacter_fumaroxidans_MPOB	639633063
NODE_2095_length_1041_cov_55.683956	1125	4897353	119	6	0	12	Syntrophobacter_fumaroxidans_MPOB	639633063
NODE_2100_length_1549_cov_53.297611	1633	4897353	119	6	0	0	Syntrophobacter_fumaroxidans_MPOB	639633063
NODE_2107_length_3862_cov_55.323925	3946	4897353	119	6	34	12	Syntrophobacter_fumaroxidans_MPOB	639633063
NODE_2110_length_441_cov_26.863945	525	4897353	119	6	0	0	Syntrophobacter_fumaroxidans_MPOB	639633063
NODE_2114_length_696_cov_133.886490	780	4897353	119	6	0	0	Syntrophobacter_fumaroxidans_MPOB	639633063
NODE_2132_length_441_cov_55.208618	525	4897353	119	6	0	12	Syntrophobacter_fumaroxidans_MPOB	639633063
NODE_2155_length_655_cov_55.595421	739	4897353	119	6	0	0	Syntrophobacter_fumaroxidans_MPOB	639633063
NODE_2170_length_418_cov_28.710526	502	4897353	119	6	0	12	Syntrophobacter_fumaroxidans_MPOB	639633063
NODE_2212_length_562_cov_36.642349	646	4897353	119	6	0	7	Syntrophobacter_fumaroxidans_MPOB	639633063
NODE_14143_length_119499_cov_55.080719	119583	4019041	43	12	39	35	Halomonas_elongata_DSM_2581	648028030
NODE_14146_length_147465_cov_54.965740	147549	4019041	43	12	39	35	Halomonas_elongata_DSM_2581	648028030
NODE_14147_length_145383_cov_55.092754	145467	4019041	43	12	39	35	Halomonas_elongata_DSM_2581	648028030
NODE_14149_length_584537_cov_55.069794	584621	4019041	43	12	39	35	Halomonas_elongata_DSM_2581	648028030
NODE_14150_length_457932_cov_55.076607	458016	4019041	43	12	39	35	Halomonas_elongata_DSM_2581	648028030
NODE_14151_length_54429_cov_55.143436	54513	4019041	43	12	39	35	Halomonas_elongata_DSM_2581	648028030
NODE_14152_length_133464_cov_54.944668	133548	4019041	43	12	39	35	Halomonas_elongata_DSM_2581	648028030
NODE_14153_length_123126_cov_55.090191	123210	4019041	43	12	39	35	Halomonas_elongata_DSM_2581	648028030
NODE_14154_length_127989_cov_54.996899	128073	4019041	43	12	39	35	Halomonas_elongata_DSM_2581	648028030
NODE_14155_length_148431_cov_54.846233	148515	4019041	43	12	39	35	Halomonas_elongata_DSM_2581	648028030
NODE_14156_length_653529_cov_55.066250	653613	4019041	43	12	39	35	Halomonas_elongata_DSM_2581	648028030
NODE_14157_length_385507_cov_55.017689	385591	4019041	43	12	39	35	Halomonas_elongata_DSM_2581	648028030
NODE_14158_length_29247_cov_55.528328	29331	4019041	43	12	39	35	Halomonas_elongata_DSM_2581	648028030
NODE_14159_length_166860_cov_55.002602	166944	4019041	43	12	39	35	Halomonas_elongata_DSM_2581	648028030
NODE_14160_length_141694_cov_54.989117	141778	4019041	43	12	39	35	Halomonas_elongata_DSM_2581	648028030
NODE_14161_length_148080_cov_54.981819	148164	4019041	43	12	39	35	Halomonas_elongata_DSM_2581	648028030
NODE_14162_length_9642_cov_54.914539	9726	4019041	43	12	39	35	Halomonas_elongata_DSM_2581	648028030
NODE_14165_length_65215_cov_54.822647	65299	4019041	43	12	39	35	Halomonas_elongata_DSM_2581	648028030
NODE_14166_length_45237_cov_55.003315	45321	4019041	43	12	39	35	Halomonas_elongata_DSM_2581	648028030
NODE_14167_length_110141_cov_55.056355	110225	4019041	43	12	39	35	Halomonas_elongata_DSM_2581	648028030
NODE_14168_length_76110_cov_54.971134	76194	4019041	43	12	39	35	Halomonas_elongata_DSM_2581	648028030
NODE_14169_length_34367_cov_54.843922	34451	4019041	43	12	39	35	Halomonas_elongata_DSM_2581	648028030
NODE_14170_length_30753_cov_54.960461	30837	4019041	43	12	39	35	Halomonas_elongata_DSM_2581	648028030
NODE_14171_length_27481_cov_54.934063	27565	4019041	43	12	39	35	Halomonas_elongata_DSM_2581	648028030
NODE_14172_length_920_cov_110.628258	1004	4019041	43	12	0	0	Halomonas_elongata_DSM_2581	648028030
NODE_14173_length_10374_cov_54.895218	10458	4019041	43	12	0	35	Halomonas_elongata_DSM_2581	648028030
NODE_14180_length_554_cov_220.267151	638	4019041	43	12	0	0	Halomonas_elongata_DSM_2581	648028030
NODE_14181_length_22133_cov_54.841957	22217	4019041	43	12	39	35	Halomonas_elongata_DSM_2581	648028030
NODE_14182_length_1569_cov_109.177818	1653	4019041	43	12	0	0	Halomonas_elongata_DSM_2581	648028030
NODE_14183_length_1996_cov_222.696396	2080	4019041	43	12	18	0	Halomonas_elongata_DSM_2581	648028030
NODE_14191_length_1491_cov_167.327301	1575	4019041	43	12	0	0	Halomonas_elongata_DSM_2581	648028030
NODE_14194_length_7255_cov_55.196693	7339	4019041	43	12	39	35	Halomonas_elongata_DSM_2581	648028030
NODE_14199_length_517_cov_55.572533	601	4019041	43	12	0	0	Halomonas_elongata_DSM_2581	648028030
NODE_14203_length_472_cov_56.936440	556	4019041	43	12	0	0	Halomonas_elongata_DSM_2581	648028030
NODE_14209_length_474_cov_53.118145	558	4019041	43	12	0	0	Halomonas_elongata_DSM_2581	648028030
NODE_14214_length_474_cov_55.744724	558	4019041	43	12	0	0	Halomonas_elongata_DSM_2581	648028030
NODE_14221_length_549_cov_109.506378	633	4019041	43	12	0	0	Halomonas_elongata_DSM_2581	648028030
NODE_14229_length_460_cov_56.126087	544	4019041	43	12	0	0	Halomonas_elongata_DSM_2581	648028030
NODE_14236_length_580_cov_55.129311	664	4019041	43	12	0	0	Halomonas_elongata_DSM_2581	648028030
NODE_14247_length_1333_cov_110.414101	1417	4019041	43	12	0	0	Halomonas_elongata_DSM_2581	648028030
NODE_14257_length_580_cov_53.903450	664	4019041	43	12	0	0	Halomonas_elongata_DSM_2581	648028030
NODE_14267_length_490_cov_224.195923	574	4019041	43	12	0	0	Halomonas_elongata_DSM_2581	648028030
NODE_14277_length_702_cov_107.135330	786	4019041	43	12	0	0	Halomonas_elongata_DSM_2581	648028030
NODE_7060_length_200908_cov_44.254391	200992	4284628	55	10	19	51	Natronococcus_occultus_SP4_DSM_3396_Natoc_Contig267	2506520044
NODE_7061_length_68052_cov_44.045773	68136	4284628	55	10	19	51	Natronococcus_occultus_SP4_DSM_3396_Natoc_Contig267	2506520044
NODE_7062_length_215297_cov_44.410904	215381	4284628	55	10	19	51	Natronococcus_occultus_SP4_DSM_3396_Natoc_Contig267	2506520044
NODE_7063_length_353674_cov_44.376534	353758	4284628	55	10	19	51	Natronococcus_occultus_SP4_DSM_3396_Natoc_Contig267	2506520044
NODE_7064_length_105404_cov_44.336201	105488	4284628	55	10	19	51	Natronococcus_occultus_SP4_DSM_3396_Natoc_Contig267	2506520044
NODE_7065_length_238470_cov_44.305893	238554	4284628	55	10	19	51	Natronococcus_occultus_SP4_DSM_3396_Natoc_Contig267	2506520044
NODE_7066_length_327455_cov_44.317299	327539	4284628	55	10	19	51	Natronococcus_occultus_SP4_DSM_3396_Natoc_Contig267	2506520044
NODE_7067_length_32741_cov_44.311962	32825	4284628	55	10	19	51	Natronococcus_occultus_SP4_DSM_3396_Natoc_Contig267	2506520044
NODE_7068_length_363909_cov_44.337055	363993	4284628	55	10	19	51	Natronococcus_occultus_SP4_DSM_3396_Natoc_Contig267	2506520044
NODE_7069_length_161029_cov_44.342365	161113	4284628	55	10	19	51	Natronococcus_occultus_SP4_DSM_3396_Natoc_Contig267	2506520044
NODE_7070_length_282906_cov_44.256657	282990	4284628	55	10	19	51	Natronococcus_occultus_SP4_DSM_3396_Natoc_Contig267	2506520044
NODE_7071_length_217942_cov_44.301666	218026	4284628	55	10	19	51	Natronococcus_occultus_SP4_DSM_3396_Natoc_Contig267	2506520044
NODE_7072_length_148391_cov_44.557480	148475	4284628	55	10	19	51	Natronococcus_occultus_SP4_DSM_3396_Natoc_Contig267	2506520044
NODE_7073_length_34861_cov_44.387081	34945	4284628	55	10	19	51	Natronococcus_occultus_SP4_DSM_3396_Natoc_Contig267	2506520044
NODE_7074_length_48945_cov_44.320747	49029	4284628	55	10	19	51	Natronococcus_occultus_SP4_DSM_3396_Natoc_Contig267	2506520044
NODE_7075_length_142467_cov_44.530334	142551	4284628	55	10	19	51	Natronococcus_occultus_SP4_DSM_3396_Natoc_Contig267	2506520044
NODE_7076_length_39768_cov_44.331120	39852	4284628	55	10	19	51	Natronococcus_occultus_SP4_DSM_3396_Natoc_Contig267	2506520044
NODE_7077_length_61241_cov_44.245213	61325	4284628	55	10	19	51	Natronococcus_occultus_SP4_DSM_3396_Natoc_Contig267	2506520044
NODE_7078_length_67411_cov_44.194077	67495	4284628	55	10	19	51	Natronococcus_occultus_SP4_DSM_3396_Natoc_Contig267	2506520044
NODE_7079_length_81622_cov_44.190254	81706	4284628	55	10	19	51	Natronococcus_occultus_SP4_DSM_3396_Natoc_Contig267	2506520044
NODE_7080_length_16547_cov_43.935154	16631	4284628	55	10	0	51	Natronococcus_occultus_SP4_DSM_3396_Natoc_Contig267	2506520044
NODE_7081_length_142840_cov_44.327778	142924	4284628	55	10	19	51	Natronococcus_occultus_SP4_DSM_3396_Natoc_Contig267	2506520044
NODE_7082_length_62609_cov_44.327747	62693	4284628	55	10	19	51	Natronococcus_occultus_SP4_DSM_3396_Natoc_Contig267	2506520044
NODE_7083_length_77710_cov_44.501080	77794	4284628	55	10	19	51	Natronococcus_occultus_SP4_DSM_3396_Natoc_Contig267	2506520044
NODE_7085_length_53432_cov_44.299541	53516	4284628	55	10	19	51	Natronococcus_occultus_SP4_DSM_3396_Natoc_Contig267	2506520044
NODE_7086_length_40590_cov_44.209362	40674	4284628	55	10	19	51	Natronococcus_occultus_SP4_DSM_3396_Natoc_Contig267	2506520044
NODE_7087_length_52531_cov_44.490814	52615	4284628	55	10	19	51	Natronococcus_occultus_SP4_DSM_3396_Natoc_Contig267	2506520044
NODE_7088_length_69519_cov_44.356995	69603	4284628	55	10	19	51	Natronococcus_occultus_SP4_DSM_3396_Natoc_Contig267	2506520044
NODE_7089_length_1428_cov_179.968491	1512	4284628	55	10	0	0	Natronococcus_occultus_SP4_DSM_3396_Natoc_Contig267	2506520044
NODE_7090_length_28484_cov_44.157982	28568	4284628	55	10	19	51	Natronococcus_occultus_SP4_DSM_3396_Natoc_Contig267	2506520044
NODE_7091_length_29622_cov_44.346836	29706	4284628	55	10	19	51	Natronococcus_occultus_SP4_DSM_3396_Natoc_Contig267	2506520044
NODE_7092_length_46384_cov_44.305473	46468	4284628	55	10	19	51	Natronococcus_occultus_SP4_DSM_3396_Natoc_Contig267	2506520044
NODE_7093_length_953_cov_174.245544	1037	4284628	55	10	0	0	Natronococcus_occultus_SP4_DSM_3396_Natoc_Contig267	2506520044
NODE_7094_length_1796_cov_178.995544	1880	4284628	55	10	0	0	Natronococcus_occultus_SP4_DSM_3396_Natoc_Contig267	2506520044
NODE_7095_length_13959_cov_44.630417	14043	4284628	55	10	19	51	Natronococcus_occultus_SP4_DSM_3396_Natoc_Contig267	2506520044
NODE_7096_length_32498_cov_44.365868	32582	4284628	55	10	0	51	Natronococcus_occultus_SP4_DSM_3396_Natoc_Contig267	2506520044
NODE_7097_length_21361_cov_44.597023	21445	4284628	55	10	19	51	Natronococcus_occultus_SP4_DSM_3396_Natoc_Contig267	2506520044
NODE_7098_length_35875_cov_44.354061	35959	4284628	55	10	19	51	Natronococcus_occultus_SP4_DSM_3396_Natoc_Contig267	2506520044
NODE_7099_length_504_cov_43.567459	588	4284628	55	10	0	51	Natronococcus_occultus_SP4_DSM_3396_Natoc_Contig267	2506520044
NODE_7100_length_1197_cov_41.023392	1281	4284628	55	10	0	51	Natronococcus_occultus_SP4_DSM_3396_Natoc_Contig267	2506520044
NODE_7102_length_19310_cov_44.156395	19394	4284628	55	10	19	51	Natronococcus_occultus_SP4_DSM_3396_Natoc_Contig267	2506520044
NODE_7103_length_2265_cov_44.803974	2349	4284628	55	10	0	51	Natronococcus_occultus_SP4_DSM_3396_Natoc_Contig267	2506520044
NODE_7104_length_22226_cov_44.680553	22310	4284628	55	10	19	51	Natronococcus_occultus_SP4_DSM_3396_Natoc_Contig267	2506520044
NODE_7109_length_2274_cov_43.345646	2358	4284628	55	10	0	51	Natronococcus_occultus_SP4_DSM_3396_Natoc_Contig267	2506520044
NODE_7110_length_14662_cov_44.319057	14746	4284628	55	10	19	51	Natronococcus_occultus_SP4_DSM_3396_Natoc_Contig267	2506520044
NODE_7123_length_482_cov_89.078835	566	4284628	55	10	0	0	Natronococcus_occultus_SP4_DSM_3396_Natoc_Contig267	2506520044
NODE_7129_length_1025_cov_43.597073	1109	4284628	55	10	0	51	Natronococcus_occultus_SP4_DSM_3396_Natoc_Contig267	2506520044
NODE_7139_length_1013_cov_44.170780	1097	4284628	55	10	0	51	Natronococcus_occultus_SP4_DSM_3396_Natoc_Contig267	2506520044
NODE_7173_length_12853_cov_44.635181	12937	4284628	55	10	0	51	Natronococcus_occultus_SP4_DSM_3396_Natoc_Contig265	2506520044
NODE_7174_length_34704_cov_44.226776	34788	4284628	55	10	0	51	Natronococcus_occultus_SP4_DSM_3396_Natoc_Contig266	2506520044
NODE_7176_length_172913_cov_44.466667	172997	4284628	55	10	19	51	Natronococcus_occultus_SP4_DSM_3396_Natoc_Contig266	2506520044
NODE_7177_length_39931_cov_43.991283	40015	4284628	55	10	19	51	Natronococcus_occultus_SP4_DSM_3396_Natoc_Contig266	2506520044
NODE_7178_length_21232_cov_44.415977	21316	4284628	55	10	19	51	Natronococcus_occultus_SP4_DSM_3396_Natoc_Contig266	2506520044
NODE_7179_length_10409_cov_43.711884	10493	4284628	55	10	19	51	Natronococcus_occultus_SP4_DSM_3396_Natoc_Contig266	2506520044
NODE_7180_length_6997_cov_44.406174	7081	4284628	55	10	0	51	Natronococcus_occultus_SP4_DSM_3396_Natoc_Contig266	2506520044
NODE_12829_length_470_cov_44.917023	554	2011934	24	31	0	3	Streptococcus_mutans_UA159	637000288
NODE_12831_length_439_cov_28.929384	523	2011934	24	31	0	0	Streptococcus_mutans_UA159	637000288
NODE_12832_length_1016_cov_46.808071	1100	2011934	24	31	0	3	Streptococcus_mutans_UA159	637000288
NODE_12834_length_1352_cov_53.630177	1436	2011934	24	31	0	0	Streptococcus_mutans_UA159	637000288
NODE_12835_length_469063_cov_8.993705	469147	2011934	24	31	11	68	Streptococcus_mutans_UA159	637000288
NODE_12842_length_792_cov_45.039143	876	2011934	24	31	0	0	Streptococcus_mutans_UA159	637000288
NODE_12844_length_110419_cov_9.059509	110503	2011934	24	31	11	68	Streptococcus_mutans_UA159	637000288
NODE_12845_length_845_cov_18.447338	929	2011934	24	31	0	0	Streptococcus_mutans_UA159	637000288
NODE_12855_length_77865_cov_8.857625	77949	2011934	24	31	11	68	Streptococcus_mutans_UA159	637000288
NODE_12856_length_532_cov_17.248119	616	2011934	24	31	0	0	Streptococcus_mutans_UA159	637000288
NODE_14560_length_25189_cov_8.791337	25273	2011934	24	31	0	68	Streptococcus_mutans_UA159	637000288
NODE_3171_length_9025_cov_6.006648	9109	2011934	24	31	45	68	Streptococcus_mutans_UA159	637000288
NODE_3172_length_152475_cov_8.942102	152559	2011934	24	31	11	68	Streptococcus_mutans_UA159	637000288
NODE_3173_length_16469_cov_8.913777	16553	2011934	24	31	11	68	Streptococcus_mutans_UA159	637000288
NODE_3174_length_93811_cov_8.941553	93895	2011934	24	31	11	68	Streptococcus_mutans_UA159	637000288
NODE_3175_length_186481_cov_8.835313	186565	2011934	24	31	11	68	Streptococcus_mutans_UA159	637000288
NODE_3176_length_85680_cov_8.812768	85764	2011934	24	31	11	68	Streptococcus_mutans_UA159	637000288
NODE_3177_length_27747_cov_9.079144	27831	2011934	24	31	11	68	Streptococcus_mutans_UA159	637000288
NODE_3178_length_4017_cov_9.089868	4101	2011934	24	31	0	68	Streptococcus_mutans_UA159	637000288
NODE_3179_length_90286_cov_8.985933	90370	2011934	24	31	11	68	Streptococcus_mutans_UA159	637000288
NODE_3180_length_22685_cov_9.073793	22769	2011934	24	31	0	68	Streptococcus_mutans_UA159	637000288
NODE_3181_length_318786_cov_8.938595	318870	2011934	24	31	11	68	Streptococcus_mutans_UA159	637000288
NODE_3182_length_192640_cov_8.913013	192724	2011934	24	31	11	68	Streptococcus_mutans_UA159	637000288
NODE_3183_length_123850_cov_8.790197	123934	2011934	24	31	11	68	Streptococcus_mutans_UA159	637000288
NODE_2410_length_82401_cov_47.776653	82485	3547752	164	18	0	109	Eubacterium_rectale_M104/1	650377937
NODE_2411_length_19405_cov_47.523319	19489	3547752	164	18	27	109	Eubacterium_rectale_M104/1	650377937
NODE_2412_length_6593_cov_48.361443	6677	3547752	164	18	27	109	Eubacterium_rectale_M104/1	650377937
NODE_2413_length_2028_cov_46.651875	2112	3547752	164	18	0	109	Eubacterium_rectale_M104/1	650377937
NODE_2414_length_14666_cov_47.794151	14750	3547752	164	18	0	109	Eubacterium_rectale_M104/1	650377937
NODE_2415_length_1683_cov_49.578728	1767	3547752	164	18	0	109	Eubacterium_rectale_M104/1	650377937
NODE_2416_length_11407_cov_47.620232	11491	3547752	164	18	0	109	Eubacterium_rectale_M104/1	650377937
NODE_2417_length_24901_cov_48.194569	24985	3547752	164	18	26	109	Eubacterium_rectale_M104/1	650377937
NODE_2418_length_30919_cov_47.575279	31003	3547752	164	18	27	109	Eubacterium_rectale_M104/1	650377937
NODE_2419_length_23904_cov_47.878056	23988	3547752	164	18	27	109	Eubacterium_rectale_M104/1	650377937
NODE_7455_length_170844_cov_47.642429	170928	3547752	164	18	27	109	Eubacterium_rectale_M104/1	650377937
NODE_7456_length_18945_cov_47.389759	19029	3547752	164	18	27	109	Eubacterium_rectale_M104/1	650377937
NODE_7457_length_19643_cov_47.709106	19727	3547752	164	18	27	109	Eubacterium_rectale_M104/1	650377937
NODE_7458_length_10279_cov_47.449753	10363	3547752	164	18	0	109	Eubacterium_rectale_M104/1	650377937
NODE_7459_length_67141_cov_47.992226	67225	3547752	164	18	27	109	Eubacterium_rectale_M104/1	650377937
NODE_7460_length_73269_cov_47.636093	73353	3547752	164	18	27	109	Eubacterium_rectale_M104/1	650377937
NODE_7461_length_115833_cov_47.673737	115917	3547752	164	18	27	109	Eubacterium_rectale_M104/1	650377937
NODE_7462_length_93944_cov_47.834209	94028	3547752	164	18	27	109	Eubacterium_rectale_M104/1	650377937
NODE_7463_length_86202_cov_47.507286	86286	3547752	164	18	27	109	Eubacterium_rectale_M104/1	650377937
NODE_7464_length_60957_cov_47.843479	61041	3547752	164	18	27	109	Eubacterium_rectale_M104/1	650377937
NODE_7465_length_30524_cov_47.491745	30608	3547752	164	18	27	109	Eubacterium_rectale_M104/1	650377937
NODE_7466_length_30603_cov_47.873672	30687	3547752	164	18	0	109	Eubacterium_rectale_M104/1	650377937
NODE_7467_length_44977_cov_47.794472	45061	3547752	164	18	26	109	Eubacterium_rectale_M104/1	650377937
NODE_7468_length_102196_cov_47.699020	102280	3547752	164	18	27	109	Eubacterium_rectale_M104/1	650377937
NODE_7469_length_43510_cov_47.596691	43594	3547752	164	18	26	109	Eubacterium_rectale_M104/1	650377937
NODE_7470_length_59500_cov_47.537914	59584	3547752	164	18	0	109	Eubacterium_rectale_M104/1	650377937
NODE_7471_length_76765_cov_47.584381	76849	3547752	164	18	0	109	Eubacterium_rectale_M104/1	650377937
NODE_7472_length_48793_cov_47.706127	48877	3547752	164	18	27	109	Eubacterium_rectale_M104/1	650377937
NODE_7473_length_9792_cov_48.012459	9876	3547752	164	18	27	109	Eubacterium_rectale_M104/1	650377937
NODE_7474_length_97820_cov_47.548344	97904	3547752	164	18	0	109	Eubacterium_rectale_M104/1	650377937
NODE_7475_length_17442_cov_47.495815	17526	3547752	164	18	27	109	Eubacterium_rectale_M104/1	650377937
NODE_7476_length_131143_cov_47.513096	131227	3547752	164	18	27	109	Eubacterium_rectale_M104/1	650377937
NODE_7477_length_141306_cov_47.777729	141390	3547752	164	18	27	109	Eubacterium_rectale_M104/1	650377937
NODE_7478_length_31446_cov_47.311264	31530	3547752	164	18	27	109	Eubacterium_rectale_M104/1	650377937
NODE_7479_length_17115_cov_47.451824	17199	3547752	164	18	0	109	Eubacterium_rectale_M104/1	650377937
NODE_7480_length_7399_cov_48.074333	7483	3547752	164	18	36	109	Eubacterium_rectale_M104/1	650377937
NODE_7481_length_62523_cov_47.555779	62607	3547752	164	18	26	109	Eubacterium_rectale_M104/1	650377937
NODE_7482_length_49181_cov_47.998779	49265	3547752	164	18	0	109	Eubacterium_rectale_M104/1	650377937
NODE_7483_length_39228_cov_47.712780	39312	3547752	164	18	27	109	Eubacterium_rectale_M104/1	650377937
NODE_7484_length_44843_cov_47.922909	44927	3547752	164	18	0	109	Eubacterium_rectale_M104/1	650377937
NODE_7485_length_7071_cov_47.925327	7155	3547752	164	18	0	109	Eubacterium_rectale_M104/1	650377937
NODE_7486_length_42591_cov_47.596863	42675	3547752	164	18	27	109	Eubacterium_rectale_M104/1	650377937
NODE_7487_length_49035_cov_47.669991	49119	3547752	164	18	27	109	Eubacterium_rectale_M104/1	650377937
NODE_7488_length_23563_cov_47.635529	23647	3547752	164	18	26	109	Eubacterium_rectale_M104/1	650377937
NODE_7489_length_7439_cov_47.581932	7523	3547752	164	18	0	109	Eubacterium_rectale_M104/1	650377937
NODE_7490_length_6436_cov_47.796459	6520	3547752	164	18	26	109	Eubacterium_rectale_M104/1	650377937
NODE_7491_length_45099_cov_47.625225	45183	3547752	164	18	27	109	Eubacterium_rectale_M104/1	650377937
NODE_7492_length_62134_cov_47.628578	62218	3547752	164	18	27	109	Eubacterium_rectale_M104/1	650377937
NODE_7493_length_24676_cov_47.683659	24760	3547752	164	18	0	109	Eubacterium_rectale_M104/1	650377937
NODE_7494_length_6227_cov_48.236389	6311	3547752	164	18	36	109	Eubacterium_rectale_M104/1	650377937
NODE_7495_length_72791_cov_47.572803	72875	3547752	164	18	27	109	Eubacterium_rectale_M104/1	650377937
NODE_7496_length_28095_cov_47.474178	28179	3547752	164	18	27	109	Eubacterium_rectale_M104/1	650377937
NODE_7497_length_72902_cov_47.777206	72986	3547752	164	18	27	109	Eubacterium_rectale_M104/1	650377937
NODE_7498_length_26283_cov_47.839973	26367	3547752	164	18	27	109	Eubacterium_rectale_M104/1	650377937
NODE_7499_length_9954_cov_48.076252	10038	3547752	164	18	27	109	Eubacterium_rectale_M104/1	650377937
NODE_7500_length_2397_cov_46.695869	2481	3547752	164	18	27	109	Eubacterium_rectale_M104/1	650377937
NODE_7501_length_62759_cov_47.662025	62843	3547752	164	18	0	109	Eubacterium_rectale_M104/1	650377937
NODE_7502_length_6266_cov_48.138046	6350	3547752	164	18	26	109	Eubacterium_rectale_M104/1	650377937
NODE_7503_length_19352_cov_47.578079	19436	3547752	164	18	27	109	Eubacterium_rectale_M104/1	650377937
NODE_7504_length_2543_cov_47.077076	2627	3547752	164	18	0	109	Eubacterium_rectale_M104/1	650377937
NODE_7505_length_42294_cov_47.401051	42378	3547752	164	18	27	109	Eubacterium_rectale_M104/1	650377937
NODE_7506_length_40108_cov_47.733170	40192	3547752	164	18	27	109	Eubacterium_rectale_M104/1	650377937
NODE_7508_length_29213_cov_47.479511	29297	3547752	164	18	27	109	Eubacterium_rectale_M104/1	650377937
NODE_7510_length_31828_cov_48.008797	31912	3547752	164	18	27	109	Eubacterium_rectale_M104/1	650377937
NODE_7511_length_21856_cov_47.833637	21940	3547752	164	18	0	109	Eubacterium_rectale_M104/1	650377937
NODE_7512_length_29763_cov_47.604946	29847	3547752	164	18	27	109	Eubacterium_rectale_M104/1	650377937
NODE_7513_length_4288_cov_47.382229	4372	3547752	164	18	26	109	Eubacterium_rectale_M104/1	650377937
NODE_7521_length_591_cov_47.260574	675	3547752	164	18	0	0	Eubacterium_rectale_M104/1	650377937
NODE_7523_length_16891_cov_47.830204	16975	3547752	164	18	27	109	Eubacterium_rectale_M104/1	650377937
NODE_7524_length_72398_cov_47.700932	72482	3547752	164	18	26	109	Eubacterium_rectale_M104/1	650377937
NODE_7525_length_18314_cov_47.297642	18398	3547752	164	18	26	109	Eubacterium_rectale_M104/1	650377937
NODE_7526_length_15996_cov_47.594837	16080	3547752	164	18	26	109	Eubacterium_rectale_M104/1	650377937
NODE_7527_length_40636_cov_47.912319	40720	3547752	164	18	0	109	Eubacterium_rectale_M104/1	650377937
NODE_7528_length_5373_cov_48.187233	5457	3547752	164	18	0	109	Eubacterium_rectale_M104/1	650377937
NODE_7529_length_929_cov_46.697525	1013	3547752	164	18	0	109	Eubacterium_rectale_M104/1	650377937
NODE_7530_length_625_cov_46.753601	709	3547752	164	18	0	0	Eubacterium_rectale_M104/1	650377937
NODE_7531_length_2161_cov_46.980564	2245	3547752	164	18	0	109	Eubacterium_rectale_M104/1	650377937
NODE_7532_length_39850_cov_47.644516	39934	3547752	164	18	27	109	Eubacterium_rectale_M104/1	650377937
NODE_7533_length_10060_cov_47.885090	10144	3547752	164	18	27	109	Eubacterium_rectale_M104/1	650377937
NODE_7534_length_10328_cov_47.461269	10412	3547752	164	18	36	109	Eubacterium_rectale_M104/1	650377937
NODE_7535_length_5651_cov_47.453903	5735	3547752	164	18	36	109	Eubacterium_rectale_M104/1	650377937
NODE_7536_length_18367_cov_47.707191	18451	3547752	164	18	0	109	Eubacterium_rectale_M104/1	650377937
NODE_7537_length_51991_cov_47.828758	52075	3547752	164	18	27	109	Eubacterium_rectale_M104/1	650377937
NODE_7538_length_11778_cov_47.654015	11862	3547752	164	18	36	109	Eubacterium_rectale_M104/1	650377937
NODE_7539_length_30686_cov_47.384998	30770	3547752	164	18	27	109	Eubacterium_rectale_M104/1	650377937
NODE_7540_length_3182_cov_47.193275	3266	3547752	164	18	26	109	Eubacterium_rectale_M104/1	650377937
NODE_7542_length_3422_cov_47.215664	3506	3547752	164	18	0	109	Eubacterium_rectale_M104/1	650377937
NODE_7543_length_37480_cov_47.533218	37564	3547752	164	18	26	109	Eubacterium_rectale_M104/1	650377937
NODE_7544_length_903_cov_48.991142	987	3547752	164	18	0	109	Eubacterium_rectale_M104/1	650377937
NODE_7545_length_28645_cov_47.573086	28729	3547752	164	18	27	109	Eubacterium_rectale_M104/1	650377937
NODE_7546_length_24616_cov_47.674316	24700	3547752	164	18	27	109	Eubacterium_rectale_M104/1	650377937
NODE_7547_length_20570_cov_47.885414	20654	3547752	164	18	27	109	Eubacterium_rectale_M104/1	650377937
NODE_7549_length_4877_cov_48.460529	4961	3547752	164	18	27	109	Eubacterium_rectale_M104/1	650377937
NODE_7550_length_5634_cov_47.272984	5718	3547752	164	18	36	109	Eubacterium_rectale_M104/1	650377937
NODE_7553_length_3088_cov_47.348770	3172	3547752	164	18	26	109	Eubacterium_rectale_M104/1	650377937
NODE_7556_length_15281_cov_47.662327	15365	3547752	164	18	0	109	Eubacterium_rectale_M104/1	650377937
NODE_7557_length_2825_cov_47.727432	2909	3547752	164	18	27	109	Eubacterium_rectale_M104/1	650377937
NODE_7558_length_2851_cov_46.878288	2935	3547752	164	18	0	109	Eubacterium_rectale_M104/1	650377937
NODE_7560_length_15523_cov_47.539780	15607	3547752	164	18	27	109	Eubacterium_rectale_M104/1	650377937
NODE_7561_length_7374_cov_48.432060	7458	3547752	164	18	36	109	Eubacterium_rectale_M104/1	650377937
NODE_7562_length_2062_cov_48.634335	2146	3547752	164	18	0	109	Eubacterium_rectale_M104/1	650377937
NODE_7563_length_3286_cov_48.238586	3370	3547752	164	18	0	109	Eubacterium_rectale_M104/1	650377937
NODE_7564_length_2693_cov_48.266617	2777	3547752	164	18	0	109	Eubacterium_rectale_M104/1	650377937
NODE_7565_length_13695_cov_47.034904	13779	3547752	164	18	0	109	Eubacterium_rectale_M104/1	650377937
NODE_7566_length_10124_cov_48.033089	10208	3547752	164	18	0	109	Eubacterium_rectale_M104/1	650377937
NODE_7567_length_18799_cov_47.564713	18883	3547752	164	18	26	109	Eubacterium_rectale_M104/1	650377937
NODE_7569_length_2475_cov_47.197979	2559	3547752	164	18	36	109	Eubacterium_rectale_M104/1	650377937
NODE_7570_length_4506_cov_47.539948	4590	3547752	164	18	0	109	Eubacterium_rectale_M104/1	650377937
NODE_7571_length_11299_cov_48.011593	11383	3547752	164	18	0	109	Eubacterium_rectale_M104/1	650377937
NODE_7572_length_3310_cov_47.105137	3394	3547752	164	18	26	109	Eubacterium_rectale_M104/1	650377937
NODE_7573_length_12383_cov_47.399338	12467	3547752	164	18	27	109	Eubacterium_rectale_M104/1	650377937
NODE_7575_length_2396_cov_48.237480	2480	3547752	164	18	26	109	Eubacterium_rectale_M104/1	650377937
NODE_7576_length_7164_cov_47.450169	7248	3547752	164	18	36	109	Eubacterium_rectale_M104/1	650377937
NODE_7581_length_2387_cov_47.824467	2471	3547752	164	18	26	109	Eubacterium_rectale_M104/1	650377937
NODE_7582_length_13563_cov_46.899063	13647	3547752	164	18	0	109	Eubacterium_rectale_M104/1	650377937
NODE_7584_length_4670_cov_48.148609	4754	3547752	164	18	36	109	Eubacterium_rectale_M104/1	650377937
NODE_7585_length_3386_cov_47.013290	3470	3547752	164	18	26	109	Eubacterium_rectale_M104/1	650377937
NODE_7586_length_444_cov_49.295044	528	3547752	164	18	0	109	Eubacterium_rectale_M104/1	650377937
NODE_7587_length_1410_cov_46.849644	1494	3547752	164	18	0	109	Eubacterium_rectale_M104/1	650377937
NODE_7588_length_682_cov_45.178886	766	3547752	164	18	0	0	Eubacterium_rectale_M104/1	650377937
NODE_7590_length_2783_cov_48.276680	2867	3547752	164	18	0	109	Eubacterium_rectale_M104/1	650377937
NODE_7592_length_2393_cov_48.092354	2477	3547752	164	18	27	109	Eubacterium_rectale_M104/1	650377937
NODE_7593_length_628_cov_47.111465	712	3547752	164	18	0	109	Eubacterium_rectale_M104/1	650377937
NODE_7595_length_1792_cov_48.700336	1876	3547752	164	18	0	109	Eubacterium_rectale_M104/1	650377937
NODE_7603_length_3164_cov_46.946903	3248	3547752	164	18	26	109	Eubacterium_rectale_M104/1	650377937
NODE_7604_length_7409_cov_46.534214	7493	3547752	164	18	26	109	Eubacterium_rectale_M104/1	650377937
NODE_7605_length_2695_cov_48.011501	2779	3547752	164	18	0	109	Eubacterium_rectale_M104/1	650377937
NODE_7609_length_6530_cov_46.999386	6614	3547752	164	18	27	109	Eubacterium_rectale_M104/1	650377937
NODE_7610_length_10001_cov_47.664135	10085	3547752	164	18	0	109	Eubacterium_rectale_M104/1	650377937
NODE_7615_length_7476_cov_48.664928	7560	3547752	164	18	26	109	Eubacterium_rectale_M104/1	650377937
NODE_7617_length_1934_cov_46.871250	2018	3547752	164	18	27	109	Eubacterium_rectale_M104/1	650377937
NODE_7618_length_2963_cov_48.382381	3047	3547752	164	18	26	109	Eubacterium_rectale_M104/1	650377937
NODE_7619_length_2352_cov_46.901787	2436	3547752	164	18	36	109	Eubacterium_rectale_M104/1	650377937
NODE_7620_length_2284_cov_46.643169	2368	3547752	164	18	25	109	Eubacterium_rectale_M104/1	650377937
NODE_7621_length_1150_cov_47.348694	1234	3547752	164	18	0	109	Eubacterium_rectale_M104/1	650377937
NODE_7623_length_571_cov_47.217163	655	3547752	164	18	0	0	Eubacterium_rectale_M104/1	650377937
NODE_7624_length_479_cov_47.206680	563	3547752	164	18	0	0	Eubacterium_rectale_M104/1	650377937
NODE_7625_length_1209_cov_47.504551	1293	3547752	164	18	0	1	Eubacterium_rectale_M104/1	650377937
NODE_7630_length_4961_cov_45.959686	5045	3547752	164	18	36	109	Eubacterium_rectale_M104/1	650377937
NODE_7631_length_1142_cov_47.442207	1226	3547752	164	18	0	109	Eubacterium_rectale_M104/1	650377937
NODE_7632_length_2701_cov_47.386894	2785	3547752	164	18	27	109	Eubacterium_rectale_M104/1	650377937
NODE_7635_length_690_cov_48.085506	774	3547752	164	18	0	109	Eubacterium_rectale_M104/1	650377937
NODE_7643_length_2656_cov_48.446159	2740	3547752	164	18	45	109	Eubacterium_rectale_M104/1	650377937
NODE_7649_length_1249_cov_47.823059	1333	3547752	164	18	0	109	Eubacterium_rectale_M104/1	650377937
NODE_7650_length_654_cov_47.659023	738	3547752	164	18	0	109	Eubacterium_rectale_M104/1	650377937
NODE_7652_length_2369_cov_46.962433	2453	3547752	164	18	26	109	Eubacterium_rectale_M104/1	650377937
NODE_7653_length_3210_cov_47.740189	3294	3547752	164	18	36	109	Eubacterium_rectale_M104/1	650377937
NODE_7659_length_2737_cov_47.312386	2821	3547752	164	18	27	109	Eubacterium_rectale_M104/1	650377937
NODE_7660_length_654_cov_47.600918	738	3547752	164	18	0	0	Eubacterium_rectale_M104/1	650377937
NODE_7661_length_616_cov_49.735390	700	3547752	164	18	0	109	Eubacterium_rectale_M104/1	650377937
NODE_7662_length_3643_cov_47.070271	3727	3547752	164	18	36	109	Eubacterium_rectale_M104/1	650377937
NODE_7670_length_760_cov_47.419735	844	3547752	164	18	0	109	Eubacterium_rectale_M104/1	650377937
NODE_7679_length_2528_cov_47.902294	2612	3547752	164	18	26	109	Eubacterium_rectale_M104/1	650377937
NODE_7682_length_1830_cov_47.297813	1914	3547752	164	18	0	109	Eubacterium_rectale_M104/1	650377937
NODE_7694_length_1499_cov_48.795864	1583	3547752	164	18	0	109	Eubacterium_rectale_M104/1	650377937
NODE_7695_length_740_cov_49.397297	824	3547752	164	18	0	109	Eubacterium_rectale_M104/1	650377937
NODE_7696_length_1465_cov_48.168602	1549	3547752	164	18	0	109	Eubacterium_rectale_M104/1	650377937
NODE_7711_length_459_cov_45.945534	543	3547752	164	18	0	0	Eubacterium_rectale_M104/1	650377937
NODE_7713_length_628_cov_46.125797	712	3547752	164	18	0	0	Eubacterium_rectale_M104/1	650377937
NODE_7715_length_1367_cov_48.376007	1451	3547752	164	18	0	109	Eubacterium_rectale_M104/1	650377937
NODE_7747_length_1196_cov_47.544315	1280	3547752	164	18	0	109	Eubacterium_rectale_M104/1	650377937
NODE_7837_length_535_cov_49.044861	619	3547752	164	18	0	109	Eubacterium_rectale_M104/1	650377937
NODE_7846_length_589_cov_51.477081	673	3547752	164	18	0	0	Eubacterium_rectale_M104/1	650377937
NODE_7894_length_1398_cov_47.802574	1482	3547752	164	18	0	109	Eubacterium_rectale_M104/1	650377937
NODE_6275_length_8573_cov_22.163771	8657	1119852	351	40	14	8	Anaplasma_marginale_str_St_Maries	637000008
NODE_6276_length_12040_cov_21.453239	12124	1119852	351	40	14	8	Anaplasma_marginale_str_St_Maries	637000008
NODE_6277_length_428_cov_31.577103	512	1119852	351	40	0	8	Anaplasma_marginale_str_St_Maries	637000008
NODE_6278_length_8530_cov_20.966471	8614	1119852	351	40	14	8	Anaplasma_marginale_str_St_Maries	637000008
NODE_6279_length_21037_cov_21.149641	21121	1119852	351	40	14	8	Anaplasma_marginale_str_St_Maries	637000008
NODE_6280_length_39036_cov_21.380699	39120	1119852	351	40	14	8	Anaplasma_marginale_str_St_Maries	637000008
NODE_6281_length_4191_cov_22.402290	4275	1119852	351	40	14	8	Anaplasma_marginale_str_St_Maries	637000008
NODE_6284_length_14218_cov_21.938740	14302	1119852	351	40	14	8	Anaplasma_marginale_str_St_Maries	637000008
NODE_6285_length_685_cov_19.592701	769	1119852	351	40	0	8	Anaplasma_marginale_str_St_Maries	637000008
NODE_6286_length_1039_cov_29.897017	1123	1119852	351	40	0	8	Anaplasma_marginale_str_St_Maries	637000008
NODE_6287_length_8020_cov_20.846634	8104	1119852	351	40	0	8	Anaplasma_marginale_str_St_Maries	637000008
NODE_6288_length_627_cov_42.323765	711	1119852	351	40	0	8	Anaplasma_marginale_str_St_Maries	637000008
NODE_6289_length_2653_cov_25.369770	2737	1119852	351	40	14	8	Anaplasma_marginale_str_St_Maries	637000008
NODE_6290_length_42687_cov_21.226814	42771	1119852	351	40	14	8	Anaplasma_marginale_str_St_Maries	637000008
NODE_6291_length_35882_cov_21.420071	35966	1119852	351	40	14	8	Anaplasma_marginale_str_St_Maries	637000008
NODE_6292_length_18093_cov_21.804178	18177	1119852	351	40	14	8	Anaplasma_marginale_str_St_Maries	637000008
NODE_6293_length_3397_cov_22.361496	3481	1119852	351	40	14	8	Anaplasma_marginale_str_St_Maries	637000008
NODE_6294_length_484_cov_32.735538	568	1119852	351	40	0	8	Anaplasma_marginale_str_St_Maries	637000008
NODE_6296_length_648_cov_21.956791	732	1119852	351	40	0	8	Anaplasma_marginale_str_St_Maries	637000008
NODE_6297_length_20108_cov_21.464691	20192	1119852	351	40	14	8	Anaplasma_marginale_str_St_Maries	637000008
NODE_6298_length_18105_cov_21.310799	18189	1119852	351	40	14	8	Anaplasma_marginale_str_St_Maries	637000008
NODE_6299_length_14167_cov_22.487965	14251	1119852	351	40	14	8	Anaplasma_marginale_str_St_Maries	637000008
NODE_6303_length_3705_cov_24.297436	3789	1119852	351	40	14	8	Anaplasma_marginale_str_St_Maries	637000008
NODE_6304_length_35071_cov_21.269169	35155	1119852	351	40	14	8	Anaplasma_marginale_str_St_Maries	637000008
NODE_6305_length_11452_cov_22.193153	11536	1119852	351	40	14	8	Anaplasma_marginale_str_St_Maries	637000008
NODE_6306_length_2949_cov_30.930145	3033	1119852	351	40	14	8	Anaplasma_marginale_str_St_Maries	637000008
NODE_6307_length_2860_cov_21.134966	2944	1119852	351	40	0	8	Anaplasma_marginale_str_St_Maries	637000008
NODE_6308_length_11667_cov_22.284735	11751	1119852	351	40	14	8	Anaplasma_marginale_str_St_Maries	637000008
NODE_6309_length_8641_cov_21.649693	8725	1119852	351	40	0	8	Anaplasma_marginale_str_St_Maries	637000008
NODE_6310_length_5271_cov_22.133751	5355	1119852	351	40	14	8	Anaplasma_marginale_str_St_Maries	637000008
NODE_6311_length_1541_cov_24.170668	1625	1119852	351	40	0	8	Anaplasma_marginale_str_St_Maries	637000008
NODE_6312_length_12573_cov_21.666826	12657	1119852	351	40	14	8	Anaplasma_marginale_str_St_Maries	637000008
NODE_6313_length_14251_cov_21.411058	14335	1119852	351	40	14	8	Anaplasma_marginale_str_St_Maries	637000008
NODE_6316_length_10916_cov_21.250732	11000	1119852	351	40	14	8	Anaplasma_marginale_str_St_Maries	637000008
NODE_6317_length_6208_cov_24.323614	6292	1119852	351	40	14	8	Anaplasma_marginale_str_St_Maries	637000008
NODE_6318_length_1637_cov_18.748932	1721	1119852	351	40	0	8	Anaplasma_marginale_str_St_Maries	637000008
NODE_6319_length_16722_cov_22.443487	16806	1119852	351	40	14	8	Anaplasma_marginale_str_St_Maries	637000008
NODE_6321_length_12450_cov_21.656868	12534	1119852	351	40	14	8	Anaplasma_marginale_str_St_Maries	637000008
NODE_6322_length_15849_cov_23.026941	15933	1119852	351	40	14	8	Anaplasma_marginale_str_St_Maries	637000008
NODE_6324_length_14481_cov_20.866583	14565	1119852	351	40	14	8	Anaplasma_marginale_str_St_Maries	637000008
NODE_6325_length_3296_cov_21.503944	3380	1119852	351	40	14	8	Anaplasma_marginale_str_St_Maries	637000008
NODE_6326_length_450_cov_41.037777	534	1119852	351	40	0	8	Anaplasma_marginale_str_St_Maries	637000008
NODE_6327_length_17727_cov_21.796356	17811	1119852	351	40	14	8	Anaplasma_marginale_str_St_Maries	637000008
NODE_6328_length_20701_cov_21.077484	20785	1119852	351	40	14	8	Anaplasma_marginale_str_St_Maries	637000008
NODE_6329_length_466_cov_41.399143	550	1119852	351	40	0	8	Anaplasma_marginale_str_St_Maries	637000008
NODE_6330_length_11434_cov_21.314850	11518	1119852	351	40	14	8	Anaplasma_marginale_str_St_Maries	637000008
NODE_6332_length_452_cov_20.975664	536	1119852	351	40	0	8	Anaplasma_marginale_str_St_Maries	637000008
NODE_6334_length_19331_cov_21.241995	19415	1119852	351	40	0	8	Anaplasma_marginale_str_St_Maries	637000008
NODE_6335_length_12083_cov_21.381611	12167	1119852	351	40	14	8	Anaplasma_marginale_str_St_Maries	637000008
NODE_6336_length_491_cov_63.694500	575	1119852	351	40	0	8	Anaplasma_marginale_str_St_Maries	637000008
NODE_6338_length_1065_cov_28.111736	1149	1119852	351	40	0	8	Anaplasma_marginale_str_St_Maries	637000008
NODE_6339_length_447_cov_32.496643	531	1119852	351	40	0	8	Anaplasma_marginale_str_St_Maries	637000008
NODE_6342_length_9670_cov_21.636402	9754	1119852	351	40	14	8	Anaplasma_marginale_str_St_Maries	637000008
NODE_6344_length_9938_cov_21.291306	10022	1119852	351	40	14	8	Anaplasma_marginale_str_St_Maries	637000008
NODE_6346_length_19744_cov_21.348562	19828	1119852	351	40	14	8	Anaplasma_marginale_str_St_Maries	637000008
NODE_6347_length_30813_cov_21.241652	30897	1119852	351	40	14	8	Anaplasma_marginale_str_St_Maries	637000008
NODE_6348_length_12257_cov_21.675695	12341	1119852	351	40	14	8	Anaplasma_marginale_str_St_Maries	637000008
NODE_6352_length_6038_cov_21.248924	6122	1119852	351	40	14	8	Anaplasma_marginale_str_St_Maries	637000008
NODE_6353_length_7253_cov_21.379566	7337	1119852	351	40	14	8	Anaplasma_marginale_str_St_Maries	637000008
NODE_6354_length_1013_cov_20.572557	1097	1119852	351	40	0	8	Anaplasma_marginale_str_St_Maries	637000008
NODE_6356_length_7370_cov_22.020760	7454	1119852	351	40	14	8	Anaplasma_marginale_str_St_Maries	637000008
NODE_6357_length_7568_cov_21.195692	7652	1119852	351	40	14	8	Anaplasma_marginale_str_St_Maries	637000008
NODE_6358_length_724_cov_25.515194	808	1119852	351	40	0	8	Anaplasma_marginale_str_St_Maries	637000008
NODE_6359_length_12085_cov_21.647165	12169	1119852	351	40	14	8	Anaplasma_marginale_str_St_Maries	637000008
NODE_6360_length_1600_cov_23.539375	1684	1119852	351	40	0	8	Anaplasma_marginale_str_St_Maries	637000008
NODE_6361_length_637_cov_30.235479	721	1119852	351	40	0	8	Anaplasma_marginale_str_St_Maries	637000008
NODE_6362_length_2626_cov_23.584158	2710	1119852	351	40	14	8	Anaplasma_marginale_str_St_Maries	637000008
NODE_6363_length_6413_cov_22.571184	6497	1119852	351	40	14	8	Anaplasma_marginale_str_St_Maries	637000008
NODE_6366_length_954_cov_22.068134	1038	1119852	351	40	0	8	Anaplasma_marginale_str_St_Maries	637000008
NODE_6368_length_6012_cov_24.257318	6096	1119852	351	40	14	8	Anaplasma_marginale_str_St_Maries	637000008
NODE_6369_length_25456_cov_21.375237	25540	1119852	351	40	0	8	Anaplasma_marginale_str_St_Maries	637000008
NODE_6370_length_1084_cov_20.798893	1168	1119852	351	40	0	8	Anaplasma_marginale_str_St_Maries	637000008
NODE_6371_length_498_cov_30.405622	582	1119852	351	40	0	8	Anaplasma_marginale_str_St_Maries	637000008
NODE_6372_length_562_cov_29.065836	646	1119852	351	40	0	8	Anaplasma_marginale_str_St_Maries	637000008
NODE_6373_length_8502_cov_21.416138	8586	1119852	351	40	14	8	Anaplasma_marginale_str_St_Maries	637000008
NODE_6374_length_434_cov_23.350231	518	1119852	351	40	0	8	Anaplasma_marginale_str_St_Maries	637000008
NODE_6375_length_4345_cov_21.648102	4429	1119852	351	40	0	8	Anaplasma_marginale_str_St_Maries	637000008
NODE_6376_length_3609_cov_24.883347	3693	1119852	351	40	0	8	Anaplasma_marginale_str_St_Maries	637000008
NODE_6377_length_15026_cov_21.125515	15110	1119852	351	40	14	8	Anaplasma_marginale_str_St_Maries	637000008
NODE_6378_length_3733_cov_21.620680	3817	1119852	351	40	14	8	Anaplasma_marginale_str_St_Maries	637000008
NODE_6379_length_558_cov_31.274193	642	1119852	351	40	0	8	Anaplasma_marginale_str_St_Maries	637000008
NODE_6380_length_7211_cov_21.285952	7295	1119852	351	40	0	8	Anaplasma_marginale_str_St_Maries	637000008
NODE_6381_length_2031_cov_22.184639	2115	1119852	351	40	0	8	Anaplasma_marginale_str_St_Maries	637000008
NODE_6383_length_9785_cov_21.680122	9869	1119852	351	40	14	8	Anaplasma_marginale_str_St_Maries	637000008
NODE_6384_length_1149_cov_24.516972	1233	1119852	351	40	0	8	Anaplasma_marginale_str_St_Maries	637000008
NODE_6386_length_777_cov_22.935650	861	1119852	351	40	0	8	Anaplasma_marginale_str_St_Maries	637000008
NODE_6387_length_1168_cov_19.785959	1252	1119852	351	40	0	8	Anaplasma_marginale_str_St_Maries	637000008
NODE_6388_length_7094_cov_23.091768	7178	1119852	351	40	14	8	Anaplasma_marginale_str_St_Maries	637000008
NODE_6389_length_1538_cov_31.863459	1622	1119852	351	40	0	8	Anaplasma_marginale_str_St_Maries	637000008
NODE_6390_length_6080_cov_23.336514	6164	1119852	351	40	14	8	Anaplasma_marginale_str_St_Maries	637000008
NODE_6391_length_759_cov_31.710144	843	1119852	351	40	0	8	Anaplasma_marginale_str_St_Maries	637000008
NODE_6392_length_6694_cov_22.948162	6778	1119852	351	40	14	8	Anaplasma_marginale_str_St_Maries	637000008
NODE_6395_length_1012_cov_25.801384	1096	1119852	351	40	0	8	Anaplasma_marginale_str_St_Maries	637000008
NODE_6396_length_675_cov_29.518518	759	1119852	351	40	0	8	Anaplasma_marginale_str_St_Maries	637000008
NODE_6397_length_573_cov_31.242582	657	1119852	351	40	0	8	Anaplasma_marginale_str_St_Maries	637000008
NODE_6398_length_2361_cov_21.504871	2445	1119852	351	40	14	8	Anaplasma_marginale_str_St_Maries	637000008
NODE_6399_length_1426_cov_29.385695	1510	1119852	351	40	0	8	Anaplasma_marginale_str_St_Maries	637000008
NODE_6400_length_715_cov_31.131468	799	1119852	351	40	0	8	Anaplasma_marginale_str_St_Maries	637000008
NODE_6401_length_1434_cov_29.499302	1518	1119852	351	40	0	8	Anaplasma_marginale_str_St_Maries	637000008
NODE_6402_length_1357_cov_31.412676	1441	1119852	351	40	0	8	Anaplasma_marginale_str_St_Maries	637000008
NODE_6403_length_993_cov_25.597179	1077	1119852	351	40	0	8	Anaplasma_marginale_str_St_Maries	637000008
NODE_6404_length_5926_cov_23.079987	6010	1119852	351	40	14	8	Anaplasma_marginale_str_St_Maries	637000008
NODE_6405_length_562_cov_25.489325	646	1119852	351	40	0	8	Anaplasma_marginale_str_St_Maries	637000008
NODE_6406_length_5431_cov_21.795801	5515	1119852	351	40	14	8	Anaplasma_marginale_str_St_Maries	637000008
NODE_6407_length_2914_cov_30.505148	2998	1119852	351	40	14	8	Anaplasma_marginale_str_St_Maries	637000008
NODE_6408_length_938_cov_30.047974	1022	1119852	351	40	0	8	Anaplasma_marginale_str_St_Maries	637000008
NODE_6409_length_4527_cov_22.555113	4611	1119852	351	40	14	8	Anaplasma_marginale_str_St_Maries	637000008
NODE_6411_length_593_cov_21.276560	677	1119852	351	40	0	8	Anaplasma_marginale_str_St_Maries	637000008
NODE_6413_length_684_cov_24.526316	768	1119852	351	40	0	8	Anaplasma_marginale_str_St_Maries	637000008
NODE_6414_length_752_cov_24.571808	836	1119852	351	40	0	8	Anaplasma_marginale_str_St_Maries	637000008
NODE_6415_length_1484_cov_26.936657	1568	1119852	351	40	0	8	Anaplasma_marginale_str_St_Maries	637000008
NODE_6416_length_1082_cov_30.902033	1166	1119852	351	40	0	8	Anaplasma_marginale_str_St_Maries	637000008
NODE_6417_length_712_cov_29.896067	796	1119852	351	40	0	8	Anaplasma_marginale_str_St_Maries	637000008
NODE_6418_length_824_cov_20.991505	908	1119852	351	40	0	8	Anaplasma_marginale_str_St_Maries	637000008
NODE_6419_length_4116_cov_21.934645	4200	1119852	351	40	14	8	Anaplasma_marginale_str_St_Maries	637000008
NODE_6420_length_1145_cov_22.496943	1229	1119852	351	40	0	8	Anaplasma_marginale_str_St_Maries	637000008
NODE_6421_length_2034_cov_25.041298	2118	1119852	351	40	14	8	Anaplasma_marginale_str_St_Maries	637000008
NODE_6422_length_1406_cov_24.976530	1490	1119852	351	40	0	8	Anaplasma_marginale_str_St_Maries	637000008
NODE_6423_length_4060_cov_21.968473	4144	1119852	351	40	14	8	Anaplasma_marginale_str_St_Maries	637000008
NODE_6428_length_477_cov_21.649895	561	1119852	351	40	0	8	Anaplasma_marginale_str_St_Maries	637000008
NODE_6429_length_2191_cov_30.203560	2275	1119852	351	40	0	8	Anaplasma_marginale_str_St_Maries	637000008
NODE_6431_length_3017_cov_21.694731	3101	1119852	351	40	14	8	Anaplasma_marginale_str_St_Maries	637000008
NODE_6432_length_949_cov_30.380400	1033	1119852	351	40	0	8	Anaplasma_marginale_str_St_Maries	637000008
NODE_6435_length_2718_cov_22.786976	2802	1119852	351	40	14	8	Anaplasma_marginale_str_St_Maries	637000008
NODE_6436_length_4357_cov_21.212072	4441	1119852	351	40	14	8	Anaplasma_marginale_str_St_Maries	637000008
NODE_6438_length_1090_cov_30.382568	1174	1119852	351	40	0	8	Anaplasma_marginale_str_St_Maries	637000008
NODE_6440_length_7680_cov_21.085808	7764	1119852	351	40	14	8	Anaplasma_marginale_str_St_Maries	637000008
NODE_6442_length_7553_cov_21.608368	7637	1119852	351	40	0	8	Anaplasma_marginale_str_St_Maries	637000008
NODE_6443_length_4011_cov_24.299427	4095	1119852	351	40	0	8	Anaplasma_marginale_str_St_Maries	637000008
NODE_6446_length_1217_cov_30.803616	1301	1119852	351	40	0	8	Anaplasma_marginale_str_St_Maries	637000008
NODE_6449_length_1545_cov_24.193527	1629	1119852	351	40	0	8	Anaplasma_marginale_str_St_Maries	637000008
NODE_6453_length_703_cov_23.062590	787	1119852	351	40	0	8	Anaplasma_marginale_str_St_Maries	637000008
NODE_6454_length_730_cov_23.608219	814	1119852	351	40	0	8	Anaplasma_marginale_str_St_Maries	637000008
NODE_6455_length_1136_cov_25.423416	1220	1119852	351	40	0	8	Anaplasma_marginale_str_St_Maries	637000008
NODE_6456_length_2810_cov_21.231318	2894	1119852	351	40	14	8	Anaplasma_marginale_str_St_Maries	637000008
NODE_6459_length_2717_cov_30.969084	2801	1119852	351	40	18	8	Anaplasma_marginale_str_St_Maries	637000008
NODE_6461_length_778_cov_30.341902	862	1119852	351	40	0	8	Anaplasma_marginale_str_St_Maries	637000008
NODE_6462_length_1074_cov_22.458101	1158	1119852	351	40	0	8	Anaplasma_marginale_str_St_Maries	637000008
NODE_6465_length_589_cov_22.964346	673	1119852	351	40	0	8	Anaplasma_marginale_str_St_Maries	637000008
NODE_6466_length_1247_cov_22.004812	1331	1119852	351	40	0	8	Anaplasma_marginale_str_St_Maries	637000008
NODE_6467_length_680_cov_23.122059	764	1119852	351	40	0	8	Anaplasma_marginale_str_St_Maries	637000008
NODE_6469_length_1743_cov_25.012623	1827	1119852	351	40	0	8	Anaplasma_marginale_str_St_Maries	637000008
NODE_6470_length_1990_cov_31.751759	2074	1119852	351	40	14	8	Anaplasma_marginale_str_St_Maries	637000008
NODE_6472_length_618_cov_62.202267	702	1119852	351	40	0	8	Anaplasma_marginale_str_St_Maries	637000008
NODE_6473_length_1244_cov_30.631029	1328	1119852	351	40	0	8	Anaplasma_marginale_str_St_Maries	637000008
NODE_6474_length_1246_cov_21.211075	1330	1119852	351	40	0	8	Anaplasma_marginale_str_St_Maries	637000008
NODE_6476_length_1369_cov_30.553688	1453	1119852	351	40	0	8	Anaplasma_marginale_str_St_Maries	637000008
NODE_6477_length_1631_cov_24.396076	1715	1119852	351	40	0	8	Anaplasma_marginale_str_St_Maries	637000008
NODE_6478_length_1101_cov_30.338783	1185	1119852	351	40	0	8	Anaplasma_marginale_str_St_Maries	637000008
NODE_6479_length_1219_cov_31.175554	1303	1119852	351	40	0	8	Anaplasma_marginale_str_St_Maries	637000008
NODE_6480_length_3296_cov_23.779430	3380	1119852	351	40	0	8	Anaplasma_marginale_str_St_Maries	637000008
NODE_6482_length_8762_cov_21.251997	8846	1119852	351	40	0	8	Anaplasma_marginale_str_St_Maries	637000008
NODE_6483_length_707_cov_43.244698	791	1119852	351	40	0	8	Anaplasma_marginale_str_St_Maries	637000008
NODE_6486_length_792_cov_31.357323	876	1119852	351	40	0	8	Anaplasma_marginale_str_St_Maries	637000008
NODE_6487_length_808_cov_31.653465	892	1119852	351	40	0	8	Anaplasma_marginale_str_St_Maries	637000008
NODE_6488_length_470_cov_30.874468	554	1119852	351	40	0	8	Anaplasma_marginale_str_St_Maries	637000008
NODE_6489_length_538_cov_20.929369	622	1119852	351	40	0	8	Anaplasma_marginale_str_St_Maries	637000008
NODE_6490_length_629_cov_31.748808	713	1119852	351	40	0	8	Anaplasma_marginale_str_St_Maries	637000008
NODE_6493_length_1841_cov_24.583378	1925	1119852	351	40	0	8	Anaplasma_marginale_str_St_Maries	637000008
NODE_6494_length_885_cov_30.711864	969	1119852	351	40	0	8	Anaplasma_marginale_str_St_Maries	637000008
NODE_6495_length_1472_cov_28.969429	1556	1119852	351	40	0	8	Anaplasma_marginale_str_St_Maries	637000008
NODE_6496_length_1027_cov_30.583252	1111	1119852	351	40	0	8	Anaplasma_marginale_str_St_Maries	637000008
NODE_6497_length_620_cov_30.732258	704	1119852	351	40	0	8	Anaplasma_marginale_str_St_Maries	637000008
NODE_6498_length_1623_cov_24.357979	1707	1119852	351	40	0	8	Anaplasma_marginale_str_St_Maries	637000008
NODE_6500_length_1188_cov_21.494949	1272	1119852	351	40	0	8	Anaplasma_marginale_str_St_Maries	637000008
NODE_6501_length_641_cov_30.464899	725	1119852	351	40	0	8	Anaplasma_marginale_str_St_Maries	637000008
NODE_6502_length_1287_cov_21.522921	1371	1119852	351	40	0	8	Anaplasma_marginale_str_St_Maries	637000008
NODE_6503_length_1459_cov_21.485264	1543	1119852	351	40	0	8	Anaplasma_marginale_str_St_Maries	637000008
NODE_6504_length_1602_cov_21.782772	1686	1119852	351	40	0	8	Anaplasma_marginale_str_St_Maries	637000008
NODE_6506_length_1550_cov_23.591614	1634	1119852	351	40	0	8	Anaplasma_marginale_str_St_Maries	637000008
NODE_6507_length_1046_cov_41.734226	1130	1119852	351	40	0	8	Anaplasma_marginale_str_St_Maries	637000008
NODE_6508_length_446_cov_44.594170	530	1119852	351	40	0	8	Anaplasma_marginale_str_St_Maries	637000008
NODE_6511_length_1363_cov_22.888481	1447	1119852	351	40	0	8	Anaplasma_marginale_str_St_Maries	637000008
NODE_6512_length_956_cov_24.142260	1040	1119852	351	40	0	8	Anaplasma_marginale_str_St_Maries	637000008
NODE_6515_length_469_cov_41.292110	553	1119852	351	40	0	8	Anaplasma_marginale_str_St_Maries	637000008
NODE_6516_length_1596_cov_21.471804	1680	1119852	351	40	0	8	Anaplasma_marginale_str_St_Maries	637000008
NODE_6517_length_1587_cov_26.354757	1671	1119852	351	40	0	8	Anaplasma_marginale_str_St_Maries	637000008
NODE_6518_length_1112_cov_29.398382	1196	1119852	351	40	0	8	Anaplasma_marginale_str_St_Maries	637000008
NODE_6520_length_1150_cov_32.210434	1234	1119852	351	40	0	8	Anaplasma_marginale_str_St_Maries	637000008
NODE_6522_length_1202_cov_29.841099	1286	1119852	351	40	0	8	Anaplasma_marginale_str_St_Maries	637000008
NODE_6524_length_3110_cov_23.131512	3194	1119852	351	40	14	8	Anaplasma_marginale_str_St_Maries	637000008
NODE_6525_length_1158_cov_31.132988	1242	1119852	351	40	0	8	Anaplasma_marginale_str_St_Maries	637000008
NODE_6527_length_886_cov_30.454853	970	1119852	351	40	0	8	Anaplasma_marginale_str_St_Maries	637000008
NODE_6530_length_1271_cov_24.636507	1355	1119852	351	40	0	8	Anaplasma_marginale_str_St_Maries	637000008
NODE_6531_length_762_cov_24.338583	846	1119852	351	40	0	8	Anaplasma_marginale_str_St_Maries	637000008
NODE_6532_length_614_cov_32.418568	698	1119852	351	40	0	8	Anaplasma_marginale_str_St_Maries	637000008
NODE_6533_length_1512_cov_30.230158	1596	1119852	351	40	0	8	Anaplasma_marginale_str_St_Maries	637000008
NODE_6534_length_522_cov_22.450191	606	1119852	351	40	0	8	Anaplasma_marginale_str_St_Maries	637000008
NODE_6535_length_461_cov_31.308025	545	1119852	351	40	0	8	Anaplasma_marginale_str_St_Maries	637000008
NODE_6536_length_730_cov_31.563013	814	1119852	351	40	0	8	Anaplasma_marginale_str_St_Maries	637000008
NODE_6537_length_590_cov_21.767797	674	1119852	351	40	0	8	Anaplasma_marginale_str_St_Maries	637000008
NODE_6538_length_3010_cov_30.974751	3094	1119852	351	40	14	8	Anaplasma_marginale_str_St_Maries	637000008
NODE_6539_length_440_cov_31.586363	524	1119852	351	40	0	8	Anaplasma_marginale_str_St_Maries	637000008
NODE_6540_length_2645_cov_23.986012	2729	1119852	351	40	14	8	Anaplasma_marginale_str_St_Maries	637000008
NODE_6541_length_670_cov_31.304478	754	1119852	351	40	0	8	Anaplasma_marginale_str_St_Maries	637000008
NODE_6546_length_830_cov_21.395182	914	1119852	351	40	0	8	Anaplasma_marginale_str_St_Maries	637000008
NODE_6547_length_1193_cov_21.098072	1277	1119852	351	40	0	8	Anaplasma_marginale_str_St_Maries	637000008
NODE_6553_length_860_cov_30.015116	944	1119852	351	40	0	8	Anaplasma_marginale_str_St_Maries	637000008
NODE_6560_length_647_cov_31.454405	731	1119852	351	40	0	8	Anaplasma_marginale_str_St_Maries	637000008
NODE_6561_length_448_cov_20.316965	532	1119852	351	40	0	8	Anaplasma_marginale_str_St_Maries	637000008
NODE_6564_length_1325_cov_23.608301	1409	1119852	351	40	0	8	Anaplasma_marginale_str_St_Maries	637000008
NODE_6566_length_581_cov_29.697075	665	1119852	351	40	0	8	Anaplasma_marginale_str_St_Maries	637000008
NODE_6569_length_2198_cov_24.219290	2282	1119852	351	40	14	8	Anaplasma_marginale_str_St_Maries	637000008
NODE_6570_length_465_cov_31.827957	549	1119852	351	40	0	8	Anaplasma_marginale_str_St_Maries	637000008
NODE_6571_length_436_cov_25.332569	520	1119852	351	40	0	8	Anaplasma_marginale_str_St_Maries	637000008
NODE_6574_length_494_cov_30.765182	578	1119852	351	40	0	8	Anaplasma_marginale_str_St_Maries	637000008
NODE_6575_length_816_cov_26.158089	900	1119852	351	40	0	8	Anaplasma_marginale_str_St_Maries	637000008
NODE_6576_length_2985_cov_22.040537	3069	1119852	351	40	0	8	Anaplasma_marginale_str_St_Maries	637000008
NODE_6578_length_987_cov_29.800406	1071	1119852	351	40	0	8	Anaplasma_marginale_str_St_Maries	637000008
NODE_6584_length_3670_cov_31.166485	3754	1119852	351	40	14	8	Anaplasma_marginale_str_St_Maries	637000008
NODE_6586_length_786_cov_30.449110	870	1119852	351	40	0	8	Anaplasma_marginale_str_St_Maries	637000008
NODE_6587_length_934_cov_20.671307	1018	1119852	351	40	0	8	Anaplasma_marginale_str_St_Maries	637000008
NODE_6592_length_719_cov_29.086231	803	1119852	351	40	0	8	Anaplasma_marginale_str_St_Maries	637000008
NODE_6594_length_1659_cov_23.918022	1743	1119852	351	40	0	8	Anaplasma_marginale_str_St_Maries	637000008
NODE_6598_length_849_cov_20.260305	933	1119852	351	40	0	8	Anaplasma_marginale_str_St_Maries	637000008
NODE_6601_length_509_cov_26.007858	593	1119852	351	40	0	112	Anaplasma_marginale_str_St_Maries	637000008
NODE_6602_length_638_cov_30.120689	722	1119852	351	40	0	8	Anaplasma_marginale_str_St_Maries	637000008
NODE_6603_length_664_cov_24.680723	748	1119852	351	40	0	8	Anaplasma_marginale_str_St_Maries	637000008
NODE_6611_length_996_cov_23.842369	1080	1119852	351	40	0	8	Anaplasma_marginale_str_St_Maries	637000008
NODE_6613_length_534_cov_21.837078	618	1119852	351	40	0	8	Anaplasma_marginale_str_St_Maries	637000008
NODE_6614_length_1016_cov_32.630905	1100	1119852	351	40	0	8	Anaplasma_marginale_str_St_Maries	637000008
NODE_6615_length_427_cov_31.775175	511	1119852	351	40	0	8	Anaplasma_marginale_str_St_Maries	637000008
NODE_6618_length_679_cov_30.399117	763	1119852	351	40	0	8	Anaplasma_marginale_str_St_Maries	637000008
NODE_6620_length_1109_cov_23.778179	1193	1119852	351	40	0	9	Anaplasma_marginale_str_St_Maries	637000008
NODE_6624_length_1302_cov_31.281105	1386	1119852	351	40	0	8	Anaplasma_marginale_str_St_Maries	637000008
NODE_6625_length_631_cov_32.369255	715	1119852	351	40	0	8	Anaplasma_marginale_str_St_Maries	637000008
NODE_6626_length_778_cov_24.401028	862	1119852	351	40	0	8	Anaplasma_marginale_str_St_Maries	637000008
NODE_6627_length_1342_cov_31.451565	1426	1119852	351	40	0	8	Anaplasma_marginale_str_St_Maries	637000008
NODE_6628_length_579_cov_31.576857	663	1119852	351	40	0	8	Anaplasma_marginale_str_St_Maries	637000008
NODE_6629_length_919_cov_26.807400	1003	1119852	351	40	0	8	Anaplasma_marginale_str_St_Maries	637000008
NODE_6634_length_963_cov_26.537903	1047	1119852	351	40	0	8	Anaplasma_marginale_str_St_Maries	637000008
NODE_6637_length_942_cov_30.339703	1026	1119852	351	40	0	8	Anaplasma_marginale_str_St_Maries	637000008
NODE_6639_length_3140_cov_30.198090	3224	1119852	351	40	14	8	Anaplasma_marginale_str_St_Maries	637000008
NODE_6640_length_869_cov_31.994246	953	1119852	351	40	0	8	Anaplasma_marginale_str_St_Maries	637000008
NODE_6642_length_518_cov_30.401545	602	1119852	351	40	0	8	Anaplasma_marginale_str_St_Maries	637000008
NODE_6646_length_464_cov_32.196121	548	1119852	351	40	0	8	Anaplasma_marginale_str_St_Maries	637000008
NODE_6648_length_1543_cov_23.647440	1627	1119852	351	40	0	8	Anaplasma_marginale_str_St_Maries	637000008
NODE_6649_length_795_cov_31.201258	879	1119852	351	40	0	8	Anaplasma_marginale_str_St_Maries	637000008
NODE_6653_length_851_cov_23.815512	935	1119852	351	40	0	8	Anaplasma_marginale_str_St_Maries	637000008
NODE_6654_length_1357_cov_30.274134	1441	1119852	351	40	0	8	Anaplasma_marginale_str_St_Maries	637000008
NODE_6657_length_1237_cov_22.524656	1321	1119852	351	40	0	8	Anaplasma_marginale_str_St_Maries	637000008
NODE_6660_length_432_cov_30.078703	516	1119852	351	40	0	8	Anaplasma_marginale_str_St_Maries	637000008
NODE_6662_length_731_cov_31.060192	815	1119852	351	40	0	8	Anaplasma_marginale_str_St_Maries	637000008
NODE_6664_length_663_cov_24.564102	747	1119852	351	40	0	8	Anaplasma_marginale_str_St_Maries	637000008
NODE_6668_length_601_cov_30.978369	685	1119852	351	40	0	8	Anaplasma_marginale_str_St_Maries	637000008
NODE_6669_length_1128_cov_31.299644	1212	1119852	351	40	0	8	Anaplasma_marginale_str_St_Maries	637000008
NODE_6671_length_530_cov_30.160378	614	1119852	351	40	0	8	Anaplasma_marginale_str_St_Maries	637000008
NODE_6672_length_758_cov_23.166227	842	1119852	351	40	0	8	Anaplasma_marginale_str_St_Maries	637000008
NODE_6673_length_1169_cov_28.713430	1253	1119852	351	40	0	8	Anaplasma_marginale_str_St_Maries	637000008
NODE_6678_length_743_cov_24.024225	827	1119852	351	40	0	8	Anaplasma_marginale_str_St_Maries	637000008
NODE_6679_length_665_cov_21.941353	749	1119852	351	40	0	8	Anaplasma_marginale_str_St_Maries	637000008
NODE_6682_length_788_cov_21.488579	872	1119852	351	40	0	8	Anaplasma_marginale_str_St_Maries	637000008
NODE_6686_length_564_cov_24.026596	648	1119852	351	40	0	8	Anaplasma_marginale_str_St_Maries	637000008
NODE_6691_length_1064_cov_21.404135	1148	1119852	351	40	0	8	Anaplasma_marginale_str_St_Maries	637000008
NODE_6693_length_1088_cov_22.882353	1172	1119852	351	40	0	8	Anaplasma_marginale_str_St_Maries	637000008
NODE_6695_length_2543_cov_30.885569	2627	1119852	351	40	14	8	Anaplasma_marginale_str_St_Maries	637000008
NODE_6697_length_1023_cov_31.710655	1107	1119852	351	40	0	8	Anaplasma_marginale_str_St_Maries	637000008
NODE_6698_length_1287_cov_31.017872	1371	1119852	351	40	0	8	Anaplasma_marginale_str_St_Maries	637000008
NODE_6699_length_639_cov_24.502348	723	1119852	351	40	0	8	Anaplasma_marginale_str_St_Maries	637000008
NODE_6700_length_848_cov_31.825472	932	1119852	351	40	0	8	Anaplasma_marginale_str_St_Maries	637000008
NODE_6701_length_950_cov_23.731579	1034	1119852	351	40	0	8	Anaplasma_marginale_str_St_Maries	637000008
NODE_6702_length_428_cov_22.464952	512	1119852	351	40	0	8	Anaplasma_marginale_str_St_Maries	637000008
NODE_6703_length_601_cov_30.306156	685	1119852	351	40	0	8	Anaplasma_marginale_str_St_Maries	637000008
NODE_6705_length_686_cov_25.887754	770	1119852	351	40	0	8	Anaplasma_marginale_str_St_Maries	637000008
NODE_6707_length_837_cov_31.295101	921	1119852	351	40	0	8	Anaplasma_marginale_str_St_Maries	637000008
NODE_6708_length_438_cov_30.666666	522	1119852	351	40	0	8	Anaplasma_marginale_str_St_Maries	637000008
NODE_6710_length_582_cov_29.305841	666	1119852	351	40	0	8	Anaplasma_marginale_str_St_Maries	637000008
NODE_6711_length_556_cov_22.496403	640	1119852	351	40	0	8	Anaplasma_marginale_str_St_Maries	637000008
NODE_6715_length_553_cov_27.390596	637	1119852	351	40	0	8	Anaplasma_marginale_str_St_Maries	637000008
NODE_6721_length_1330_cov_29.775940	1414	1119852	351	40	0	8	Anaplasma_marginale_str_St_Maries	637000008
NODE_6722_length_997_cov_43.499500	1081	1119852	351	40	0	8	Anaplasma_marginale_str_St_Maries	637000008
NODE_6723_length_580_cov_31.337931	664	1119852	351	40	0	8	Anaplasma_marginale_str_St_Maries	637000008
NODE_6725_length_608_cov_29.713816	692	1119852	351	40	0	8	Anaplasma_marginale_str_St_Maries	637000008
NODE_6728_length_636_cov_30.084906	720	1119852	351	40	0	8	Anaplasma_marginale_str_St_Maries	637000008
NODE_6729_length_800_cov_31.107500	884	1119852	351	40	0	8	Anaplasma_marginale_str_St_Maries	637000008
NODE_6735_length_692_cov_29.907515	776	1119852	351	40	0	8	Anaplasma_marginale_str_St_Maries	637000008
NODE_6736_length_532_cov_30.109022	616	1119852	351	40	0	8	Anaplasma_marginale_str_St_Maries	637000008
NODE_6739_length_866_cov_31.292149	950	1119852	351	40	0	8	Anaplasma_marginale_str_St_Maries	637000008
NODE_6740_length_1415_cov_21.108128	1499	1119852	351	40	0	8	Anaplasma_marginale_str_St_Maries	637000008
NODE_6743_length_1076_cov_31.278811	1160	1119852	351	40	0	8	Anaplasma_marginale_str_St_Maries	637000008
NODE_6746_length_1123_cov_31.422974	1207	1119852	351	40	0	8	Anaplasma_marginale_str_St_Maries	637000008
NODE_6748_length_723_cov_31.810513	807	1119852	351	40	0	8	Anaplasma_marginale_str_St_Maries	637000008
NODE_6751_length_446_cov_29.215246	530	1119852	351	40	0	8	Anaplasma_marginale_str_St_Maries	637000008
NODE_6754_length_1066_cov_25.514071	1150	1119852	351	40	0	8	Anaplasma_marginale_str_St_Maries	637000008
NODE_6760_length_495_cov_31.103031	579	1119852	351	40	0	8	Anaplasma_marginale_str_St_Maries	637000008
NODE_6761_length_443_cov_29.740406	527	1119852	351	40	0	8	Anaplasma_marginale_str_St_Maries	637000008
NODE_6763_length_1088_cov_29.990808	1172	1119852	351	40	0	8	Anaplasma_marginale_str_St_Maries	637000008
NODE_6764_length_496_cov_31.510080	580	1119852	351	40	0	8	Anaplasma_marginale_str_St_Maries	637000008
NODE_6770_length_518_cov_29.391891	602	1119852	351	40	0	8	Anaplasma_marginale_str_St_Maries	637000008
NODE_6778_length_734_cov_29.783379	818	1119852	351	40	0	8	Anaplasma_marginale_str_St_Maries	637000008
NODE_6780_length_1417_cov_31.652082	1501	1119852	351	40	0	8	Anaplasma_marginale_str_St_Maries	637000008
NODE_6784_length_819_cov_30.522589	903	1119852	351	40	0	8	Anaplasma_marginale_str_St_Maries	637000008
NODE_6787_length_575_cov_31.413914	659	1119852	351	40	0	8	Anaplasma_marginale_str_St_Maries	637000008
NODE_6794_length_554_cov_30.880867	638	1119852	351	40	0	8	Anaplasma_marginale_str_St_Maries	637000008
NODE_6795_length_684_cov_31.440058	768	1119852	351	40	0	8	Anaplasma_marginale_str_St_Maries	637000008
NODE_6799_length_2143_cov_30.315912	2227	1119852	351	40	14	8	Anaplasma_marginale_str_St_Maries	637000008
NODE_6804_length_705_cov_33.443970	789	1119852	351	40	0	8	Anaplasma_marginale_str_St_Maries	637000008
NODE_6808_length_1190_cov_31.191597	1274	1119852	351	40	0	8	Anaplasma_marginale_str_St_Maries	637000008
NODE_6812_length_494_cov_31.159920	578	1119852	351	40	0	8	Anaplasma_marginale_str_St_Maries	637000008
NODE_6813_length_1067_cov_30.112465	1151	1119852	351	40	0	8	Anaplasma_marginale_str_St_Maries	637000008
NODE_6816_length_1159_cov_30.886108	1243	1119852	351	40	0	8	Anaplasma_marginale_str_St_Maries	637000008
NODE_6818_length_682_cov_31.872435	766	1119852	351	40	0	8	Anaplasma_marginale_str_St_Maries	637000008
NODE_6819_length_680_cov_29.905882	764	1119852	351	40	0	8	Anaplasma_marginale_str_St_Maries	637000008
NODE_6822_length_643_cov_30.138414	727	1119852	351	40	0	8	Anaplasma_marginale_str_St_Maries	637000008
NODE_6823_length_722_cov_31.024931	806	1119852	351	40	0	8	Anaplasma_marginale_str_St_Maries	637000008
NODE_6825_length_626_cov_30.900959	710	1119852	351	40	0	8	Anaplasma_marginale_str_St_Maries	637000008
NODE_6826_length_1224_cov_30.740196	1308	1119852	351	40	0	8	Anaplasma_marginale_str_St_Maries	637000008
NODE_6827_length_1798_cov_31.778643	1882	1119852	351	40	0	8	Anaplasma_marginale_str_St_Maries	637000008
NODE_6828_length_2210_cov_29.683258	2294	1119852	351	40	14	8	Anaplasma_marginale_str_St_Maries	637000008
NODE_6831_length_836_cov_29.730862	920	1119852	351	40	0	8	Anaplasma_marginale_str_St_Maries	637000008
NODE_6833_length_2388_cov_31.384003	2472	1119852	351	40	0	8	Anaplasma_marginale_str_St_Maries	637000008
NODE_6834_length_421_cov_31.344418	505	1119852	351	40	0	8	Anaplasma_marginale_str_St_Maries	637000008
NODE_6835_length_1200_cov_31.065834	1284	1119852	351	40	0	8	Anaplasma_marginale_str_St_Maries	637000008
NODE_6839_length_1243_cov_29.506033	1327	1119852	351	40	0	8	Anaplasma_marginale_str_St_Maries	637000008
NODE_6843_length_680_cov_29.791176	764	1119852	351	40	0	8	Anaplasma_marginale_str_St_Maries	637000008
NODE_6844_length_446_cov_30.363228	530	1119852	351	40	0	8	Anaplasma_marginale_str_St_Maries	637000008
NODE_6853_length_3101_cov_31.188004	3185	1119852	351	40	14	8	Anaplasma_marginale_str_St_Maries	637000008
NODE_6860_length_1121_cov_30.913469	1205	1119852	351	40	0	8	Anaplasma_marginale_str_St_Maries	637000008
NODE_6867_length_553_cov_21.728752	637	1119852	351	40	0	8	Anaplasma_marginale_str_St_Maries	637000008
NODE_6868_length_531_cov_30.640301	615	1119852	351	40	0	8	Anaplasma_marginale_str_St_Maries	637000008
NODE_6870_length_1942_cov_31.438208	2026	1119852	351	40	14	8	Anaplasma_marginale_str_St_Maries	637000008
NODE_6871_length_2286_cov_31.386702	2370	1119852	351	40	0	8	Anaplasma_marginale_str_St_Maries	637000008
NODE_6874_length_1558_cov_31.069962	1642	1119852	351	40	0	8	Anaplasma_marginale_str_St_Maries	637000008
NODE_6875_length_488_cov_31.518442	572	1119852	351	40	0	8	Anaplasma_marginale_str_St_Maries	637000008
NODE_6879_length_683_cov_43.825768	767	1119852	351	40	0	8	Anaplasma_marginale_str_St_Maries	637000008
NODE_6887_length_1320_cov_30.256062	1404	1119852	351	40	0	8	Anaplasma_marginale_str_St_Maries	637000008
NODE_6891_length_571_cov_26.492119	655	1119852	351	40	0	8	Anaplasma_marginale_str_St_Maries	637000008
NODE_6914_length_935_cov_30.420321	1019	1119852	351	40	0	8	Anaplasma_marginale_str_St_Maries	637000008
NODE_6921_length_611_cov_30.628477	695	1119852	351	40	0	8	Anaplasma_marginale_str_St_Maries	637000008
NODE_6928_length_632_cov_30.830696	716	1119852	351	40	0	8	Anaplasma_marginale_str_St_Maries	637000008
NODE_6942_length_1097_cov_31.765724	1181	1119852	351	40	0	8	Anaplasma_marginale_str_St_Maries	637000008
NODE_6951_length_463_cov_31.168467	547	1119852	351	40	0	8	Anaplasma_marginale_str_St_Maries	637000008
NODE_6955_length_658_cov_31.384499	742	1119852	351	40	0	8	Anaplasma_marginale_str_St_Maries	637000008
NODE_6957_length_595_cov_31.875629	679	1119852	351	40	0	8	Anaplasma_marginale_str_St_Maries	637000008
NODE_6958_length_436_cov_31.525229	520	1119852	351	40	0	8	Anaplasma_marginale_str_St_Maries	637000008
NODE_6966_length_854_cov_29.989462	938	1119852	351	40	0	8	Anaplasma_marginale_str_St_Maries	637000008
NODE_6968_length_1834_cov_30.386587	1918	1119852	351	40	0	8	Anaplasma_marginale_str_St_Maries	637000008
NODE_6970_length_817_cov_30.723379	901	1119852	351	40	0	8	Anaplasma_marginale_str_St_Maries	637000008
NODE_6971_length_548_cov_29.031021	632	1119852	351	40	0	8	Anaplasma_marginale_str_St_Maries	637000008
NODE_6976_length_489_cov_30.368097	573	1119852	351	40	0	8	Anaplasma_marginale_str_St_Maries	637000008
NODE_6980_length_431_cov_30.656612	515	1119852	351	40	0	8	Anaplasma_marginale_str_St_Maries	637000008
NODE_6985_length_716_cov_29.731844	800	1119852	351	40	0	8	Anaplasma_marginale_str_St_Maries	637000008
NODE_6987_length_797_cov_30.262234	881	1119852	351	40	0	8	Anaplasma_marginale_str_St_Maries	637000008
NODE_6989_length_526_cov_30.910646	610	1119852	351	40	0	8	Anaplasma_marginale_str_St_Maries	637000008
NODE_6993_length_625_cov_31.411200	709	1119852	351	40	0	8	Anaplasma_marginale_str_St_Maries	637000008
NODE_7005_length_1792_cov_32.075336	1876	1119852	351	40	0	8	Anaplasma_marginale_str_St_Maries	637000008
NODE_7008_length_449_cov_31.561247	533	1119852	351	40	0	8	Anaplasma_marginale_str_St_Maries	637000008
NODE_7013_length_467_cov_29.173447	551	1119852	351	40	0	8	Anaplasma_marginale_str_St_Maries	637000008
NODE_7014_length_677_cov_30.197931	761	1119852	351	40	0	8	Anaplasma_marginale_str_St_Maries	637000008
NODE_7015_length_1070_cov_31.919626	1154	1119852	351	40	0	8	Anaplasma_marginale_str_St_Maries	637000008
NODE_7016_length_1016_cov_29.328741	1100	1119852	351	40	0	8	Anaplasma_marginale_str_St_Maries	637000008
NODE_100_length_48796_cov_30.917473	48880	3109577	151	21	25	11	Methanoplanus_limicola_M3_DSM_2279_Contig423	2506381025
NODE_101_length_9435_cov_30.864122	9519	3109577	151	21	25	11	Methanoplanus_limicola_M3_DSM_2279_Contig423	2506381025
NODE_102_length_3453_cov_30.623806	3537	3109577	151	21	25	11	Methanoplanus_limicola_M3_DSM_2279_Contig423	2506381025
NODE_106_length_39879_cov_31.074450	39963	3109577	151	21	25	11	Methanoplanus_limicola_M3_DSM_2279_Contig423	2506381025
NODE_107_length_7373_cov_30.947783	7457	3109577	151	21	25	11	Methanoplanus_limicola_M3_DSM_2279_Contig423	2506381025
NODE_108_length_17322_cov_30.891237	17406	3109577	151	21	25	11	Methanoplanus_limicola_M3_DSM_2279_Contig423	2506381025
NODE_109_length_6894_cov_30.952423	6978	3109577	151	21	25	11	Methanoplanus_limicola_M3_DSM_2279_Contig423	2506381025
NODE_110_length_2154_cov_30.201021	2238	3109577	151	21	25	11	Methanoplanus_limicola_M3_DSM_2279_Contig423	2506381025
NODE_111_length_12625_cov_30.884119	12709	3109577	151	21	25	11	Methanoplanus_limicola_M3_DSM_2279_Contig423	2506381025
NODE_112_length_2084_cov_31.694338	2168	3109577	151	21	25	11	Methanoplanus_limicola_M3_DSM_2279_Contig423	2506381025
NODE_113_length_3608_cov_31.665466	3692	3109577	151	21	25	11	Methanoplanus_limicola_M3_DSM_2279_Contig423	2506381025
NODE_114_length_2282_cov_31.185802	2366	3109577	151	21	25	11	Methanoplanus_limicola_M3_DSM_2279_Contig423	2506381025
NODE_115_length_7525_cov_30.839336	7609	3109577	151	21	0	11	Methanoplanus_limicola_M3_DSM_2279_Contig423	2506381025
NODE_11582_length_421_cov_32.843231	505	3109577	151	21	0	11	Methanoplanus_limicola_M3_DSM_2279_Contig423	2506381025
NODE_11586_length_670_cov_32.034328	754	3109577	151	21	0	11	Methanoplanus_limicola_M3_DSM_2279_Contig423	2506381025
NODE_11595_length_2496_cov_30.772036	2580	3109577	151	21	25	11	Methanoplanus_limicola_M3_DSM_2279_Contig423	2506381025
NODE_11599_length_692_cov_32.963871	776	3109577	151	21	0	11	Methanoplanus_limicola_M3_DSM_2279_Contig423	2506381025
NODE_116_length_16779_cov_30.965254	16863	3109577	151	21	25	11	Methanoplanus_limicola_M3_DSM_2279_Contig423	2506381025
NODE_11600_length_552_cov_60.914856	636	3109577	151	21	0	0	Methanoplanus_limicola_M3_DSM_2279_Contig423	2506381025
NODE_11605_length_459_cov_60.594772	543	3109577	151	21	0	0	Methanoplanus_limicola_M3_DSM_2279_Contig423	2506381025
NODE_11634_length_676_cov_59.829880	760	3109577	151	21	0	0	Methanoplanus_limicola_M3_DSM_2279_Contig423	2506381025
NODE_11641_length_1051_cov_59.936253	1135	3109577	151	21	0	0	Methanoplanus_limicola_M3_DSM_2279_Contig423	2506381025
NODE_11645_length_2283_cov_30.781427	2367	3109577	151	21	25	11	Methanoplanus_limicola_M3_DSM_2279_Contig423	2506381025
NODE_11648_length_1704_cov_60.383217	1788	3109577	151	21	0	0	Methanoplanus_limicola_M3_DSM_2279_Contig423	2506381025
NODE_11652_length_512_cov_62.142578	596	3109577	151	21	0	0	Methanoplanus_limicola_M3_DSM_2279_Contig423	2506381025
NODE_11656_length_628_cov_28.054140	712	3109577	151	21	0	0	Methanoplanus_limicola_M3_DSM_2279_Contig423	2506381025
NODE_11668_length_462_cov_60.653679	546	3109577	151	21	0	0	Methanoplanus_limicola_M3_DSM_2279_Contig423	2506381025
NODE_11682_length_1109_cov_31.084761	1193	3109577	151	21	0	11	Methanoplanus_limicola_M3_DSM_2279_Contig423	2506381025
NODE_117_length_8211_cov_30.386555	8295	3109577	151	21	25	11	Methanoplanus_limicola_M3_DSM_2279_Contig423	2506381025
NODE_11767_length_980_cov_39.796940	1064	3109577	151	21	0	0	Methanoplanus_limicola_M3_DSM_2279_Contig423	2506381025
NODE_11776_length_462_cov_30.632034	546	3109577	151	21	0	0	Methanoplanus_limicola_M3_DSM_2279_Contig423	2506381025
NODE_11794_length_598_cov_121.968231	682	3109577	151	21	0	0	Methanoplanus_limicola_M3_DSM_2279_Contig423	2506381025
NODE_118_length_14698_cov_30.765751	14782	3109577	151	21	25	11	Methanoplanus_limicola_M3_DSM_2279_Contig423	2506381025
NODE_11821_length_556_cov_31.329136	640	3109577	151	21	0	0	Methanoplanus_limicola_M3_DSM_2279_Contig423	2506381025
NODE_119_length_31595_cov_30.949265	31679	3109577	151	21	25	11	Methanoplanus_limicola_M3_DSM_2279_Contig423	2506381025
NODE_120_length_15153_cov_30.726259	15237	3109577	151	21	0	11	Methanoplanus_limicola_M3_DSM_2279_Contig423	2506381025
NODE_121_length_7434_cov_30.761635	7518	3109577	151	21	0	11	Methanoplanus_limicola_M3_DSM_2279_Contig423	2506381025
NODE_122_length_917_cov_31.557251	1001	3109577	151	21	0	11	Methanoplanus_limicola_M3_DSM_2279_Contig423	2506381025
NODE_123_length_23686_cov_30.750738	23770	3109577	151	21	25	11	Methanoplanus_limicola_M3_DSM_2279_Contig423	2506381025
NODE_125_length_13636_cov_30.577662	13720	3109577	151	21	25	11	Methanoplanus_limicola_M3_DSM_2279_Contig423	2506381025
NODE_126_length_755_cov_29.701986	839	3109577	151	21	0	11	Methanoplanus_limicola_M3_DSM_2279_Contig423	2506381025
NODE_127_length_2878_cov_31.315844	2962	3109577	151	21	0	11	Methanoplanus_limicola_M3_DSM_2279_Contig423	2506381025
NODE_128_length_4274_cov_30.924894	4358	3109577	151	21	25	11	Methanoplanus_limicola_M3_DSM_2279_Contig423	2506381025
NODE_129_length_2019_cov_31.479940	2103	3109577	151	21	25	11	Methanoplanus_limicola_M3_DSM_2279_Contig423	2506381025
NODE_130_length_2924_cov_31.043091	3008	3109577	151	21	0	11	Methanoplanus_limicola_M3_DSM_2279_Contig423	2506381025
NODE_131_length_2628_cov_30.589802	2712	3109577	151	21	26	11	Methanoplanus_limicola_M3_DSM_2279_Contig423	2506381025
NODE_132_length_3258_cov_31.522406	3342	3109577	151	21	25	11	Methanoplanus_limicola_M3_DSM_2279_Contig423	2506381025
NODE_133_length_5688_cov_30.671413	5772	3109577	151	21	25	11	Methanoplanus_limicola_M3_DSM_2279_Contig423	2506381025
NODE_134_length_11846_cov_30.638527	11930	3109577	151	21	25	11	Methanoplanus_limicola_M3_DSM_2279_Contig423	2506381025
NODE_135_length_5385_cov_31.590158	5469	3109577	151	21	25	11	Methanoplanus_limicola_M3_DSM_2279_Contig423	2506381025
NODE_136_length_2706_cov_30.107170	2790	3109577	151	21	25	11	Methanoplanus_limicola_M3_DSM_2279_Contig423	2506381025
NODE_137_length_6437_cov_31.103775	6521	3109577	151	21	25	11	Methanoplanus_limicola_M3_DSM_2279_Contig423	2506381025
NODE_138_length_3754_cov_31.313532	3838	3109577	151	21	25	11	Methanoplanus_limicola_M3_DSM_2279_Contig423	2506381025
NODE_139_length_7821_cov_30.621021	7905	3109577	151	21	0	11	Methanoplanus_limicola_M3_DSM_2279_Contig423	2506381025
NODE_140_length_1915_cov_31.149870	1999	3109577	151	21	0	11	Methanoplanus_limicola_M3_DSM_2279_Contig423	2506381025
NODE_141_length_2395_cov_31.106472	2479	3109577	151	21	25	11	Methanoplanus_limicola_M3_DSM_2279_Contig423	2506381025
NODE_142_length_2157_cov_30.900787	2241	3109577	151	21	26	11	Methanoplanus_limicola_M3_DSM_2279_Contig423	2506381025
NODE_143_length_13860_cov_30.753391	13944	3109577	151	21	25	11	Methanoplanus_limicola_M3_DSM_2279_Contig423	2506381025
NODE_144_length_2969_cov_30.995621	3053	3109577	151	21	0	11	Methanoplanus_limicola_M3_DSM_2279_Contig423	2506381025
NODE_145_length_2495_cov_29.897394	2579	3109577	151	21	25	11	Methanoplanus_limicola_M3_DSM_2279_Contig423	2506381025
NODE_146_length_3420_cov_30.692982	3504	3109577	151	21	25	11	Methanoplanus_limicola_M3_DSM_2279_Contig423	2506381025
NODE_147_length_3061_cov_31.481215	3145	3109577	151	21	0	11	Methanoplanus_limicola_M3_DSM_2279_Contig423	2506381025
NODE_148_length_2661_cov_30.258549	2745	3109577	151	21	25	11	Methanoplanus_limicola_M3_DSM_2279_Contig423	2506381025
NODE_149_length_3097_cov_31.062963	3181	3109577	151	21	25	11	Methanoplanus_limicola_M3_DSM_2279_Contig423	2506381025
NODE_150_length_5087_cov_30.415176	5171	3109577	151	21	0	11	Methanoplanus_limicola_M3_DSM_2279_Contig423	2506381025
NODE_152_length_4127_cov_30.759874	4211	3109577	151	21	25	11	Methanoplanus_limicola_M3_DSM_2279_Contig423	2506381025
NODE_153_length_2893_cov_30.706879	2977	3109577	151	21	25	11	Methanoplanus_limicola_M3_DSM_2279_Contig423	2506381025
NODE_155_length_2093_cov_30.989489	2177	3109577	151	21	0	11	Methanoplanus_limicola_M3_DSM_2279_Contig423	2506381025
NODE_158_length_1277_cov_30.759592	1361	3109577	151	21	0	11	Methanoplanus_limicola_M3_DSM_2279_Contig423	2506381025
NODE_159_length_973_cov_30.337101	1057	3109577	151	21	0	11	Methanoplanus_limicola_M3_DSM_2279_Contig423	2506381025
NODE_161_length_3161_cov_30.875988	3245	3109577	151	21	25	11	Methanoplanus_limicola_M3_DSM_2279_Contig423	2506381025
NODE_162_length_2357_cov_30.005091	2441	3109577	151	21	25	11	Methanoplanus_limicola_M3_DSM_2279_Contig423	2506381025
NODE_165_length_545_cov_30.168808	629	3109577	151	21	0	11	Methanoplanus_limicola_M3_DSM_2279_Contig423	2506381025
NODE_166_length_1425_cov_30.273684	1509	3109577	151	21	0	11	Methanoplanus_limicola_M3_DSM_2279_Contig423	2506381025
NODE_167_length_2430_cov_30.383127	2514	3109577	151	21	25	11	Methanoplanus_limicola_M3_DSM_2279_Contig423	2506381025
NODE_168_length_7370_cov_30.363907	7454	3109577	151	21	25	11	Methanoplanus_limicola_M3_DSM_2279_Contig423	2506381025
NODE_170_length_1653_cov_31.217180	1737	3109577	151	21	0	11	Methanoplanus_limicola_M3_DSM_2279_Contig423	2506381025
NODE_174_length_538_cov_30.104090	622	3109577	151	21	0	11	Methanoplanus_limicola_M3_DSM_2279_Contig423	2506381025
NODE_175_length_2604_cov_30.956606	2688	3109577	151	21	0	11	Methanoplanus_limicola_M3_DSM_2279_Contig423	2506381025
NODE_179_length_794_cov_33.079346	878	3109577	151	21	0	11	Methanoplanus_limicola_M3_DSM_2279_Contig423	2506381025
NODE_184_length_1003_cov_30.088734	1087	3109577	151	21	0	11	Methanoplanus_limicola_M3_DSM_2279_Contig423	2506381025
NODE_185_length_1020_cov_32.787254	1104	3109577	151	21	0	11	Methanoplanus_limicola_M3_DSM_2279_Contig423	2506381025
NODE_186_length_1010_cov_30.057426	1094	3109577	151	21	0	11	Methanoplanus_limicola_M3_DSM_2279_Contig423	2506381025
NODE_187_length_1293_cov_30.341066	1377	3109577	151	21	0	11	Methanoplanus_limicola_M3_DSM_2279_Contig423	2506381025
NODE_188_length_543_cov_32.180477	627	3109577	151	21	0	11	Methanoplanus_limicola_M3_DSM_2279_Contig423	2506381025
NODE_189_length_613_cov_28.654160	697	3109577	151	21	0	0	Methanoplanus_limicola_M3_DSM_2279_Contig423	2506381025
NODE_191_length_2215_cov_30.695259	2299	3109577	151	21	25	11	Methanoplanus_limicola_M3_DSM_2279_Contig423	2506381025
NODE_194_length_1314_cov_29.644596	1398	3109577	151	21	0	11	Methanoplanus_limicola_M3_DSM_2279_Contig423	2506381025
NODE_198_length_1489_cov_31.370718	1573	3109577	151	21	0	11	Methanoplanus_limicola_M3_DSM_2279_Contig423	2506381025
NODE_202_length_2271_cov_29.877146	2355	3109577	151	21	0	11	Methanoplanus_limicola_M3_DSM_2279_Contig423	2506381025
NODE_206_length_540_cov_31.692593	624	3109577	151	21	0	11	Methanoplanus_limicola_M3_DSM_2279_Contig423	2506381025
NODE_38_length_27110_cov_30.374805	27194	3109577	151	21	25	11	Methanoplanus_limicola_M3_DSM_2279_Contig423	2506381025
NODE_39_length_93435_cov_30.744625	93519	3109577	151	21	25	11	Methanoplanus_limicola_M3_DSM_2279_Contig423	2506381025
NODE_40_length_93539_cov_31.046354	93623	3109577	151	21	25	11	Methanoplanus_limicola_M3_DSM_2279_Contig423	2506381025
NODE_41_length_107848_cov_30.879313	107932	3109577	151	21	25	11	Methanoplanus_limicola_M3_DSM_2279_Contig423	2506381025
NODE_42_length_101768_cov_31.020615	101852	3109577	151	21	25	11	Methanoplanus_limicola_M3_DSM_2279_Contig423	2506381025
NODE_43_length_91160_cov_30.828665	91244	3109577	151	21	25	11	Methanoplanus_limicola_M3_DSM_2279_Contig423	2506381025
NODE_44_length_32658_cov_30.935606	32742	3109577	151	21	25	11	Methanoplanus_limicola_M3_DSM_2279_Contig423	2506381025
NODE_45_length_130086_cov_30.831135	130170	3109577	151	21	25	11	Methanoplanus_limicola_M3_DSM_2279_Contig423	2506381025
NODE_46_length_12616_cov_30.360495	12700	3109577	151	21	25	11	Methanoplanus_limicola_M3_DSM_2279_Contig423	2506381025
NODE_47_length_44992_cov_30.693546	45076	3109577	151	21	25	11	Methanoplanus_limicola_M3_DSM_2279_Contig423	2506381025
NODE_48_length_70304_cov_30.967812	70388	3109577	151	21	25	11	Methanoplanus_limicola_M3_DSM_2279_Contig423	2506381025
NODE_49_length_28465_cov_30.803198	28549	3109577	151	21	25	11	Methanoplanus_limicola_M3_DSM_2279_Contig423	2506381025
NODE_51_length_70175_cov_30.680740	70259	3109577	151	21	25	11	Methanoplanus_limicola_M3_DSM_2279_Contig423	2506381025
NODE_52_length_63334_cov_30.691620	63418	3109577	151	21	25	11	Methanoplanus_limicola_M3_DSM_2279_Contig423	2506381025
NODE_53_length_46404_cov_30.580208	46488	3109577	151	21	25	11	Methanoplanus_limicola_M3_DSM_2279_Contig423	2506381025
NODE_54_length_68686_cov_30.889627	68770	3109577	151	21	25	11	Methanoplanus_limicola_M3_DSM_2279_Contig423	2506381025
NODE_55_length_25578_cov_30.751310	25662	3109577	151	21	0	11	Methanoplanus_limicola_M3_DSM_2279_Contig423	2506381025
NODE_57_length_30599_cov_30.832806	30683	3109577	151	21	25	11	Methanoplanus_limicola_M3_DSM_2279_Contig423	2506381025
NODE_58_length_152233_cov_30.783201	152317	3109577	151	21	25	11	Methanoplanus_limicola_M3_DSM_2279_Contig423	2506381025
NODE_59_length_8348_cov_30.813129	8432	3109577	151	21	25	11	Methanoplanus_limicola_M3_DSM_2279_Contig423	2506381025
NODE_60_length_39189_cov_30.831944	39273	3109577	151	21	25	11	Methanoplanus_limicola_M3_DSM_2279_Contig423	2506381025
NODE_61_length_79275_cov_30.969524	79359	3109577	151	21	25	11	Methanoplanus_limicola_M3_DSM_2279_Contig423	2506381025
NODE_62_length_68880_cov_30.812485	68964	3109577	151	21	25	11	Methanoplanus_limicola_M3_DSM_2279_Contig423	2506381025
NODE_63_length_83632_cov_30.904211	83716	3109577	151	21	25	11	Methanoplanus_limicola_M3_DSM_2279_Contig423	2506381025
NODE_64_length_81654_cov_30.784786	81738	3109577	151	21	25	11	Methanoplanus_limicola_M3_DSM_2279_Contig423	2506381025
NODE_65_length_13457_cov_30.930222	13541	3109577	151	21	25	11	Methanoplanus_limicola_M3_DSM_2279_Contig423	2506381025
NODE_66_length_47775_cov_31.051785	47859	3109577	151	21	25	11	Methanoplanus_limicola_M3_DSM_2279_Contig423	2506381025
NODE_67_length_15706_cov_30.712849	15790	3109577	151	21	25	11	Methanoplanus_limicola_M3_DSM_2279_Contig423	2506381025
NODE_68_length_10551_cov_30.775093	10635	3109577	151	21	25	11	Methanoplanus_limicola_M3_DSM_2279_Contig423	2506381025
NODE_69_length_36723_cov_30.679628	36807	3109577	151	21	25	11	Methanoplanus_limicola_M3_DSM_2279_Contig423	2506381025
NODE_70_length_52941_cov_30.954515	53025	3109577	151	21	25	11	Methanoplanus_limicola_M3_DSM_2279_Contig423	2506381025
NODE_71_length_17332_cov_31.064562	17416	3109577	151	21	25	11	Methanoplanus_limicola_M3_DSM_2279_Contig423	2506381025
NODE_72_length_4019_cov_31.642696	4103	3109577	151	21	0	11	Methanoplanus_limicola_M3_DSM_2279_Contig423	2506381025
NODE_73_length_48713_cov_30.633383	48797	3109577	151	21	25	11	Methanoplanus_limicola_M3_DSM_2279_Contig423	2506381025
NODE_74_length_63593_cov_30.680296	63677	3109577	151	21	25	11	Methanoplanus_limicola_M3_DSM_2279_Contig423	2506381025
NODE_75_length_87792_cov_30.828583	87876	3109577	151	21	25	11	Methanoplanus_limicola_M3_DSM_2279_Contig423	2506381025
NODE_76_length_9170_cov_31.192911	9254	3109577	151	21	25	11	Methanoplanus_limicola_M3_DSM_2279_Contig423	2506381025
NODE_77_length_16861_cov_30.409288	16945	3109577	151	21	0	11	Methanoplanus_limicola_M3_DSM_2279_Contig423	2506381025
NODE_78_length_24717_cov_30.888376	24801	3109577	151	21	25	11	Methanoplanus_limicola_M3_DSM_2279_Contig423	2506381025
NODE_79_length_27771_cov_30.681431	27855	3109577	151	21	25	11	Methanoplanus_limicola_M3_DSM_2279_Contig423	2506381025
NODE_80_length_27746_cov_30.890291	27830	3109577	151	21	25	11	Methanoplanus_limicola_M3_DSM_2279_Contig423	2506381025
NODE_81_length_21624_cov_30.648817	21708	3109577	151	21	25	11	Methanoplanus_limicola_M3_DSM_2279_Contig423	2506381025
NODE_82_length_17054_cov_30.786501	17138	3109577	151	21	25	11	Methanoplanus_limicola_M3_DSM_2279_Contig423	2506381025
NODE_83_length_3076_cov_30.384916	3160	3109577	151	21	0	11	Methanoplanus_limicola_M3_DSM_2279_Contig423	2506381025
NODE_84_length_1931_cov_30.856033	2015	3109577	151	21	0	11	Methanoplanus_limicola_M3_DSM_2279_Contig423	2506381025
NODE_85_length_28150_cov_31.259823	28234	3109577	151	21	25	11	Methanoplanus_limicola_M3_DSM_2279_Contig423	2506381025
NODE_86_length_29776_cov_31.184444	29860	3109577	151	21	25	11	Methanoplanus_limicola_M3_DSM_2279_Contig423	2506381025
NODE_87_length_2067_cov_31.032898	2151	3109577	151	21	0	11	Methanoplanus_limicola_M3_DSM_2279_Contig423	2506381025
NODE_88_length_11882_cov_30.311142	11966	3109577	151	21	25	11	Methanoplanus_limicola_M3_DSM_2279_Contig423	2506381025
NODE_89_length_15116_cov_30.182919	15200	3109577	151	21	25	11	Methanoplanus_limicola_M3_DSM_2279_Contig423	2506381025
NODE_90_length_16005_cov_30.743017	16089	3109577	151	21	25	11	Methanoplanus_limicola_M3_DSM_2279_Contig423	2506381025
NODE_91_length_39344_cov_30.859394	39428	3109577	151	21	25	11	Methanoplanus_limicola_M3_DSM_2279_Contig423	2506381025
NODE_92_length_6629_cov_31.451199	6713	3109577	151	21	0	11	Methanoplanus_limicola_M3_DSM_2279_Contig423	2506381025
NODE_93_length_47428_cov_30.944063	47512	3109577	151	21	25	11	Methanoplanus_limicola_M3_DSM_2279_Contig423	2506381025
NODE_94_length_26614_cov_30.912828	26698	3109577	151	21	25	11	Methanoplanus_limicola_M3_DSM_2279_Contig423	2506381025
NODE_95_length_10749_cov_30.894316	10833	3109577	151	21	25	11	Methanoplanus_limicola_M3_DSM_2279_Contig423	2506381025
NODE_96_length_60530_cov_30.790815	60614	3109577	151	21	25	11	Methanoplanus_limicola_M3_DSM_2279_Contig423	2506381025
NODE_97_length_70187_cov_30.761665	70271	3109577	151	21	25	11	Methanoplanus_limicola_M3_DSM_2279_Contig423	2506381025
NODE_98_length_1971_cov_31.190258	2055	3109577	151	21	25	11	Methanoplanus_limicola_M3_DSM_2279_Contig423	2506381025
NODE_99_length_77718_cov_30.988934	77802	3109577	151	21	25	11	Methanoplanus_limicola_M3_DSM_2279_Contig423	2506381025
NODE_11534_length_715_cov_14.686713	799	4889	4	111	0	0	Providencia_stuartii_MRSN_2154_NC_017731	2513237180
NODE_11536_length_489_cov_11.862986	573	4889	4	111	0	0	Providencia_stuartii_MRSN_2154_NC_017731	2513237180
NODE_11547_length_1613_cov_5.576565	1697	4889	4	111	0	0	Providencia_stuartii_MRSN_2154_NC_017731	2513237180
NODE_11555_length_2072_cov_5.119691	2156	4889	4	111	44	0	Providencia_stuartii_MRSN_2154_NC_017731	2513237180
NODE_1361_length_61891_cov_62.315086	61975	1730944	38	33	9	37	Methanococcus_maripaludis_X1_NC_015847	2511231109
NODE_1362_length_18952_cov_62.748840	19036	1730944	38	33	9	37	Methanococcus_maripaludis_X1_NC_015847	2511231109
NODE_1363_length_247046_cov_62.520336	247130	1730944	38	33	9	37	Methanococcus_maripaludis_X1_NC_015847	2511231109
NODE_1364_length_27185_cov_62.434872	27269	1730944	38	33	9	37	Methanococcus_maripaludis_X1_NC_015847	2511231109
NODE_1365_length_61027_cov_62.151047	61111	1730944	38	33	9	37	Methanococcus_maripaludis_X1_NC_015847	2511231109
NODE_1366_length_82051_cov_62.579117	82135	1730944	38	33	9	37	Methanococcus_maripaludis_X1_NC_015847	2511231109
NODE_1367_length_333775_cov_62.427959	333859	1730944	38	33	9	37	Methanococcus_maripaludis_X1_NC_015847	2511231109
NODE_1368_length_48447_cov_62.648029	48531	1730944	38	33	9	37	Methanococcus_maripaludis_X1_NC_015847	2511231109
NODE_1369_length_58762_cov_61.978184	58846	1730944	38	33	9	37	Methanococcus_maripaludis_X1_NC_015847	2511231109
NODE_1370_length_90804_cov_62.462238	90888	1730944	38	33	9	37	Methanococcus_maripaludis_X1_NC_015847	2511231109
NODE_1371_length_29071_cov_62.041794	29155	1730944	38	33	9	37	Methanococcus_maripaludis_X1_NC_015847	2511231109
NODE_1372_length_5282_cov_61.884323	5366	1730944	38	33	9	37	Methanococcus_maripaludis_X1_NC_015847	2511231109
NODE_1373_length_16406_cov_62.251553	16490	1730944	38	33	9	37	Methanococcus_maripaludis_X1_NC_015847	2511231109
NODE_1374_length_152732_cov_62.247288	152816	1730944	38	33	9	37	Methanococcus_maripaludis_X1_NC_015847	2511231109
NODE_1375_length_50309_cov_62.676182	50393	1730944	38	33	9	37	Methanococcus_maripaludis_X1_NC_015847	2511231109
NODE_1376_length_4737_cov_61.668144	4821	1730944	38	33	9	37	Methanococcus_maripaludis_X1_NC_015847	2511231109
NODE_1377_length_57380_cov_62.855576	57464	1730944	38	33	9	37	Methanococcus_maripaludis_X1_NC_015847	2511231109
NODE_1378_length_7446_cov_61.483345	7530	1730944	38	33	9	37	Methanococcus_maripaludis_X1_NC_015847	2511231109
NODE_1379_length_48842_cov_62.421051	48926	1730944	38	33	9	37	Methanococcus_maripaludis_X1_NC_015847	2511231109
NODE_1380_length_64475_cov_62.501373	64559	1730944	38	33	9	37	Methanococcus_maripaludis_X1_NC_015847	2511231109
NODE_1381_length_25149_cov_62.140324	25233	1730944	38	33	9	37	Methanococcus_maripaludis_X1_NC_015847	2511231109
NODE_1382_length_135994_cov_62.503273	136078	1730944	38	33	9	37	Methanococcus_maripaludis_X1_NC_015847	2511231109
NODE_1383_length_3077_cov_61.554436	3161	1730944	38	33	0	37	Methanococcus_maripaludis_X1_NC_015847	2511231109
NODE_1384_length_28882_cov_62.722389	28966	1730944	38	33	9	37	Methanococcus_maripaludis_X1_NC_015847	2511231109
NODE_1385_length_41004_cov_62.674129	41088	1730944	38	33	9	37	Methanococcus_maripaludis_X1_NC_015847	2511231109
NODE_1386_length_12522_cov_61.892189	12606	1730944	38	33	9	37	Methanococcus_maripaludis_X1_NC_015847	2511231109
NODE_1388_length_3301_cov_61.520145	3385	1730944	38	33	9	0	Methanococcus_maripaludis_X1_NC_015847	2511231109
NODE_1391_length_509_cov_120.673874	593	1730944	38	33	0	0	Methanococcus_maripaludis_X1_NC_015847	2511231109
NODE_1394_length_1233_cov_61.900242	1317	1730944	38	33	0	55	Methanococcus_maripaludis_X1_NC_015847	2511231109
NODE_1397_length_3020_cov_60.645695	3104	1730944	38	33	10	0	Methanococcus_maripaludis_X1_NC_015847	2511231109
NODE_1399_length_2160_cov_62.745369	2244	1730944	38	33	0	55	Methanococcus_maripaludis_X1_NC_015847	2511231109
NODE_1402_length_545_cov_63.163303	629	1730944	38	33	0	0	Methanococcus_maripaludis_X1_NC_015847	2511231109
NODE_1411_length_930_cov_62.343010	1014	1730944	38	33	0	0	Methanococcus_maripaludis_X1_NC_015847	2511231109
NODE_1415_length_589_cov_64.986420	673	1730944	38	33	0	0	Methanococcus_maripaludis_X1_NC_015847	2511231109
NODE_1417_length_538_cov_61.308552	622	1730944	38	33	0	0	Methanococcus_maripaludis_X1_NC_015847	2511231109
NODE_1419_length_1180_cov_61.910168	1264	1730944	38	33	0	0	Methanococcus_maripaludis_X1_NC_015847	2511231109
NODE_1426_length_580_cov_65.120689	664	1730944	38	33	0	37	Methanococcus_maripaludis_X1_NC_015847	2511231109
NODE_1436_length_3111_cov_124.552559	3195	1730944	38	33	18	0	Methanococcus_maripaludis_X1_NC_015847	2511231109
NODE_3186_length_86063_cov_21.549168	86147	4377810	180	8	42	5	Shewanella_denitrificans_OS217	637000256
NODE_3187_length_53826_cov_21.807287	53910	4377810	180	8	42	5	Shewanella_denitrificans_OS217	637000256
NODE_3188_length_1422_cov_42.754570	1506	4377810	180	8	0	5	Shewanella_denitrificans_OS217	637000256
NODE_3189_length_56962_cov_21.502932	57046	4377810	180	8	42	5	Shewanella_denitrificans_OS217	637000256
NODE_3190_length_116779_cov_21.604149	116863	4377810	180	8	42	5	Shewanella_denitrificans_OS217	637000256
NODE_3191_length_49021_cov_21.493504	49105	4377810	180	8	42	5	Shewanella_denitrificans_OS217	637000256
NODE_3192_length_69412_cov_21.493979	69496	4377810	180	8	42	5	Shewanella_denitrificans_OS217	637000256
NODE_3193_length_52322_cov_21.637381	52406	4377810	180	8	42	5	Shewanella_denitrificans_OS217	637000256
NODE_3194_length_22547_cov_21.433451	22631	4377810	180	8	42	5	Shewanella_denitrificans_OS217	637000256
NODE_3195_length_110429_cov_21.543480	110513	4377810	180	8	42	5	Shewanella_denitrificans_OS217	637000256
NODE_3196_length_101208_cov_21.297733	101292	4377810	180	8	42	5	Shewanella_denitrificans_OS217	637000256
NODE_3197_length_173225_cov_21.583698	173309	4377810	180	8	42	5	Shewanella_denitrificans_OS217	637000256
NODE_3198_length_52150_cov_21.453844	52234	4377810	180	8	42	5	Shewanella_denitrificans_OS217	637000256
NODE_3199_length_75146_cov_21.630665	75230	4377810	180	8	42	5	Shewanella_denitrificans_OS217	637000256
[truncated: 3,669 more rows]

## Sheet: GM_19 Blue contigs
SPAdes contig name	Sharon et al. Bin ID	Identity
contig_10165_299432083_299432082_0_l=000891_891	CARPRO_C00002(id=20098)	82.05
contig_10379_298177747_298177746_0_l=000708_708	CARPRO_C00011(id=20107)	86.44
contig_10447_297467373_297467372_0_l=000582_582	CARPRO_C00006(id=20102)	86.54
contig_10953_299567075_299567074_0_l=001114_1114	CARPRO_C00008(id=20104)	83.58
contig_11066_298388230_298388229_0_l=001202_1202	CARPRO_C00001(id=20097)	80.39
contig_11105_298126277_298126276_0_l=000580_580	CARPRO_C00006(id=20102)	86.87
contig_11319_300749129_300749128_0_l=000862_862	CARPRO_C00001(id=20097)	85.7
contig_11370_295899788_295899787_0_l=000749_749	CARPRO_C00004(id=20100)	87.45
contig_12555_300495612_300495611_0_l=000763_763	CARPRO_C00003(id=20099)	88.97
contig_12589_476918638_476918637_0_l=000535_535	CARPRO_C00004(id=20100)	90.45
contig_12608_476918704_476918703_0_l=000663_663	CARPRO_C00002(id=20098)	86.73
contig_12872_476919621_476919620_0_l=001459_1459	CARPRO_C00008(id=20104)	84.38
contig_12993_298400014_298400013_0_l=000612_612	CARPRO_C00015(id=20111)	88.25
contig_12998_300759325_300759324_0_l=000523_523	CARPRO_C00002(id=20098)	86.69
contig_13235_476920916_476920915_0_l=000826_826	CARPRO_C00001(id=20097)	82.25
contig_13344_476921320_476921319_0_l=001379_1379	CARPRO_C00006(id=20102)	78.67
contig_13422_298139365_298139364_0_l=000775_775	CARPRO_C00011(id=20107)	84.13
contig_13560_295125196_295125195_0_l=000724_724	CARPRO_C00011(id=20107)	84.37
contig_13677_476922476_476922475_0_l=000991_991	CARPRO_C00003(id=20099)	89.11
contig_13776_476922825_476922824_0_l=000639_639	CARPRO_C00001(id=20097)	84.98
contig_14011_476923654_476923653_0_l=000604_604	CARPRO_C00002(id=20098)	83.58
contig_14178_298273349_298273348_0_l=000549_549	CARPRO_C00005(id=20101)	83.61
contig_14403_295389243_295389242_0_l=000542_542	CARPRO_C00008(id=20104)	91.16
contig_1446_298459560_298459559_0_l=000553_553	CARPRO_C00011(id=20107)	84.41
contig_14729_300659091_300659090_0_l=000528_528	CARPRO_C00009(id=20105)	86.17
contig_14816_476920391_476920390_0_l=000860_860	CARPRO_C00001(id=20097)	85.76
contig_1493_300163811_300163810_0_l=000899_899	CARPRO_C00011(id=20107)	86.43
contig_1504_289809207_289809206_0_l=000651_651	CARPRO_C00003(id=20099)	85.3
contig_15386_300773156_300773155_0_l=000753_753	CARPRO_C00006(id=20102)	86.19
contig_15399_299855731_299855730_0_l=000832_832	CARPRO_C00002(id=20098)	79.86
contig_15845_296654018_296654017_0_l=001200_1200	CARPRO_C00004(id=20100)	84.25
contig_16357_297896805_297896804_0_l=000864_864	CARPRO_C00002(id=20098)	85.09
contig_17113_296723149_296723148_0_l=000783_783	CARPRO_C00001(id=20097)	83.48
contig_1719_300296307_300296306_0_l=000801_801	CARPRO_C00002(id=20098)	87.33
contig_17345_297486069_297486068_0_l=000744_744	CARPRO_C00001(id=20097)	85.64
contig_17603_297251114_297251113_0_l=000713_713	CARPRO_C00006(id=20102)	85.69
contig_17674_300790432_300790431_0_l=001567_1567	CARPRO_C00004(id=20100)	79.38
contig_1770_10684_10683_0_l=002279_2279	CARPRO_C00023(id=20119)	79.36
contig_17941_299612926_299612925_0_l=000893_893	CARPRO_C00002(id=20098)	84.62
contig_18189_295158408_295158407_0_l=000608_608	CARPRO_C00011(id=20107)	79.96
contig_18371_299091884_299091883_0_l=001548_1548	CARPRO_C00002(id=20098)	87.44
contig_18518_299224140_299224139_0_l=000538_538	CARPRO_C00004(id=20100)	86.36
contig_18536_296340687_296340686_0_l=000826_826	CARPRO_C00002(id=20098)	86.86
contig_18661_295555233_295555232_0_l=000664_664	CARPRO_C00001(id=20097)	85.39
contig_19690_293098173_293098172_0_l=000549_549	CARPRO_C00002(id=20098)	78.55
contig_1981_298856181_298856180_0_l=000786_786	CARPRO_C00001(id=20097)	84.99
contig_19931_300831712_300831711_0_l=000597_597	CARPRO_C00004(id=20100)	91.09
contig_20080_299891465_299891464_0_l=000682_682	CARPRO_C00004(id=20100)	85.78
contig_2305_299513435_299513434_0_l=000520_520	CARPRO_C00002(id=20098)	86.51
contig_2393_298596509_298596508_0_l=000834_834	CARPRO_C00004(id=20100)	81.03
contig_2475_298859177_298859176_0_l=000746_746	CARPRO_C00004(id=20100)	88.83
contig_2683_16451_16450_0_l=002266_2266	CARPRO_C00001(id=20097)	81.46
contig_2889_300303559_300303558_0_l=000698_698	CARPRO_C00004(id=20100)	83.14
contig_3096_298469816_298469815_0_l=000927_927	CARPRO_C00008(id=20104)	83.66
contig_3117_295717393_295717392_0_l=000564_564	CARPRO_C00003(id=20099)	87.08
contig_3169_299256634_299256633_0_l=001129_1129	CARPRO_C00002(id=20098)	81.58
contig_3318_297815735_297815734_0_l=001185_1185	CARPRO_C00002(id=20098)	82.96
contig_375_2212_2211_0_l=001871_1871	CARPRO_C00001(id=20097)	80.49
contig_3982_297950554_297950553_0_l=000536_536	CARPRO_C00004(id=20100)	88.72
contig_4081_298475448_298475447_0_l=000502_502	CARPRO_C00002(id=20098)	88.45
contig_4145_24881_24880_0_l=001679_1679	CARPRO_C00002(id=20098)	88.53
contig_4147_299000130_299000129_0_l=000542_542	CARPRO_C00011(id=20107)	86.86
contig_4438_291268658_291268657_0_l=000566_566	CARPRO_C00015(id=20111)	84.01
contig_4663_296643908_296643907_0_l=000568_568	CARPRO_C00004(id=20100)	85.64
contig_4800_28768_28767_0_l=002013_2013	CARPRO_C00014(id=20110)	81.96
contig_4806_294285451_294285450_0_l=000800_800	CARPRO_C00003(id=20099)	83.56
contig_5177_30960_30959_0_l=002382_2382	CARPRO_C00002(id=20098)	80.84
contig_5184_294811916_294811915_0_l=000595_595	CARPRO_C00003(id=20099)	84.23
contig_5242_297695835_297695834_0_l=000533_533	CARPRO_C00006(id=20102)	86.82
contig_5398_32222_32221_0_l=001677_1677	CARPRO_C00001(id=20097)	82.55
contig_5530_298221821_298221820_0_l=000754_754	CARPRO_C00001(id=20097)	80.24
contig_5652_33663_33662_0_l=002643_2643	CARPRO_C00003(id=20099)	86.72
contig_5717_34101_34100_0_l=001762_1762	CARPRO_C00011(id=20107)	88.27
contig_5765_286557813_286557812_0_l=000727_727	CARPRO_C00001(id=20097)	83.8
contig_622_3648_3647_0_l=003739_3739	CARPRO_C00003(id=20099)	84.64
contig_622_3648_3647_0_l=003739_3739	CARPRO_C00003(id=20099)	89.52
contig_6290_300192537_300192536_0_l=000531_531	CARPRO_C00002(id=20098)	89.45
contig_6292_37669_37668_0_l=002668_2668	CARPRO_C00011(id=20107)	80.13
contig_6322_294425542_294425541_0_l=000500_500	CARPRO_C00003(id=20099)	89.2
contig_640_298014662_298014661_0_l=000556_556	CARPRO_C00008(id=20104)	85.1
contig_6566_39265_39264_0_l=001917_1917	CARPRO_C00006(id=20102)	84.19
contig_6776_299802218_299802217_0_l=001076_1076	CARPRO_C00014(id=20110)	85.05
contig_7007_41967_41966_0_l=002221_2221	CARPRO_C00002(id=20098)	80.85
contig_7122_299673326_299673325_0_l=001130_1130	CARPRO_C00003(id=20099)	80.56
contig_7150_299899889_299899888_0_l=000853_853	CARPRO_C00003(id=20099)	83.04
contig_8192_296404165_296404164_0_l=000675_675	CARPRO_C00003(id=20099)	86.4
contig_8238_299156976_299156975_0_l=000518_518	CARPRO_C00002(id=20098)	86.8
contig_8667_294310343_294310342_0_l=000725_725	CARPRO_C00011(id=20107)	77.56
contig_9192_294707367_294707366_0_l=000824_824	CARPRO_C00003(id=20099)	87.21
contig_9237_295887356_295887355_0_l=000591_591	CARPRO_C00002(id=20098)	84.6
contig_9400_299951667_299951666_0_l=000796_796	CARPRO_C00006(id=20102)	84.05
contig_9563_296151684_296151683_0_l=000753_753	CARPRO_C00002(id=20098)	88.31
contig_9602_320924522_320924521_0_l=000726_726	CARPRO_C00006(id=20102)	84.67
	AVERAGE	84.8495

## Sheet: GM_11 Blue contigs
	SPAdes contig name	Sharon et al. Bin ID	Identity
	contig_10152_63588_63587_0_l=009429_9429	CARPRO_C00017(id=20113)	100
	contig_10152_63588_63587_0_l=009429_9429	CARPRO_C00017(id=20113)	100
	contig_10152_63588_63587_0_l=009429_9429	CARPRO_C00017(id=20113)	100
	contig_10243_64043_64043_0_l=073966_73966	CARPRO_C00008(id=20104)	99.87
	contig_10243_64043_64043_0_l=073966_73966	CARPRO_C00008(id=20104)	99.87
	contig_10243_64043_64043_0_l=073966_73966	CARPRO_C00008(id=20104)	94.81
	contig_10243_64043_64043_0_l=073966_73966	CARPRO_C00008(id=20104)	94.81
	contig_10243_64043_64043_0_l=073966_73966	CARPRO_C00008(id=20104)	97.37
	contig_10243_64043_64043_0_l=073966_73966	CARPRO_C00008(id=20104)	97.37
	contig_10322_64461_64460_0_l=117242_117242	CARPRO_C00002(id=20098)	100
	contig_10322_64461_64460_0_l=117242_117242	CARPRO_C00002(id=20098)	100
	contig_10322_64461_64460_0_l=117242_117242	CARPRO_C00002(id=20098)	99.99
	contig_10322_64461_64460_0_l=117242_117242	CARPRO_C00002(id=20098)	100
	contig_10322_64461_64460_0_l=117242_117242	CARPRO_C00002(id=20098)	100
	contig_10322_64461_64460_0_l=117242_117242	CARPRO_C00002(id=20098)	96.49
	contig_10322_64461_64460_0_l=117242_117242	CARPRO_C00002(id=20098)	96.49
	contig_10322_64461_64460_0_l=117242_117242	CARPRO_C00002(id=20098)	100
	contig_10322_64461_64460_0_l=117242_117242	CARPRO_C00002(id=20098)	100
	contig_10322_64461_64460_0_l=117242_117242	CARPRO_C00002(id=20098)	100
	contig_10406_64845_64844_0_l=036944_36944	CARPRO_C00005(id=20101)	100
	contig_10406_64845_64844_0_l=036944_36944	CARPRO_C00005(id=20101)	99.99
	contig_10406_64845_64844_0_l=036944_36944	CARPRO_C00005(id=20101)	100
	contig_10406_64845_64844_0_l=036944_36944	CARPRO_C00005(id=20101)	100
	contig_10452_65026_65025_0_l=009275_9275	CARPRO_C00019(id=20115)	100
	contig_10458_65048_65047_0_l=324812_324812	CARPRO_C00002(id=20098)	100
	contig_10458_65048_65047_0_l=324812_324812	CARPRO_C00002(id=20098)	100
	contig_10458_65048_65047_0_l=324812_324812	CARPRO_C00002(id=20098)	100
	contig_10458_65048_65047_0_l=324812_324812	CARPRO_C00002(id=20098)	100
	contig_10458_65048_65047_0_l=324812_324812	CARPRO_C00002(id=20098)	100
	contig_10458_65048_65047_0_l=324812_324812	CARPRO_C00002(id=20098)	100
	contig_10458_65048_65047_0_l=324812_324812	CARPRO_C00002(id=20098)	100
	contig_10458_65048_65047_0_l=324812_324812	CARPRO_C00002(id=20098)	100
	contig_10458_65048_65047_0_l=324812_324812	CARPRO_C00002(id=20098)	100
	contig_10458_65048_65047_0_l=324812_324812	CARPRO_C00002(id=20098)	100
	contig_10458_65048_65047_0_l=324812_324812	CARPRO_C00002(id=20098)	100
	contig_10458_65048_65047_0_l=324812_324812	CARPRO_C00002(id=20098)	100
	contig_10458_65048_65047_0_l=324812_324812	CARPRO_C00002(id=20098)	100
	contig_10458_65048_65047_0_l=324812_324812	CARPRO_C00002(id=20098)	100
	contig_10458_65048_65047_0_l=324812_324812	CARPRO_C00002(id=20098)	100
	contig_10458_65048_65047_0_l=324812_324812	CARPRO_C00002(id=20098)	100
	contig_10458_65048_65047_0_l=324812_324812	CARPRO_C00002(id=20098)	100
	contig_10458_65048_65047_0_l=324812_324812	CARPRO_C00002(id=20098)	100
	contig_10458_65048_65047_0_l=324812_324812	CARPRO_C00002(id=20098)	100
	contig_10458_65048_65047_0_l=324812_324812	CARPRO_C00002(id=20098)	100
	contig_10458_65048_65047_0_l=324812_324812	CARPRO_C00002(id=20098)	100
	contig_10458_65048_65047_0_l=324812_324812	CARPRO_C00002(id=20098)	100
	contig_10521_65298_65297_0_l=033573_33573	CARPRO_C00008(id=20104)	100
	contig_10521_65298_65297_0_l=033573_33573	CARPRO_C00008(id=20104)	100
	contig_10521_65298_65297_0_l=033573_33573	CARPRO_C00008(id=20104)	99.5
	contig_10521_65298_65297_0_l=033573_33573	CARPRO_C00008(id=20104)	99.98
	contig_10521_65298_65297_0_l=033573_33573	CARPRO_C00008(id=20104)	96.03
	contig_10715_65957_65956_0_l=259448_259448	CARPRO_C00001(id=20097)	100
	contig_10715_65957_65956_0_l=259448_259448	CARPRO_C00001(id=20097)	100
	contig_10715_65957_65956_0_l=259448_259448	CARPRO_C00001(id=20097)	99.9
	contig_10715_65957_65956_0_l=259448_259448	CARPRO_C00001(id=20097)	100
	contig_10715_65957_65956_0_l=259448_259448	CARPRO_C00001(id=20097)	100
	contig_10715_65957_65956_0_l=259448_259448	CARPRO_C00001(id=20097)	100
	contig_10715_65957_65956_0_l=259448_259448	CARPRO_C00001(id=20097)	100
	contig_10715_65957_65956_0_l=259448_259448	CARPRO_C00001(id=20097)	100
	contig_10715_65957_65956_0_l=259448_259448	CARPRO_C00001(id=20097)	100
	contig_10715_65957_65956_0_l=259448_259448	CARPRO_C00001(id=20097)	100
	contig_10715_65957_65956_0_l=259448_259448	CARPRO_C00001(id=20097)	100
	contig_10715_65957_65956_0_l=259448_259448	CARPRO_C00001(id=20097)	100
	contig_10715_65957_65956_0_l=259448_259448	CARPRO_C00001(id=20097)	100
	contig_10715_65957_65956_0_l=259448_259448	CARPRO_C00001(id=20097)	93.08
	contig_10715_65957_65956_0_l=259448_259448	CARPRO_C00001(id=20097)	93.08
	contig_10715_65957_65956_0_l=259448_259448	CARPRO_C00001(id=20097)	81.5
	contig_10715_65957_65956_0_l=259448_259448	CARPRO_C00001(id=20097)	77.67
	contig_10715_65957_65956_0_l=259448_259448	CARPRO_C00001(id=20097)	77.67
	contig_10715_65957_65956_0_l=259448_259448	CARPRO_C00001(id=20097)	74.21
	contig_10715_65957_65956_0_l=259448_259448	CARPRO_C00001(id=20097)	74.14
	contig_10715_65957_65956_0_l=259448_259448	CARPRO_C00001(id=20097)	74.48
	contig_10715_65957_65956_0_l=259448_259448	CARPRO_C00001(id=20097)	74.56
	contig_10715_65957_65956_0_l=259448_259448	CARPRO_C00001(id=20097)	98.25
	contig_10715_65957_65956_0_l=259448_259448	CARPRO_C00001(id=20097)	72.45
	contig_10715_65957_65956_0_l=259448_259448	CARPRO_C00001(id=20097)	72.45
	contig_10715_65957_65956_0_l=259448_259448	CARPRO_C00001(id=20097)	75.95
	contig_10715_65957_65956_0_l=259448_259448	CARPRO_C00001(id=20097)	75.95
	contig_10715_65957_65956_0_l=259448_259448	CARPRO_C00001(id=20097)	100
	contig_10715_65957_65956_0_l=259448_259448	CARPRO_C00001(id=20097)	73.3
	contig_10715_65957_65956_0_l=259448_259448	CARPRO_C00001(id=20097)	73.42
	contig_10715_65957_65956_0_l=259448_259448	CARPRO_C00001(id=20097)	91.3
	contig_10715_65957_65956_0_l=259448_259448	CARPRO_C00001(id=20097)	79.57
	contig_10715_65957_65956_0_l=259448_259448	CARPRO_C00001(id=20097)	79.57
	contig_10715_65957_65956_0_l=259448_259448	CARPRO_C00001(id=20097)	100
	contig_10715_65957_65956_0_l=259448_259448	CARPRO_C00001(id=20097)	96.97
	contig_10715_65957_65956_0_l=259448_259448	CARPRO_C00001(id=20097)	100
	contig_10715_65957_65956_0_l=259448_259448	CARPRO_C00001(id=20097)	96.97
	contig_10715_65957_65956_0_l=259448_259448	CARPRO_C00001(id=20097)	100
	contig_10715_65957_65956_0_l=259448_259448	CARPRO_C00001(id=20097)	79.27
	contig_10715_65957_65956_0_l=259448_259448	CARPRO_C00001(id=20097)	100
	contig_10715_65957_65956_0_l=259448_259448	CARPRO_C00001(id=20097)	100
	contig_10715_65957_65956_0_l=259448_259448	CARPRO_C00001(id=20097)	96.88
	contig_10715_65957_65956_0_l=259448_259448	CARPRO_C00001(id=20097)	100
	contig_10715_65957_65956_0_l=259448_259448	CARPRO_C00001(id=20097)	79.27
	contig_10715_65957_65956_0_l=259448_259448	CARPRO_C00001(id=20097)	96.88
	contig_10715_65957_65956_0_l=259448_259448	CARPRO_C00001(id=20097)	100
	contig_10715_65957_65956_0_l=259448_259448	CARPRO_C00001(id=20097)	100
	contig_10715_65957_65956_0_l=259448_259448	CARPRO_C00001(id=20097)	100
	contig_10715_65957_65956_0_l=259448_259448	CARPRO_C00001(id=20097)	100
	contig_10715_65957_65956_0_l=259448_259448	CARPRO_C00001(id=20097)	100
	contig_10715_65957_65956_0_l=259448_259448	CARPRO_C00001(id=20097)	100
	contig_10715_65957_65956_0_l=259448_259448	CARPRO_C00001(id=20097)	100
	contig_10715_65957_65956_0_l=259448_259448	CARPRO_C00001(id=20097)	100
	contig_10715_65957_65956_0_l=259448_259448	CARPRO_C00001(id=20097)	100
	contig_10715_65957_65956_0_l=259448_259448	CARPRO_C00001(id=20097)	100
	contig_10715_65957_65956_0_l=259448_259448	CARPRO_C00001(id=20097)	100
	contig_10715_65957_65956_0_l=259448_259448	CARPRO_C00001(id=20097)	100
	contig_10715_65957_65956_0_l=259448_259448	CARPRO_C00001(id=20097)	100
	contig_10715_65957_65956_0_l=259448_259448	CARPRO_C00001(id=20097)	100
	contig_10728_66003_66002_0_l=214007_214007	CARPRO_C00003(id=20099)	100
	contig_10728_66003_66002_0_l=214007_214007	CARPRO_C00003(id=20099)	100
	contig_10728_66003_66002_0_l=214007_214007	CARPRO_C00003(id=20099)	100
	contig_10728_66003_66002_0_l=214007_214007	CARPRO_C00003(id=20099)	100
	contig_10728_66003_66002_0_l=214007_214007	CARPRO_C00003(id=20099)	100
	contig_10728_66003_66002_0_l=214007_214007	CARPRO_C00003(id=20099)	99.99
	contig_10728_66003_66002_0_l=214007_214007	CARPRO_C00003(id=20099)	100
	contig_10728_66003_66002_0_l=214007_214007	CARPRO_C00003(id=20099)	100
	contig_10728_66003_66002_0_l=214007_214007	CARPRO_C00003(id=20099)	100
	contig_10728_66003_66002_0_l=214007_214007	CARPRO_C00003(id=20099)	100
	contig_10728_66003_66002_0_l=214007_214007	CARPRO_C00003(id=20099)	77.95
	contig_10728_66003_66002_0_l=214007_214007	CARPRO_C00003(id=20099)	77.95
	contig_10728_66003_66002_0_l=214007_214007	CARPRO_C00003(id=20099)	95.29
	contig_10728_66003_66002_0_l=214007_214007	CARPRO_C00003(id=20099)	95.29
	contig_10728_66003_66002_0_l=214007_214007	CARPRO_C00003(id=20099)	97.52
	contig_10728_66003_66002_0_l=214007_214007	CARPRO_C00003(id=20099)	97.52
	contig_10728_66003_66002_0_l=214007_214007	CARPRO_C00003(id=20099)	95.06
	contig_10728_66003_66002_0_l=214007_214007	CARPRO_C00003(id=20099)	95.06
	contig_11745_72545_72544_0_l=321091_321091	CARPRO_C00011(id=20107)	100
	contig_11745_72545_72544_0_l=321091_321091	CARPRO_C00011(id=20107)	100
	contig_11745_72545_72544_0_l=321091_321091	CARPRO_C00011(id=20107)	100
	contig_11745_72545_72544_0_l=321091_321091	CARPRO_C00011(id=20107)	100
	contig_11745_72545_72544_0_l=321091_321091	CARPRO_C00011(id=20107)	100
	contig_11745_72545_72544_0_l=321091_321091	CARPRO_C00011(id=20107)	100
	contig_11745_72545_72544_0_l=321091_321091	CARPRO_C00011(id=20107)	87.13
	contig_11745_72545_72544_0_l=321091_321091	CARPRO_C00011(id=20107)	87.13
	contig_11745_72545_72544_0_l=321091_321091	CARPRO_C00011(id=20107)	100
	contig_11745_72545_72544_0_l=321091_321091	CARPRO_C00011(id=20107)	100
	contig_17888_62529_62528_0_l=012636_12636	CARPRO_C00002(id=20098)	100
	contig_18570_475909606_475909605_0_l=042671_42671	CARPRO_C00006(id=20102)	100
	contig_58695_l=208066_long_61325__58695__208066	CARPRO_C00007(id=20103)	100
	contig_58695_l=208066_long_61325__58695__208066	CARPRO_C00007(id=20103)	99.99
	contig_58695_l=208066_long_61325__58695__208066	CARPRO_C00007(id=20103)	100
	contig_58695_l=208066_long_61325__58695__208066	CARPRO_C00007(id=20103)	100
	contig_58695_l=208066_long_61325__58695__208066	CARPRO_C00007(id=20103)	100
	contig_58695_l=208066_long_61325__58695__208066	CARPRO_C00007(id=20103)	100
	contig_58695_l=208066_long_61325__58695__208066	CARPRO_C00007(id=20103)	99.98
	contig_58695_l=208066_long_61325__58695__208066	CARPRO_C00007(id=20103)	100
	contig_58695_l=208066_long_61325__58695__208066	CARPRO_C00007(id=20103)	99.95
	contig_58695_l=208066_long_61325__58695__208066	CARPRO_C00007(id=20103)	100
	contig_58695_l=208066_long_61325__58695__208066	CARPRO_C00007(id=20103)	100
	contig_6208_37119_37118_0_l=001459_1459	CARPRO_C00021(id=20117)	100
	contig_7176_475965554_475965553_0_l=250920_250920	CARPRO_C00006(id=20102)	100
	contig_7176_475965554_475965553_0_l=250920_250920	CARPRO_C00006(id=20102)	100
	contig_7176_475965554_475965553_0_l=250920_250920	CARPRO_C00006(id=20102)	100
	contig_7176_475965554_475965553_0_l=250920_250920	CARPRO_C00006(id=20102)	100
	contig_7176_475965554_475965553_0_l=250920_250920	CARPRO_C00006(id=20102)	100
	contig_7176_475965554_475965553_0_l=250920_250920	CARPRO_C00006(id=20102)	100
	contig_7176_475965554_475965553_0_l=250920_250920	CARPRO_C00006(id=20102)	100
	contig_7176_475965554_475965553_0_l=250920_250920	CARPRO_C00006(id=20102)	99.98
	contig_7176_475965554_475965553_0_l=250920_250920	CARPRO_C00006(id=20102)	77.6
	contig_7176_475965554_475965553_0_l=250920_250920	CARPRO_C00006(id=20102)	77.66
	contig_7176_475965554_475965553_0_l=250920_250920	CARPRO_C00006(id=20102)	100
	contig_7176_475965554_475965553_0_l=250920_250920	CARPRO_C00006(id=20102)	100
	contig_7176_475965554_475965553_0_l=250920_250920	CARPRO_C00006(id=20102)	100
	contig_7176_475965554_475965553_0_l=250920_250920	CARPRO_C00006(id=20102)	100
	contig_7176_475965554_475965553_0_l=250920_250920	CARPRO_C00006(id=20102)	100
	contig_8417_51925_51924_0_l=042458_42458	CARPRO_C00015(id=20111)	100
	contig_8417_51925_51924_0_l=042458_42458	CARPRO_C00015(id=20111)	100
	contig_8417_51925_51924_0_l=042458_42458	CARPRO_C00015(id=20111)	100
	contig_8417_51925_51924_0_l=042458_42458	CARPRO_C00015(id=20111)	100
	contig_8417_51925_51924_0_l=042458_42458	CARPRO_C00015(id=20111)	100
	contig_8417_51925_51924_0_l=042458_42458	CARPRO_C00015(id=20111)	100
	contig_8417_51925_51924_0_l=042458_42458	CARPRO_C00015(id=20111)	100
	contig_8468_52251_52251_0_l=405644_405644	CARPRO_C00008(id=20104)	100
	contig_8468_52251_52251_0_l=405644_405644	CARPRO_C00008(id=20104)	100
	contig_8468_52251_52251_0_l=405644_405644	CARPRO_C00008(id=20104)	100
	contig_8468_52251_52251_0_l=405644_405644	CARPRO_C00008(id=20104)	100
	contig_8468_52251_52251_0_l=405644_405644	CARPRO_C00008(id=20104)	100
	contig_8468_52251_52251_0_l=405644_405644	CARPRO_C00008(id=20104)	100
	contig_8468_52251_52251_0_l=405644_405644	CARPRO_C00008(id=20104)	100
	contig_8468_52251_52251_0_l=405644_405644	CARPRO_C00008(id=20104)	100
	contig_8468_52251_52251_0_l=405644_405644	CARPRO_C00008(id=20104)	100
	contig_8468_52251_52251_0_l=405644_405644	CARPRO_C00008(id=20104)	100
	contig_8468_52251_52251_0_l=405644_405644	CARPRO_C00008(id=20104)	100
	contig_8468_52251_52251_0_l=405644_405644	CARPRO_C00008(id=20104)	100
	contig_8468_52251_52251_0_l=405644_405644	CARPRO_C00008(id=20104)	100
	contig_8468_52251_52251_0_l=405644_405644	CARPRO_C00008(id=20104)	100
	contig_8468_52251_52251_0_l=405644_405644	CARPRO_C00008(id=20104)	100
	contig_8468_52251_52251_0_l=405644_405644	CARPRO_C00008(id=20104)	100
	contig_8468_52251_52251_0_l=405644_405644	CARPRO_C00008(id=20104)	80.63
	contig_8468_52251_52251_0_l=405644_405644	CARPRO_C00008(id=20104)	80.63
	contig_8468_52251_52251_0_l=405644_405644	CARPRO_C00008(id=20104)	80.63
	contig_8468_52251_52251_0_l=405644_405644	CARPRO_C00008(id=20104)	80.63
	contig_8468_52251_52251_0_l=405644_405644	CARPRO_C00008(id=20104)	92.72
	contig_8468_52251_52251_0_l=405644_405644	CARPRO_C00008(id=20104)	92.72
	contig_8468_52251_52251_0_l=405644_405644	CARPRO_C00008(id=20104)	100
	contig_8468_52251_52251_0_l=405644_405644	CARPRO_C00008(id=20104)	100
	contig_8731_54241_54240_0_l=312693_312693	CARPRO_C00004(id=20100)	100
	contig_8731_54241_54240_0_l=312693_312693	CARPRO_C00004(id=20100)	100
	contig_8731_54241_54240_0_l=312693_312693	CARPRO_C00004(id=20100)	100
	contig_8731_54241_54240_0_l=312693_312693	CARPRO_C00004(id=20100)	100
	contig_8731_54241_54240_0_l=312693_312693	CARPRO_C00004(id=20100)	100
	contig_8731_54241_54240_0_l=312693_312693	CARPRO_C00004(id=20100)	100
	contig_8731_54241_54240_0_l=312693_312693	CARPRO_C00004(id=20100)	100
	contig_8731_54241_54240_0_l=312693_312693	CARPRO_C00004(id=20100)	100
	contig_8731_54241_54240_0_l=312693_312693	CARPRO_C00004(id=20100)	100
	contig_8731_54241_54240_0_l=312693_312693	CARPRO_C00004(id=20100)	100
	contig_8731_54241_54240_0_l=312693_312693	CARPRO_C00004(id=20100)	100
	contig_8731_54241_54240_0_l=312693_312693	CARPRO_C00004(id=20100)	100
	contig_8731_54241_54240_0_l=312693_312693	CARPRO_C00004(id=20100)	100
	contig_8731_54241_54240_0_l=312693_312693	CARPRO_C00004(id=20100)	100
	contig_8731_54241_54240_0_l=312693_312693	CARPRO_C00004(id=20100)	100
	contig_8731_54241_54240_0_l=312693_312693	CARPRO_C00004(id=20100)	100
	contig_8731_54241_54240_0_l=312693_312693	CARPRO_C00004(id=20100)	100
	contig_8731_54241_54240_0_l=312693_312693	CARPRO_C00004(id=20100)	100
	contig_8731_54241_54240_0_l=312693_312693	CARPRO_C00004(id=20100)	100
	contig_8731_54241_54240_0_l=312693_312693	CARPRO_C00004(id=20100)	100
	contig_8731_54241_54240_0_l=312693_312693	CARPRO_C00004(id=20100)	100
	contig_8731_54241_54240_0_l=312693_312693	CARPRO_C00004(id=20100)	100
	contig_8731_54241_54240_0_l=312693_312693	CARPRO_C00004(id=20100)	100
	contig_8731_54241_54240_0_l=312693_312693	CARPRO_C00004(id=20100)	75.86
	contig_8731_54241_54240_0_l=312693_312693	CARPRO_C00004(id=20100)	75.86
	contig_8731_54241_54240_0_l=312693_312693	CARPRO_C00004(id=20100)	100
	contig_8731_54241_54240_0_l=312693_312693	CARPRO_C00004(id=20100)	100
	contig_9001_56095_56094_0_l=004451_4451	CARPRO_C00013(id=20109)	100
	contig_9001_56095_56094_0_l=004451_4451	CARPRO_C00013(id=20109)	100
	contig_9001_56095_56094_0_l=004451_4451	CARPRO_C00013(id=20109)	100
[truncated: 12 more rows]

## Sheet: GM_19 Red contigs (CARPAC)
SPAdes contig name	Sharon et al. Bin ID	Identity
[truncated: 309 more rows]

[truncated: 2 more sheets: GM_19 Red contigs (CARPRO), GM_34 Vs IMG]
